# Supplementary material for: Efficient analysis of the toxicity and mechanisms of Hexaconazole and two other triazole fungicides: insights from integrated network toxicology, molecular docking and bioinformatics data
Source: Research Square preprint supplement (doi:10.21203/rs.3.rs-5318182/v1), 2024-10-29
Supplement: Supplementary file 1 [file 29d42b27d25e416737c5517d.xlsx]

## Sheet: Targets of Brain injury
LMBRD2
ADGRG1
DMBT1
TUBB2A
POMT1
B3GALNT2
CLCN3
CRAT
HK1
IL6
GBX1
BAALC
REPS1
UBTF
DLL1
RHOA
POMGNT1
POMK
ANXA11
PI4K2A
DAG1
ADCY8
GSTM3
MPDZ
MED11
NFIA
ADCY1
TUBB2B
TUBG1
EN1
HNRPR
MAPK8IP3
TUBB
FKTN
SLC4A10
TBR1
BEAN1
BCYRN1
COL4A2
AFG2A
CAMK4
WARS1
WDR45B
TBCD
KIF2A
NAXD
HPDL
GOLGA2
PTPN23
GRM7
ADAT3
DARS2
HLA-B
CKB
PLAA
COL4A1
RAC3
CNR1
KIF26A
EXOC7
FTH1
B4GAT1
KAT5
PPP1R21
TRAPPC12
TRAPPC4
NSRP1
DBX1
MFSD2A
CTNNA2
APC2
KIF5C
CKBE
BRE
EPHB2
GMPPB
SNORD118
TAF8
BRI3
CSF1R
ATP6V0A1
SEBOX
SHMT2
BDNF
ADCY2
JAM3
COASY
SMPD4
MED17
BEGAIN
APC
POMGNT2
NAXE
PTGDS
BSX1
WBP4
INTS11
RERE
RAB3B
PRUNE1
EXOC8
GAD1
DYNC1I2
PGAP1
FARSB
GBX2
ZIC1
NRROS
BASP1
CRPPA
STX1A
RHEB
CAMSAP1
LIPT2
NINJ2
LMO3
KRAS
PPFIBP1
DBX2
RXYLT1
PPP1R12A
DHX37
TRAPPC6B
POMT2
DYNC1H1
TUBB3
WDR81
FARSA
NACC1
COLGALT1
C19orf12
EXOSC5
SMG9
EXOC3L2
NOVA2
FKRP
FTL
U2AF2
PANK2
PYGB
PIGU
BCAS1
WDR4
LARGE
PLA2G6
WDR45
SMC1A
BEX1
BEX2
ERK
DXS423E
MDDGB3
LGMDR13
NS
ICH
CMT2O
MDDGB14
MDDGA5
AGO61
ESA1
NBIA2B
CDCBM15A
CDCBM6
BTPS2
TRAP80
RHOH12
HSF
MDDGC1
MDDGC2
MDDGA9
MDDGC7
IGAT
MDDGA6
JIP3
DEE104
RP79
BANDDOS
CDCBM1
CDCBM9
IBMWMA
MDDGC12
NBIA9
NEDBASS
NEDBSS
NEDHFBA
NEDHSB
NEDITPO
NEDMABA
NEDMIBA
NEDMISB
NEDMLOB
NEDMSBA
NEDSBAS
NEDSEBA
NEDSSBA
PEBEL
SRXY11
PCBC
KIAA0178
MDDGC3
MDDGA4
CFC2
BSVD
SMALED1
MDDGC14
MDDGB5
MDDGA8
PLIP
NBIA2A
CDCBM14B
CSCSC1
DESMD
DRIP80
EDFAOB
HGF
LGMDR11
LGMDR14
LGMDR16
LGMDR20
MDDGA13
MDDGB6
NEDBA
NEDEBA
NEDVIBA
CAPB
CDLS2
RP76
MDDGB4
RALD
RATOR
CDCBM13
LGMDR19
MDDGC5
MDDGC8
NEDFASB
PARK14
BDPLT22
DEE85
LGMDR15
MDDGC4
OES
PADMAL
EPHT3
SMC1L1
MEB
FCMD
KRAS2
BSVD1
DNCL
KIAA1851
MDC1C
GTDC2
HTATIP
IPLA2
GPR56
TUBB5
GS
CRSP6
ARHA
IFNB2
MDDGA1
MDDGA2
DAG
ISPD
B3GNT1
KIAA0609
SYD2
ATP6N1A
HKD
FMS
TUBB4
CAPR
ANX11
SGK196
FTHL6
KIAA1471
CDC91L1
CCDC128
SPATA5
C19orf61
NSMASE3
DNCI2
EXO84
PSF3L
WARS
WIPI3
EX070
NSRP70
APOA1BP
KIAA1517
CRS6
CKBB
XTP7
BRCC4
GLT25D1
RRP46
KIAA1236
NKHC2
UBF
GM130
SCP
U2AF65
MIGSB
MYPT1
MUPP1
CAMRQ2
BSVD2
NBIA3
TMEM5
MGC39558
APCL
CAP23
WIPI4
CAT1
PLAP
BTBD14B
ANOVA
DELTA1
TAD3
GLYA
HNRNPR
FBP21
TPC6
TBN
NEDHYBA
MGLUR7
DRES17
NBIA6
TTC15
CARKD
NBIA1
RBTNL2
FARSLB
CML33
BEAN
LRRC33
NBIA4
NEDSWMA
620746
ADCY3
ASPRS. LBSL
BC200
BRMUTD
CDCBM12
CDCBM3
CDCBM4
CDCBM5
CDCBM7
DENBA
DFNB44
ENDOVESLB
GST5
HLX1
IDDAS
LCC
NABC1
NBIA7
NDDRSB
NEDBEH
NEDDSBA
NEDESBA
NEDMISBA
NEDMSB
NEDSMBA
OG9
PEBAT
RHEB2
SPDA1
STX1
DRT
SMC1
MDDGA3
CMD1X
RASK2
HANAC
DNECL
MDDGA14
LGMDR9
C3orf39
TIP60
INAD1
TM7XN1
M40
FPC
CRSP77
ARH12
BSF2
MDDGB1
MDDGB2
MDDGC9
MDDGA7
IGNT
MDC1D
JSAP1
VPP1
HMSNR
HDLS1
CFEOM3A
CTNR
ALS23
MDDGA12
HFE5
HDPTP
GPIBD21
KLRAQ1
SPAF
HBMS
KIAA1418
IC2
SEC84
RC68
HMND9
WDR45L
KIAA1067
CCDC55
AIBP
NEDBAVC
BAIDCS
BCK
BMRS
BRCC45
BSVD3
CABAC
CDCBM11
CDCBM2
CONDBA
DEDHMB
DEE89
DEVDFB
GAMOS6
GUBS
HYC2
HYC3
LFTD
MDDGA10
MDDGA11
MRT74
NAP22
NBIA5
NBIA8
NDMSBA
NECFM
NEDASB
NEDBAS
NEDBGF
NEDCASB
NEDDFSB
NEDHFDB
NEDMEBA
NEDMLHB
NEDSBA
NEDSHBA
NMIHBA
PCH12
PEBAS
PEBEL2
PKAN
RHOM3
RILDBC1
RILDBC2
SCA31
SENEBAC
SPG43
SPG83
BDNF
PLA2G6
TP53
POMT2
BDNF-AS
PANK2
POMGNT1
MAPT
COL4A1
DAG1
APOE
PSEN1
B3GALNT2
CRPPA
GFAP
IL6
PIK3CA
APP
FKRP
FKTN
GMPPB
WDR45
GLUL
PTEN
TNF
SLC2A1
GAD1
EGFR
AFG2A
POMGNT2
COL4A2
POMT1
ADGRG1
CTNNB1
NPPB
COASY
LARGE1
BRAF
TSPAN1
SNCA
C19orf12
NTRK2
TUBB3
TSC2
SMARCB1
TUBB2B
DYNC1H1
IL10
POMK
CSF1R
AKT1
SMC3
FTL
TGFB1
PGAP1
TSC1
SLC6A4
B4GAT1
IFNG
MTOR
IDH1
BMP4
CACNA1A
RERE
PRKN
SMC1A
F2
TH
TUBB
KIF5C
TBCD
PTPN11
MAPK8IP3
GRIN2B
SOD1
IDH2
TUBB2A
INS
FOXG1
IL1B
IGF1
ACTB
KRAS
POLG
DARS2
COMT
FGFR1
DCX
H19
NKX2-1
CCL2
RAD21
GRIN1
TUBA1A
CASP3
JAM3
MTHFR
PDGFRB
SMAD5-AS1
PLP1
MECP2
SLC6A3
VWF
MFSD2A
MAPK1
TBR1
GCDH
PRNP
NF1
ACE
S100B
SHH
PAFAH1B1
SLC1A3
SYP
GDNF
LAMA2
PIK3R1
ENO2
SCN1A
AKT3
NGF
MBP
SOX2
NOTCH3
FMR1
TREM2
PTCH1
RELN
NOS2
SOD2-OT1
MAOA
PSAP
ABCB1
FGFR2
CKB
AQP4
MMP9
GRN
DLL1
NRAS
CBS
SMARCA4
SCN2A
UCHL1
CXCL8
GBA1
SQSTM1
GALC
GNAO1
KIF2A
TUBG1
SDHB
HK1
PI4KA
SPTAN1
PDGFB
TARDBP
TRAPPC9
TBCE
CP
SLC18A2
CDK5
SLC1A2
ALK
ICAM1
TCF4
LEP
ATP13A2
DNM1
BCL2
ZEB2
NOS3
FA2H
NAXE
HRAS
SNORD118
TLR4
VEGFA
MPO
SFTA3
CERNA3
NFIA
MPDZ
HTR1A
ALB
NTRK1
CRP
NOS1
OCLN
GRM7
ATM
TTR
PSEN2
RXYLT1
H3-3A
PDYN
LRRK2
LRP1
EGF
CDKN1B
RAC1
DNM1L
SUFU
SOX10
GLS
WDR81
CDH2
GJA1
ARID1A
LINC01672
CXCR4
MEG3
SLC17A5
HMOX1
UBE3A
MSH6
NLRP3
BACE1
BCYRN1
APC2
PAX6
CYP27A1
RHOA
NDE1
FAS
CASK
ATRX
LCN2
ASPA
MALAT1
ENG
GABRA1
DMD
DMBT1
ATP1A3
FGF2
STXBP1
STAT3
CHAT
ARX
ARSA
KCNB1
MSH2
EML1
VCP
APC
GCH1
HSPD1
CDKL5
PMS2
RAI1
RNASEH2C
SLC6A1
TREX1
MYCN
PARK7
SPAST
SPG11
MYC
GRIA3
ATP7B
KCNQ2
SMARCE1
SYNGAP1
ATP1A2
GRIN2A
DHCR7
CST3
SLC16A2
CNTN2
NPC1
OTX2
CHD7
MLC1
ABCD1
NOTCH1
TYROBP
IL4
ANK3
RB1
IL1A
HSPB1
WFS1
KIF1A
KMT2D
PAH
FLNA
SCN1B
MIR21
SCN8A
MEF2C
TERT
MLH1
DRD2
PRRT2
PCDH19
SLC12A5
ARG1
MED17
HLA-DRB1
ADAR
F5
DEPDC5
GABRG2
NAGLU
IGF1R
DARS1
HTT
PTPN23
MAG
CHRNA7
PPT1
CTNNA2
TOR1A
CRH
MED12
HLA-B
MAPK3
AARS2
CDKN2A
ARFGEF2
CNP
MAP1B
CLDN5
DNAJC6
SOX3
IL18
DDC
SLC20A2
SNAP25
SORL1
SERPINE1
GAMT
HTRA1
SCN3A
AIFM1
PTGS2
SCN9A
PIK3CG
EPCAM
GPT
LINC02605
VPS13A
CACNA1C
NIPBL
PRF1
FUS
ASXL1
MCPH1
TJP1
ALDH7A1
NF2
FOXP2
CDC42
TMX2-CTNND1
SLC1A1
CNTNAP2
CPT2
NPPA
SMPD1
SLC6A8
HGF
HEPACAM
WDR62
NFIX
CTSD
VHL
PNKP
ADAT3
SERPINI1
KCNJ10
PRUNE1
MIR142
EPO
DYRK1A
GLA
PLCB1
IQSEC2
NPC2
POMC
DICER1
NFE2L2
TBC1D24
CCND1
EP300
CRPPA-AS1
SHANK3
FABP7
GPT2
MET
HIF1A
BRCA2
DNMT3A
ACHE
PPARG
CTLA4
FGFR3
HTR2A
L1CAM
HLA-DQB1
POLR1C
KCNA1
INSR
NACC1
SDHA
MIR34A
PLAA
SRPX2
HPRT1
TUBB4A
EZH2
CREBBP
KRIT1
GRM1
LRP2
GLDC
TUG1
LMNB1
MEFV
MAP2K1
CTC1
CDK5RAP2
SETD2
GLUD1
COL18A1
ERBB4
ESR1
UBTF
PINK1
TUBGCP2
ASPM
XPR1
PHOX2B
CXCL10
PRKAR1A
ALDH5A1
HDAC4
MAP2
OTC
SDHD
PMM2
SCARB2
IFIH1
SLC25A22
APOA1
LGI1
BASP1
GNAQ
SMG9
HSPG2
KCNA2
SMAD4
CD46
CREB1
AGTR2
CDK6
ABCA7
GSK3B
MAPK10
XIST
HMGB1
PTGDS
PNKD
ABCC8
GLI2
GAS5
FOS
GLB1
GABRB3
DLG4
CDK4
SCARNA5
CNR1
MFN2
ABCG2
EDN1
ADSL
GNAS
RNASEH2A
LAMB1
SPR
SIX3
MEN1
CCDC88C
DHFR
STX1A
ABAT
MMP2
ADNP
EPHB2
ZFYVE26
TGIF1
RET
GRIK2
PRKDC
EIF2B5
GJC2
SLC4A10
PPP1R12A
NDUFS4
CD36
FH
GAL
AGT
MTRFR
MIR17
ACTG1
PPP3CA
TPP1
ANK2
IL2
LMNA
NSD1
HTRA2
BCL11A
PCNA
COL3A1
HEXA
GABBR1
HCN1
PHGDH
RNASEH2B
XDH
CLN3
SLC16A1
CACNA1G
SRC
CACNA1H
FGF8
L2HGDH
PIK3R2
NTF3
ACO2
SLC39A8
THBD
GNB1
SLC25A12
PGR-AS1
SLC19A3
PTK2
RAF1
HCRT
NEFL
DCTN1
EZR
CHRNA4
SIGMAR1
TWNK
VLDLR
ZIC1
MME
CAT
SYNJ1
SMARCA2
SZT2
EIF2B2
BMP2
JUN
RYR1
SATB2
CACNA1D
ROGDI
SLC6A9
NFKB1
KCNT1
DNMT1
CACNA1B
CLCN3
TIMM8A
OPA1
KIF5A
GATM
GATA3
CHMP2B
ACADM
SPG7
OPHN1
CALM1
PDCD10
RAC3
HEXB
TRIM8
CFH
SOX11
SAMHD1
PYCR2
STIL
ALPL
WWOX
TUBA8
CAMK2B
CCK
DBH
NEDD4L
MIR125A
ATN1
CIC
FOLR1
HSD17B10
RAB3GAP2
TSEN54
NEXMIF
ATL1
GABRD
GABRA5
C9orf72
ERBB2
CLN5
NR4A2
MIR25
NEAT1
WDR45B
FGF17
BCR
CRAT
MTR
BCOR
ST3GAL5
BSCL2
BPTF
GABRB2
CDH1
ACVR1
MVK
KAT6B
TRAPPC11
CEP290
F3
CASP8
CLN6
CYCS
AIMP1
DDX3X
DMXL2
PC
VCAM1
NES
ARHGEF9
SYNE1
AGER
CD4
GAPDH
MAPK8IP1
TXN2
FARS2
ARNT2
G6PC1
SPTBN4
KDM6A
GPHN
CSTB
GNRH1
HECW2
POLR3B
QARS1
YAP1
BCL2L1
UCP2
OFD1
CENPJ
IGF2
GABBR2
MT-TL1
KDR
KCNJ2
PAK3
MACF1
NRXN1
EPM2A
SLC9A6
CACNA1E
RAB18
SGCE
CCND2
MOCS2
SYT1
ITPR1
PRPS1
PPP2R1A
ANKLE2
ACVRL1
RTTN
HAVCR1
CAMK2A
ECE1
EIF2B1
FUCA1
ITGAM
ROBO1
MIR133B
SLC1A4
PIGU
MIR155
FTO
BAX
KATNB1
VPS11
ATP7A
ZIC2
STAT2
TMEM106B
FOXP1
AP4M1
PRODH
LAMP2
CERS1
GUSB
PLG
NAXD
ASTN2
PDHA1
LOC126863256
CSF3
AKT2
EHMT1
DYSF
CLPB
ADGRB1
KARS1
MAPK8
TECPR2
ATP6AP2
MCOLN1
ADAMTS13
MYLK
CASR
RNF216
RPS6KA3
DEAF1
FIG4
MGMT
ATP1A1
PIGA
SUOX
BRD4
CHD2
AARS1
JAK2
DPAGT1
AFF2
VDR
SERAC1
CRBN
BEX4
SLC25A13
ODC1
IL17A
SMAD2
MPC1
LDLR
COQ8A
PNPO
MIAT
PRKCA
PDCD1
MN1
ARID1B
GABRB1
MPV17
DNAJC5
MMACHC
ADCY5
NEU1
TBCK
RPGRIP1L
PCNT
PLAU
MOCS1
DLD
KCTD7
SLC25A1
CLCN2
KCNMA1
USP18
HIP1
IFT140
KMT2A
SETX
GPSM2
SIRT1
UNC80
IBA57
YWHAE
HCN2
RARS2
F7
ERCC6
RAB39B
GRIA1
SACS
SDHC
ACADS
TNFRSF1A
SMO
STX1B
PEX5
IDUA
PARP1
KAT5
ACTL6B
NCAM1
NR3C1
EXOSC3
INPP5E
HYCC1
MAGEL2
CDH5
EPRS1
GJB2
POLR3A
GNE
TYMP
GABRA2
C12orf57
SCO2
PSAT1
PDE4D
CC2D2A
CASP9
HUWE1
SOX9
EEF1A2
RAB3GAP1
EMX2
NARS2
MIR146B
CRYAB
ZSWIM6
PEX26
COL1A1
NKX6-2
GRID2
PLEKHG2
NECTIN1
MLYCD
GOLGA2
SELP
ADAM22
MEIS2
PEX1
TMEM107
REN
ASS1
VAMP2
GCK
AMPD2
RTN4
CTNND2
PEX6
IKBKG
MICU1
TRIO
TFRC
PURA
ITM2B
RYR3
MBD5
PCCB
ERCC2
PDP1
TK2
EPB41L1
LAMC3
BSX
DLAT
BCAP31
VARS1
RARS1
CRB2
KCNQ3
AHI1
RNASET2
PIGV
BTD
CALM2
ST3GAL3
CLU
SLC9A1
CSNK2A1
NPY
PCCA
HFE
TBK1
HERC2
EIF2AK3
QDPR
EARS2
SILC1
ERCC1
NDST1
PEX2
PACS2
MAPK14
EOMES
CD274
FARSB
MKS1
CHI3L1
RTN4IP1
C3
AMT
KIT
WASF1
CYP27B1
ACOX1
PECAM1
GCSH
GATAD2B
SPP1
MAF
KANK1
YWHAG
ABCC1
FGF23
HSD17B4
PVT1
MAST1
HESX1
VPS13B
TSPO
PODXL
CPT1A
CXCL12
RPS27A
MFSD8
AUTS2
SLC13A5
KCNJ11
AP3B2
PRTN3
CPS1
NRXN2
GRIN2D
TAT
HOTAIR
NHLRC1
ATP8A2
LMNB2
KCND3
ABL1
TSPAN7
VIM
RTN4R
PYGB
SYN1
NGFR
SLC6A17
PWAR1
MT-CYB
SARS1
NDN
DPYD
NLGN3
GBE1
NDP
CACNA2D2
TF
SCN5A
ANXA11
PEX10
ADD3
FAT4
CLN8
MYT1L
VRK1
ETHE1
CSF2
FASN
MIR210
SEPSECS
ALG13
ATXN2
GRIA2
SNCB
SCN11A
IL1RAPL1
CACNB4
WT1
WDFY3
TSEN2
HIBCH
PEX19
MIR223
PIK3CD
ACOT7
AIP
SERPINC1
BCL11B
NRROS
CNNM2
DCC
XRCC1
AMACR
PQBP1
PAX2
POLG2
ATP5F1A
FRRS1L
SNX14
ABCA1
NSDHL
ITGB3
NAGS
GFM1
CHRNB2
FASLG
GLI3
STAT1
DPM1
IDS
CCM2
BRCA1
PMPCA
PEX16
CCR2
SPARC
DIP2B
MT-ND1
PEX7
PPP1R15B
ACY1
SIK1
FGB
MIR146A
PPP2R5D
NLGN4X
AUH
ERCC8
TRPV4
NDUFV2
DCAF17
SUCLA2
SOD2
NTN1
TSEN15
MCCC2
CACNG2
CPLX1
RNU4ATAC
NAT8L
HDAC1
PTS
TRAPPC6B
ELANE
SNRPN
ADORA1
PDGFRA
LYRM7
BEAN1
STK11
RHEB
ABCB7
ADGRV1
GDI1
RHOBTB2
KIFBP
EIF2B3
MAP2K2
SLC39A14
ATP6V1B2
CHKB
OLIG2
AFG3L2
DNAJC19
TBX1
GSR
SRD5A3
CLCN6
COQ2
TIMP3
CHRNA2
KMT2C
ADA2
ATRIP
SLC12A2
PGK1
SURF1
MIR29A
GTPBP2
SLC25A4
SETD1A
BIN1
FTH1
CEP152
MIF
SLC25A15
CRHR1
MDM2
SLC35A2
ZNF335
DHCR24
REEP1
ADIPOQ
LBR
SV2A
TLR2
ERMARD
RBFOX1
HMGCL
FASTKD2
PEX11B
HSP90AA1
ZBTB20
PAK1
CDKN1A
IER3IP1
DANCR
ZNF423
EIF2B4
CSF1
MAPRE2
CALR
HERC1
ERF
KCNAB2
PLAT
FHL1
DLG1
IVD
MAX
PTH
NEUROD2
PDHB
ITGB1
ALDH4A1
EIF2AK2
CACNA2D1
GYS1
NDUFV1
GAP43
TGFB2
SLC12A6
NAA10
ADA
SUMF1
ALX4
AQP2
DPM2
GAA
ATXN10
HADH
PIGP
ACAD9
MIRLET7C
BCS1L
RLBP1
POGZ
MMUT
JAM2
GRIA4
KANSL1
B2M
TSFM
CDON
HIVEP2
IQSEC1
CEP164
LOC106627981
KNG1
TANGO2
ETFDH
COL2A1
GAD2
SREBF1
FBXL4
MCCC1
COL5A1
TBC1D23
KCNC1
JPH3
DPM3
CD40LG
SMAD3
HSPA4
SOX2-OT
MIR140
IL12A
KDM5C
COQ9
PPP2CA
FLCN
ANGPT1
CLCN4
TGFBR2
DKC1
NPHP1
MIR126
USP7
FN1
CCL5
KCNC3
NDUFS3
HLCS
MYO5A
GM2A
ATP2A2
CYFIP2
TMTC3
APTX
EGR1
CBL
DIAPH1
MAN2B1
ATR
DCHS1
COX6B1
AP1S2
CUL4B
SUCLG1
ZBTB18
TRAPPC12
TUBA4A
CAV1
EFTUD2
RRM2B
GNAI1
APOB
ALDH3A2
HCFC1
ITPA
IL1RN
SKI
PIK3CB
STUB1
COQ8B
NPRL3
GAN
CALM3
BTK
SLC22A5
MARS2
KCNH1
SNAP29
MID1
CUL3
MAOB
NOX4
ANGPT2
ETFA
PIGN
FGF1
PCLO
EMC1
KIF11
GLRA1
EMSLR
ABCA2
SDCCAG8
YY1
PTN
ATP6V0A1
NDUFS7
NADK2
UBQLN2
NMNAT1
ASTN1
NR2F1
OCRL
CCDC88A
TAF1
DOCK3
HBB
PDE10A
BMP6
CNTF
CHKA
ALG1
TBC1D20
PRL
DLG3
MTRR
VPS51
F8
ABCC9
FLVCR2
CDKN2B-AS1
NPAP1
H3-3B
MIR145
NECAP1
SHROOM4
ADORA2A
TMEM67
ARMC9
FANCC
TCTN2
LIG4
SETBP1
MB
ASH1L
ELN
CCR5
DPYS
NDUFS1
IL13
GPC3
PRKCG
SOX5
SETD5
NRG1
ASAH1
MSX2
SDHAF1
GRM5
KIRREL3
MIR221
GSTM1
ASXL3
RYR2
IL12B
FOXO1
SOX4
MDH2
GNPTAB
NTRK3
PEX3
PEX13
SLC37A4
LAMA1
FGA
PIGO
AGK
KCND2
MAGI2
DGUOK
OPA3
PRKRA
PPARA
MT-CO3
UBE2A
TTC19
SCP2
SLC2A3
SST
KCNJ6
SRCAP
AGTR1
MT3
CEP120
FBXO7
MMP3
SLC25A3
ATP6V0A2
GLI1
DDHD2
UBB
WDR73
KCNQ1OT1
PHACTR1
EIF4G1
ACSL4
FGF12
VPS35
CTSF
GJB1
COL4A2-AS1
EXOSC8
TIMP1
KCNQ5
ELP2
ALMS1
HDAC8
FBN1
MBTPS2
MBOAT7
BRAT1
MMADHC
CHEK2
SON
RANBP2
F10
TLR3
PHF8
HNRNPU
SLC25A20
POU1F1
NIPA1
SP1
TNNT2
CILK1
GRIP1
EDNRB
RPIA
GLRX5
FLT1
EFHC1
PGAP2
PROC
NPHP4
SHANK2
CIT
TTN
PSPH
GTPBP3
LEPR
CAMTA1
PTF1A
NALCN
ERCC3
PRSS12
LRPPRC
HCN4
KIF1B
PTCHD1
KLF13
UFM1
CCL3
ANO10
ATP6V1A
MEGF10
HNRNPH2
CEP135
BMP7
STX11
SLC25A46
AGRN
INTS11
AP4B1
FOXRED1
SLC7A5
NGLY1
MIR20A
D2HGDH
NBEA
SELE
TAC3
TNFSF11
CNTN4
LARS2
DOCK8
RPL10
SLC45A1
FADD
ITGA3
SLC6A19
TNNI3
FBP1
LOC129998005
MIR9-1
TRNT1
ECM1
CD34
TBL1XR1
CX3CR1
RBM8A
CNKSR2
CAMK2G
BCAN
RAD51
CHD8
ALAD
UPB1
TWIST1
RELA
CKM
MFF
TUSC3
CPOX
CHD3
HACE1
TIMP2
SIRPA
SNIP1
HMBS
SAMD9
TOE1
AGA
BCKDHB
IRF2BPL
HAX1
PIGQ
SLC9A9
SPTBN1
CYP2D6
RAP1A
CCR1
RBFOX3
ZMYM3
RUBCN
CFTR
TNC
TUBGCP6
TERC
BLTP1
CUX2
TAF2
COL6A2
SHMT2
KDM1A
EIF4E
MIR122
TRIM32
GHRL
DOLK
VARS2
CASP1
TMEM165
USP9X
SASS6
AHSG
KCTD17
FLII
UNC13D
THAP1
PEX12
CLTC
GRIN3A
NDUFAF4
MIR23A
OGT
GOSR2
NDUFS2
CDH11
SLC46A1
TMEM63A
ADARB1
ROBO3
ARF1
HCCS
SLC33A1
NDUFS8
VCAN
C5
GABRA6
RASA1
COG2
PLK4
ELOVL4
ERCC4
KIAA0586
MUC1
PIGT
SHOC2
PRKCZ
DHDDS
[truncated: 3,464 more rows]

## Sheet: Targets of Liver injury
SLC25A6
LRP5
ALG8
CDH17
APOB
PRKCSH
GLS2
PHKG2
DNAJB11
RNF220
ALPL
RINT1
FOCAD
LARS1
MARS1
TRMU
HADHA
FLD1
NBAS
SEC63
PHKA2
PKLR
RNASE2
HSD17B13
AGXT
HLA-B
PYGL
PHKB
PFKL
NINJ2
LEAP2
LCO
GYS2
Gene/Locus
FMO4
FMO1
FABP1
CPT1A
COX7A2
ARG1
ANT3
BMND1
CDG1H
CDH16
FLDB
G19P1
GA
GSD9C
HEDJ
HLD23
HOPS
ILFS3
KIAA1797
LARS
MARS
MTO2
MTPA
NAFLD1
NAFLD2
NAG
PCLD2
PHK
PK1
RNS2
SCDR9
SPAT
SPDA1
FLDP
DJ9
EDN
HPT1
LDLCQ4
LFIS
LRP7
MTRNS
PCLD1
PCLD3
SCOLIV
SOPH
TNSALP
XLG
HPPA
ABBP2
FCHL2
ILFS1
ILFS2
LR3
METRS
PYKL
ILLD
GSD9A
HPPO
OPPG
PKD6
OPTA1
CMT2U
HPPI
EVR4
TTD9
HPPC
PCLD4
SPG70
PKHD1
PKD1
TP53
PKD2
CTNNB1
IL6
TNF
PNPLA3
MIR7-3HG
HNF4A
GANAB
GPT
ALB
INS
SLC17A5
MEG3
H19
TGFB1
SERPINA1
PIK3CA
F2
APOE
MET
LOC126859690
MIR21
IL10
NR1H4
APC
STAT3
HFE
KRAS
MIR122
PTEN
TSC2
PPARG
HNF1A
BDNF-AS
MALAT1
AKT1
CYP3A4
ABCB11
HNF1B
IFNG
EGFR
NFE2L2
ICAM1
CASP8
CDKN2A
TERT
ABCB4
ATP7B
CYP2E1
SLC11A2
UGT1A1
HULC
MIR34A
GFER
GAS5
G6PC1
POLG
AFP
SOD2-OT1
CRP
TSC1
GGT1
HMOX1
CCND1
NOTCH1
MIR17
SLCO1B1
IL21R
BRAF
ABCC2
SMAD4
IL1B
HGF
FAS
CXCL8
GNAS
TUG1
ADIPOQ
NR1H3
MIR126
CBS
NRAS
CCL2
HRAS
SLC25A13
ACE
CP
PPARA
GLUL
LINC01672
CREBBP
NOS2
MIR27A
ATM
NF1
XIST
ALDOB
MIR22
IGF1
KIT
RXRA
KRT18
TLR4
GCK
APOA1
NTRK1
FAH
FGFR1
INSR
ALG9
MIR30A
CERNA3
LEP
MIR132
SLC2A2
F5
JAG1
LIVAR
PTPN11
VDR
SOD1
AGT
LIPA
YAP1
SLC2A1
VWF
SERPINE1
ATP8B1
LRP6
CASP3
MIR155
MIR125A
TMEM67
KRT7
FOXM1
FGFR2
TTR
MIR200B
MMUT
MIR200A
PVT1
HAMP
HOTAIR
MMP9
MTHFR
MIRLET7C
GPC3
MAPK1
GFAP
LCN2
RAF1
TF
MIR130A
ABCB1
KCNQ1OT1
MIR140
LINC-ROR
MIR15A
NPHP1
EGF
MYC
FASLG
MIR151A
MIR223
MAP2K1
NOTCH2
MIR107
OTC
AMACR
MTOR
MIR146A
ERBB2
MIR451A
SLCO1B3
IL1A
CFTR
MIR183
CTLA4
MIR31
XDH
CYP7A1
AXIN1
CYP1A2
NPHP3
MIR203A
ARID1A
HIF1A
PKD1-AS1
FBN1
CAT
IDH2
EPO
VEGFA
NPC1
OFD1
IDH1
TNFRSF1A
IGF2R
SRC
NPHP4
RET
NEAT1
FH
MIR221
SERPINC1
TMX2-CTNND1
MUC1
CPT2
ALK
IL2
MIR26A1
CEP290
NOS3
RPGRIP1L
ASS1
NFKB1
NTRK2
ENG
BCL2
F3
PMS2
MPV17
YARS1
SMAD5-AS1
MIR148A
NR1H2
SREBF1
PDGFRA
SMPD1
JAK2
MIR29C
ALPP
LINC02605
KRT20
PMM2
SLC37A4
BMP6
BAX
HLA-DRB1
XBP1
MIR214
MPO
FARSB
NAGLU
CFH
MIR378A
MIR29A
CYP2C9
IL4
LOC126806659
MIR142
CD46
CALCA
MIR23A
CYP27A1
PTGS2
SEPSECS
IGF2
THBD
MIRLET7B
HMGB1
GBA1
DKK3
MIR150
KRT8
CDC25A
INVS
DGUOK
MAPK8
CDH1
GJA1
JUN
REN
MIR222
TCF4
FBP1
MKS1
MIR139
TJP2
CYP2C19
PC
ABCA1
CC2D2A
DHCR7
UGT1A9
MIR18A
STK11
FGFR3
NLRP3
WT1
CAV1
POLG2
KRT19
MIR141
LDLR
MIR10B
BDNF
IL2RA
MIR20A
MIR25
MIR93
IL12RB1
FOS
DCDC2
MIR125B1
MIR106B
NR1I2
PGR-AS1
PCK1
PTH
FECH
MIR145
RBP4
LOC126806658
CES1
MTTP
SEC61A1
IFNA1
PIK3CG
NRG1
IL18
COL4A1
ESR1
CDKN3
ALDH2
CYCS
MIR143
GBE1
HMGCL
MIR195
SOD2
ATG7
MIR27B
MIR200C
PRMT7
TIMP1
GSTM1
CEBPA
UMOD
STAT1
ASL
DANCR
PCSK9
SMO
MIR16-1
MIR33A
NPC2
MIR212
IL17A
SNHG1
MIR216A
MIR127
BAAT
HBB
PSAP
ONECUT1
GAA
CXCL10
HP
GLA
CYP2B6
INPP5E
MIRLET7D
ERBB4
RAB4B-EGLN2
TFR2
WDR19
MIR23B
MIR182
SIRT1
TAT
MMP2
MIR181A1
UCA1
MIR215
HSD17B4
IL6R
ELN
SMAD3
MIR324
KDR
LPL
BAP1
TGFBR2
SPP1
ACOX1
SF3B1
MIR494
MIR191
CEP164
CCAT1
F9
TTC21B
MIR338
G6PD
FOXP3
CYP1A1
CXCR4
CD40LG
ACADM
SMAD2
ENO2
HMGCR
GUSB
CD36
BCS1L
CDKN2B-AS1
PDGFRB
FGA
HSD3B7
SLC10A1
MIR199B
RAD50
ABCC8
HJV
MIR152
MSR1
FGF2
EDN1
PEX2
BRCA2
CYP2D6
PEX5
AGTR1
NBN
IRS1
CASC2
EP300
SLC40A1
PTPRC
HOTTIP
RB1
VCAM1
RUVBL1
AGL
ADAMTS13
SQSTM1
IGF2-AS
MBL2
CAMTA1
MIR181C
VHL
HAVCR1
MIR30D
CDKN1B
HNF1A-AS1
MIR301A
LRRC56
MIR133B
MAPK14
PLG
MEFV
IFT172
PPIG
CYP2A6
DPYD
MIR185
EPCAM
LEPR
LIPC
ABCB7
AXL
LIG4
NEK8
NTRK3
ACTB
EZH2
TYMP
TLR2
ZFAS1
ELANE
CXCL12
COMT
CFI
DZIP1L
GATA3
SHOC2
CYP7B1
SELP
LMNA
SMARCA4
MSH2
TGFB2
NR3C1
TMEM216
CYTOR
AKR1D1
SLC30A10
PEX1
IDUA
CST3
CASR
ABCG5
MIR26B
B2M
PLA2G6
MIF
PAH
PEX13
DGCR5
GALT
MVK
PTCH1
ABCC3
GLB1
MAPK3
DMD
SCYL1
MIR30E
SNHG12
IQCB1
FASN
ABCG8
NGLY1
PGM1
PNPLA2
MIRLET7A1
MIR99A
CPS1
MIR30C1
BSCL2
NEU1
IDS
ADA
BRCA1
MIR19A
PEX6
HMBS
ARL13B
ACTA2
ROS1
CPOX
PEX11B
PEX19
HPRT1
GLUD1
MIR154
AKR1A1
LCAT
SDCCAG8
UCP2
ITGB1
UGT1A7
NOD2
LOC110806263
UGT1A4
XIAP
SLC25A20
MIR224
PCAT1
WRAP53
PEX14
PRKCD
HLA-DQB1
PRF1
MIRLET7E
CD44
MIR205
NAT2
PDGFRL
CDK4
MIR429
CLDN1
NGF
MIR186
S100B
TM6SF2
ATRX
PIK3R1
F10
MECOM
GNE
PEX16
HSPA4
ATP7A
PARP1
PPARGC1A
MIR181A2
TCTN2
MIR137
TH
MIR146B
CD79A
DLAT
ALAD
SOX2-OT
HPD
GSTP1
SOCS3
UFC1
NR5A2
TMEM231
GRHPR
SF3B2
PEX26
HADH
SHH
HSPB1
TNFSF11
SNHG6
MCU
ACADVL
NPPA
IL1RN
MT-TP
SLC5A5
RETN
ETFDH
EIF2AK3
CRNDE
HEIH
PCNA
EGR1
HOXA11-AS
MIR187
B9D1
FLNA
APP
FTH1
KCNJ11
ABCD1
IGFBP3
MAOA
MIRLET7G
GDNF
CEBPB
NOS1
ARSA
CD14
DDR2
MIR181B1
CDKN1A
VIM
LBR
ACVRL1
MMP1
PDGFB
UGT1A6
VTN
SLC25A15
C3
COL3A1
TWNK
CSF3
FN1
MIR500A
SST
ALDOA
BMP7
MDM2
CALR
TREX1
BTD
CD4
FOXA2
AKT2
MECP2
F7
SMARCB1
PEX12
MME
SYP
GAMT
MIR219A1
CYP3A5
CCN2
OCRL
ACTC1
FTL
MIR128-2
RELA
BMP2
CBL
MIR96
SERPINA3
IGF1R
MIR136
FMR1
LAMP2
MAT1A
TFAM
MIR24-2
GJB1
UROD
ADK
DDIT3
CCL5
SILC1
SNHG15
MIR22HG
RAC1
FOXO1
FLT1
TCTN3
ALMS1
ASAH1
IKBKB
TNNI3
DYNC2H1
APOC3
MIR9-2
PEX10
BBS2
TIMP2
STXBP2
DLC1
ZIC3
RHOA
MT-CYB
POMC
MIR95
PDCD1
MYLK
ATP6AP2
SDHB
HADHB
SGSH
CHD7
MAPT
SELE
JPX
TGFA
ETFA
CREB1
ZNF423
GLS
PCK2
SCARB1
TCF7
PEX3
UGT1A
MYCN
IRS2
GH1
CD34
MIR374A
CD274
COL1A1
CCAT2
AOX1
SOCS1
PLAU
STEAP4
PPOX
VPS33B
AGPAT2
KCTD13
GSK3B
IL12A
LINC00261
PAX2
BMP4
GCDH
BBS1
GNMT
TMEM237
VIPAS39
PWAR1
SPRY4-IT1
NORAD
LNCARSR
IFNA2
IFT140
SCARB2
HSPA5
AIFM1
PYGM
ACADS
GATA6
BBS4
PDHA1
GJB2
FGB
MLH1
CDH2
IFIH1
ANGPT1
TKT
NPTN-IT1
CTSD
GDF15
BBS9
AHI1
HAGLR
TCTN1
EPHX1
DNM1L
MTR
AHR
BCHE
HSPG2
GRN
MIR210
JAK1
MPI
LGALS3
DGKE
BANCR
MIR196A2
THPO
PGK1
TMEM138
AR
MMACHC
MED12
LYN
CASP9
CEP120
SLC25A4
SP1
AHSG
ACOX2
CYBB
MIR148B
MIR125B2
ANKS6
GDF2
HSPD1
HLA-A
CLU
BBS5
CDK2
EPHX2
APOL1
NPHS2
TREM2
PRKAR1A
C5
TP53COR1
BBS7
PDX1
PCBP2-OT1
IGFBP1
WDR35
ADAR
IKBKG
TGFBR1
ADH1B
ENPP1
SHBG
HK1
VLDLR-AS1
HOXA-AS2
CSPP1
FMO3
TNFSF10
NFKBIA
MYO5B
PRKAG2
GLDC
GPT2
CASC15
BBS10
SUOX
BCL2L1
CXCL2
PLAT
MAP3K20
TNFRSF1B
RYR1
MIR103A2
MIR1-2
KIAA0586
CDK1
LNCRNA-ATB
GALNS
GREM1
MIR483
POR
HMGCS2
TUSC7
GHRL
GAPDH
RRM2B
CPLANE1
CCDC115
ITGAM
DPYS
COQ2
ACAD9
SLC6A4
DNAH8
NR1I3
B9D2
MST1
NAGS
PCCA
SUCLG1
TXN
SOS1
LINC00665
BHMT
ABCD3
PRKDC
FALEC
OCLN
MAN2B1
APOA5
MIR124-2
RMRP
IRF5
GALC
PRPSAP1
SPTAN1
SNHG3
NDUFS4
SLC22A5
CEP41
FADD
ZEB2
NF2
DPAGT1
WT1-AS
POLGARF
F8
COX5A
UGT2B7
ETFB
MIRLET7A3
CUL3
GCKR
SAA1
ATF4
CHAT
NQO1
BBS12
CASP1
ABL1
TRA-TGC7-1
PCCB
FUCA1
CAV3
MIR320A
PNPO
SCO1
ABCG2
SDC1
MIRLET7F2
HSPA6
CEP104
MKKS
GSTT1
TRIM32
SETD2
CEACAM5
MIR199A1
GPBAR1
FLT3
MIR100HG
HBA1
SI
CBR3-AS1
LMBRD1
HBA2
EIF2S1
LDHA
UGT1A3
AFAP1-AS1
CDKL5
SCO2
SLCO1A2
DES
CNTNAP2
LYST
CECR7
CAVIN1
CCL3
ZEB2-AS1
GCH1
SCP2
PIK3CD
LINC00173
SDHD
PRL
MSH6
GFOD3P
PANK2
SMAD7
EHHADH
CLCNKB
CRB2
SKIC2
ZEB1-AS1
HOGA1
FGG
BIRC5
SNCA
HSD17B10
CKB
MAP3K5
SCN9A
DNMT1
WNK1
DLD
KNG1
UQCRB
MLXIPL
GATA4
RUNX1
SLC12A1
TERC
LINC00589
TBX1
PRECSIT
PFKM
NKILA
LINC01018
BCKDHB
DNMT3A
SERPINF1
UCHL1
NPPB
CD8A
LAMA2
SLC7A9
FTX
MYH9
NPHS1
ITCH
HOXA13
PTK2
COL2A1
ANGPT2
SAMHD1
CETP
ERCC1
CHEK2
MIR98
UNC13D
PEX7
FGF21
ALDH3A2
CDK6
PLIN1
ACTG1
CCR5
ALDH5A1
FLCN
AGER
UGT1A8
WNT4
MYD88
PIK3C2A
PDP1
GFM1
MIR34C
TET2
ARC
CTC1
EGILA
DPM1
LINC00926
CERNA2
DYSF
MFN2
MIR26A2
TPMT
ASXL1
COL4A3
PIK3CB
NR2F1-AS1
KIF7
FCGR2A
HDAC1
SNORD15A
SLC39A8
PIGA
ACTA2-AS1
MMAA
ADH1C
VCP
LINC01138
LRP2
FGF23
CCR2
BTK
FGF19
ATP6AP1
NAF1
TFRC
GALK1
POU5F1
PTENP1
POU2AF1
ACTN4
EDNRA
PSEN1
CASC11
CDH4
COL5A1
GNPTAB
ALG6
GOLM1
ERCC4
STX11
NSD1
TYROBP
MBP
CXCL9
IL33
TRPC6
CDKN1C
SOX17
CYP19A1
GATA1
CTSA
TYMS
AGA
RPS6KA3
CEL
SUMF1
UGT1A10
SLCO2B1
MIRLET7A2
HTR2A-AS1
SERPINA6
E2F1
TK2
NOTCH3
CTH
CEACAM3
MMP3
MT-CO3
UROS
ERCC6
PDSS2
L1CAM
KIF12
ABCC6
NDUFS1
SLC35C1
TRAPPC11
PARK7
UPB1
HGSNAT
DPP4
IL1R1
HHEX
ABCC4
KMT2D
PRDX1
AKT3
LRPPRC
SDHA
DKC1
CD40
TNNT2
KCNJ1
ALDH7A1
STAT2
SLC12A3
PEPD
COQ9
LOC114803470
GPHN
TLR3
SLC51A
OPA1
ACE2
CIDEC
PDIA3P1
SOX10
SETBP1
GYS1
SOX4
ALAS2
GNS
IARS1
SC5D
EYA1
IL6ST
SKIC3
MIR192
FER1L4
NNT-AS1
C4A
MIR181B2
GATM
MT-TL1
HLA-DQA1
RANBP2
MPL
CYB5A
ANGPTL3
IFNB1
MCCC1
PPT1
SOX9
CDR1
TGFB3
BECN1
FGFR4
MCL1
TNFSF15
DHFR
SCD
CSF1R
TIMM8A
PRKN
TNPO3
PLAUR
TMEM165
AUH
FOXA1
RMND1
LTBP4
AQP1
HEXA
SLC16A2
MEN1
MAPKAPK5-AS1
IL5
IL18BP
CTSB
HAVCR2
EPAS1
ACACA
TPP1
LOX
PRKCA
TNFRSF11B
MB
RLBP1
ACVR2B
ERCC2
FANCI
CHI3L1
SLC10A2
MIR328
PAX8
HEXB
MIR424
CYBA
F11
PRTN3
IL22
MAPK10
BCOR
GRIN1
IKZF1
IL2RB
BLVRA
GSR
LPIN1
GAS5-AS1
CD81
LIPE
B4GALT1
TARDBP
PTK2B
MAT2A
ANXA5
GGCX
SOX2
MMP7
APOH
HBEGF
FKRP
NHLRC1
AIRE
SULT1A3
IFNL3
MIAT
ANOS1
TNFAIP3
MTM1
FBXW7
TRIM37
MCCC2
TAFAZZIN
DDOST
RNASEH2B
PPARD
PROM1
THBS1
LMNB1
PECAM1
RGN
NCAM1
EIF2AK2
MIR1225
OPA3
PON1
MOGS
CEP83
NDUFV1
RAB27A
CDC42
PKM
ADNP
DDX3X
G6PC3
IL7R
MIR361
TTC8
BCR
KLF6
RAG2
HSD11B1
IL13
IL7
SLC35A2
MTRR
CYP1B1
QDPR
AVPR2
GLIS2
CDK5
GATA2
LRP1
PEMT
BICC1
RBM10
TRPV1
TRAP1
ARSB
WNT1
SLC22A1
TCIRG1
FGL1
PROC
APOC2
SRCAP
NODAL
CLEC4M
AURKA
DHDDS
PTPN22
MCOLN1
SPG7
STAT5B
ALG1
DOCK8
CDKN2B
AMBP
BSG
RELN
PHGDH
SORD
SLC25A1
NPM1
GRIN2B
NGFR
COL4A5
BRD4
DNMT3B
ADA2
MMP14
BCKDHA
CYP2C8
DNASE1L3
LTF
TTC19
VPS13A
CHKB-CPT1B
PODXL
MAGT1
CSF2
NR4A1
SLC25A22
ONECUT2
NDUFAF5
GLIS3
MOCS2
ACVR1
AVP
KLF1
PLP1
NDUFS7
BGLAP
KCNJ10
ALG13
HPX
KCNN4
TWIST1
SURF1
EDNRB
GNRH1
KITLG
USP18
SLC25A3
GNAQ
ADSL
AHCY
GK
GC
SLC26A1
SYNGAP1
PTS
SCN5A
NCF2
CD55
SELL
TAB2
LOC106627981
TIMP3
CLCNKA
SLC7A7
STAR
SPG11
HSPA8
IFNGR1
ARX
PDHX
CALM2
LECT2
PNP
MAP2K2
PTPN3
CHD1L
IL15
COG2
SLC46A1
HSP90AA1
SLPI
RTN4
CD27
FOXO3
SLC51B
FOLR1
SLC19A3
IFT56
ITGB2
F13A1
CHKA
EMSLR
RNASEH2C
AQP2
ERBB3
FAM13A
CES2
PRKACA
VLDLR
MT-ND1
GLI2
SPIB
ARID1B
APTX
KCNJ5
MIR193A
GSTA2
COL18A1
SCN1B
CCR1
PROX1
DLG4
ACSL4
TMEM70
KCNB1
FKTN
CX3CR1
EPM2A
CSF1
KMT2A
SLC6A8
XRCC1
SLC4A1
MMEL1
POMGNT1
SMARCAL1
HDAC9
ALDH1A1
TALDO1
COL4A4
ALG2
IFNAR2
PDE6D
DDC
MIR296
COG4
NINJ1
FBXL4
PRKD1
LBP
GRIP1
DNAJC19
KRT5
COG6
NOX4
ABCG1
CACNA1A
GPI
JAK3
LYZ
INF2
DOLK
DNM1
KRIT1
IL2RG
RNASEH2A
CD19
NAMPT
AXIN2
FHL1
ALDH9A1
DAG1
SNAI1
GPD1
NR0B2
PNKP
EFEMP2
MKI67
TNFRSF10B
NADK2
SYK
SREBF2
ATP5F1A
WFS1
MRPL44
ANXA2
CD2AP
CCNA2
RAI1
RARB
ALG12
FOXRED1
MLC1
MBOAT7
ATP5F1E
CASK
FA2H
COG7
TGIF1
MIR149
TCF7L2
CCL20
CXCL1
APTR
RPGRIP1
DMXL2
PPP1CB
VKORC1
LPIN2
MIR373
HLCS
POMT1
MYL2
MIR204
CYP27B1
DPM3
BCL11A
PAX6
CHD4
OAT
TPI1
SULT2A1
TSFM
SUFU
PRPS1
AQP4
CRH
ARL6
GSS
CYP17A1
CACNA1C
SLC1A2
CSTB
GSTA1
ASGR2
DSP
MOCS1
MDK
KDM6A
APOA2
TRPV4
PTF1A
CHGA
JUP
APEX1
DRD2
SLC11A1
CYP24A1
NEUROD1
KLF11
PPP2R1A
CALM1
UQCRC2
FDFT1
TJP1
BMPR2
COL4A2
AKR1B1
PLA2G2A
DYNC1H1
CAD
MCM4
WAS
TEK
PRKAA1
TRAF6
UGT2B4
HGD
MAN1B1
ELAVL1
SLC9A3
PGM3
MIR197
ERCC8
HBG2
ABCC1
TLR9
SCN1A
CLCN5
GNA11
ACSF3
ELMOD2
BSND
ATR
KATNIP
KCNH1
SMC1A
RASA1
TRIM8
FTCD
PCBD1
BLK
ASGR1
RAG1
SUCLA2
AFG3L2
CXCR3
EFTUD2
GHR
ODC1
SLC16A1
JARID2
DGAT2
NKX2-5
MIR326
COG5
ITPA
CCDC47
COG8
ITGA3
NDUFAF2
NDUFA1
MIR211
SRD5A3
RUNX2
SGK1
BBIP1
POMT2
UBE3A
DLK1
LCT
ALG3
CFHR3
KEAP1
CKM
ADRB2
C4B
CACNA2D1
CLN3
SIX5
CFB
FBLN5
LSR
MMAB
WRN
FABP2
DUSP1
PIK3R2
CIITA
KCNQ1
FGF7
SDHC
CD163
LIF
NAA10
APPL1
IDO1
FOXG1
PINK1
CTNNA1
RPS27A
CD47
SPTBN1
MT-CO1
COX6B1
HES1
ADM
PPP2CA
MDH2
MAPKBP1
PDHB
OSM
MIR335
MGMT
SHANK3
TMEM107
RAD21
STX1A
KRT14
GCLC
SIK1
MGAT3-AS1
SGCB
TMPRSS6
UCN
MIR15B
AGK
RECQL4
CFLAR
NAGA
NPY
GCG
SLC3A1
GP1BA
GNB1
SH2D1A
BLVRB
NDUFV2
TTC7A
EBP
MILR1
KARS1
SLC22A7
SOST
SATB2
GJA5
SLC5A1
IVD
FOXP2
SFTA3
CYS1
SLC6A3
FUS
WNT5A
SLC2A10
HSPA1A
LPA
SCN4A
ABCC9
GAL
SCN2A
FBN2
SH2B3
GRIN2A
XPNPEP3
CD68
GCSH
MIR144
NKX2-1
HDAC4
TFAP2A
NDUFS2
MAPK9
CLPB
TNXB
AP3B1
TRE-TTC3-1
FRAS1
MYH11
FLNC
COX8A
XPC
CD59
EPRS1
ENO1
MLYCD
DBT
LYRM7
HCFC1
CHUK
PRKCZ
ACP5
ERCC3
LIPT1
COQ8B
TRAF2
RTEL1
CTSK
CCL4
NDUFAF1
KCND3
VRK1
NDUFS6
C1S
DHCR24
COQ6
UGT1A5
CPT1B
AAAS
AASS
SOS2
NDUFS3
PLCE1
DBH
NDUFB9
SNAI2
LZTFL1
NES
PRNP
NTN1
PRDX5
TNFSF13B
HLA-C
GYG1
FDX2
CNR1
COA8
PROP1
CFHR1
ATP6V0A2
ATP1A1
CSNK2A1
LRAT
ZBTB20
CRYAB
PTX3
HAX1
NIPBL
NEUROG3
KMT2C
DICER1
TTPA
SCN8A
ERN1
RARS1
COX6A1
ABCA12
SLC22A12
SLC1A3
SNORD118
SFTPC
SPINT2
PAX5
CD80
PHYH
ECHS1
GZMB
PSMB8
S100A9
RARA
GHRH
CXCR2
DKK1
YARS2
FTO
IL11
ALDH4A1
SLC2A9
VPS13B
UMPS
PDPN
ATP13A2
TINF2
HDAC6
SEMA4D
ABAT
GPR35
AKR1C4
POSTN
SCN11A
REG3A
ITGB3
FLVCR1
BID
AMT
CCNE1
MAOB
ACHE
CCNB1
DNASE1
USP9X
AARS1
PRKG1
PRKAA2
BCL6
HOXA1
EIF2B1
IL3
XPA
ITIH4
IQSEC2
GFPT1
TG
PCSK1
BAK1
USP7
ATP4A
TNFRSF11A
MID1
EPOR
SAR1B
H6PD
DGAT1
SMARCA2
PAX4
TNFSF12
MIR24-1
NONO
CISH
L2HGDH
BGN
[truncated: 3,071 more rows]

## Sheet: Targets of Hexaconazole
TRPV3
PPARG
PPARD
NR3C1
THRB
ESR1
NFE2L2
KCNA5
KCNE1
ALOX5
TNNC1
ABCC9
NR3C2
PGR
JAK1
JAK2
PARP1
PTAFR
MAP3K14
MAPK1
TYMS
LTA4H
CYP19A1
LRRK2
VDR
EGFR
PSEN2
PPOX
ACPP
MAPK8
AKR1B1
DUT
PIM1
MCL1
PIM3
PYGL
STK3
STK26
CCNE2
PTK2
KDR
UTS2R
MAPK14
PTGS2
MAPK10
CA2
CA1
CA6
CA4
CCNB3
GSK3B
CDK1
EPHX1
CNR1
HSD11B1
MDM2
PTGS1
TERT
CDK9
JAK3
CES1
CES2
TYK2
FGFR2
NPY5R
CASP1
CASR
MMP1
FLT3
CDK2
GRM5
FNTA
GABRB3
GABRA2
KCNJ11
PGGT1B
ABCB1
NQO2
MTNR1A
MTNR1B
AKR1C3
AURKA
EIF2AK1
IGF1R
INSR
FGFR1
CYP11B1
CYP11B2
PIK3CA
PDE10A
DHODH
CHEK1
HRH3
BRD4
CDK5R1
CASP3
CASP6
CASP7
ALOX12
CASP8
NR4A1
CCNA1
CDK5
FNTB
GABRA3
GABRG2
KCNQ1
PSENEN
TNNT2
NCSTN
CCNB1
CCNA2
CCNE1
GABRA1
GABRA5
TNNI3
APH1A
CCNB2
PSEN1
APH1B

## Sheet: Targets of Propiconazole
TARDBP
HSPA5
RXRA
PPARD
AHR
VDR
PPARG
CBX1
GNAS
POLI
TP53
NR1H4
GLP1R
TDP1
CYP3A4
THRB
HSP90AA1
NFE2L2
ALOX15B
DRD3
MPO
ALOX5
ADAMTS5
ADAMTS4
MMP13
MMP2
ADRA2A
ADRA2C
ADRA2B
AKR1B1
SLC6A4
SLC6A3

## Sheet: Targets of Prothioconazole
PPARD
PPARG
NR3C1
THRB
ESR1
NFE2L2
HSD17B2
AR
NR3C2
PGR
TRPV3
IDO1
PTGS1
PTGS2
SIGMAR1
JAK1
JAK2
PARP1
ABCC9
ALOX5
KCNA5
KCNE1
PSEN2
SCN5A
SCN9A
LRRK2
STK3
STK26
TYMS
MAPK1
HSD11B1
LTA4H
CHRM4
VDR
EGFR
CHRM2
OPRM1
OPRD1
OPRK1
TNNC1
MAPK8
BRD4
CYP17A1
PPOX
MDM2
ADRA2C
CCNE2
PTK2
KDR
BRD2
BRD3
MCL1
PTAFR
NPY5R
AKR1B1
PIM1
DUT
PIM3
FLT3
CDK2
TYK2
TTK
ERBB2
HRH2
CHRM5
CHRM1
HTR2A
ADRA1B
CHRM3
HTR7
FNTA
PGGT1B
CYP11B1
CYP11B2
IGF1R
INSR
CDK9
FGFR1
PER2
TSPO
NQO2
CLK4
PIM2
MAPK10
KCNA3
MAP3K14
EIF4H
PABPC1
TRPV1
EIF2AK1
CCNB3
GSK3B
CDK1
HCRTR2
HCRTR1
FGFR2
LIPA
IMPDH2
PYGL
CTSK
CTSS
MAPK14
BCHE
ACHE
CCNA1
FNTB
KCNQ1
PSENEN
TNNT2
CCNA2
CCNB1
CCNE1
NCSTN
TNNI3
APH1A
CCNB2
PSEN1
APH1B
