# Supplementary material for: Efficient analysis of the toxicity and mechanisms of Hexaconazole and two other triazole fungicides: insights from integrated network toxicology, molecular docking and bioinformatics data
Source: Research Square preprint supplement (doi:10.21203/rs.3.rs-5318182/v1), 2024-10-29
Supplement: Supplementary file 2 [file 3cabaef7b2db6348bf7ae6f2.docx]

**Supplementary Contents**

**Table S1.** Core targets screened from PPI network of Hexaconazole induced brain injury.

| Gene | Degree | Betweenness centrality | Closeness centrality |
| --- | --- | --- | --- |
| CASP3 | 49 | 778.50073 | 0.65 |
| EGFR | 48 | 528.23083 | 0.6453901 |
| ESR1 | 42 | 652.4218 | 0.61904764 |
| PTGS2 | 38 | 883.8394 | 0.6066667 |
| PARP1 | 38 | 153.48102 | 0.59090906 |
| GSK3B | 38 | 650.6574 | 0.6107383 |
| MDM2 | 38 | 145.77151 | 0.57961786 |
| PIK3CA | 34 | 126.98434 | 0.55487806 |
| PPARG | 34 | 693.8855 | 0.5833333 |
| MAPK1 | 33 | 225.46667 | 0.5481928 |
| CDK2 | 33 | 190.56013 | 0.572327 |
| MCL1 | 33 | 83.96727 | 0.5481928 |
| MAPK14 | 32 | 232.53363 | 0.5449102 |
| JAK2 | 29 | 132.60043 | 0.5352941 |
| CASP8 | 29 | 50.401382 | 0.53216374 |
| IGF1R | 29 | 76.365105 | 0.55151516 |
| MAPK8 | 28 | 125.848915 | 0.5260116 |
| KDR | 27 | 311.4949 | 0.5449102 |
| CCNA2 | 26 | 39.62318 | 0.5260116 |
| CDK1 | 25 | 66.71883 | 0.51123595 |
| CCNE1 | 25 | 39.991478 | 0.5083799 |
| PGR | 25 | 55.374775 | 0.5229885 |
| TERT | 24 | 114.810875 | 0.52 |
| JAK1 | 19 | 52.750267 | 0.486631 |
| PTK2 | 19 | 76.311356 | 0.4918919 |
| NR3C1 | 19 | 166.39479 | 0.51123595 |
| CDK5 | 18 | 396.17572 | 0.50555557 |
| CASP1 | 17 | 39.84914 | 0.5 |
| FGFR1 | 16 | 49.11912 | 0.47395834 |
| CYP19A1 | 16 | 328.45624 | 0.49726775 |
| PTGS1 | 16 | 92.336266 | 0.49456522 |
| ABCB1 | 15 | 362.8011 | 0.5 |
| INSR | 14 | 61.959103 | 0.486631 |
| GRM5 | 11 | 747.41815 | 0.45728642 |
| PSEN1 | 11 | 120.93609 | 0.45959595 |

**Table S2.** Core targets screened from PPI network of Hexaconazole induced liver injury.

| Gene | Degree | Betweenness centrality | Closeness centrality |
| --- | --- | --- | --- |
| CASP3 | 49 | 896.86176 | 0.65217394 |
| EGFR | 48 | 600.9673 | 0.64285713 |
| ESR1 | 41 | 586.1772 | 0.62068963 |
| MDM2 | 39 | 226.68744 | 0.5882353 |
| PARP1 | 38 | 189.31651 | 0.5960265 |
| PTGS2 | 37 | 930.4715 | 0.6081081 |
| GSK3B | 36 | 492.5757 | 0.59210527 |
| MCL1 | 34 | 143.86853 | 0.5521472 |
| PPARG | 33 | 549.57684 | 0.5732484 |
| MAPK14 | 32 | 233.77612 | 0.54545456 |
| MAPK1 | 32 | 181.69337 | 0.54545456 |
| PIK3CA | 32 | 84.41076 | 0.5521472 |
| CDK2 | 31 | 116.00084 | 0.5590062 |
| JAK2 | 29 | 129.92705 | 0.5325444 |
| CASP8 | 29 | 79.67809 | 0.5263158 |
| IGF1R | 29 | 89.826294 | 0.5590062 |
| MAPK8 | 28 | 128.37761 | 0.5263158 |
| KDR | 27 | 375.42206 | 0.5487805 |
| CCNA2 | 26 | 41.72381 | 0.51724136 |
| CHEK1 | 26 | 39.427 | 0.5084746 |
| CDK1 | 24 | 52.134247 | 0.5 |
| PGR | 24 | 58.38379 | 0.5263158 |
| TERT | 23 | 101.80599 | 0.505618 |
| NR3C1 | 20 | 237.6252 | 0.51724136 |
| JAK1 | 19 | 55.18536 | 0.48913044 |
| PTK2 | 18 | 72.42666 | 0.48913044 |
| CYP19A1 | 18 | 542.4128 | 0.505618 |
| FGFR1 | 16 | 52.05855 | 0.47619048 |
| PTGS1 | 16 | 93.88039 | 0.4945055 |
| ABCB1 | 15 | 536.9082 | 0.5084746 |
| INSR | 14 | 77.82265 | 0.4864865 |
| TYMS | 14 | 192.95251 | 0.4522613 |
| CDK5 | 13 | 79.84337 | 0.48128343 |
| KCNJ11 | 4 | 496.38333 | 0.065 |

**Table S3.** Core targets screened from PPI network of Propiconazole induced brain injury.

| Gene | Degree | Betweenness centrality | Closeness centrality |
| --- | --- | --- | --- |
| PPARG | 15 | 190.37302 | 0.627907 |
| TP53 | 12 | 175.19286 | 0.6 |
| HSP90AA1 | 9 | 122.07143 | 0.5192308 |
| NR1H4 | 8 | 36.80873 | 0.5192308 |
| NFE2L2 | 8 | 20.892857 | 0.48214287 |
| MMP2 | 8 | 73.80476 | 0.5 |
| CYP3A4 | 6 | 99.89921 | 0.5 |
| HSPA5 | 5 | 30.428572 | 0.46551725 |
| MMP13 | 5 | 34.866665 | 0.45 |

**Table S4.** Core targets screened from PPI network of Propiconazole induced liver injury.

| Gene | Degree | Betweenness centrality | Closeness centrality |
| --- | --- | --- | --- |
| PPARG | 15 | 148.91905 | 0.6764706 |
| TP53 | 11 | 113.75238 | 0.6216216 |
| HSP90AA1 | 9 | 76.99524 | 0.53488374 |
| NFE2L2 | 8 | 17.823809 | 0.51111114 |
| NR1H4 | 7 | 18.657143 | 0.53488374 |
| MMP2 | 7 | 35.985714 | 0.51111114 |
| CYP3A4 | 6 | 97.209526 | 0.53488374 |
| HSPA5 | 5 | 13.771428 | 0.47916666 |

**Table S5.** Core targets screened from PPI network of Prothioconazole induced brain injury.

| Gene | Degree | Betweenness centrality | Closeness centrality |
| --- | --- | --- | --- |
| EGFR | 41 | 717.7052 | 0.65833336 |
| ESR1 | 37 | 593.7533 | 0.6171875 |
| PTGS2 | 36 | 593.3438 | 0.6124031 |
| MDM2 | 33 | 134.60748 | 0.57246375 |
| GSK3B | 33 | 518.95526 | 0.6076923 |
| PPARG | 32 | 831.14294 | 0.6124031 |
| PARP1 | 31 | 169.65178 | 0.5642857 |
| ERBB2 | 31 | 91.884674 | 0.556338 |
| MAPK1 | 30 | 257.36285 | 0.56028366 |
| MAPK14 | 25 | 130.90454 | 0.5410959 |
| MCL1 | 25 | 57.298096 | 0.5197368 |
| IGF1R | 25 | 41.86571 | 0.5337838 |
| JAK2 | 24 | 101.02526 | 0.5302013 |
| PGR | 24 | 79.32791 | 0.512987 |
| CDK2 | 24 | 106.44074 | 0.5302013 |
| AR | 23 | 76.63978 | 0.52666664 |
| MAPK8 | 21 | 60.374058 | 0.512987 |
| KDR | 21 | 96.82636 | 0.5163399 |
| NR3C1 | 21 | 323.10812 | 0.53741497 |
| CDK1 | 19 | 75.886986 | 0.50318474 |
| NFE2L2 | 18 | 42.054836 | 0.5197368 |
| PTK2 | 16 | 36.040115 | 0.48466256 |
| INSR | 13 | 51.70372 | 0.5 |
| PTGS1 | 12 | 52.828217 | 0.48765433 |
| PSEN1 | 11 | 251.99176 | 0.45930234 |
| ACHE | 10 | 450.13348 | 0.49375 |

**Table S6.** Core targets screened from PPI network of Prothioconazole induced liver injury.

| Gene | Degree | Betweenness centrality | Closeness centrality |
| --- | --- | --- | --- |
| EGFR | 42 | 732.14996 | 0.6880734 |
| ESR1 | 36 | 535.745 | 0.65217394 |
| MDM2 | 34 | 201.89098 | 0.6147541 |
| PTGS2 | 34 | 392.60632 | 0.6198347 |
| PARP1 | 32 | 195.4677 | 0.5905512 |
| GSK3B | 32 | 369.02292 | 0.6097561 |
| PPARG | 32 | 771.53784 | 0.625 |
| ERBB2 | 30 | 89.000595 | 0.5813953 |
| MAPK1 | 29 | 180.62964 | 0.5813953 |
| MCL1 | 26 | 214.2913 | 0.54744524 |
| MAPK14 | 25 | 135.03868 | 0.57251906 |
| IGF1R | 25 | 42.68109 | 0.5597015 |
| JAK2 | 24 | 101.40817 | 0.5555556 |
| AR | 24 | 114.33507 | 0.5514706 |
| PGR | 23 | 80.10132 | 0.53571427 |
| CDK2 | 23 | 102.04307 | 0.5514706 |
| NR3C1 | 22 | 375.8322 | 0.5514706 |
| MAPK8 | 21 | 63.393337 | 0.53956836 |
| KDR | 21 | 172.14423 | 0.54744524 |
| CDK1 | 18 | 43.40159 | 0.51369864 |
| PTK2 | 15 | 33.793945 | 0.5033557 |
| JAK1 | 15 | 33.486046 | 0.48701298 |
| BRD4 | 15 | 33.30795 | 0.49668875 |
| INSR | 13 | 89.3907 | 0.52816904 |
| PTGS1 | 12 | 47.616436 | 0.5 |
| NR3C2 | 10 | 47.847145 | 0.46583852 |

**
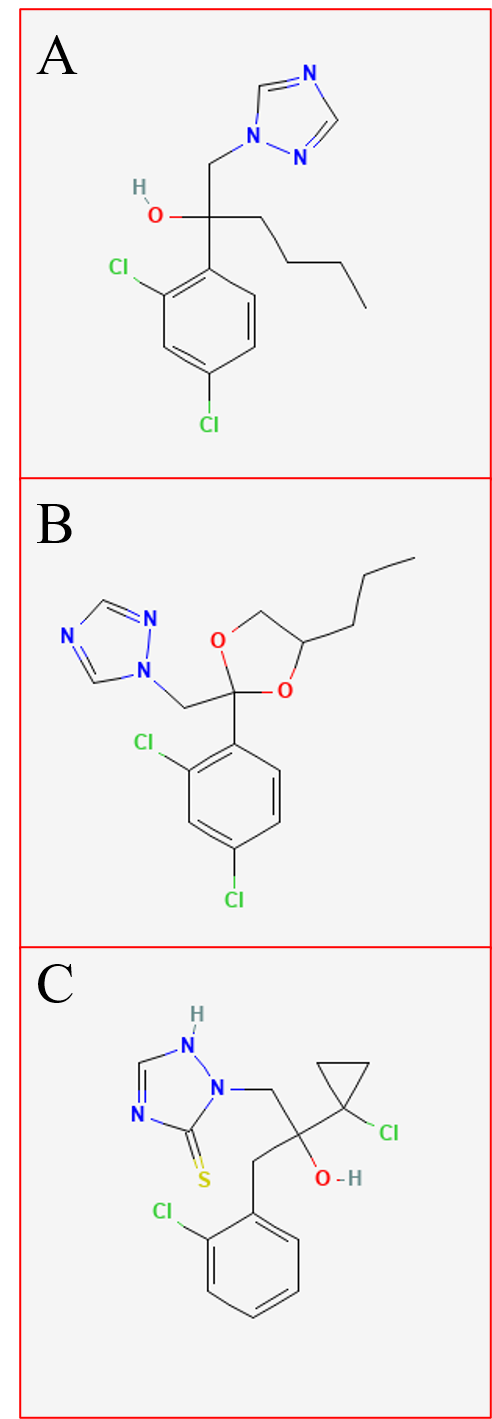
**

**Fig. S1.** Structure of Hexaconazole (A), Propiconazole (B) and Prothioconazole (C). The Image sourced from the PubChem website (<https://pubchem.ncbi.nlm.nih.gov/>).


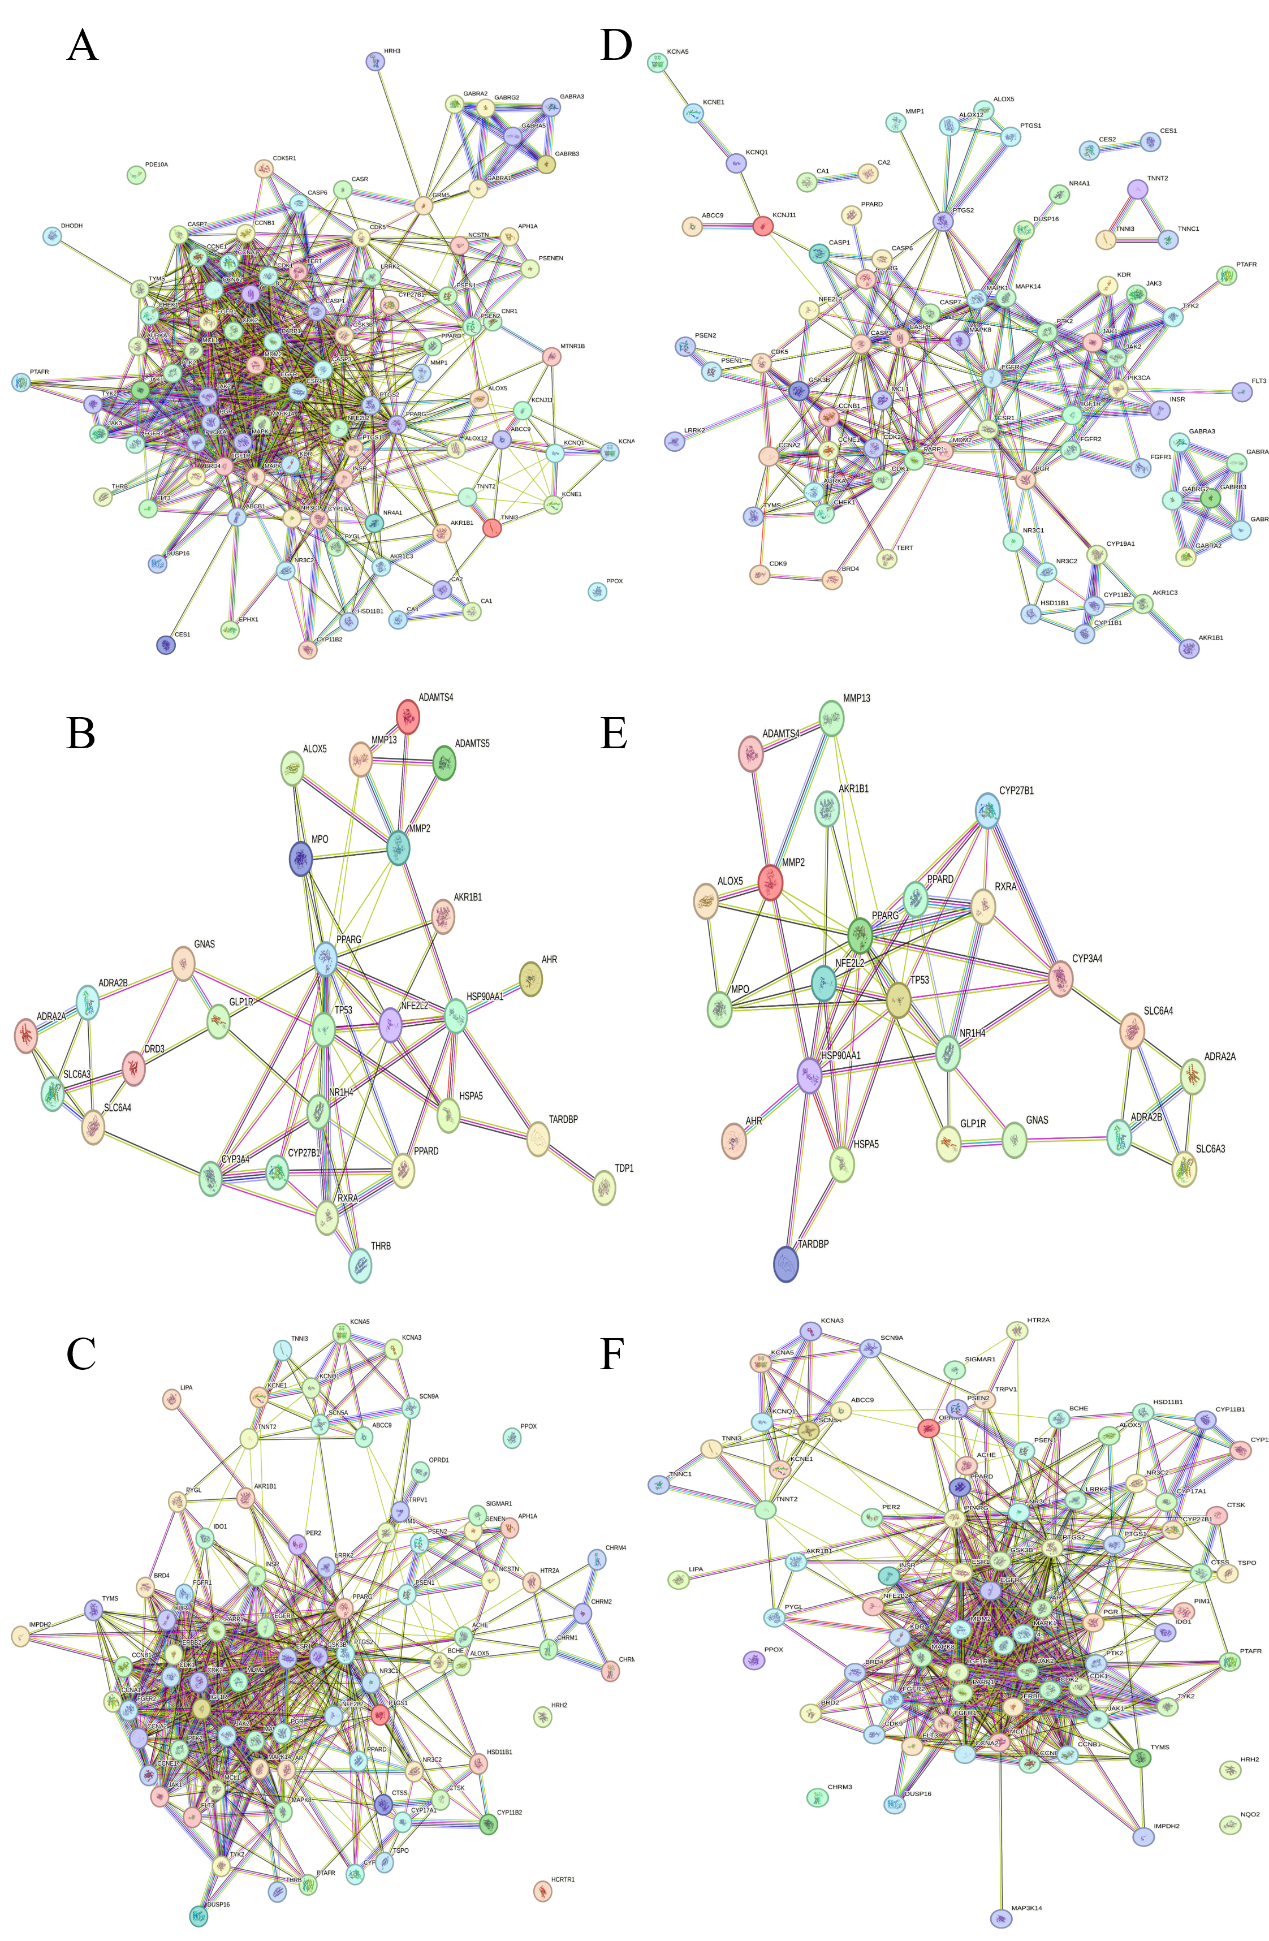


**Fig. S2.** PPI network diagram of brain injury induced by Hexaconazole (A), Propiconazole (B) and Prothioconazole (C); PPI network diagram of liver injury induced by Hexaconazole (D), Propiconazole (E) and Prothioconazole (F).


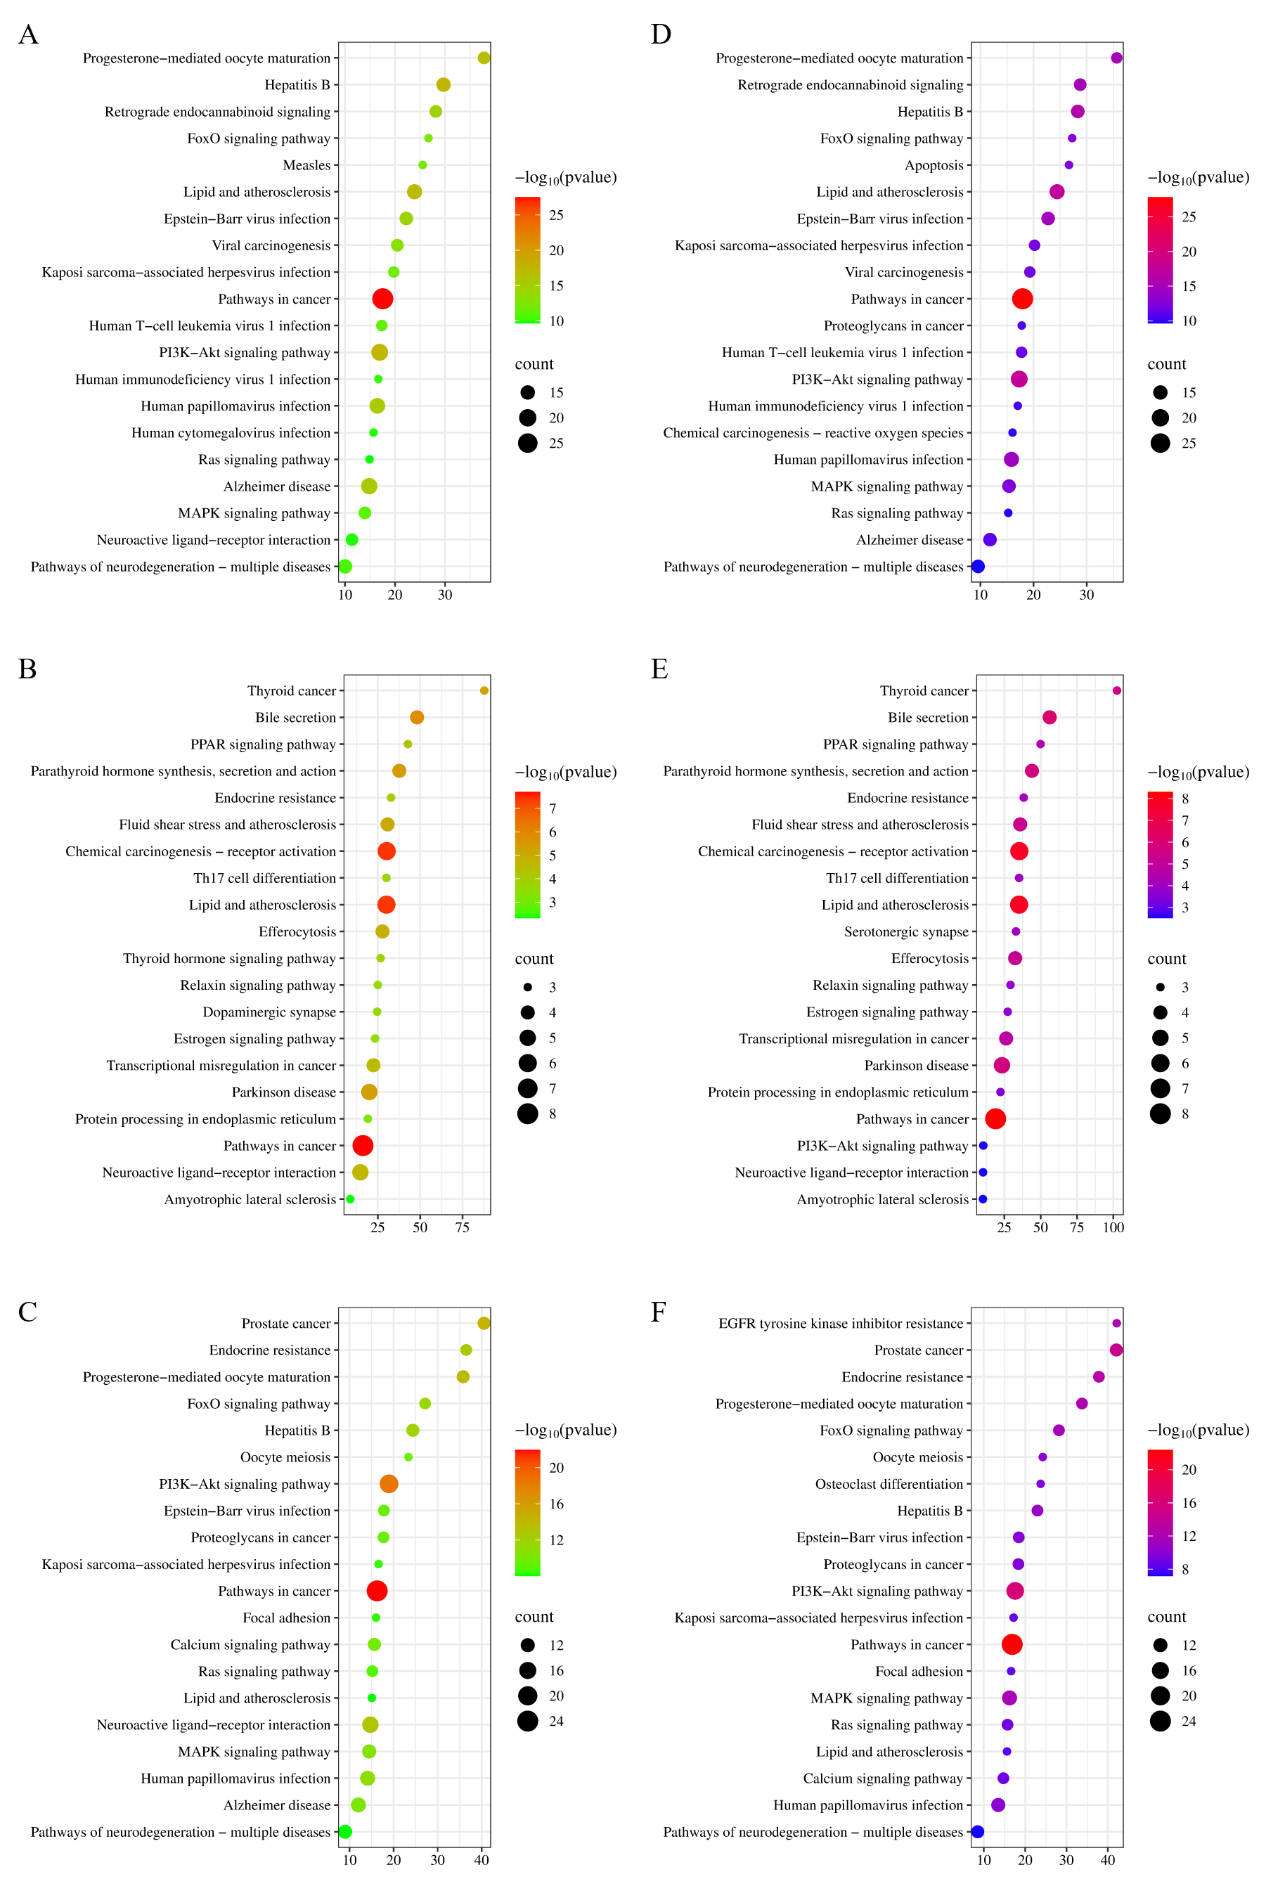


**Fig. S3.** KEGG enrichment analysis of the potential targets (top 20) of brain injury induced by Hexaconazole (A), Propiconazole (B) and Prothioconazole (C); KEGG enrichment analysis of the potential targets (top 20) of liver injury induced by Hexaconazole (D), Propiconazole (E) and Prothioconazole (F).


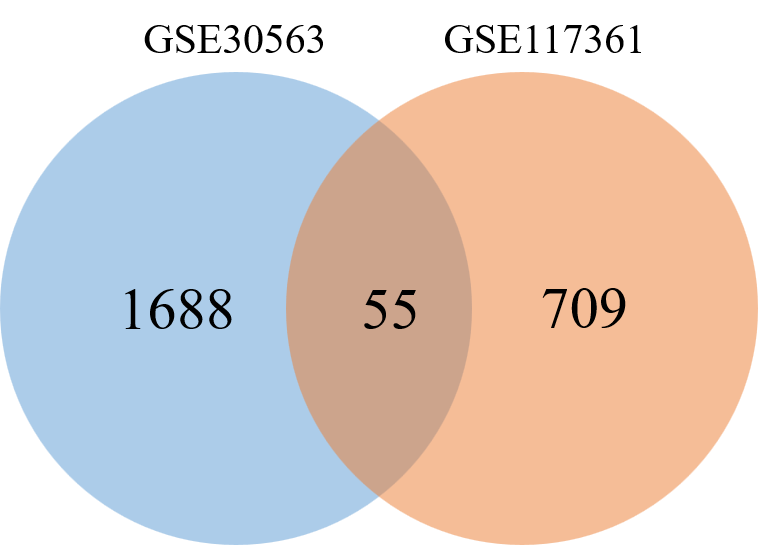


**Fig. S4.** Venn map of differentially expressed genes (*P* < 0.005) from the GSE30563 and GSE117361 data sets.


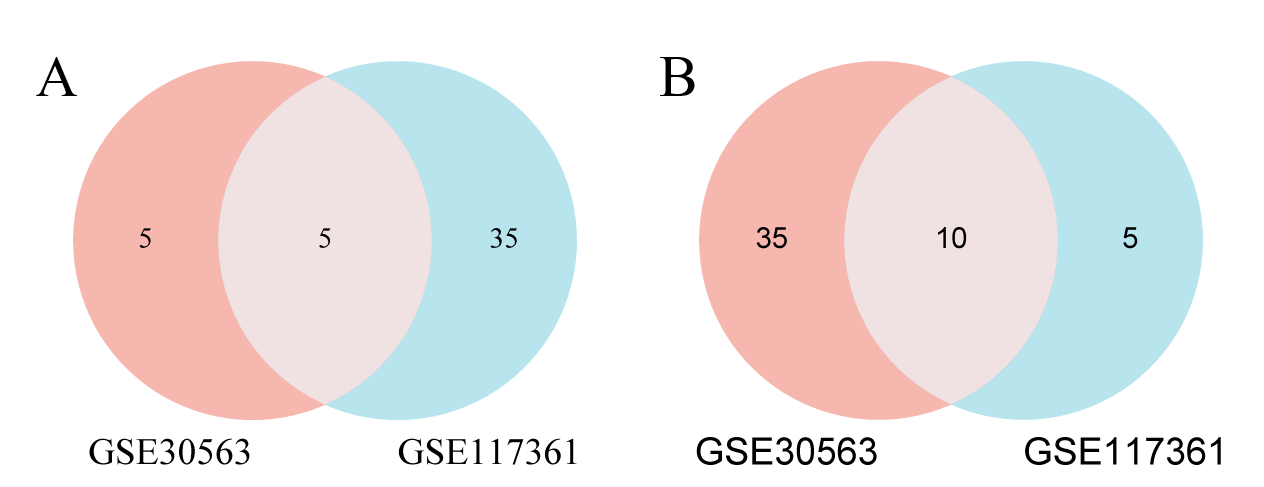


**Fig. S5.** A. Venn map of up-regulated genes from the GSE30563 and GSE117361 data sets. B. Venn map of down-regulated genes from the GSE30563 and GSE117361 data sets.


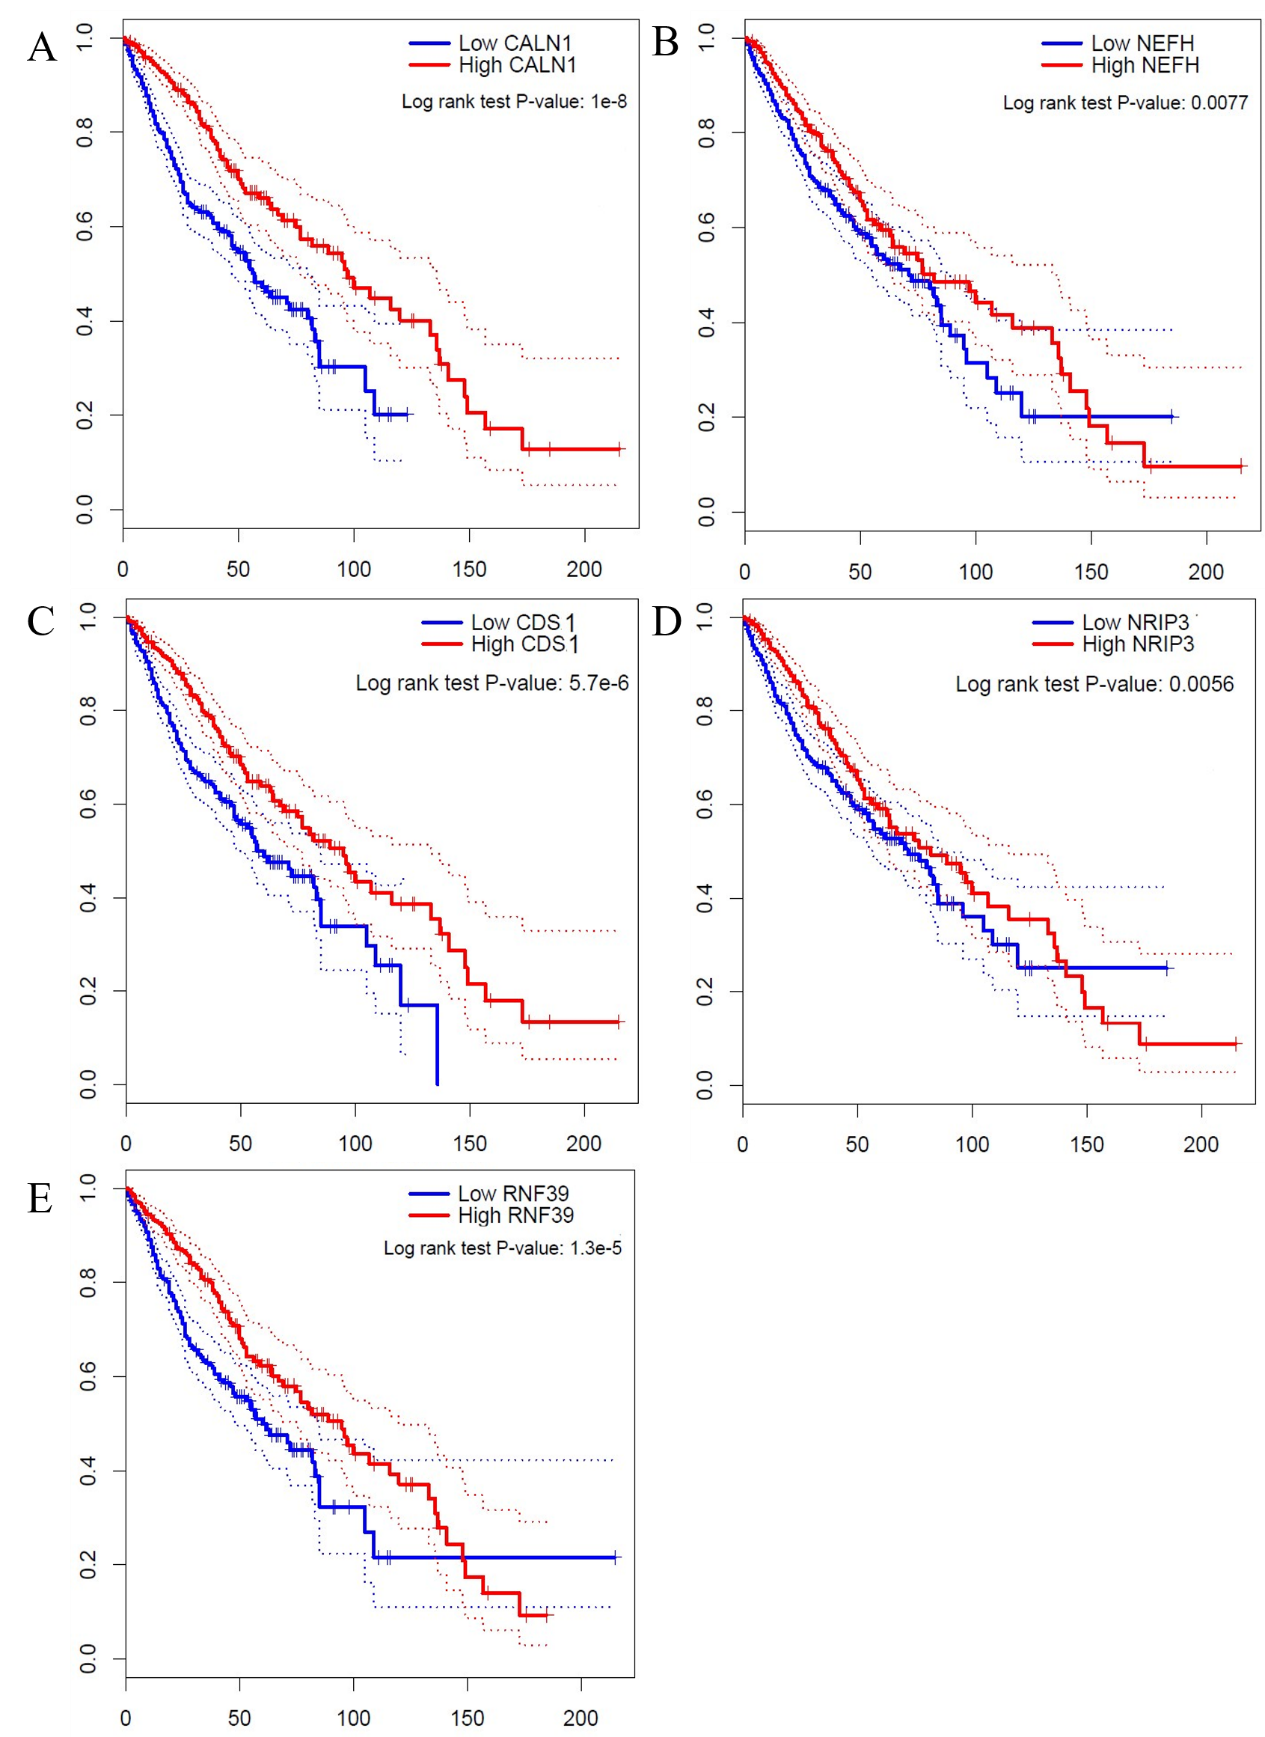


**Fig. S6.** Survival analysis of the top five jointly upregulated genes expressed in brain and liver cancer patients.
