# Supplementary material for: Efficient analysis of the toxicity and mechanisms of Hexaconazole and two other triazole fungicides: insights from integrated network toxicology, molecular docking and bioinformatics data
Source: Research Square preprint supplement (doi:10.21203/rs.3.rs-5318182/v1), 2024-10-29
Supplement: Supplementary file 3 [file 46de700c4f83299ae831f7d4.xlsx]

## Sheet: Sheet1
Hexaconazole and Liver injury：
number of nodes:	92
number of edges:	233
average node degree:	5.07
avg. local clustering coefficient:	0.542
expected number of edges:	66
PPI enrichment p-value:	< 1.0e-16
Hexaconazole and Brain injury：
number of nodes:	94
number of edges:	701
average node degree:	14.9
avg. local clustering coefficient:	0.602
expected number of edges:	247
PPI enrichment p-value:	< 1.0e-16
Propiconazole and Liver injury：
number of nodes:	24
number of edges:	62
average node degree:	5.17
avg. local clustering coefficient:	0.646
expected number of edges:	24
PPI enrichment p-value:	5.65e-11
Propiconazole and Brain injury：
number of nodes:	28
number of edges:	72
average node degree:	5.14
avg. local clustering coefficient:	0.596
expected number of edges:	26
PPI enrichment p-value:	9.98e-14
Prothioconazole and Liver injury:
number of nodes:	80
number of edges:	499
average node degree:	12.5
avg. local clustering coefficient:	0.576
expected number of edges:	194
PPI enrichment p-value:	< 1.0e-16
Prothioconazole and Brain injury:
number of nodes:	83
number of edges:	516
average node degree:	12.4
avg. local clustering coefficient:	0.562
expected number of edges:	199
PPI enrichment p-value:	< 1.0e-16
