# Supplementary material for: Efficient analysis of the toxicity and mechanisms of Hexaconazole and two other triazole fungicides: insights from integrated network toxicology, molecular docking and bioinformatics data
Source: Research Square preprint supplement (doi:10.21203/rs.3.rs-5318182/v1), 2024-10-29
Supplement: Supplementary file 4 [file 67f37d2fb6b034db162ca922.xlsx]

## Sheet: DEGs of Brain tumors
adj.P.Val	logFC	Gene.symbol
8.7135e-09	6.50543	VSNL1
8.9251e-08	4.35224	NAPB
4.08093e-07	6.50493	SYT1
1.83294e-07	8.18359	CPEB3
3.2128e-07	9.60534	UNC13C
1.46129e-06	2.78156	STXBP1
2.34017e-06	-4.40002	GPNMB
2.80532e-06	4.86103	PPP2R2C
3.72159e-06	2.57221	NME7
2.44737e-06	4.5691	PACSIN1
4.74951e-06	-3.58768	GPX3
3.25493e-06	5.52595	DNM1
4.59503e-06	4.13055	UBE2QL1
4.80935e-06	3.02302	GLS
4.78888e-06	4.07074	CA11
3.52223e-06	4.46572	PCLO
3.10574e-06	6.25908	GABRB2
2.35982e-06	5.37379	JPH3
6.44898e-06	3.89046	ENO2
5.54855e-06	4.19089	CAMK2B
5.33253e-06	4.26157	SYN1
4.15419e-06	5.44243	SYT13
7.66866e-06	4.41674	SLC17A7
9.45786e-06	3.93907	ARHGEF7
9.80765e-06	5.20722	MICAL2
8.70595e-06	3.98709	SH3GL3
1.1385e-05	3.54305	NEFM
1.41618e-05	4.73074	DIRAS2
1.44936e-05	4.42764	HPCAL4
1.43382e-05	4.07561	KIAA1107
1.6422e-05	-3.04883	CDKN1A
6.01425e-06	6.72587	ATP2B2
1.65751e-05	4.30047	RASGRP1
1.00121e-05	4.92862	AGAP2
1.98995e-05	5.66915	SNAP25
1.87744e-05	4.97066	MYT1L
1.78892e-05	4.43782	MFSD4A
9.66327e-06	6.08087	SNCB
1.31754e-05	8.83655	GABRA1
1.64407e-05	4.63148	NEFH
1.12844e-05	6.05703	GABRG2
2.2489e-05	-3.18825	GBP1
1.11233e-05	6.09872	RYR2
2.50659e-05	2.74791	NCDN
2.60702e-05	3.67732	PHYHIP
1.64648e-05	5.1711	ACTL6B
1.97354e-05	5.67788	SRRM4
3.08685e-05	3.98336	SCN2A
3.09061e-05	2.4343	PAK1
3.06441e-05	-2.94273	LOXL2
1.54347e-05	7.33381	CRYM
3.28114e-05	4.47744	EEF1A2
3.34502e-05	2.66926	KLC1
3.46811e-05	4.64448	CKMT1A///CKMT1B
2.0126e-05	7.04535	SYNGR3
2.60715e-05	6.48941	GABRA2
3.85922e-05	2.85904	CALB2
4.0665e-05	2.8951	RAP1GAP2
2.4671e-05	4.81699	MIR7-3HG
3.97869e-05	-3.43964	CFI
4.32507e-05	2.95932	PAIP1
3.95419e-05	5.07566	NPTX1
3.26802e-05	6.70151	SYNPR
2.92291e-05	6.96057	SLC12A5
4.74376e-05	2.70768	LOC285147
4.8709e-05	-2.45302	ZAK
4.72194e-05	3.3048	FGF9
4.73864e-05	-3.41033	VIM
4.82371e-05	4.28616	TMEM151B
5.19859e-05	2.66243	LOC285812
5.19602e-05	-2.91941	CD9
5.28755e-05	2.03706	ATP1B1
5.46265e-05	4.20662	NEFL
5.43291e-05	2.05216	NISCH
5.54262e-05	3.33653	IPCEF1
5.66208e-05	3.82464	RBFOX1
3.72396e-05	4.77668	SLC6A15
6.07516e-05	-2.66014	PLIN2
6.23393e-05	2.61535	KIAA0513
6.12702e-05	2.10544	DNAJC6
6.1585e-05	2.3785	MAP1A
6.38483e-05	3.11154	NRIP3
6.3572e-05	3.83362	GABBR2
4.01371e-05	5.57366	SULT4A1
5.39819e-05	3.92053	SRCIN1
7.0139e-05	2.72941	ARRB1
5.01532e-05	4.54145	MAST1
7.79006e-05	-2.95525	COL11A1
5.31719e-05	4.42197	HAR1A
5.66463e-05	5.18527	SCN2B
7.96732e-05	3.03253	LOC101927826///FBXO41
7.40974e-05	-2.11591	PMP2
8.13757e-05	3.43011	PSD3
7.88784e-05	3.86206	CA4
8.21126e-05	2.67314	FRRS1L
8.40514e-05	3.60772	PRKCB
8.39433e-05	-3.49249	CTSC
5.52791e-05	5.57116	ZNF385B
8.57001e-05	-3.63672	TNFSF13B
5.2823e-05	5.0362	CACNA1B
5.63032e-05	5.84204	LOC101930363///LOC101928349///LOC100507387///FAM153C///FAM153A///FAM153B
8.92043e-05	2.93739	SEPT3
6.78672e-05	4.62748	CELF4
5.95507e-05	5.68665	CPLX1
9.10904e-05	3.76786	KCNQ2
7.01057e-05	4.8227	PATJ
6.21135e-05	4.18326	CAMSAP3
6.1728e-05	7.39729	MAP4
9.65255e-05	2.82874	LOC100507547///PRRT1
7.32591e-05	6.41735	SYN2
9.82946e-05	3.31985	SV2B
6.43001e-05	4.59554	BSN
6.51619e-05	4.50972	AAK1
0.000103495	2.11795	GOT1
7.67725e-05	5.11571	MAL2
0.000108296	3.39023	GNAO1
0.000109568	2.73101	EPB41L1
0.000110403	3.64283	ADD2
0.000107771	3.6257	MEG3
8.77471e-05	4.8471	TMEM51-AS1
0.000104973	-2.32249	CLIC4
0.000103887	-2.02153	RPS27L
0.000115025	-3.03363	RNASE4
0.000114897	4.64259	RUNDC3A
8.13082e-05	4.67508	KCNJ6
0.000117145	2.3991	CDYL2
8.38032e-05	4.55358	DYNLRB1
0.000115945	-2.34052	PDGFC
0.000103201	3.46549	PRSS3
0.000125512	3.12343	ST8SIA5
8.75033e-05	5.49673	CPLX2
0.000127571	-2.69182	PHLDA1
0.000128467	2.8213	SYNGR1
0.000129989	-2.60361	CD44
0.000129421	2.24142	GARNL3
9.23145e-05	4.47945	ELAVL2
0.000130374	2.40803	NBEA
0.000130216	-1.99842	RAB13
0.000138025	3.09827	GNAS
0.000104941	-4.56424	MIR34A
0.000147132	-3.281	GBP2
0.00010711	4.47719	KIRREL3
0.000120337	5.98753	OGDHL
0.000152532	3.94601	RGS7
0.000151527	2.01834	PDXP///SH3BP1
0.000156588	2.67615	PKP4
0.000146664	4.63484	RPH3A
0.000158093	-4.0897	ANXA1
0.000165082	2.63521	RUNDC3B
0.000166803	3.363	GNG3
0.00015798	-2.68222	ZFP36L2
0.000172481	2.62636	AHI1
0.000174567	-2.76797	ANO6
0.000181818	-2.36675	AKAP13
0.00018717	3.68194	PPM1H
0.000179743	3.80577	TMEM178A
0.000138869	5.42126	MAP7D2
0.000178622	-5.02608	SERPINA3
0.000164388	5.60456	RBFOX3
0.000166208	-2.06715	SPARC
0.000187785	-2.06125	TWSG1
0.000193442	-2.39905	C1R
0.000196007	-4.05368	EMP1
0.000198789	3.04542	AFF3
0.000193954	2.65204	CAMTA1
0.00020346	-4.04802	AHR
0.000207609	2.56613	DOCK3
0.000207149	-2.74789	TMEM255A
0.000206303	2.38496	RAP1GAP
0.000165117	3.97793	PGP
0.000164684	4.29344	STX1B
0.000216394	4.49722	KCNJ3
0.000182243	-4.19626	IGFBP5
0.000217568	2.76319	APLP1
0.000226797	-3.0549	TNFRSF10B
0.000227975	4.68297	CAMK4
0.000221977	2.17144	SAMD12
0.00022939	-3.4098	C10orf10
0.000178718	4.30699	PAK6
0.000227501	-2.59622	TNFRSF1A
0.000190776	6.50981	PDE1A
0.00023251	3.71959	ST8SIA3
0.000214491	-2.49217	CEBPD
0.000211522	1.69637	PPP3CB
0.000198487	4.82587	AKAIN1
0.000203833	-1.90513	HLA-C
0.000212765	3.71899	UNC5A
0.000243474	-2.56677	PRKD1
0.000224814	-3.94544	ANXA2
0.000240048	-3.26309	C1S
0.000238298	3.07435	ANKRD34A
0.000247874	3.72036	SHANK3
0.000240071	-2.18741	IFI16
0.000256788	-2.61992	NMI
0.000204824	5.14071	PTPRR
0.000208499	4.31605	AMER3
0.000254601	-2.37423	TM4SF1
0.00026266	4.25366	CDH18
0.000217406	4.06771	OBSCN
0.000261216	3.70504	CDC42
0.000219468	4.51959	IQSEC3
0.000263154	-2.1704	BACH1
0.000268063	4.37399	RIMS1
0.000219532	5.72317	KRT222
0.000223466	3.95989	SGPP2
0.000266158	4.28885	TAGLN3
0.000210223	3.94873	PRMT8
0.000250897	-1.76772	P4HB
0.000220147	4.45492	MTUS2
0.000275576	2.60957	DMTN
0.000268598	2.74767	HPCAL1
0.000244611	-3.27674	HLA-DRA
0.000266996	2.73857	MICU3
0.000217067	4.07839	EPHA6
0.000271379	2.49444	MAGEE1
0.00023167	-6.27234	LYZ
0.000283064	3.28846	STXBP5
0.000275919	2.25835	CNTNAP1
0.000262222	-2.96307	TIMP1
0.000226989	-4.5899	SERPINE1
0.000281991	-2.60706	ABI3BP
0.000255809	2.02138	LOC101930324///NSF
0.000263816	3.41178	NDRG4
0.000248994	-2.16287	SRGN
0.000228488	4.53455	CABP1
0.000284288	3.38193	CAMKK2
0.000286053	3.05394	PITPNM3
0.000276061	2.44489	DYNC1I1
0.000274735	-1.97049	HLA-G
0.000244041	4.28364	GNG13
0.000296577	2.25299	REPS2
0.000291474	3.27035	RAB11FIP4
0.000272588	4.49286	ATP2B3
0.000287897	-2.6147	GNG12
0.000299417	2.19692	GFOD1
0.00025742	1.78978	CALM3///CALM2///CALM1
0.000270282	4.47154	LGI3
0.000284112	-1.90761	ANXA5
0.000316287	2.82328	SEZ6L2
0.000294118	-1.87927	CTNNA1
0.000271298	-4.14446	DOCK1
0.000324654	2.79455	TPM3
0.000258452	3.75549	RNF43
0.000307723	2.36039	CNKSR2
0.000308427	3.02118	CRTC1
0.000319446	2.17651	MAPK8IP3
0.000306096	-2.32731	SLC40A1
0.000338676	-3.3815	PPP1R18
0.000293573	5.031	OLFM3
0.000318449	2.6262	LZTS3
0.00029092	3.85703	BRSK2
0.000326485	2.80812	TPPP
0.000297565	4.07511	CERS5
0.000301498	4.21463	DNHD1
0.000351037	-2.66121	MVP
0.000302049	4.07391	LOC100506071
0.000352456	-2.56978	ELF1
0.000292111	-3.88163	PNLIPRP2
0.000316072	-1.86288	CTSB
0.000355789	-2.69533	PRSS23
0.000367317	2.90036	RAB3A
0.000366735	3.64657	CDK5R1
0.000345055	-1.66411	PTP4A1
0.000329132	4.87381	ADAM11
0.000362978	2.981	AMPH
0.000362025	-1.92587	LOC101926921///DAB2
0.000382648	3.00436	PNMA3
0.000325945	-4.06431	RDH10
0.000314488	-3.63225	ENTPD1
0.000335487	5.09328	WSCD2
0.000370045	-2.43358	ITGB1
0.000374028	2.01637	ASPHD1
0.00033353	-3.69114	TWF1
0.000378494	2.77116	SV2A
0.000394106	2.1496	DGKZ
0.000404131	3.16808	KNDC1
0.000364496	-1.86381	CYBRD1
0.00038347	1.97794	MAPK9
0.000393891	1.98704	TMEM246
0.000425068	-3.54559	HLA-DPA1
0.000390646	-2.92826	GADD45A
0.000401738	-2.72084	CAV1
0.000409714	3.09531	ACSL6
0.00039146	3.91661	ATP6V1G2
0.000392139	4.31768	GRIN2A
0.000420369	1.8855	DHCR24
0.000424445	2.17465	CACNB2
0.000428319	6.38115	STMN2
0.000373647	5.78843	GAD2
0.00037335	4.52713	TTC9B
0.000382952	3.81522	NEURL1
0.000416688	3.03905	LONRF2
0.000426126	-2.14649	RBMS1
0.00045136	2.88693	SLC4A8
0.000448314	-3.43945	DPYD
0.000370039	-3.67642	IL1RAP
0.000446091	-2.25831	DTX3L
0.000409814	-3.99078	NAPSB
0.000460197	2.21047	CACNB3
0.000435381	5.39546	ATP8A2
0.000417186	4.7789	CNTNAP4
0.00045203	3.31881	TBC1D30
0.000400816	3.9542	LOC401220
0.000401642	3.73609	C1orf168
0.000403769	-3.28524	C3
0.000436437	-2.59508	KANK2
0.000443142	-4.6181	CSPG4
0.000436271	1.67768	GOT2
0.00048265	-2.5397	CP
0.000480625	3.25086	CLCN4
0.000445911	4.26604	RXFP1
0.000475598	-2.83268	ITPRIPL2
0.000490813	3.3142	SLC7A14
0.000461154	2.90684	RIMS3
0.000478875	-2.41097	ETS1
0.000474053	3.40972	KCNC1
0.000467222	-2.77293	FPR1
0.000478558	3.12593	SVOP
0.00043442	4.36133	CCKBR
0.00043604	4.8766	HOOK1
0.00042796	-2.75307	LOC101060835///LOC100996809///HLA-DRB5///HLA-DRB4///HLA-DRB1///HLA-DQB1
0.000460665	-2.63962	LAPTM5
0.000453333	3.80941	OTUD7A
0.000527945	2.6649	MAP3K9
0.000452879	-1.89348	TMED5
0.00048828	4.95781	SEZ6
0.000511158	2.49327	GNB5
0.000500811	2.192	TTLL7
0.000494397	-1.70269	BCAT1
0.000443795	-2.23465	RAB31
0.000477469	5.80272	RAB3C
0.000497466	-1.89532	PXDC1
0.00050344	-1.78464	HDAC1
0.00051355	4.59237	ARPP21
0.000544603	3.26748	ZCCHC12
0.00054466	3.36693	2024-03-06
0.000560044	3.04206	SEPT6
0.000560564	-2.63103	CD4
0.000465197	2.80222	KIF5C
0.000483421	3.45722	BUB3
0.000514603	-4.40972	PSMB8
0.000577895	3.21316	NCS1
0.000513913	3.603	FABP6
0.000553821	2.75893	PPP1R16B
0.000530785	-1.94698	NES
0.000522864	-3.88552	UNC93B1
0.000531357	-2.67361	ABCA1
0.000593917	3.19004	ARHGAP44
0.000596253	2.48862	STXBP5L
0.000528461	-1.62097	HEXB
0.000595948	2.91549	SHANK2
0.000620339	2.44816	ITSN1
0.000588745	2.13262	TEF
0.000552541	-1.78451	MAGT1
0.000589001	-2.72958	TSPAN6
0.000577184	4.52576	NOS1AP
0.000601124	3.50868	CADPS2
0.000567171	-3.76156	AKNA
0.000585299	3.74503	RAPGEFL1
0.000584234	3.51825	DMPK
0.000613779	1.85759	PRDM2
0.000637375	2.1131	APBB1
0.000578766	-1.77294	SGCB
0.000623539	4.04383	PTPN20
0.000620327	4.3743	CDK5R2
0.000623054	-2.11763	PRKD3
0.000591434	-1.53545	NOTCH2NL
0.000614714	-3.7616	COL5A1
0.000611926	3.45845	CAMK2G
0.000660811	4.7628	GRM3
0.000683099	2.38786	CACNB4
0.000584627	-1.70262	TMED10
0.000570216	-1.75548	ATP6V0E1
0.000683726	-3.64473	SFRP4
0.000630164	-2.46639	RAP2B
0.000615015	1.69547	TUBA4A
0.00062701	-2.07617	CCDC50
0.000690791	2.51516	SGSM1
0.00068044	4.36808	LOC101927137///ATP1A3
0.000663627	-3.59569	MS4A7
0.000669034	5.22507	ANK1
0.000715789	2.52871	LPCAT4
0.000650408	4.08623	DAB1-AS1
0.0006109	3.51799	CLN6
0.000701502	-2.66272	CD93
0.000666512	1.8448	ATPAF1
0.000590341	-3.71259	S100B
0.000724116	2.73811	DIRAS1
0.000677153	3.7403	FAHD2CP
0.000672579	4.76943	TMEM130
0.000657504	-2.58863	YBX3
0.000669012	-3.67629	ARHGAP18
0.000740493	2.62167	CCDC177
0.000627172	3.45646	PTPRD
0.000739353	2.18118	ARHGDIG
0.000676217	3.81362	CLEC2L
0.000678243	-2.99892	LOC100506558///MATN2
0.000705077	-2.8184	DUSP6
0.000694868	3.63015	GRIN1
0.000709508	-1.84614	CTBS
0.000708151	2.21373	PIP5K1B
0.000749527	-4.84979	HGF
0.000667117	1.56961	PI4KAP1///PI4KAP2///PI4KA
0.00071355	2.30457	B4GALT6
0.000701277	3.33782	FAM57B
0.000759744	4.66196	LOC100996843///KCNJ18///KCNJ12
0.000699036	-2.86166	C1QA
0.00072898	2.88177	CADPS
0.000754494	4.12376	CLCNKB
0.000672507	1.80196	PREPL
0.000738744	4.36785	SYT4
0.000751173	3.84398	EGR4
0.000694626	1.88964	RABGAP1L
0.000758794	4.41743	CFC1B///CFC1
0.000765643	2.01111	SCAMP5
0.000641083	2.11044	OIP5-AS1
0.000726894	1.6855	UBE2K
0.000833096	-2.30391	ERAP1
0.000805947	2.39124	LRP8
0.000768997	-2.79468	HLA-DMA
0.000793292	4.08686	SYT7
0.000785203	-4.19077	NFATC2
0.000746435	-1.80722	LRP10
0.0007603	-1.86476	STK17A
0.000773797	3.54116	PIEZO2
0.000740801	3.29165	GABBR1
0.000783789	-3.83859	HPSE
0.000752926	3.18913	DNM3
0.000845434	2.39814	PPP1R1A
0.000764258	1.84128	NECAP1
0.000760772	-2.19961	MBD2
0.000791644	-2.35752	CLEC2B
0.000855738	3.28707	CELF5
0.000755397	-2.46418	CD14
0.000811237	-3.65596	TWIST2
0.000807342	3.78641	GLS2
0.000807107	4.06226	OPRK1
0.000811464	-3.45838	ADGRE2
0.000856766	3.76856	MCF2L
0.000815049	3.6726	OTOP2
0.000812039	4.55607	CHGB
0.00083139	1.74821	CCDC85B
0.00070279	-1.47656	ITGAV
0.000817522	1.83764	SCAMP1
0.000856505	4.02309	SCN8A
0.000822916	2.17728	CEP126
0.000858853	-4.51953	SYTL4
0.000906265	3.16152	AP3B2
0.000787197	-1.76503	SNAP23
0.00084124	4.29895	CALY
0.000862327	1.94847	RAB15
0.00085508	3.99942	CACNG2
0.000773225	-2.72094	VSIG4
0.000878863	-1.88543	PGM2
0.000918607	2.3031	LOC105371352
0.000925638	2.77435	PTK2B
0.000738634	-2.51083	HLA-DRB1
0.000832315	-1.85474	RSU1
0.000866608	2.45456	CYFIP2
0.00088941	3.13543	TSPYL1
0.000900426	2.20851	APBA1
0.000942313	3.15017	SPTBN2
0.000942134	-2.55051	PYGL
0.000895532	1.85906	FBXW7
0.00092165	3.50799	LOC153811///RNF130
0.00081187	1.67831	NCOA7
0.000874262	-2.55491	SIPA1L2
0.000897392	-2.79176	CLIC1
0.000864969	-1.59287	TMEM167A
0.000912402	-3.20527	MS4A4A
0.000947646	-1.87944	SYNCRIP
0.000999968	5.60963	SLC1A6
0.000990695	5.89516	GABRD
0.000964743	-3.60755	GFRA1
0.000851999	-2.16393	SRPX
0.000921169	-2.10569	ALCAM
0.000993362	2.09013	PLXNA2
0.000991286	4.29204	UNC13A
0.000928905	-3.8401	MEOX2
0.00105709	2.62909	ZNF385D
0.00107151	3.50463	JPH1
0.0010742	2.81672	SEPT5-GP1BB///SEPT5///GP1BB
0.00101796	3.57307	LRRC7
0.000975343	1.84546	SLC25A27
0.000963019	-3.53852	COL4A1
0.000936544	-1.86236	CNN3
0.000944397	1.98737	FAM126B
0.0010544	4.99211	GRM1
0.000977095	-1.88649	FIGN
0.0010545	4.6668	KIAA1644
0.00100471	1.72583	EXOSC6
0.00110202	3.04342	SPTBN4
0.00103425	3.84608	DGCR10
0.00104849	-4.05126	CD84
0.00106847	4.03193	CES4A
0.00100801	1.7443	MBLAC2
0.00108302	4.45337	POLB
0.000997022	1.78489	VAMP2
0.00110684	3.08311	SLC6A13
0.00101533	-4.68595	ID3
0.00111716	-2.71364	C5AR1
0.000834595	-1.46128	CD63
0.00105822	-3.60851	DHRSX
0.000947352	-2.22403	TMEM123
0.00106298	2.167	NEDD4L
0.00115226	3.31871	SLC6A17
0.00109597	-5.18502	HLA-DQB1
0.0011565	4.92141	SPHKAP
0.00109075	-1.95955	MKLN1
0.00102153	2.14769	ROGDI
0.00107565	2.45684	MYRIP
0.00112037	2.46494	DCUN1D5
0.00110448	3.85601	SEPT4
0.00109612	-3.21762	LTBR
0.00109696	3.2561	LOC101930602///SLC14A2
0.000820556	-1.52921	SNORA64///RPS2
0.000953409	1.82923	KIF1B
0.00113908	2.41007	MPP2
0.00106704	-2.22005	ANXA4
0.00102107	1.55695	WDR7
0.00114779	2.33465	PRKCE
0.000956157	-3.23929	S100A10
0.000915171	2.08056	MLLT11
0.000910367	-2.16066	A2M
0.0010123	-1.93496	LGALS3BP
0.000950049	-2.01032	HLA-B
0.000959416	1.89515	GABARAPL3///GABARAPL1
0.00113648	2.72517	RNF130
0.00101802	-1.6625	LAMP1
0.0011491	-3.39271	LINC01268
0.00114481	1.90405	LOC101927562///DUSP8
0.00113759	-2.38634	GYPC
0.00104453	2.49941	RCAN2
0.00100059	-1.36775	DEGS1
0.00105529	-1.86284	RIN2
0.00108052	-2.61898	TYROBP
0.00120882	4.06374	FGFR2
0.00101725	-2.21859	CEBPB
0.00116539	2.51545	RUNX1T1
0.00103306	-1.61629	SEC11A
0.00120389	2.9238	PRRT2
0.00120978	3.64293	SYT3
0.00123092	-2.59404	GLIPR1
0.00107309	-2.43157	ARHGDIB
0.00121594	3.50686	CASP12
0.00103731	3.31457	NREP
0.00116884	-2.36213	CD58
0.00127492	5.21897	PRKCZ
0.00124846	-2.7181	GEM
0.00123071	3.86956	TUBB4A
0.00121428	3.59788	RAB9BP1
0.00114198	1.56922	TTC7B
0.00131051	2.13223	ZC3H8
0.0010975	-1.5426	TMX1
0.00131478	-3.92363	SCIN
0.00114722	2.07473	GUCY1B3
0.00120768	1.88609	ABHD14A///ACY1
0.00121438	-1.77915	NUDT5
0.00112475	1.39703	INPP5F
0.00134976	2.93525	EIF4E
0.00117789	1.45705	RUSC1
0.00130357	3.18812	LATS1
0.00109373	1.3812	MOAP1
0.00113496	1.64955	MYO5A
0.00136675	6.3045	SH3GL2
0.00109161	2.73609	PWAR6
0.00135595	-2.45707	AAED1
0.00138209	4.53808	C11orf87
0.00128818	1.98704	RNF41
0.00113794	-2.32921	TIMP2
0.00133426	-3.16223	NPAS3
0.00132245	2.34004	ERC2
0.00135991	3.28101	KIF17
0.00121646	-1.61358	CPNE3
0.00121051	-2.21166	GNB4
0.00113035	-1.33079	HSBP1
0.00112864	-2.95372	LOC101060835///LOC100996809///HLA-DRB4///HLA-DRB3///HLA-DRB1///HLA-DQB1
0.00128697	-2.12705	SEMA5A
0.00108621	-2.52304	IGFBP7
0.00141851	3.72076	CYP11A1
0.00141706	4.46243	MMP24
0.00116693	3.48307	RTN1
0.00131053	-2.08592	CNIH4
0.00102621	1.56417	TUBB2A
0.000932241	-1.08888	B2M
0.00141408	3.35033	DOC2A
0.00117973	3.52186	FBXL16
0.00128694	-3.09706	MS4A6A
0.00113651	-1.29748	RLIM///PABPC1
0.0014358	3.34091	CELA3B
0.00132251	-3.41049	COL4A2
0.00150288	-2.42807	SIL1
0.00138139	3.72101	SERP2
0.00147082	4.01339	C3orf80
0.0015257	2.62652	PPFIA3
0.00152074	2.3371	GPLD1
0.00132877	1.87754	PCNX2
0.00148992	-3.67558	SLC24A1
0.00135386	-2.18457	FOXO1
0.00126144	-2.95809	SAMHD1
0.00120185	-2.72662	LOC100996809///HLA-DRB4///HLA-DRB1
0.00147636	2.29389	TBC1D24
0.00136161	2.12283	STRBP
0.00126583	-1.96817	HMGB2
0.00131799	-1.5271	STAT3
0.00152888	3.91718	FAM163B
0.0015509	4.76092	LOC105378589
0.00151554	3.21065	RUNX2
0.00151338	-2.20036	NAMPT
0.00132547	1.62235	ATP6V0A1
0.00139874	2.8173	GRIA1
0.00142868	1.84681	COX7B
0.00130812	1.6821	NUAK1
0.00153597	-3.24933	SMAD6
0.00142344	2.17775	PDZD4
0.00159831	2.64704	BEGAIN
0.00134463	1.58974	HECTD4
0.00156308	2.69518	FAIM2
0.0014892	-2.03922	PLSCR1
0.00124956	1.76355	EFR3A
0.00165176	2.41789	TMEM110-MUSTN1///MUSTN1///TMEM110
0.00131255	-1.31967	BZW1
0.00147808	-2.1285	NEDD1
0.00159078	-3.22113	PARD3
0.00148437	-2.95637	AIF1
0.00138957	-2.6034	MTHFD2
0.00164487	-4.13354	CD300A
0.00159448	3.11301	SCD5
0.00111372	1.52514	PTPRO
0.00147119	-1.77938	HSPA4
0.00157035	4.48886	INA
0.00151324	-2.90753	MYOF
0.00133309	1.5991	TRIM37
0.00141707	2.743	GPRASP1
0.00133045	-1.4518	SGCE
0.00169569	3.66816	DGKE
0.00170066	5.289	LRCH1
0.0016402	4.28708	RAG2
0.0015805	2.75511	JPH4///AP1G2
0.00146011	-1.61936	CAST
0.00172183	3.75814	KCNJ9
0.00147601	2.30877	KCNA2
0.00169207	3.67479	DKFZP761C1711
0.0014131	-1.46986	KCTD20
0.0017298	3.73776	SOWAHA
0.00168122	3.20463	ACAP1
0.00158808	-3.52269	IFI30///PIK3R2
0.00173012	4.89072	CYP4X1
0.00172146	3.99706	C1QTNF4
0.00170173	-2.93321	TRIM6
0.00152627	-2.22599	WIPF1
0.00172404	2.17015	BRSK1
0.00175123	2.47392	PLCXD2
0.00158279	1.76307	STOX2
0.00176673	3.21961	AIFM3
0.00177338	2.76386	CDKL2
0.00155651	-1.82476	PTPN13
0.0017246	2.28122	MAPK8IP2
0.00178597	2.90448	NEUROD2
0.00180559	3.60946	NNAT
0.00176756	2.02736	DLG4
0.00174869	3.54416	VIPR1
0.00180586	3.63307	RAB26
0.00176364	3.47136	FRMPD4
0.0017752	4.44853	SLC8A2
0.0017703	3.34909	RPS28
0.00167529	3.12089	UNC80
0.00153432	-1.95413	SLA
0.00168159	2.11572	CAND1
0.00168406	-1.69571	ACTL6A
0.00185447	3.25631	STX1A
0.00183345	-2.73332	MAN2B1
0.00187042	3.28501	FSD1
0.00182304	3.78556	SYNE4
0.00179873	-3.66004	PLEKHS1
0.00160735	-1.88393	GNS
0.00160385	-1.96994	RECQL
0.00160561	1.92744	SS18L1
0.00189561	-4.0192	IGK///IGKC
0.00154687	2.15063	NAP1L2
0.00164062	1.93626	KIAA1549L
0.00183355	2.94531	AURKAIP1
0.0016379	-1.65314	SLC35F5
0.00169057	1.57568	ELK1
0.00187118	-2.80878	TLR1
0.00179372	2.06387	PPP1R13B
0.00176712	1.95266	PKI55
0.00171416	-2.55335	SIGLEC10
0.00148389	-1.40963	PPIB
0.00190615	4.66491	XK
0.00182957	2.04826	VPS53
0.0018974	3.81297	UBE3D
0.00182459	-3.59453	SCEL
0.00189522	3.25329	GOLGA7B
0.00190393	-3.22944	PTCHD4
0.00192536	-3.47124	BOLA2
0.00190882	2.96058	DGKG
0.00191884	-3.26753	F2RL1
0.00151785	-2.56953	ALOX5AP
0.00193646	-3.31354	CD52
0.00175043	3.68895	FSTL5
0.00195127	3.9676	TCERG1L
0.00171526	-1.70958	PLEKHF2
0.00160123	-1.54258	SORBS1
0.0019584	-3.47777	MPHOSPH9
0.00175605	1.70457	EFR3B
0.00195003	3.22114	INTS4P1
0.00194262	2.64142	LOC283713///OTUD7A
0.00173436	2.03544	SCN1B
0.00184203	2.41297	ZNF540
0.00189021	3.60088	LOC100507073
0.00176124	-1.76373	GADD45B
0.00199686	3.63814	LOC101930421
0.00175907	-1.7578	OSMR
0.00199372	-3.15838	NCF1C///NCF1B///NCF1
0.00193258	-3.98236	SLFN13
0.00203127	4.64406	LOC101930404///SNORD116-28///SNORD115-26///SNORD115-13///SNORD115-7///SNORD116-22///SNORD116-4///PWARSN///SNORD107///SNRPN///IPW
0.00197817	2.20918	C10orf35
0.00182141	-2.49416	SQRDL
0.00199899	3.26201	CNGB1
0.00205428	-3.85079	ZNF217
0.00206385	4.17404	PNMAL2
0.00200625	3.45613	B4GALT1
0.00211546	2.73921	CLEC4GP1
0.00174982	-2.88716	FCGR3B///FCGR3A
0.00200965	2.25559	MAGI1
0.0018162	-3.25074	TMEM176B
0.00172277	1.8682	PKIA
0.00180416	-1.54477	EVI5
0.00212085	2.53081	PCP4L1
0.00175979	-2.74571	CXCR4
0.00169256	1.90071	GDAP1
0.00168805	1.99832	EPM2AIP1
0.0017089	1.74364	YWHAH
0.00216553	5.37672	MOBP
0.00194729	1.84839	OLA1
0.00212114	-3.5529	CASP1
0.0019057	-2.72693	TREM2
0.00198734	4.64508	SNAP91
0.00218641	2.64882	SMIM17
0.00198756	2.23845	POU6F1
0.00188963	-1.61838	GM2A
0.00178487	-1.72015	LBR
0.00183802	-1.88534	SPRED1
0.00180527	1.65467	CORO2B
0.00186773	-1.68711	STON1
0.00174652	-2.76157	C1QB
0.00218166	2.45889	PLCH1
0.00192361	1.60293	INPP4A
0.00222969	-2.3785	CASP6
0.00183405	1.72254	PI4KA
0.00179227	-2.77907	PALLD
0.00207021	-2.98051	SAMSN1
0.0021844	-3.30287	BIN2
0.0022134	3.43769	CPLX3
0.00223659	-5.25069	VMP1
0.00169405	-2.39471	RNASET2
0.00199586	-1.91793	GALNT10
0.00208698	2.02009	CABLES2
0.00177164	-1.92412	LAMP2
0.00226116	4.50355	RUFY2
0.00214883	-2.48936	TRIM14
0.00224763	3.79256	KIAA0319
0.00224893	-3.62405	FBN1
0.00224354	3.11515	BCL2L14
0.00189899	1.59437	C16orf72
0.00207675	-2.19777	PQLC3
0.00219139	-3.91471	CYR61
0.00194552	1.64869	CLTB
0.00218881	2.93537	OPALIN
0.00189516	-3.22701	MAFB
0.00180055	-1.45024	ATRAID
0.00229715	2.9038	GRM4
0.00191913	2.1453	SMIM10L2B///SMIM10L2A
0.00205341	-1.87239	F11R
0.00181313	1.95647	ATP6V0E2
0.002301	-2.45379	TGIF1
0.00234881	2.63335	MIR124-2HG
0.00234084	3.59689	SLC5A11
0.00175963	2.2194	NAP1L3
0.00188143	1.91404	PIK3R3
0.00225766	2.65198	PPFIA2
0.00185897	-1.63688	PRDX4
0.00182742	-1.36839	FNDC3A
0.00209817	1.9259	KIAA0368
0.00236328	5.13207	PPFIA4
0.00234592	3.31376	SLC26A8
0.00208393	-2.88442	VAMP8
0.0020257	1.54993	LSM11
0.00241379	5.30654	ERMN
0.00237152	3.32559	HHLA2
0.0018752	-1.93436	MCL1
0.00240175	3.28815	SLC9A5
0.00234962	3.13075	CYP2E1
0.00207905	-2.04892	NUDT4P1///NUDT4P2///NUDT4
0.00217902	-2.4542	LY96
0.00245652	4.29807	C9orf24
0.00242704	3.01788	PERP
0.0024261	2.48471	TRHDE
0.00201487	-1.71842	IL13RA1
0.00244525	3.0954	LOC101929777///WNT3
0.00200273	-1.64666	SH3GLB1
0.00225641	-2.03125	AEBP1
0.00223291	-2.09002	IL10RA
0.0023182	-2.51914	TMED9
0.00215175	1.82773	FBXO9
0.00206723	-2.25995	SERPING1
0.002509	4.52382	KCNA1
0.00197725	-1.54409	SAP30
0.00236756	-1.97742	THEMIS2
0.00187611	1.7528	PPP3CA
0.00249807	-3.00914	PLEKHA8P1
0.00250818	3.31107	VRK3
0.00236497	1.88854	TUSC3
0.00247087	3.13525	FAM19A4
0.0023639	2.5491	DISP2
0.00252956	2.92366	SH3GLB2
0.00250061	3.33317	HIVEP2
0.00177395	-1.19407	LAPTM4A
0.00255843	3.31012	SLC38A10
0.00194791	2.2267	KIF5A
0.00244172	2.45127	KSR2
0.00261041	3.3793	CHD5
0.00234011	3.08347	CDS1
0.00233798	-1.89144	CNKSR3
0.00197049	-1.58017	CCNG1
0.00210526	-3.25787	ANXA2P2
0.00259956	-2.5846	SPIDR
0.00225987	1.85805	ARGLU1
0.00261206	3.436	SYNE1
0.00209281	-2.13541	LIMS4///LIMS3///LIMS1
0.00199057	-2.07127	NPC2
0.00239722	-2.33392	MCUB
0.00252935	3.2985	REST
0.00265449	-3.26517	MBNL3
0.00191705	2.09062	LOC101930075///NPIPA8///NPIPA7///NPIPA5///NPIPA2///NPIPA3///PKD1P1///NPIPA1
0.00199837	-3.67174	RGS1
0.00195685	-1.34959	SLC39A6
0.0022603	1.47566	CNST
0.00249077	-4.67493	PROS1
0.00265016	-3.79764	FCGBP
0.00223989	1.75511	SMARCD3
0.00208543	2.01453	STMN3
0.00269745	-3.16871	ITGA4
0.00222168	-2.34304	LPAR6
0.00237841	-2.48173	CD86
0.00272245	3.21882	SLC27A2
0.00231117	-3.08862	LOC101060835///HLA-DQB1
0.00233332	-1.71802	CMTM3
0.00194976	-1.749	SERPINE2
0.00235975	-2.03639	TNFRSF21
0.00226223	1.77916	SKP1
0.0027757	-3.50931	SYK
0.00254892	2.21499	SEPT11
0.00213303	-1.37575	TMEM50A
0.00223241	-1.67053	CTTNBP2NL
0.0027953	2.73219	SEMA3F
0.00254933	-1.72828	NCAM2
0.00284145	3.37889	BICDL1
0.00227388	-1.70923	IFIT2
0.0026227	-2.56795	NPL
0.00209455	1.32177	TSPYL4
0.00263158	-1.80844	B4GALT4
0.0025726	1.6979	UNC79
0.00287236	3.032	TMEM134
0.00262072	-2.21487	CCDC71L
0.00293402	5.29241	SHISA8
0.0022257	-1.32488	DDOST
0.00296221	2.70523	GALNT9
0.0029652	3.64112	TNFRSF25
0.00240933	-1.72594	CD164
0.00290896	2.81744	ATG9B
0.00229696	-1.63779	COTL1
0.00295044	-2.96973	EMILIN1
0.00296616	3.21119	LETM2
0.0023772	-1.90198	SLC2A5
0.00273577	1.83324	OVCA2///DPH1
0.00236055	-1.47627	PAPOLA
0.00302944	-3.78143	LOC100509457///HLA-DQA1
0.00301428	2.61714	RTN4R
0.002177	-1.37153	CREG1
0.00306355	4.13158	DLG2
0.00301851	5.22061	MIR124-1///LINC00599
0.00254466	-2.01147	ZC3HAV1
0.00300501	3.34477	SERINC2
0.00305079	3.7492	SPIRE2
0.00307901	3.98307	GPR22
0.00232934	-2.12987	C11orf96
0.00239437	2.26592	LRRTM2
0.00230397	-1.32041	TXNDC12
0.0022601	-1.4982	NEK7
0.00305933	-3.52137	GDF15
0.00252964	-1.69625	SPPL2A
0.00279247	1.70232	PPP2R2D
0.00304867	3.52627	DEUP1
0.00253329	1.49104	ARHGAP26
0.00311232	-2.80805	CLEC4A
0.00312618	3.0226	DLGAP1-AS3
0.00307702	-2.73587	ZC3HAV1L
0.00318243	2.56257	PHF24
0.00273744	-2.10279	CXCL16
0.003147	3.138	TMCC2
0.00255239	3.24788	LOC100507353///CACNA1A
0.00296719	-2.61874	SP100
0.0024499	-1.25588	SNRPD3
0.00251819	2.05575	ATP8A1
0.00226521	2.05656	LOC102724993///LOC101930075///NPIPA8///NPIPA7///NPIPA5///NPIPA2///NPIPA3///PKD1P1///NPIPA1
0.00285405	-2.45998	P2RX5-TAX1BP3///TAX1BP3///P2RX5
0.00274249	2.90535	SRGAP3
0.00322008	-2.44207	BTN3A2
0.00279859	1.78573	MIR600///MIR600HG
0.0032043	3.05437	WNT10B
0.00319569	2.83708	CACNA1C
0.00293542	1.77191	AKAP6
0.00321511	3.04113	COLGALT2
0.00316681	3.19142	CD22
0.00308582	2.02907	TMEM25
0.00238125	-1.31243	SUB1
0.00326685	4.27445	ANKRD34C
0.00254851	1.68074	PIK3C3
0.00321827	-2.83326	FBLIM1
0.00321655	2.98738	FARS2
0.00278064	-1.7226	SP110
0.00259031	1.59984	ADAP1
0.00220636	-1.19978	SDCBP
0.00268122	2.06234	ADGRL1
0.00326736	3.01438	WNK2
0.00278088	-1.87991	RASSF3
0.00328605	3.37493	FAM24B
0.00254376	-1.50091	WDR1
0.00328839	-3.13669	ERMAP
0.00319317	2.85848	HSD17B6
0.00238539	-1.59397	RPN2
0.00257304	2.16774	ARMCX5-GPRASP2///GPRASP2
0.00333923	-2.28936	TRIM5
0.00284955	-2.07794	CD151
0.00276378	1.49664	PPP2CA
0.00336758	3.67706	CACNA1E
0.00333986	2.78641	FAM199X
0.00295504	-2.75449	ZNF503
0.00334492	2.95895	TSPAN1
0.00249337	1.8079	OXCT1
0.00271717	-2.01329	YAP1
0.00280272	2.59688	DNAJA4
0.00285411	-2.51891	CTSS
0.00257061	-2.05723	HSPB1
0.00338942	2.98868	PLEKHM1
0.00310212	1.69016	PPP1R3F
0.00343586	3.55116	CPNE6
0.00271676	2.39031	ZNF365
0.00279032	1.55294	PIP5K1C
0.00272947	1.86312	DENND5B
0.00269367	-1.44693	SMARCE1
0.00337773	3.05969	ASB10
0.00267989	1.94678	LOC101930583///GOLGA8B///GOLGA8A
0.00252628	-1.37434	SCP2
0.00348523	-3.73909	TNIP2
0.0029089	3.32497	NMNAT2
0.00286706	-1.90019	DOCK11
0.00343054	2.77172	GFOD2
0.00347724	-3.15311	SAMD9
0.00303404	-1.86618	H2BFS
0.00350303	3.95204	ABCC8
0.0031273	-2.07287	STK3
0.00348901	2.9931	IGHD
0.00339647	-2.98721	FAM170B-AS1
0.00352454	2.54968	MPP7
0.0026838	-1.49079	MIR7703///PSME2
0.00320929	4.11745	LGI1
0.00242173	1.47941	ANK2
0.00243619	-1.4407	LOC101928634///SENP3-EIF4A1///SNORD10///SNORA48///SNORA67///EIF4A1
0.00331392	-2.31319	OLFML2B
0.00321858	1.94935	LOC340085
0.0027998	-1.54547	AK3
0.00297572	-1.81585	CALU
0.00307218	2.2142	KCNMA1
0.00364103	3.24983	JAKMIP3
0.00361808	3.01781	LINC01206
0.00266647	-1.24577	PDIA3
0.00364022	-3.24984	XRCC4
0.00319392	2.29746	DPY19L2P2
0.00336655	2.64023	ADCY1
0.00338097	-2.06797	NRP2
0.0027857	-1.51652	TRAM1
0.00365886	-2.80544	POFUT1
0.00324743	2.83741	CHN2
0.00321969	2.26875	RALGPS1
0.00366408	2.71915	CYSLTR2
0.00282733	-1.76107	HLA-J
0.00362537	3.16777	PRKAR1B
0.00365711	2.75619	LOC100128198
0.00325775	2.08113	SNURF///SNRPN
0.00347824	1.96888	PLEKHA6
0.00323193	1.58514	TTBK2
0.00372824	-3.11602	CD33
0.00369315	-2.22403	STK40
0.00344017	2.23449	ZIM2///PEG3
0.0031156	-1.53968	RRBP1
0.0037097	2.90043	PLAC1
0.00369502	-2.94488	YIPF2
0.00319984	-1.52849	DPY19L4
0.0030782	-1.56816	FBXO8
0.00376226	-2.92954	DUSP4
0.00276791	2.94212	PEG3
0.0030628	1.61565	FAM234B
0.00277984	-1.44929	ADAM9
0.00377691	-3.07213	SYTL3
0.00379062	2.70964	NKX6-3
0.00310465	1.77892	CEND1
0.00280237	-3.01241	CD163
0.00320049	-1.99044	TMEM64
0.00378944	-2.82995	DOCK6
0.00336001	1.8494	SVIP
0.00312664	-2.27609	PTPRC
0.00378923	-2.74015	MGAT2
0.0026144	-1.74367	SAT1
0.00324539	1.80879	WIPF3
0.00386277	3.43857	FUT1
0.0038379	-2.77379	FGF23
0.00276015	-1.47599	ERBIN
0.00387766	3.31742	CACNG8
0.00383597	3.0756	EPB41L5
0.00383255	-2.82682	LAG3
0.00340837	1.52093	RELL2
0.00305555	-1.71157	DCAF13
0.0035798	1.92734	TBL1XR1
0.00391393	3.37094	TMEM87A
0.00278024	-1.72277	DYNLT1
0.00342048	2.45769	SHISA6
0.00343968	-2.43558	SLC16A4
0.00275297	2.09415	NPIPA1
0.0033225	-2.24781	FAM129B
0.00315316	1.62603	ASRGL1
0.00397153	3.24888	PANX2
0.00329125	2.90223	AMER2
0.00398168	-3.29899	PTPN22
0.00228363	-0.922692	RPS19
0.00400318	4.10315	EPHA4
0.0032881	2.0086	ASPHD2
0.00318662	-1.45904	TMEM248
0.00400578	3.63738	CELSR3
0.0027331	1.64003	IDS
0.00316621	-2.28846	S1PR3
0.00370908	-3.24197	MSR1
0.00245405	-1.46244	MT2A
0.00324662	1.81293	IQSEC1
0.00358956	-1.83307	DISP1
0.00406776	-2.83546	RAC2
0.00409463	4.7683	SLITRK4
0.00412335	3.74684	ZNF81
0.00378371	2.80346	SEMA4D
0.00307458	-1.5618	MIR612///NEAT1
0.00342919	-2.24871	ITGB4
0.00317814	1.62628	LARP6
0.00328581	-1.75983	TMX2-CTNND1///CTNND1
0.00412989	2.89406	ADPRHL1
0.00398245	3.24472	LINC00632
0.00329367	-1.46501	WAS
0.00314615	-1.37341	CDK4
0.00415414	-2.9721	CENPN
0.00356984	3.11745	GABRB3
0.00242422	-1.21377	FTL
0.0041853	4.351	ZIC3
0.00355852	2.23337	CCDC136
0.0031267	1.82871	GRAMD1B
0.00421689	4.07523	NHSL2
0.00293358	-1.54884	SSR1
0.00424265	2.99407	FOXRED2
0.00366279	4.10315	CALN1
0.00319371	-1.76702	HSP90B1
0.00378749	1.75604	CLSTN3
0.0035213	1.73144	RNFT2
0.00427851	3.83626	NUP93
0.00419796	3.28277	NUP54
0.00427422	-2.93074	XRN1
0.0042973	-3.06755	NLRP3
0.00349088	-1.51328	FAM20C
0.00314585	-1.93793	P2RX5-TAX1BP3///TAX1BP3
0.00431997	-2.87826	CNTNAP5
0.00315188	1.26417	PPP1R9A
0.00326615	-1.34994	SEC61A1
0.00328472	-2.17588	SNX7
0.00382707	2.03344	CACNA2D2
0.0030997	1.96294	SYS1-DBNDD2///SYS1///DBNDD2
0.00435633	3.03384	HECW2
0.00339676	-1.49773	SMARCA5
0.00440897	2.81109	SSTR2
0.00310439	-1.16773	PHC2
0.0044159	4.38628	SYT2
0.00366386	1.77222	YPEL4
0.00402109	-2.15459	LIMD1
0.00330973	-1.36624	CETN3
0.00446861	3.56758	ERICH3
0.00396205	2.02521	FAM131B
0.00366972	2.76439	RAPGEF4
0.00381109	-2.4045	PLP2
0.00450502	3.30506	ATP4A
0.00355701	-1.87446	TSPO
0.00432459	-2.38385	BAX
0.00311467	-1.25765	RAP1B
0.00451076	2.93909	SLC7A4
0.00366532	2.24083	CCNG2
0.0037236	1.58117	CEP170B
0.00355238	-1.33213	SPTLC1
0.00313197	-1.63322	GNG5
0.00456376	-3.19688	ARL11
0.00456299	2.90614	LOC101928524///PRPF18
0.00460598	3.92294	CNTN6
0.00448509	-2.29594	SIK1
0.00459716	3.67269	ALS2CR11
0.00379444	-1.97658	CDK6
0.00319631	-1.33966	CDV3
0.00439817	2.92373	SLC25A22
0.00464181	6.9615	PVALB
0.0043084	-2.27407	MRPS16
0.00465302	2.91634	ABCB9
0.00443436	2.30686	DGKQ
0.00465753	3.18123	IBTK
0.00380489	4.08243	OPCML
0.00466218	2.92565	SLC32A1
0.00440971	2.19797	PTPN4
0.00320394	-1.19005	2024-09-15
0.00469153	3.05303	SLC38A1
0.00354342	-1.87014	HIST1H2BK
0.00465903	2.72599	PSG5
0.0047221	3.65135	S1PR5
0.00332894	-1.96742	MFSD1
0.003589	1.56171	DEAF1
0.00363931	-2.81886	ARRDC4
0.00436679	1.96269	ABHD8
0.00386109	4.51184	ZIC2
0.00329143	-1.29522	SERBP1
0.00368788	1.59634	JAKMIP2
0.00477757	3.34386	KLK10
0.00368948	-1.5794	MRPL42
0.00407222	1.79065	REEP2
0.00440723	3.14717	TMEM145
0.00479113	2.68986	RNF39
0.00426414	2.49229	FNDC9
0.0035586	-1.69615	RDX
0.00481288	-3.25401	DENND2D
0.00382667	-1.57173	RMDN1
0.00442919	2.58107	NPTXR
0.00452687	3.0529	SNPH
0.00479239	3.27141	LINC00690
0.00468116	1.9153	CNNM1
0.00378791	-1.775	FGF2
0.00321122	-1.69025	GPX1
0.00487303	-3.21821	KYNU
0.00487304	-3.9369	IL7R
0.00415865	2.0719	WAC
0.00375864	-1.40661	MGME1
0.00482318	3.15889	CECR9
0.00491327	-3.03946	DOCK2
0.00413907	1.75553	MAP1LC3A
0.00488332	2.72029	CRYGA
0.00392151	1.57425	FASN
0.00492033	3.74033	HAPLN4
0.00403643	1.75017	PPP2R5B
0.00491615	-2.67764	SDSL
0.00381743	-1.29498	ZNF22
0.00384167	-1.68588	VAT1
0.00392822	-2.87972	MIR21///VMP1
0.00347994	-1.85833	CCND2
0.00342892	-1.59417	FAM198B
0.00495666	2.6415	METTL17
0.00441433	1.89712	MZF1
0.00383072	-1.41807	SNX1
0.00426837	-2.09413	TP53I3
0.00403735	-1.59637	SH2B3
0.00498615	2.58605	SRRM3
0.00418985	-2.90071	AZGP1
0.00502344	3.03647	FLJ33534
0.00500295	-2.88413	CCDC63
0.0048396	-2.36478	GFPT1
0.00466723	3.69983	FNDC5
0.00430667	-2.22505	SLCO2B1
0.00506348	4.2595	ELAVL3
0.00321541	-1.73868	PTTG1IP
0.00419291	1.59003	NTRK3
0.00507827	3.96296	SRD5A1
0.00465424	2.13205	CACNA1I
0.00507606	2.71727	MCPH1
0.00509419	3.00085	XKR7
0.00369645	1.49052	RBFOX2
0.00510466	-2.81149	PABPC1L
0.0035725	-1.18518	KRTCAP2
0.00475549	-2.12344	RCSD1
0.00444213	2.04787	AMIGO1
0.00431388	-1.82087	RREB1
0.00419683	3.08881	C14orf132
0.00366242	-1.74404	IDH1
0.00455449	-2.54149	HMOX1
0.00489762	-3.46827	GLIS3
0.00446688	2.33203	ZNF204P
0.0036585	1.55985	CLASP2
0.00397082	-1.52956	SFT2D3///WDR33
0.00391276	1.76908	SOCS7
0.00519909	3.68538	PAK5
0.00422805	-2.262	CAPG
0.00514865	2.90048	LOC101928495
0.00424833	-1.84106	PTAFR
0.00513672	2.96927	CNTNAP2
0.00527759	3.64074	CDH12
0.00528337	3.25203	TLX3
0.00391241	1.69634	CCP110
0.0038879	-2.07765	CDKN2C
0.00531749	2.75576	CPNE9
0.00470075	2.95763	RGS20
0.0042054	1.45554	ARHGEF10L
0.00419531	3.08151	TRPM3
0.0042006	-1.45464	NUP37
0.00391299	1.28148	MAP2K4
0.00396788	1.36957	RPRD2
0.00509589	4.30528	PAX6
0.00423388	1.46271	CPSF6
0.00493647	1.80166	AP2A2
0.00406801	-2.04481	FCER1G
0.00415853	-2.48588	TIGAR
0.00541089	3.31097	ARFGEF3
0.00428328	-1.79816	FCGRT
0.00472552	2.4652	FGF14
0.0047128	-2.44849	BARD1
0.00398794	-1.44716	DNAJC15
0.00545025	2.80321	PARVB
0.00419471	2.12576	SSX2IP
0.00423507	-1.79982	FRMD3
0.00549264	-3.31989	CXCL8
0.00402923	-1.69221	IQGAP1
0.00449849	4.33733	STMN4
0.0037744	-1.49605	CYFIP1
0.00433751	-1.70023	PSMB9
0.00499508	-2.82787	ITGB2
0.00428584	1.76775	CAP2
0.00555176	3.7732	TMEM63C
0.00550378	3.40139	PNMA6A
0.00555938	-4.754	IGLC1
0.00551465	-3.3409	CXorf57
0.0046571	-2.80349	LAMA4
0.0040414	-1.2896	MTDH
0.00455928	2.14411	EPHB1
0.00496135	2.42586	KIAA0895L
0.00394041	-1.25493	MARCKS
0.00561285	3.13841	LHX4-AS1
0.00556066	2.20632	DGCR9
0.00563601	2.8328	CLP1
0.00563285	-2.76364	GATA2-AS1
0.00565558	3.49889	SAMD14
0.00565512	3.16068	PAPPA
0.00529106	2.1684	IDH3G
0.00455907	-2.35909	ACKR3
0.00425127	-1.51836	ASPH
0.00428719	-1.56386	ECHDC1
0.00537027	-2.12853	LYL1
0.00445582	-2.83234	RNASE6
0.00567688	2.84525	LINC-PINT
0.00458494	-2.53063	GBP3
0.00423027	-1.36755	VKORC1
0.00352385	-1.35419	RPLP0
0.00432107	-2.2771	C3AR1
0.00427881	-1.70749	HPS3
0.00556813	-3.22764	GIMAP2
0.00395	-1.64598	ANTXR1
0.0047184	-2.0057	PIK3AP1
0.00540518	2.58427	MRAP2
0.00417401	-1.73589	CBX3
0.00557377	3.11621	CASKIN1
0.00588779	2.70791	IGF2BP3
0.00382743	-1.88678	S100A6
0.00423291	-2.2758	RHOC
0.0059139	2.60281	PNLIPRP1
0.00528662	-1.86242	TMEM8A
0.00600298	2.49675	YIF1B
0.00485021	-1.72425	BNIP2
0.00599151	3.85032	GABRA4
0.0056996	-2.17742	LILRB1
0.00488885	1.78207	MECP2
0.00506675	2.0361	NDUFB8
0.00445594	1.28514	LPGAT1
0.00595388	6.38349	FAT2
0.0046702	-2.42618	FCGR2A
0.00604838	-3.77619	P3H2
0.00514856	-1.91789	GBAP1
0.00533535	-2.11393	PSMB8-AS1
0.0060659	3.00888	KCNC3
0.00436091	-1.24472	MIR4745///PTBP1
0.00546356	-1.80409	MOB1A
0.00470505	-1.35988	MITF
0.00609273	-3.00677	SOCS3
0.00458622	1.90534	SPATA2
0.00610388	3.15727	SLC4A3
0.00552317	-2.09632	EIF4EBP1
0.0061228	-2.93244	TNFRSF10C
0.00487031	-2.32913	JUNB
0.0040616	1.26899	TERF2IP
0.00576085	2.24331	CHD3
0.00494994	-1.87375	HLA-DOA
0.00505398	1.66902	ZNF529
0.00617793	3.34342	EQTN
0.00611532	2.94537	SYP
0.00617084	-3.01446	DOK1
0.00585546	2.73757	NXPH3
0.00439975	-1.72019	DDR2
0.00444422	-1.255	WASF2
0.00573245	-1.90539	PPP1R3B
0.00623555	2.92815	C16orf95
0.00624198	-2.75088	BTK
0.00588344	2.14386	TMEM74
0.00625003	2.9894	TRAF7
0.0044906	-1.22193	KCTD3
0.00602702	-4.3406	TGFBI
0.00500341	-2.58795	DSE
0.00458727	-1.23276	SMC1A
0.00490284	2.35681	ELOVL4
0.00629293	-2.69142	DDX60L
0.00409804	1.25785	LANCL1
0.0048014	-1.34347	TMCO1
0.00501454	1.55474	C6orf136
0.00432322	-1.29167	PTPN12
0.00444165	1.38455	WDR47
0.00423167	1.48872	CCSAP
0.00552374	1.72215	ABCG4
0.00519899	1.51794	UBE2V2
0.00362292	-0.986048	SNORD96A///SNORD95///RACK1
0.00467903	-1.59436	GOLIM4
0.00540799	2.01783	TPD52
0.00428706	-1.36295	QKI
0.00639159	3.64115	VWC2
0.00641238	-2.99368	NUDT16P1
0.00642805	-3.1024	NABP1
0.00552646	-2.90687	PDPN
0.00496222	1.57628	FBRSL1
0.00645633	2.54301	2024-03-11
0.00649033	4.29055	GPR26
0.00649313	2.67158	LOC100505685
0.00497031	-1.52959	UBALD2
0.00655139	-2.59667	MAP3K8
0.00450451	-1.84982	HLA-E
0.005611	-1.57651	FGFR1OP2
0.00639438	-2.87882	CARD16
0.00659058	2.96183	IFNA13///IFNA1
0.00659499	3.08643	LOC100129175
0.00659616	2.57398	BRS3
0.00503196	1.9026	MYO5C
0.00662344	3.06535	SP2
0.00606243	-2.82205	PCTP
0.00611936	-2.61963	PARD3B
0.00465369	-1.49421	RB1
0.00571496	-2.01764	FLI1
0.00452508	-1.27464	LEPROT
0.00521513	-1.55804	ERGIC1
0.0047929	1.73585	ATP2B1
0.00556628	2.5912	NSG1
0.00557379	-2.38033	PLXDC2
0.00668011	2.62787	LOC101928718
0.00667409	-2.52435	CRLS1
0.005854	-2.17245	TAPBPL
0.00486841	-1.58273	HIST1H2AC
0.00669879	3.46271	MAGI2-IT1
0.00671196	-2.99473	LOC101928615///FNDC3B
0.00671645	-3.7668	IER5L
0.00490919	1.49368	TP53BP1
0.0061259	1.89224	KRT18
0.00675237	2.6907	LOC150005
0.00677349	2.80009	DNAJB8-AS1
0.00556526	2.12632	KIFC2
0.00677525	4.20361	ZIC4
0.00680433	-2.63163	SH3RF1
0.00680378	2.75936	ZBED9
0.00522573	1.52578	PDS5B
0.00611138	2.94121	LOC284219
0.00680986	2.36263	G6PC
0.00683688	2.54617	PRSS2
0.00502671	-1.41887	PECAM1
0.0068614	-2.72325	ADAMTS12
0.00589792	-2.1174	SH3RF3
0.00496185	-1.71366	CRYZ
0.00689182	2.9323	PRPH2
0.00544131	1.38088	LHFPL4
0.00485843	-1.26338	POLR3GL
0.0043274	1.7068	QDPR
0.00691312	-2.61173	LOC101927516
0.00554298	-1.53912	POLI
0.004908	-2.37776	C1QC
0.00694616	2.91008	DKK4
0.00693482	-2.99667	CSTF3-AS1
0.0056646	1.71583	CIART
0.00697812	2.97563	RPS10P7
0.00697896	-2.48174	PLK3
0.00528157	-1.7171	FILIP1L
0.00699531	2.74915	DHX30
0.00490755	-1.14449	WDR26
0.00701052	2.86184	GALNT3
0.00532629	-1.56304	IMMP2L
0.00702032	2.63226	CXCR1
0.00704085	-2.94713	EXOSC3
0.00491972	1.22424	DMXL2
0.00704613	2.9998	POT1-AS1
0.00705268	-2.56179	PCSK5
0.0070555	-2.79713	JAG1
0.00705489	2.75532	SPATA33
0.00702134	2.93916	NCOA3
0.00665506	2.44157	CBFA2T3
0.00470802	2.87346	SCG5
0.00706429	2.87354	ESYT3
0.00601561	2.01063	NPM2
0.00533852	-1.9791	C1orf162
0.00708408	2.50557	LRRFIP1
0.00517337	1.80203	SSBP3
0.00527356	2.41806	KIF1A
0.00678706	3.12974	NKAIN2
0.0054512	-1.91389	MYC
0.0071024	-2.89549	TGFBR1
0.00487195	-1.34969	GNAI3
0.00516323	1.30087	ATP6
0.0056632	2.75029	ANKS1B
0.00712143	-2.42299	MTMR11
0.00456958	-1.53427	FERMT2
0.00713267	-3.73155	CXCL10
0.00618857	-1.99134	NECTIN3
0.00509963	-1.88652	FAM46A
0.00506934	1.28609	SNU13
0.00710095	-3.41127	LINC00839
0.00642537	-2.23166	TLR3
0.00570818	-2.03335	UCP2
0.00604236	1.52257	CYB5B
0.00720133	-2.87035	HIST1H4J
0.00724688	-2.82899	NSUN7
0.00725615	2.88772	MIR3934///UQCC2
0.00541478	1.30144	MADD
0.0056179	1.58272	SCAI
0.00519068	-1.25369	SLC15A4
0.00451229	-1.25177	SEPT2
0.00540814	1.31135	CTNNBIP1
0.00730431	2.67439	LUZP1
0.00729091	-3.31682	FOXD3
0.00727715	3.03018	ZC3H7B
0.00728023	-2.68398	KIZ-AS1
0.00558561	-1.56463	NOL12///TRIOBP
0.00546244	-1.48073	CREM
0.00731942	2.66571	LOC79999
0.00732993	2.78212	LOC100499489
0.00696449	-2.36197	SOX2
0.00481542	-1.05852	HNRNPC
0.00730115	3.05333	FAM189A1
0.00614006	-1.82826	HPGDS
0.00567782	-1.4231	C7orf55-LUC7L2///FMC1///LUC7L2
0.00735202	-2.97815	INPP5D
0.00502219	-1.35339	MIR3652///HSP90B1
0.00605226	1.50188	PITPNM1
0.00573307	-1.78428	SLC35D2
0.00620853	4.59052	RALYL
0.00568876	1.442	LOC101930416///LOC101929792///LOC100996724///PDE4DIP
0.00447014	-2.04469	CD74
0.00627486	2.13275	DLG1
0.00681949	-2.44612	TSNAX-DISC1///DISC1
0.00742798	2.66832	SNX29
0.00545883	1.47948	PGBD5
0.0053009	-2.48981	CTGF
0.0058569	-1.87212	WSB1
0.00725393	-2.90118	LOC101928269///LOC100506403///RUNX1
0.00501936	1.60286	TBC1D9
0.00745943	2.89878	LINC00917
0.00595804	1.96219	NR1D1///THRA
0.00485456	1.2389	CADM1
0.00472277	-1.18264	YBX1
0.00751009	2.88764	CUL7
0.00747748	-3.79484	ADAMTS1
0.00752292	2.78128	HAGLROS
0.00750134	2.84728	ANKRD52
0.00508493	-1.22547	ROMO1
0.00755911	2.81781	TONSL-AS1
0.0050537	-2.02519	CSGALNACT1
0.00756093	3.74437	BLACAT1
0.00543606	-1.99688	CMTM6
0.00670557	-2.3181	NOTCH2
0.00753282	-5.50881	CCL2
0.0076087	2.72845	FAM66D
0.00587233	-1.5188	RARS2
0.00672853	-2.40106	HERC5
0.00569605	-1.24393	GLTP
0.00665848	1.69751	ZFYVE16
0.00590628	-1.45187	ASAP1
0.00537957	1.31529	SLC4A5///DCTN1
0.00496149	-2.43371	HLA-DPB1
0.00647745	-1.93992	SERPINA1
0.00510959	-1.1703	GOLPH3
0.005166	-2.09177	ZFP36L1
0.00709664	-2.83534	CYP27A1
0.00691961	-2.81227	SHC4
0.00497397	-2.07911	TXNIP
0.00496309	-1.1718	COMMD6
0.00763112	-2.09939	CARS
0.00779184	3.11435	PRCD
0.00424135	-1.14724	CRYAB
0.00781326	-2.53969	MIR6787///SLC16A3
0.00609887	-3.28352	LOC100509457///HLA-DQA2///HLA-DQA1
0.00785047	3.51903	RHBDL1
0.00782186	3.76684	HMGCLL1
0.00603772	-1.77678	TOX
0.00591227	1.53866	ZNF248
0.0051067	-2.13788	GPR34
0.0060666	-1.44229	NUP160
0.00628052	-2.81751	WLS
0.00537689	-1.24952	C5orf15
0.00797885	2.48398	LOC101927539
0.00606372	3.2103	GPM6A
0.00594561	-1.61074	ASCC3
0.00671912	1.88228	RYR3
0.00734121	-2.33855	ANG
0.00661451	2.2858	CAMK2N2
0.00699861	-2.12199	SLC11A1
0.00683137	1.69575	RPS6KL1
0.00489043	-1.05552	ELOVL5
0.00769436	3.08201	RFPL1S
0.00620324	2.91721	KLHL3
0.00638804	2.01211	HLF
0.00811088	2.88562	USP26
0.00647807	1.53152	RPL15
0.00803154	-5.37081	POSTN
0.00471087	-1.57402	HLA-A
0.00812887	2.83661	PLD5
0.0081074	2.63331	TTTY6B///TTTY6
0.00540829	-2.21354	ARHGEF6
0.00700561	1.85158	PELI3
0.00816541	2.56954	PRKXP1
0.00600445	1.31976	TRPC1
0.00675757	-1.99182	CDH11
0.00652373	-2.69792	LOC101929796///LOC100996763///LOC100996717///NOTCH2NL///NOTCH2
0.00813996	-3.01518	CSF2RA
0.00667618	-1.69285	LPP
0.00825217	2.89427	USF3
0.00794297	2.65706	TENM2
0.00681248	3.3897	NRXN2
0.00578626	-1.63175	GBE1
0.00561318	-1.21758	TXNDC15
0.00822851	2.84474	KCNK3
0.0056616	-1.29637	AIDA
0.00562444	-1.13755	CORO1C
0.00833762	2.82313	ANGPTL3
0.00571174	-1.15894	AK2
0.00837122	2.73387	XRCC3
0.00839269	-2.74371	LOXL1
0.0083904	2.65315	PRDM16
0.00837135	3.02273	LPAR3
0.00840646	2.71352	OR7A17
0.00803288	2.21275	FBXL18
0.00730948	2.47105	CNTN4
0.00660635	-2.19662	KLF10
0.00745535	2.06069	CUL3
0.00644263	-1.86216	NEK6
0.00597111	1.84538	TMEM144
0.0074766	-2.68235	CSTA
0.00683903	-1.75671	CCNYL1
0.00554375	-1.20792	LAP3
0.00851058	-2.81637	GBP5
0.00579411	-1.36536	ELK3
0.00561256	1.41356	SNRK
0.00845982	2.45732	NDST3
0.00719114	-2.31342	FYB
0.00852879	-2.71056	PRAM1
0.00506614	-1.70698	ITGB8
0.00857599	2.79311	IL4
0.00653717	-1.96945	DIAPH2
0.0074978	1.67369	PRRT3
0.00858951	2.48206	IGF2BP2-AS1
0.00822358	2.22946	LOC101930343///CATSPER2P1///CATSPER2
0.00640276	-2.13163	SLC7A7
0.00849589	3.76095	IL20RA
0.00844607	2.1186	PYDC1
0.00613728	2.7703	REEP1
0.0079551	2.62594	STRIP2
0.0082852	-1.9414	CDYL
0.00572808	-1.30924	SEC61G
0.00698707	-3.50033	COL5A2
0.00861136	3.25589	RORC
0.00862187	4.07969	KCNK9
0.00867633	3.05491	ZNF233
0.00586525	-1.69599	TEAD1
0.00871015	-3.14313	POU4F1
0.00871762	2.60763	USP48
0.00850854	2.11388	NEUROD6
0.00866452	-3.16766	ARHGAP45
0.00860263	-2.82878	WEE1
0.00856762	5.98555	LOC101927137///KIAA1456
0.00871669	4.21319	HCN1
0.00655641	-1.7321	FLNA
0.00618545	-2.35424	TRIM22
0.00757066	1.62805	GOLGA2P5
0.00586814	1.2762	DDHD2
0.00876179	-4.11185	ADAMTS9
0.00782945	-1.83936	KIAA0226L
0.0088699	3.32815	DLGAP1
0.00684084	-1.55094	C8orf44-SGK3///SGK3
0.00765026	1.6978	MAPK11
0.00720028	-1.78289	DIRAS3
0.00777344	-2.9312	GPR65
0.00749877	2.10031	LOC105369477
0.00732689	-1.71215	ZMYM6
0.00786586	1.63745	GALNT16
0.00891108	2.6584	C21orf2
0.00654982	-1.79136	LIMS4///LIMS1
0.00862636	2.15144	THSD4
0.00579319	-1.26641	NLGN4X
0.00746445	2.34029	KLC2
0.00634214	-1.60677	ORMDL2
0.00900612	-2.53096	ST3GAL1
0.00897086	3.34915	ASIC2
0.00626652	1.47985	ARHGEF9
0.00718257	-2.16466	JUN
0.00851713	1.93043	OBSL1
0.00896813	2.91632	CDH22
0.0058616	2.15666	TRIM2
0.00904943	-2.82427	MOV10
0.00693909	1.92382	DUSP26
0.0067646	-1.31135	SS18
0.006554	-1.60535	CHST11
0.00682862	-1.95617	ADM
0.00907159	3.26172	NWD2
0.00658691	1.63983	LOC100506548///RPL37
0.0091062	2.57072	CHKB-CPT1B///CPT1B
0.00653589	-1.51967	P4HA1
0.00688985	-1.89159	SOWAHC
0.00591177	1.76589	GOLGA8A
0.00560437	1.19566	NDRG3
0.00707299	-2.02002	PPIC
0.00732099	1.69542	SLC25A23
0.0084943	1.79039	SH2D3C
0.00911348	3.57803	RASGRF1
0.00819579	1.74336	ULK1
0.00639882	-1.54298	RHOQ
0.00910096	-4.74651	IQGAP2
0.00683223	-1.29	LTBP3
0.00744298	4.98135	GAD1
0.00770409	1.97228	TMEM56
0.00927066	2.42929	PROSER2-AS1
0.00591603	-1.28413	OST4
0.00759066	-1.82404	HK2
0.00629237	1.29759	CALM1
0.00609191	-1.17837	PFN1
0.0092892	-3.2109	KCNE4
0.00714774	2.86867	BRINP1
0.00646339	-1.24181	THSD7A
0.00779574	1.77911	ZNF280B
0.00931475	2.96691	CNTN2
0.00930139	2.8797	SLC6A12
0.009354	2.73783	DMP1
0.0089383	-2.24717	CHPF2
0.00889772	-1.96551	WDFY4
0.0065878	-1.19649	PIK3R1
0.00938844	2.91344	CD19
0.00937537	2.6069	LOC100996506
0.00935519	-2.71112	SLC4A2
0.00928295	2.15736	KIAA0408
0.00943678	2.8542	PACRG-AS2
0.0061929	-1.74009	CAT
0.00947495	-2.45519	MILR1
0.00614613	1.14941	ATL1
0.00614076	-1.17815	RAB9A
0.00783631	-4.01914	COL3A1
0.00849511	-2.2055	FLOT1
0.00950542	2.9243	ABCA5
0.00674845	1.58568	GDPD1
0.0095235	-2.62185	NCF4
0.00662858	-1.29183	HAUS1
0.00957844	3.12714	IL17F
0.0095008	-2.82284	EVA1A
0.00691945	-1.25054	TAP1
0.00655406	1.35813	JARID2
0.00617015	1.21328	ATXN7L3B
0.00962005	2.66963	SNRK-AS1
0.00744204	2.63396	CENPV
0.0085898	-1.83662	KDELR1
0.00963427	3.31726	FBXO3
0.00668854	1.60381	ICA1L
0.00603447	2.01212	OLFM1
0.00653787	-1.27038	ARHGEF40
0.00634363	-2.04286	FSTL1
0.00880061	1.98518	RHOF
0.00972929	2.83218	LOC101927131
0.00716007	1.37259	PLA2G4B///JMJD7-PLA2G4B
0.00626407	-1.21363	REXO2
0.00692718	1.56571	SPRYD3
0.00806281	-1.45069	CRTAC1
0.0074307	2.38048	ESRRG
0.00984597	-2.6426	MYL12A
0.00954361	-2.95455	TLR7
0.00680834	-1.33471	HEATR5A
0.00981993	-3.59587	UST
0.00985234	3.04636	RAB3B
0.00667436	-1.77854	LHFPL2
0.00768991	-1.40724	IFNAR2
0.0099576	2.97647	SMIM2
0.00876814	-2.1098	IKZF1
0.00896801	2.17073	GRIN2C
0.00645517	1.11891	GPI
0.00990682	3.31897	PDE4D
0.00702348	1.15003	RAB40C
0.00996507	2.97757	BTG1
0.00657899	-1.3154	BRI3
0.00988007	-4.34003	LOC101928916///NNMT
0.00996373	-2.70244	NEXN
0.0100717	2.7575	GSN-AS1
0.00601194	-2.43105	LGALS1
0.00890019	-2.14241	IL6R
0.0101215	2.51012	ATP6V1C2
0.00750995	2.55946	RIMS2
0.00708155	-1.32513	KDELR2
0.00604223	-1.10982	RHOA
0.00650846	2.8506	NELL2
0.0101685	2.55895	TAPT1
0.0102211	2.55756	C6orf10
0.00808208	-2.09413	UTRN
0.0101514	-2.71872	LILRB3
0.00600058	2.44505	ZBTB18
0.0102128	2.74727	TSGA13
0.00866444	3.00463	STEAP2
0.00780382	1.42379	UBE2J1
0.0101696	2.83131	MTMR7
0.00810817	-1.55945	ACER3
0.0103639	2.37439	ZNF546
0.00870768	2.26631	AP1G2
0.0103566	2.70285	GLB1L3
0.00712629	1.44369	U2SURP
0.00681752	1.42499	FNBP1
0.0101934	-2.49739	SIGLEC7
0.0093311	2.00632	SYT11
0.00759305	1.28967	TMEM183B///TMEM183A
0.0103569	2.71226	LINC01532
0.00632328	-1.34615	ARPC3
0.00665681	-1.14657	COPB2
0.00876623	-2.40636	MPEG1
0.00701525	1.40621	FKBP4
0.00744996	-2.13802	ADORA3
0.0104731	-2.54764	MMRN1
0.0103369	-2.24318	CANT1
0.00711921	1.19276	SNORA29///TCP1
0.00806101	-2.04686	MNDA
0.0082976	1.55454	PPP6R2
0.00656497	-1.1249	ROCK1
0.00812865	-1.40654	PGGT1B
0.00665947	-1.47031	ALG5
0.00705578	-1.358	BZW2
0.00720377	1.34005	TULP4
0.00677156	1.46285	HNRNPUL2-BSCL2///BSCL2
0.00784312	1.44224	RNF175
0.00864734	-1.92263	SERPINB1
0.0106304	2.85751	LOC101929517
0.0106623	3.11107	PHF2P1
0.00932627	-1.88545	GLMP
0.00720334	-1.35325	SGMS1
0.010608	3.26428	LOC221272
0.00766887	1.40326	PHLPP2
0.00678028	-1.11768	ANP32B
0.00951182	2.17363	SMIM10L2A
0.00976285	-2.50641	AEN
0.0107209	-2.46462	FAM175A
0.0107335	-2.33999	DEF6
0.0064222	1.04207	ATP6V0C
0.00678865	-1.22933	PLS3
0.0088919	1.63666	DOPEY2
0.0107733	2.79712	OVOL2
0.00804776	-1.6757	GMFG
0.00869683	-1.74206	TNFRSF1B
0.0107224	2.89001	ISYNA1
0.00748105	2.03703	TSC2
0.0105312	4.0045	SPOCK3
0.00715394	1.24094	MAPRE2
0.0108248	2.5669	ZNF214
0.00709318	-1.29063	ATL3
0.0107644	2.87814	SNX32
0.00905456	1.60973	SOBP
0.0107889	2.84954	LOC105374768
0.0108435	-2.60551	PVR
0.00856624	-1.58028	DRAM1
0.00784014	-1.68707	GRN
0.00731848	2.42179	RAB6B
0.0082577	2.56768	MAPK10
0.0108968	-2.54166	CENPI
0.00948717	-1.92819	SZRD1
0.0108559	2.87547	LOC105378470
0.0106968	-2.8229	OSBPL3
0.0100523	-2.20967	ENG
0.0109404	-2.466	SCFD1
0.0108877	2.7127	C15orf59
0.00690455	1.10907	STUB1
0.0109418	-2.29935	ARSB
0.0109444	2.82907	TFF1
0.0078697	1.49338	PER3
0.0110334	-2.48877	PCBP1-AS1
0.00868195	-1.90735	TNFSF12-TNFSF13///TNFSF13
0.00867503	-1.50217	PPIL4
0.00766207	-1.47794	SOCS2
0.0111031	2.82963	ADSS
0.00923251	-2.36068	SVIL
0.0109013	2.37224	SNCG
0.0110448	2.56186	EML2
0.0110937	2.39614	LOC101928910///FAM66C
0.0111301	2.36132	PCDHGC3
0.00988302	1.83705	HCG8///ZNRD1ASP
0.0111395	2.69207	CYB5RL
0.00834461	-1.3555	DNAJC10
0.0110546	-2.76356	HCP5
0.00732887	-1.118	PDIA6
0.00826897	-1.40338	RIOK3
0.00718318	-1.29342	SPTSSA
0.00970295	-2.22623	RGS18
0.00874048	-2.12188	STAB1
0.0111276	2.54082	KIRREL3-AS2
0.00736786	-1.49196	CTSO
0.00898478	-1.52306	L3HYPDH
0.00741706	1.34566	CAMSAP1
0.0110598	3.15879	LOC101927338///KCNQ1OT1
0.0108925	-2.89618	FZD2
0.0111162	2.89327	ACOT11
0.00747413	1.51476	HOMER1
0.011198	3.02746	FANCD2
0.00808734	1.46807	CDK16
0.0111911	2.6496	KDM5B
0.0112484	-2.74936	EHD4
0.0111512	2.92814	TRAPPC10
0.0112664	2.66515	LOC105372953
0.00852667	2.70482	LRRC3B
0.00946432	-1.74019	RAB8B
0.0110602	2.1117	PMPCB
0.0108535	6.3245	ST18
0.00850719	-1.96164	OSGIN2
0.0112486	-2.61423	PARVG
0.00736245	-2.10814	HLA-DMB
0.00992402	2.01523	DGCR5
0.00864048	-1.37905	RAD50
0.00802853	-1.86407	RNF135
0.00729842	1.30725	ARHGEF3
0.0112948	3.28597	LOC101926887///LIPA
0.00810419	-1.73933	SUCLG2
0.00767086	-1.45104	CKLF-CMTM1///CKLF
0.0110568	4.03951	CAMK2A
0.0114193	2.62491	PPP1R37
0.0107993	-2.94337	PLXND1
0.00999343	1.69017	CRHR1
0.00933853	-2.32176	CARD16///CASP1
0.0113797	-3.28854	JCHAIN
0.0115293	2.69313	WNT7A
0.00754733	1.29939	CD200
0.00897236	1.44638	MROH1
0.0111503	2.69382	RIMS4
0.00970543	1.85726	SLIT3
0.0110788	2.06321	UBAP1L
0.00686479	-1.04634	SF3B6
0.0074353	2.47409	NRXN3
0.00792894	1.59211	CDIP1
0.00938973	1.74867	ATN1
0.00673411	1.10339	ATP6V1A
0.0116321	2.56176	DNAJB8
0.0116135	2.57613	FEM1A
0.00864995	1.31151	IGSF8
0.0116621	-2.32932	CADM4
0.0092663	1.35916	EFNA5
0.0117378	-2.55347	LOC101928882///CCDC39
0.00715699	-1.26241	TPP1
0.0114755	4.94008	SPX
0.0117003	2.47468	C4orf17
0.00899364	-2.43119	GPC6
0.0115851	-2.19793	ING1
0.0118498	2.59446	NPIPA5///NPIPB5///NPIPB11///NPIPB8///LOC613037///NPIPB4///NPIPB3
0.0110627	2.18476	NDUFA10
0.0118306	-2.36377	STK17B
0.00769458	-2.03409	FGL2
0.00868619	-1.53503	FAM111A
0.00999175	-1.80631	CCR1
0.0104972	1.79975	FBXO16
0.00758846	-1.69732	LITAF
0.00848477	1.29322	CIC
0.00808038	3.88715	FUT9
0.0119239	2.78607	GCOM1///POLR2M
0.0118884	2.23967	GFRA2
0.0118867	-2.44624	LUZP4
0.00870077	-1.46917	MRPL19
0.00704274	-1.05608	SNRPG
0.0119078	2.92644	ARHGEF28
0.00725973	1.18751	CLIP3
0.0119842	2.35699	OR51M1
0.00843253	-1.15231	GUCD1
0.0079942	-1.44156	MEX3C
0.0121186	2.82729	LINC00901
0.00816749	-1.78756	ID2
0.0121175	2.33788	IKZF2
0.00801747	2.10268	CNTN1
0.0120807	2.84649	RNF144A
0.0116658	2.30814	RPL17-C18orf32///SNORD58C///SNORD58A///SNORD58B///RPL17
0.011995	-2.42997	RELA
0.00990751	1.71832	RUSC2
0.00773426	-1.3468	BTN3A2///BTN3A3
0.00818307	-1.74342	SLC5A3
0.007175	-1.10949	NFKBIA
0.0121366	2.51159	PDE11A
0.00901941	-1.38331	LAMB2
0.011921	3.69501	HECW1
0.0115754	2.11489	LOC105369921
0.00713181	-1.17257	VAMP3
0.0082997	1.66509	MAPKBP1
0.00871373	-2.24692	CAV2
0.0122075	2.54882	FGF18
0.0120842	-3.15873	ABCB4
0.00870184	1.69684	TARBP1
0.0122733	2.84527	LMOD3
0.0121956	-2.69295	POLR2L
0.0107645	-2.18601	CCR5
0.00701432	-1.02325	PABPC3
0.0122363	-2.84517	ELF4
0.0124095	2.93747	LINC00665
0.0104711	-1.90513	GIMAP7
0.0123587	2.61211	SDHB
0.0124667	2.42136	LOC101929143
0.010775	2.05087	NOXA1
0.00766559	1.21672	PPM1A
0.012519	2.44827	PRDM8
0.0083469	2.98099	MTCL1
0.00828967	-1.30815	C1orf21
0.00752357	0.993156	DNM1L
0.00895491	1.85231	NEBL
0.00971921	1.34204	RNF115
0.0107003	1.71972	LOC101930608
0.0111899	2.44387	SLC8A1
0.0126099	3.19603	THADA
0.0125271	-2.46307	NFE2L2
0.0125986	2.77225	DACT3-AS1
0.00789412	-1.05307	C6orf62
0.0089484	-1.41478	CKLF
0.0115848	-2.08077	SIVA1
0.0126712	2.39141	ZNRF4
0.00958258	-2.57583	KLF6
0.0126845	-2.32839	TBXAS1
0.00782703	1.91348	SYBU
0.00939696	1.27625	TUBGCP4
0.0128597	-2.31938	PGPEP1
0.00847891	1.07794	LOC101927673///OTUB1
0.00934126	-2.19495	CYBA
0.0129042	-2.99212	LOC645984
0.0120538	2.31645	CACNB1
0.00807458	1.33561	HPRT1
0.0106442	-1.9184	DPY19L1
0.00873139	1.25689	SEPT7
0.0114262	4.72586	GJB6
0.0128139	2.97898	EPG5
0.00802159	1.46563	USP32P2
0.0110311	-2.13539	SSFA2
0.0084326	-1.69799	RGS10
0.00828595	-1.2536	GALNT1
0.00915841	1.38357	LNP1
0.0130553	2.92495	MIR2682///MIR137///MIR137HG
0.00897663	-1.35892	ASUN
0.00727186	-1.02197	RHOBTB3
0.00798304	1.20839	C11orf58
0.0125421	-2.31671	STT3A
0.0126742	-2.51568	QSOX1
0.00861161	-1.7346	FAM114A1
0.00920629	-1.17426	PGM3
0.00862326	1.33367	PDXK
0.00806156	-1.27959	SNRPB2
0.00843333	-1.37421	RASSF4
0.0129516	3.18842	NCR3LG1
0.0132812	-2.83567	NR5A2
0.0133244	-2.36226	LOC728175
0.0131358	2.81878	KLHL1
0.00984213	1.51424	LINC01089
0.00915505	-1.19658	MIR6748///TMEM179B
0.00978544	1.87002	KCNIP2
0.0120911	3.30104	MPP3
0.0101474	1.90803	ACAP3
0.0122124	2.00306	SGK494
0.00845578	-1.23432	ARPC5
0.0128651	2.82058	PYGM
0.0132695	2.19336	AIF1L
0.0111813	1.72302	LOC101930416///LOC101929792///LOC100996724///LOC653513///PDE4DIP
0.0132458	3.19202	RPRML
0.0133462	3.25361	SLC26A4-AS1
0.0132966	2.9934	CCDC30///PPCS
0.00919342	2.03624	LOC101930415
0.00879064	1.08512	MTMR9
0.00931886	2.70286	FZD7
0.0134818	2.29165	MGC39584
0.00763882	-1.37171	HSPA5
0.0134436	2.58428	PROM2
0.00879325	1.22725	MLLT6
0.00977737	1.3814	ACTR3B
0.0133947	-2.94973	OSR2
0.0134541	2.85384	SLC25A2
0.00776342	-1.11254	C14orf166
0.0102469	1.32169	DSERG1
0.0135246	2.90704	OR2B6
0.0089984	-1.19867	MAP4K5
0.0114635	1.58354	FBXO45
0.00865566	1.61482	KIF3A
0.00850161	-1.78421	CSF1R
0.00998922	2.67739	TENM1
0.00846617	2.5554	SLC6A1
0.00882437	-1.30412	PTBP1
0.0119444	3.14919	MRLN
[truncated: 20,188 more rows]

## Sheet: DEGs of Liver tumors
adj.P.Val	logFC	Gene.symbol
1.27184e-05	6.16607	KLK11
8.07133e-05	5.03414	RSAD2
4.38363e-05	-5.20256	NRXN3
8.28611e-05	-3.6073	SOX4
0.000102701	-4.16552	GRID1
6.59443e-05	5.19802	GBP7
0.000150215	-4.59064	TMEM266
0.000159306	4.54291	FGF19
0.000195132	4.87794	SEMA3E
0.000204057	4.33088	IGHV5-78
0.000308289	2.38783	FCER1G
0.00020628	-3.43264	ENAH
0.000292663	3.39976	CFD
0.000208979	4.06942	KRT19P2
0.000197479	-3.76747	SERPINE1
0.000226811	-3.41486	NREP
0.000211358	-3.61752	FAT1
0.000269012	3.19538	CD40
0.00029965	3.03346	CD38
0.000229807	4.08159	LIPH
0.000240705	3.41527	FAM150A
0.000221378	3.7228	RIC3
0.000397518	2.48945	LILRB3
0.000278203	3.50404	SLC44A4
0.000392954	2.43487	CD68
0.000309323	3.53385	ERVH-3
0.00040912	2.80431	CCRL2
0.000227413	3.96036	IGK///IGKV3-20///IGHV3-23
0.000337193	3.87197	SLC9B1
0.000281086	-4.07382	KIAA1549
0.00048376	2.0623	CD44
0.00046394	4.08026	CCL8
0.00016201	5.41454	GALNT12
0.000227469	-4.47578	GJC1
0.000503779	2.61746	CCR1
0.000375158	3.12832	GRHL2
0.000461093	3.77505	CCL7
0.000524014	3.07763	SNX10
0.000495472	-5.95326	FNDC1
0.000395466	-3.23429	SPRY4
0.000572	2.45337	CD53
0.000375308	7.0779	TACSTD2
0.000361792	5.45118	KLK10
0.000355358	3.57714	CSF3
0.000604902	2.16038	BASP1
0.000378865	-3.39646	LIN7A
0.000359588	4.37916	IGHV3-30
0.000548569	-4.44278	C3orf80
0.000449741	3.44816	SAA2
0.00056727	4.71259	FAM83B
0.00045768	3.03174	PRRG4
0.000464011	-3.26368	GALNT18
0.000504281	3.5575	IGLL5
0.000691654	1.88162	CTSB
0.000618971	5.01908	RAB25
0.000540008	3.0494	WFDC2
0.000563387	-4.76515	COL5A2
0.000482852	5.75832	ANXA10
0.000666018	-3.91187	LIF
0.000590566	3.43869	IGLV1-44
0.000621612	4.35247	SMIM22
0.000585343	-3.38655	NXPH4
0.000505612	-4.62189	PCDHB14
0.000539965	-3.79576	MEX3A
0.000738267	2.65409	DENND2D
0.000617264	2.85173	DPP10-AS1
0.000659511	3.29693	CNTN3
0.000722302	4.9341	CFTR
0.000729794	-4.30981	TUB
0.000790712	2.31595	OAS3
0.000690266	3.11035	NDST3
0.000636663	-3.24635	ROBO1
0.000841404	2.16364	RAC2
0.000695703	-2.72059	ITIH5
0.000721999	3.53869	SAA1
0.000754174	-3.44335	ABCA4
0.000804094	3.62764	LAG3
0.000830202	-4.02757	ARSI
0.000918732	1.8811	CTSS
0.000747834	-2.82864	GABRE
0.000521167	3.61584	SLC4A4
0.000764679	3.20717	ADGRB1
0.00082973	-3.47164	ANO4
0.00080312	3.114	CASR
0.00084178	8.02122	KRT19
0.000974024	2.09353	NR1H3
0.000900988	2.52718	LILRA4
0.00088475	-2.29343	PDGFB
0.000919954	-2.22879	GPC1
0.000851913	-3.34299	PXDNL
0.000926712	3.20712	PHACTR1
0.000914625	-4.34948	LYPD1
0.000944981	5.01182	ADGRF1
0.000782907	-3.36154	CRNDE
0.000616838	5.4182	CLDN4
0.000568843	-3.95943	MYCN
0.000932186	3.55459	CD80
0.000892416	2.90377	PKD2L1
0.0009645	3.65276	RNF39
0.000841877	4.96656	TFF2
0.000760741	3.4623	PKP3
0.000787711	-5.0303	THBS4
0.00101478	2.45814	MSR1
0.00095335	-2.9557	TACC2
0.000946905	-2.56455	SIPA1L3
0.00109424	1.94328	PLD3
0.00108733	2.52919	IGSF6
0.00103866	-2.70004	RBPMS
0.0011287	2.08663	CASP1
0.000951475	4.19737	LOC100506098
0.000690437	3.42808	GALNT3
0.00103955	2.53053	POF1B
0.000980963	-2.90985	LIMS3-LOC440895
0.000877005	3.20197	HCAR2
0.00121107	-1.75733	RPLP0P2
0.00118642	-4.52214	DCLK3
0.00115426	-2.50232	SGCE
0.000996622	2.70122	IGKV1D-8
0.00112588	-2.38784	LOC100506317
0.00109218	2.90476	CLEC7A
0.00121147	2.53926	LILRP2
0.00085312	-4.80008	IRX3
0.00110669	4.22567	FBXL17
0.00131889	2.11612	CREG1
0.00128994	2.26647	IFIT2
0.00119031	2.34366	DAPP1
0.00117981	2.36385	GNPTAB
0.000958065	3.96522	IL1RN
0.00128629	-4.1017	HAGLR
0.000897313	-3.53485	ZNF667-AS1
0.00137978	2.35763	CXCL16
0.00133728	2.31821	USP30-AS1
0.00126913	-2.31109	MAP4K4
0.00121951	3.41174	CRTAM
0.00130152	3.07633	FAM30A
0.00142578	1.92623	SAT1
0.00132167	4.63597	JCHAIN
0.00122139	-2.67287	C1QTNF6
0.00135963	2.44761	IGLV6-57
0.00149408	2.87557	RARRES3
0.0014937	3.76369	IGLL1
0.0013918	2.23657	SFRP5
0.00147388	4.17237	DMBX1
0.00145036	3.27873	KCNH8
0.00145697	2.79815	DRAM1
0.00115595	2.96939	DSCAM
0.00124328	6.61823	FA2H
0.00144136	-3.00423	KIAA1257
0.00145111	-3.06184	COL22A1
0.00143802	-2.95235	PARVA
0.00152819	2.20463	CCL4
0.00144582	-2.7314	ADAM23
0.00142153	2.74611	FAM134B
0.00158516	2.03419	IL15
0.0014894	2.56738	TBX21
0.0016119	2.19726	GPR137B
0.00154944	3.18601	OAS1
0.00154381	1.92575	CTSL
0.00151554	2.21271	LYPD6B
0.00122679	-4.92484	LINGO1
0.00163562	2.15007	SAMD9L
0.00148676	2.45525	TMEM106A
0.00144142	4.3517	IGK
0.00123951	-3.11838	PIP5K1P1
0.00167612	2.36546	SLC31A2
0.00147315	2.58296	TRIM36
0.00137572	2.82584	FGR
0.00167864	-5.01699	REN
0.00169807	-1.94869	SGK223
0.00170157	-1.85084	LRRC8A
0.0015907	-5.15782	COL1A2
0.00171665	1.80588	VAV1
0.00132573	-3.13006	MTSS1L
0.00156651	-3.02565	LTBP2
0.00159484	-2.82346	PTPN14
0.0017719	-3.29347	SEMA4C
0.00174131	-2.4691	PIP5K1A
0.00158711	3.60019	FCAMR
0.00148552	-3.0585	OBSL1
0.00135161	3.13832	TMEM125
0.00165639	2.72437	IGHA2///IGHA1///IGH
0.00133632	2.9274	GCSAM
0.00177582	4.90968	ANKRD22
0.00170984	3.2219	TRPV4
0.00145644	-3.98636	KLHL23
0.00178557	-2.39571	CDC42EP1
0.00183294	-2.09048	FAM171A1
0.00176851	2.26874	DERL3
0.00189072	3.8531	CD274
0.00187148	-2.26371	YAP1
0.00143569	3.71511	CNR1
0.00169601	3.49847	SIGLEC8
0.00170683	2.86921	STEAP3
0.00192551	1.70831	IL10RA
0.00146321	-3.41368	LOX
0.00160933	5.59059	GATA5
0.00176608	-3.01405	ST5
0.00187701	2.691	OR52K3P
0.00158593	-3.10114	TBX3
0.0019808	1.63026	GLRX
0.00162738	-4.00352	PHOSPHO2-KLHL23
0.0016858	-4.45206	EGFLAM
0.00200256	1.80206	BLVRB
0.00193907	-2.77422	PTGDR2
0.00155927	2.79095	HCG4
0.00199831	2.34095	CD84
0.00191182	2.24644	JSRP1
0.00204083	2.36049	CD47
0.00163009	3.13334	RAB39A
0.00192562	2.16152	WNT7B
0.00164281	4.12398	SLC6A20
0.00194832	2.38899	MBOAT1
0.00207413	-2.48566	LAMC1
0.00203813	-3.42926	PDE5A
0.00208507	1.92272	MT1F
0.00191625	-2.37766	TGFB2
0.00208692	1.86237	RPS6KA1
0.00171868	3.27483	MST1R
0.00207327	-3.75294	KCNG1
0.00200088	2.47676	C6orf141
0.00213668	2.13949	CYP27B1
0.00218739	-2.04151	EIF4EBP1
0.00216563	-3.08946	DKFZP434L187
0.00213575	2.01578	C5AR1
0.002224	4.33702	IGHG4
0.00194982	-2.57848	HOXA3
0.00222429	1.91112	SLC8A1
0.00226665	1.90488	TMEM26
0.00209831	1.57237	FTL
0.00230373	1.68682	GINS3
0.00225754	-2.20151	HOXC9
0.00207498	-4.05962	FZD10
0.00217132	4.07245	IGHV3-48///IGHV3-69-1
0.00233844	2.11052	FYB
0.00232257	1.98691	WTAP
0.00224473	1.60971	NPC2
0.00228012	-2.43249	FAM13A
0.00235715	1.57497	SLC7A7
0.00235841	4.17899	IGLJ3
0.00235154	3.20859	HAVCR2
0.00237013	-3.75088	VWA1
0.00238716	1.60679	ACOT9
0.00216442	4.3928	MACC1
0.00218514	-3.39516	LINC01106
0.00232047	2.5532	SLAMF7
0.00235689	-1.99302	PARD3B
0.00239774	1.82421	CLIP4
0.00241925	-1.7048	PALLD
0.00220004	-6.25734	COL12A1
0.00239469	2.04665	ANKRD18B
0.00225086	-2.93051	COMP
0.002478	-2.41765	NUAK1
0.00249216	2.07557	LRP12
0.00226118	2.30488	TEC
0.00232777	-3.05828	RIPPLY3
0.00221229	3.37023	KCNE1
0.00253647	-1.83923	TFPI
0.00239348	2.51909	MCTP2
0.00234282	2.33823	CHST4
0.00256818	-1.91943	SPANXD
0.00251853	-2.10278	SEPT5
0.00257143	1.92467	EMP3
0.00261442	3.06872	LHX9
0.00264466	4.65379	IGKC
0.00266406	2.21275	ENPP4
0.00265785	1.78764	ASAH1
0.00262558	-2.01794	GLP1R
0.00256973	-2.28927	KLHL42
0.00268085	1.75196	GGA2
0.00246392	2.25673	TRIM58
0.00264607	2.02277	TPMT
0.00268178	-1.86358	ZNF512B
0.00271832	1.69	UBE2L6
0.00269371	-2.38014	CDC42BPA
0.00272971	2.69896	GPR132
0.00241655	2.97508	KMO
0.00235154	-3.64911	TWIST2
0.00257355	2.29037	ANXA1
0.00267268	-2.18718	MPP4
0.00257283	-3.01778	GP1BB
0.00276358	-2.52977	FUT1
0.00277565	1.70868	EPB41L3
0.00243771	3.83763	XKR6
0.0027832	-2.95183	FGF2
0.0028411	5.10881	IGHV3-69-1///IGHV3OR16-7
0.00260871	2.33174	SPRR3
0.00281933	1.81486	BLOC1S2
0.00285222	-3.13364	LAPTM4B
0.00286259	-2.07345	C9orf3
0.00281774	4.1845	PIGR
0.00284894	-2.4466	DLC1
0.00289471	1.5905	ARL6IP5
0.00292169	3.04085	LILRB1
0.00288554	2.52418	SCEL
0.00286455	2.28329	IRF8
0.0028143	2.55727	AMPD1
0.00292467	1.79911	CYB5R4
0.00278313	3.81124	HK3
0.00291693	2.12159	LINC00707
0.00271065	1.54254	TYROBP
0.00290329	3.35091	GCNT1
0.00278491	2.29269	LILRB4
0.00292068	3.47224	ALDH1A2
0.00297367	-2.21122	NINL
0.00293177	2.03793	SPI1
0.00299039	1.98149	TMEM38B
0.00296825	1.62537	EFHD2
0.00299402	-1.6482	BACE1
0.00298403	-1.53757	NCL
0.00296024	-2.52355	YPEL2
0.00300508	1.68446	SUSD1
0.00304757	1.48906	M6PR
0.0029723	-2.37265	B4GAT1
0.00305205	-2.75186	LRP6
0.00276445	3.44462	FAM3D
0.00312387	1.79613	GBAP1
0.00304448	-1.97778	CCDC40
0.0031136	-6.35183	KRT34
0.00315181	-4.18728	CCBE1
0.00311459	1.84086	ADAMTS7
0.00315845	5.42977	EYA4
0.00319653	2.39521	WDFY4
0.00320395	-2.63634	UCK2
0.00320858	-4.34185	MXRA5
0.00320075	1.75891	LAPTM5
0.00325615	1.6779	OR10H2
0.00318669	-6.34247	COL3A1
0.00328098	1.75342	EHD1
0.00324513	-3.57302	HSPA12A
0.00332575	-4.31475	COL5A1
0.00334964	1.83124	DAPK1
0.00316885	2.75256	NRIP3
0.0033718	2.66287	MS4A6E
0.00333434	2.34598	CPA4
0.00338584	-2.19151	ENC1
0.00298614	1.04383	TLR10
0.00339995	-1.89877	CLDN14
0.00342175	1.93725	TRIM14
0.00317509	2.43844	CARD14
0.00334769	-2.69086	PMCH
0.00347541	-1.75486	WASF1
0.00348548	-2.13958	BAG2
0.00343406	2.0169	EBI3
0.00325682	-2.53536	CALD1
0.00349443	1.53279	CD86
0.0033945	3.71549	NTS
0.00354325	1.61657	RAB3IL1
0.0035166	3.94225	CETP
0.00343792	3.01201	LILRB5
0.00345299	1.30017	CCR9
0.00344935	-2.45884	SNCAIP
0.00359514	-1.51939	SIM2
0.00362659	2.21031	MR1
0.00364454	-5.09943	CCDC102B
0.00345209	-2.46614	TRPC1
0.00366486	-2.86721	ITGA2
0.00366655	-2.11229	SPTBN1
0.00359634	4.58364	IGKV2-24
0.00361944	-1.70771	PHLDB2
0.00367063	-5.17695	EDIL3
0.00360176	1.96659	IL12RB1
0.00361417	2.16428	SRGN
0.00368536	-2.91617	FAT3
0.00337601	2.35591	CALN1
0.00352147	1.89017	BLVRA
0.00353409	2.02932	CTSZ
0.00363317	2.03966	BTK
0.00340968	2.83157	STON2
0.00367171	-2.52711	FRZB
0.00341511	-2.54325	RANBP17
0.00353215	-1.28347	LAMB4
0.00347539	3.8914	ACSM5
0.00373153	-3.18137	GSTA4
0.00369635	1.78948	APH1B
0.00369279	1.64511	C3AR1
0.00360654	-5.03469	RBM24
0.00380879	1.8288	HSD17B14
0.00381892	-1.69299	FRMD6
0.0038283	2.0785	TFEC
0.00382667	-3.47046	ARHGAP29
0.00383734	1.77987	GNS
0.00375496	1.60819	SAMSN1
0.00383303	-3.71509	C10orf10
0.00352225	1.42646	MT1E
0.00385675	-2.4792	PALM
0.0038978	-1.78589	KIF9
0.00391417	2.97745	NPFFR2
0.00347004	1.07584	ITGB6
0.00390129	3.22439	OASL
0.0039162	2.16261	CLECL1
0.00384844	1.42089	CMTM6
0.0039495	2.35319	SIGLEC9
0.00382573	-1.35744	MRPS2
0.00388771	2.81583	C1QC
0.00367294	2.33354	TGFA
0.0038555	1.79783	LCP2
0.00402905	3.036	SLC6A12
0.00401931	-1.56545	LPP
0.00405602	2.06903	AIM1
0.00396131	2.66169	HFE
0.00380088	-1.23265	BRINP2
0.00387731	1.37647	TPTE
0.00387545	2.39886	SNX20
0.00355825	-1.11354	RPLP0
0.00399608	1.8535	LOC649294
0.00384944	2.05512	CCL3L3
0.00409339	3.55739	FABP3
0.00408854	3.09726	KLRC2
0.00379288	-2.49385	TNFRSF19
0.00411966	-3.57103	MXRA8
0.00377923	-1.49075	JUNB
0.0041321	1.94604	TLR4
0.0039598	1.35523	CYBA
0.00417339	-2.23946	LAYN
0.00400635	-2.85097	GATA4
0.00410459	-1.43202	TRIM8
0.0041103	1.53732	RAB8B
0.00401286	2.37303	CXCR2
0.00425339	1.50213	STX7
0.00401371	2.26845	CSAG4
0.00427772	-1.78608	PDPN
0.00427035	-1.79851	TYRO3
0.00377268	-1.11452	TMEM178B
0.00427587	2.35472	KLHL6
0.00417459	-1.36633	SRF
0.0040719	-3.12316	TMC7
0.00409924	3.21301	NPTX2
0.00436265	-3.03377	WNK3
0.00423845	2.26664	MYD88
0.00428876	4.67815	IGHA1
0.00431788	-4.3846	PCDHB10
0.0043575	-2.3113	ITGBL1
0.00395266	2.56039	CD163
0.00424431	4.3606	HBD
0.00346827	0.886393	HEMGN
0.00437298	3.36277	LILRA3
0.00415925	1.32109	DAB2
0.00402471	2.20146	C15orf48
0.00423829	-2.8135	PARD6G
0.00443281	2.544	IL21R
0.00420797	2.24855	COQ2
0.00423766	-3.06979	EFNA1
0.00445367	-3.32518	ADAMTS12
0.0044669	-2.27686	WNT3A
0.00437236	1.89221	THEMIS2
0.00444632	-1.9608	CLEC11A
0.00450545	-2.03877	RHPN1-AS1
0.00424825	1.50773	SDCBP
0.00441439	1.59118	PLEKHB2
0.00451385	1.91031	SLC2A6
0.0044814	-5.02061	FBLN1
0.00456678	1.66401	RNF186
0.00428493	1.57483	ATP6V1A
0.00452323	2.54518	BIK
0.00462333	4.33588	TRIM29
0.00452998	3.81584	CEACAM7
0.0046395	-2.64281	NPNT
0.00454828	-1.98869	TEAD1
0.00463906	-1.95237	GPX7
0.0041708	1.33623	FTH1
0.00465867	-2.07216	MBNL2
0.00427855	1.47628	HLA-DRA
0.00449777	3.63055	SPRR1A
0.00472362	-2.9425	CASC15
0.00449913	1.29414	PLAUR
0.00469315	2.19362	PARP8
0.00467684	3.19553	KCNJ16
0.00470181	1.98441	NEFH
0.00471646	1.54595	ARHGAP30
0.0045807	2.32935	PDE4DIP
0.00459581	-2.80718	ZNF704
0.00480381	-1.56823	TCEB2
0.00459383	-1.82409	PLK2
0.00476731	1.45032	CDC42SE2
0.00454449	1.41207	RNF13
0.00484503	2.43211	RASGEF1B
0.0048429	-3.0546	PRTG
0.00485997	2.77335	SFTA2
0.00472541	1.47221	OTUD1
0.00487872	-1.63867	SOCS7
0.00490843	1.80714	LY75
0.00478064	3.1578	ADGRE1
0.00489399	-3.98861	HMGA2
0.0048481	-4.22587	EPHA3
0.00485842	2.32808	GTSF1
0.00487446	1.62101	STX11
0.00495892	3.02892	LILRA2
0.00497685	-2.80157	TFAP4
0.00486267	1.61058	SEL1L3
0.00499185	1.72157	SLC12A7
0.00488672	1.94155	PLEKHA2
0.00485246	-2.11215	TMEM237
0.00482675	-1.55487	RELL1
0.00493821	2.06677	RNF144B
0.00487454	-4.31637	KIF26B
0.00489158	1.42792	SP140
0.00506481	-2.78427	PTGER3
0.00489335	-2.63519	PMCHL1
0.00505983	3.57212	C1QL2
0.00508723	1.9042	SIRPG
0.00512284	-2.17712	GNAI1
0.00512105	1.91135	GALNT6
0.00514493	2.33098	DNAJC5B
0.00497288	3.16689	CDS1
0.00500623	1.46017	FERMT3
0.00517655	2.17121	LOC100507557
0.00515678	2.48703	P2RX4
0.00500242	-2.80112	PLOD2
0.00513899	-2.57287	ITGA1
0.00519686	-2.63439	FZD7
0.00524621	-2.5044	ACVR2B
0.004743	2.09577	MPP1
0.00507368	2.74013	VSTM2L
0.00489856	1.29388	LYN
0.00525651	4.62646	IGHM
0.00511808	3.0516	UCP2
0.00526685	1.47951	KCTD4
0.0052938	-2.19305	EVC
0.00510482	1.49342	CALM3
0.00522988	3.94237	PDCD1LG2
0.0053228	2.7701	ASXL3
0.00521531	3.8277	CLDN10
0.00535687	-1.7026	SLC20A2
0.00537562	-2.04449	AGFG2
0.00537508	-2.66357	GPC6
0.00520466	-1.60139	ZNF503
0.00515952	2.97482	TLR1
0.00534788	-2.83756	EXT1
0.00536279	-2.4121	CASC7///AGO2
0.00520046	-2.46528	GDF7
0.00540292	-2.05533	ZDBF2
0.00534381	1.85721	SLC30A2
0.00441541	0.937784	DMRTC1
0.00534394	-1.61281	ZNF275
0.00540135	-2.20244	C19orf18
0.00531204	1.49108	IFIT1
0.0055036	-1.92798	LYSMD1
0.00540259	3.91536	NAALAD2
0.00535613	-2.49868	IRX5
0.00525396	2.25052	CXCL12
0.00545419	2.19559	TPRG1-AS1
0.00374181	0.711679	NME9
0.00537619	1.54698	GBA
0.00526526	3.42441	TNF
0.00509101	1.14077	CYTH1
0.00559106	2.84439	CD72
0.00557082	4.01584	KREMEN1
0.00538554	1.52749	EPB41L1
0.00567041	4.75689	IGKV1-5
0.00566384	2.62235	LMNTD1
0.00571202	2.33861	LILRA1
0.00554581	2.08759	CXCR2P1
0.00572353	2.06355	SPATA8
0.00573252	-3.04829	NID1
0.00566443	2.39354	FBXO6
0.00571612	3.69663	MZB1
0.00574211	1.94862	ACP2
0.00567474	-3.31749	UHRF1
0.00572821	-1.67293	FAM163A
0.00574867	2.21843	CYP11B2
0.0057692	-2.93241	CCDC80
0.0056474	2.94866	FAM167A
0.00554928	-1.77004	MAGEF1
0.00580764	1.7844	SIRPB1
0.00531728	1.98439	MS4A4A
0.00580048	1.88613	EPSTI1
0.00581543	3.45876	TMEM171
0.00530313	1.6562	S100A11
0.00570393	-1.47752	LOC100506990
0.00556008	1.41503	SLC43A2
0.00583952	-2.04975	FAM110B
0.00567468	-2.11522	ZNF471
0.00566766	2.42925	MT1JP
0.00544106	-1.58863	SHMT2
0.0058782	1.83618	OGDH
0.00582731	3.13661	UGT2B17
0.00579586	2.12354	PNOC
0.00591408	3.15242	CD180
0.00591035	-1.77046	NT5E
0.00532407	3.30918	FCGR3A
0.00592681	2.42869	C6orf99
0.0058122	-1.9239	VANGL1
0.00582908	1.81529	CD276
0.00597405	-2.58437	UNC5B-AS1
0.00602446	2.75273	KRT80
0.00610405	2.61074	SCN1B
0.00474346	0.93298	PMP2
0.00594091	-1.97836	SH3BP5L
0.00595783	-2.08354	FBLIM1
0.00602911	3.09496	ADAMTS2
0.00611351	3.01208	TPRG1
0.0061521	2.58252	PNPLA1
0.00605623	2.81474	TLR6
0.00606193	1.95143	B3GNT8
0.00529863	1.64002	HLA-DPA1
0.0062064	-3.15382	CDKN3
0.00621447	-3.08086	INSR
0.00622181	2.72911	PTGER4
0.0060506	1.7504	DUSP3
0.00626815	2.91366	FGF13
0.00617798	-1.5909	SAMD4A
0.00627787	1.65096	SMKR1
0.00630512	2.41074	PPARGC1A
0.00616369	-1.96804	NECTIN3
0.00600304	-1.94495	ZSCAN18
0.00634656	2.93991	TCN2
0.00634609	3.27051	TMEM27
0.00580028	2.19201	MX1
0.00613457	-1.62501	TJP1
0.00605976	1.27713	CARD17
0.00593667	2.00684	SLC37A2
0.0064084	-2.56677	RBPMS2
0.00635992	2.13681	IRF5
0.00610737	1.54864	MFSD13A
0.00579561	1.7976	HLA-DOA
0.00644819	2.03697	PXN
0.00645627	-2.52697	RPL23AP32
0.00582785	3.90235	CFP
0.00646999	-2.68193	ADGRL2
0.00638718	-1.98979	STAB1
0.00641523	-3.37124	SGIP1
0.00645546	4.01494	IGLL5///CYAT1///IGLV3-21
0.00647913	2.4207	TFF1
0.00652221	1.82915	PTPRJ
0.00651866	2.15967	CEACAM3
0.00653427	1.79061	MGC16025
0.0059331	2.11942	IDO1
0.00655953	-2.20247	FAM216A
0.00656832	1.86889	C9orf72
0.00658491	1.85702	LOC645984
0.00659111	2.65407	LOC101927827
0.0062483	1.38846	MFSD11
0.0065633	-2.2545	NR5A2
0.00603724	1.20926	GLUL
0.00662203	2.64672	SDC3
0.00620314	1.23937	CARD16
0.0066384	-4.85994	ASPN
0.00556159	1.26208	JUN
0.00661784	-5.05176	FHOD3
0.00600362	2.34371	CST3
0.00652083	4.85526	LINC01093
0.00655214	1.80042	PPFIBP2
0.00669659	-2.56706	TMEM133
0.00662529	2.51577	PRR5-ARHGAP8
0.00613894	2.38197	LILRB2
0.00595135	1.48535	CASP4
0.00677743	-1.70841	DCBLD2
0.00668699	1.90756	TTC22
0.00639921	1.48824	PPARG
0.00628625	1.33584	CD164
0.00647024	-5.32565	TRPC6
0.00669817	-1.6948	OSR2
0.00682512	2.79036	AP1S2
0.00644307	1.22511	DESI1
0.00622828	1.23797	C1orf122
0.00629429	1.29985	PTPRE
0.00682932	1.65421	LOC101929622
0.00652105	1.49296	MOB1A
0.0063424	1.2776	IFIH1
0.00662699	-1.87093	NTN4
0.00675793	5.03234	TNIP3
0.0068975	-3.51707	CDON
0.00685213	2.21308	HESX1
0.00695336	2.11663	DOCK2
0.00672388	-2.65932	APBB2
0.00687955	2.02515	UCMA
0.00638283	1.20099	MTF1
0.00649357	-2.20689	NAV2
0.00643506	1.17094	VOPP1
0.00694924	2.59495	PSTPIP2
0.00693528	-2.53593	ADGRB3
0.00678878	1.81827	FUT4
0.00692481	3.22248	NLRP7
0.00644438	-1.14866	CHD7
0.005641	1.08788	SOD2
0.00664529	2.2422	IFI6
0.00704148	1.97748	NUDT16P1
0.00708921	-2.61167	RAPGEF4
0.00716875	-1.86488	AXIN2
0.00701476	1.62288	GPD2
0.00643385	-1.42306	NUPR1
0.00674481	1.63432	SMPDL3A
0.00718623	2.40783	CSAG1
0.00726407	1.87589	STXBP2
0.00667825	2.58448	PLEK
0.00684239	-1.29902	NUDT4
0.00721243	1.56801	CSTL1
0.0072954	-1.97891	GARNL3
0.00729671	1.77063	FAM225A
0.00730051	-3.73091	PCDHB5
0.00724939	2.78497	NAPSB
0.00732694	3.19374	SCIMP
0.00714439	1.56845	FMNL1
0.00697657	1.41341	CCL23
0.00592227	1.07468	GRN
0.00709842	1.35864	DNASE1L1
0.007367	2.30806	ACER3
0.00744963	1.97269	SLC6A6
0.00746703	-2.47832	NEDD4
0.00748897	1.69507	ATP2B2-IT2
0.00736195	2.74033	TMTC1
0.00718953	1.53381	NUCB1
0.00714593	-1.89892	SERPINH1
0.00718111	1.40664	ABI1
0.00748715	1.60673	MYO7A
0.00757197	-2.21362	MYH10
0.00725781	1.40264	PI4K2B
0.0070008	-1.68531	ALKBH2
0.00738192	-1.37001	ABI2
0.00758473	1.70363	SP140L
0.0063906	-0.986608	RPL29
0.00720394	1.31009	SLC11A2
0.0074741	1.52335	KLF6
0.00759693	-2.80751	PPP1R14C
0.00691025	-3.68087	RNASE1
0.00717459	1.24936	TMEM140
0.00764849	1.86064	SEMA4D
0.00722643	1.44235	EZR
0.00664241	-1.21515	TIMM13
0.00734936	1.46641	NBN
0.00711935	1.97833	ACSL5
0.0075877	1.45125	EXPH5
0.00738479	4.01618	AIM2
0.00763907	1.68052	TAGAP
0.00767535	1.56911	SLC12A6
0.00757055	1.53093	DSCR3
0.00688862	1.68862	CCR7
0.00748204	-1.74494	SHC2
0.00721395	1.55623	NMI
0.00643237	1.45614	HLA-DRB1
0.00773814	2.28457	AOAH
0.00760573	-1.50231	CFL2
0.00783875	-1.77909	BCR
0.00768779	2.47475	GRAMD2
0.00776751	1.9329	GFI1
0.00710868	2.48071	CST5
0.00779919	-4.23249	RGS5
0.00634374	1.05117	MT1A
0.00775811	-2.06197	FAM78B
0.00794304	-3.73234	PCDHB9
0.0072965	-1.84191	GPSM1
0.00793459	-2.64822	SYDE1
0.00762298	-1.67111	MTHFD1L
0.00785428	1.80117	DTNB
0.00774489	-4.3919	FOXF2
0.00734546	-1.14438	PURB
0.00774219	1.82252	GNPDA1
0.00775234	-3.47361	SH3RF3
0.00764533	-2.15017	NR2F1
0.00759109	1.24259	PLGRKT
0.00807213	-2.21847	KIF4A
0.00744896	1.56819	SP110
0.00764103	-1.64573	FAM210B
0.00740104	1.28738	CNDP2
0.00749493	1.2113	FAM120AOS
0.00816934	6.33082	CEACAM6
0.00813569	2.62143	SULT2B1
0.0081709	3.54073	PPL
0.00817881	-3.65416	CAP2
0.00779807	2.49365	DHDH
0.00820908	-2.48122	ZNF667
0.0082368	-2.2907	WSCD1
0.00818779	-1.98811	ARMC4
0.00829205	-2.35949	TMEM74B
0.00798225	3.33854	GALNT5
0.00768078	1.79923	CYBB
0.00811656	1.44069	PPT1
0.00761195	3.24973	SIGLEC5
0.00838118	-1.8997	NHSL1
0.00833487	-3.60114	HIGD1B
0.0078143	1.64851	LAMTOR3
0.00795466	4.76302	IL36RN
0.00807579	1.33173	GPR119
0.00834252	-2.24655	OLFML3
0.00842577	2.33814	LOC100505622
0.00795681	-1.21447	DHX37
0.00829894	-1.73475	SH3TC1
0.00847293	1.89156	LOC100240735
0.00829244	-3.36259	PCDHB12
0.00844764	5.98868	ANXA3
0.00845255	2.66207	NEMP1
0.00851303	-2.02904	RMND5A
0.00816133	4.35293	TCN1
0.00756779	1.41499	HK2
0.00850208	-1.98746	PCDHB8
0.00832208	2.31789	PRSS16
0.00853947	-2.97918	PCDHGA3
0.00858591	1.77534	OR6K2
0.00858936	-2.2529	KCNIP3
0.00833257	-2.22859	GFPT2
0.00816019	-1.57125	UTP20
0.00859674	3.55852	AGR2
0.00839642	-2.09903	IL13
0.00859153	-2.77566	LOC105372321
0.00843628	-2.2062	GPC4
0.00775337	1.59962	TNFAIP8
0.00783685	-1.13376	FAM213A
0.00779303	1.17002	UGP2
0.0077991	1.16231	FKBP15
0.00795165	-2.03336	EPN2
0.00804532	-2.02187	BOP1
0.0085495	1.61449	MAP7
0.00806538	2.13625	PIK3AP1
0.0084582	1.45625	FAM13B
0.00780241	-1.38715	CMSS1
0.00858923	-2.89935	AGAP1
0.00826878	-1.31621	UBE2K
0.00837997	1.41823	PAK1
0.00848738	1.85847	PKN2-AS1
0.00861951	-3.63789	PRKG1
0.00791411	1.77888	GPCPD1
0.00790746	-1.16946	SPTSSA
0.00800515	2.03965	CD33
0.00873881	2.30944	DLEU1
0.00878603	3.34554	SUCNR1
0.00802594	3.78647	HCAR3
0.0075645	1.78325	MAFB
0.00726542	-1.06016	KCNC2
0.00864938	-1.52029	DLL3
0.0087992	-3.31273	CC2D2A
0.00882442	3.15958	GPR85
0.00830005	5.60549	CD5L
0.00805429	1.69702	HCK
0.00886411	2.34096	ACTN2
0.00822189	-1.36733	KDM5B
0.00871926	2.59196	TTYH2
0.00891902	1.7958	PTGES2-AS1
0.00834329	-3.55872	TNFRSF11B
0.00867542	-5.2923	PDGFRB
0.00885492	-2.78626	CNIH3
0.00795245	1.4267	CD82
0.00817519	-1.5815	TCF3
0.00889914	1.94222	ADPRH
0.00900237	-2.53503	GALNT16
0.0088592	1.62811	RENBP
0.00800947	-1.62927	S100A16
0.00892589	-2.0617	GPSM2
0.00906483	-4.9274	COL14A1
0.00802786	1.45329	OSTF1
0.00875992	2.98579	BMS1P20
0.00911707	-2.56271	EPHB4
0.00908097	2.39587	PARP15
0.00831051	1.98499	PCBP1-AS1
0.0090559	1.57682	PTK2B
0.00894263	-1.82948	FKBP14
0.00879734	-1.8086	GTF3C4
0.00914855	2.03113	ZFYVE16
0.00845055	-1.44183	SMIM23
0.00831963	1.17929	NAGPA
0.00921777	3.02	SIRPD
0.00808592	1.36654	SDSL
0.00816646	1.09031	ATP6V1B2
0.00888136	4.57042	ITGAD
0.00827297	1.52309	FCGR2A
0.00876249	-1.36112	ANKRD28
0.00817914	1.48228	HLA-DMB
0.00888111	-1.81258	DMPK
0.00891335	1.42833	RAP2C
0.00933717	2.56936	PNMAL1
0.00864744	1.51478	ITGAM
0.00928296	-3.23725	ADCY6
0.00785773	-1.6354	TNFRSF12A
0.00943024	-2.18159	TMEM198
0.00922331	1.7174	PLEKHM1
0.00897014	-1.82064	BOK
0.0085649	1.58001	FMNL2
0.00943352	-2.83897	COL16A1
0.00935251	2.65301	MPPED2
0.00912745	1.2858	NHLRC3
0.00910821	1.37623	CTBS
0.0089605	1.29424	PIK3CD
0.00958648	2.78174	IRF6
0.0081887	3.33937	VSIG4
0.0095317	2.0292	PYHIN1
0.00888874	1.26651	CHRNA4
0.00933308	1.46514	HMMR-AS1
0.00941719	-2.61537	TEAD3
0.0096379	3.18911	SLC5A1
0.00962105	-2.20426	MAP2
0.00895004	1.34856	CD209
0.00970769	3.14113	KRT33A
0.00955958	-4.64561	NEURL1B
0.00882883	1.34296	HPS5
0.00932244	-1.66059	TAF5L
0.00917487	-1.57627	CLIP2
0.00862318	1.09822	RP2
0.00944314	1.8334	PIWIL4
0.00909145	3.07204	IL18
0.00966904	2.33253	MBP
0.00890211	1.45231	DHX58
0.00851369	1.09563	TMED5
0.00951258	3.73297	GCNT3
0.00912233	1.70126	VCAM1
0.00829097	-1.10411	SDK2
0.00977579	-1.70202	NPTX1
0.00886286	1.54484	GPR65
0.00629294	0.681391	NTNG1
0.00968461	-1.69085	GATSL2
0.00958048	-1.97963	PHLDA3
0.00975764	2.13271	HSD3B7
0.00979703	2.59756	MUC1
0.00944312	4.3279	VTCN1
0.00897785	1.79522	SRC
0.00911107	-2.29403	MYO1B
0.00897703	1.43578	CYLD
0.00890754	-1.12492	PRRC2B
0.00976351	-2.2205	CTDSPL
0.00953007	-3.58608	NES
0.00922024	1.17504	CCNYL1
0.00856461	2.17808	MT1M
0.00855265	1.50525	PSAP
0.00849007	-1.21391	HK1
0.00958176	1.35616	MMAA
0.00788886	-1.0689	RPS7
0.00965547	1.64256	OR3A1
0.00904208	-1.54809	KHDRBS3
0.00934105	-4.1614	SEMA5A
0.0100209	1.54738	KBTBD8
0.0094126	1.47592	ELAVL4
0.00970793	1.48909	WTAPP1
0.00973918	-3.68278	FAM69B
0.00988993	-3.08805	BMP8A
0.00956593	-3.36252	ANKRD66
0.00983765	1.32787	AHCYL2
0.00899146	1.21554	ATP6V0CP3
0.00918372	-1.41537	POLRMT
0.0101792	-2.08763	TMEM120B
0.00926676	1.19108	ARL4A
0.00916328	-1.87817	KAT2A
0.0101946	2.23299	KCNJ10
0.00965034	2.08984	JAK2
0.00909694	2.74545	CXCL10
0.00905267	2.33437	ADGRE2
0.00996199	-2.13048	LOC100507103
0.0100274	2.5189	HPSE
0.00907512	-1.22058	BYSL
0.00822559	2.14171	NINJ1
0.00915786	-2.03561	RGS3
0.0101667	2.87336	FCRL2
0.00959862	1.71963	STARD8
0.007767	-0.94988	RPL7A
0.00857016	5.93662	MARCO
0.00953742	-2.04603	PPT2
0.00937203	1.17331	MAPKAPK3
0.0102508	1.93807	CBL
0.0104707	1.88892	RPL10
0.00934448	-2.24986	PAWR
0.0101727	1.34778	AKAP7
0.00818709	1.14589	PSMA6
0.010471	3.45766	SMPD3
0.0101973	2.15947	STAT2
0.0105413	-1.98127	FBXL18
0.0105147	1.673	UNKL
0.00952248	1.23886	SLC43A3
0.010088	-4.17898	LOXL2
0.0101186	2.46039	OAS2
0.00825757	1.87677	CCL3
0.00892959	1.05181	PSMB10
0.0101474	-2.06325	GLIS3
0.00943203	-3.66149	CTGF
0.00966207	-2.1493	GRPEL2
0.00935246	1.82063	LY96
0.00936027	1.56114	FAM49B
0.00953331	3.44275	NKG7
0.00992872	2.30189	APOBEC3G
0.0105915	1.50951	C7orf50
0.0104249	1.55797	SIRPA
0.0105664	-1.36815	QSOX2
0.00906799	-1.08775	RPS5
0.00980767	1.43418	MKNK1
0.0105782	-1.98516	SERP2
0.010919	2.51189	TIMP4
0.0109279	-2.58599	LGI4
0.0108624	-2.94028	PDGFRL
0.0105694	1.9836	ACADL
0.00982891	1.28672	THAP8
0.0105599	2.20706	GNG2
0.0108514	2.55892	PPP4R4
0.009704	1.1926	ADPGK
0.0107792	1.38255	ANKMY2
0.00952379	2.02591	SIDT2
0.0104976	3.75327	XCL1
0.0104724	1.89765	ME1
0.0101919	4.01468	PLAC8
0.0104608	1.85065	MYO1G
0.0111436	-2.55909	PDE4D
0.00977519	-1.41125	LIMA1
0.00970544	1.15032	MYOF
0.0110866	-2.45484	PKDCC
0.0105249	1.67569	IRAK3
0.0112151	2.64003	CLIC6
0.0103672	-1.52091	ZNF544
0.0112579	1.93284	ROR1
0.0107857	-4.60384	ACAN
0.0112807	-2.86478	LINC00622
0.0110509	-3.32798	TMEM45A
0.0113921	-2.32606	PARD3
0.00898235	-0.98342	RPS3
0.011164	1.51564	RUFY3
0.011272	-2.11938	FRAS1
0.0100909	-1.72969	C10orf2
0.0108329	1.38007	BIN2
0.00993919	1.4259	TDRD7
0.0111507	1.3499	PGLYRP1
0.010116	1.82108	CD48
0.0113558	-2.54207	RBFOX2
0.0105022	1.43653	BBS2
0.0104592	-1.39768	ZNF692
0.0104847	-4.18669	CCR8
0.0100245	-2.81755	SULF2
0.0114848	4.0778	LPAR5
0.0112208	-1.54875	ATP7B
0.00989948	1.40436	CASP5
0.0107035	1.63524	HNMT
0.0109221	2.81487	ELOVL7
0.0116204	1.89534	LINC00847
0.0111233	3.90336	XCL2
0.00899546	2.53037	C1QB
0.0100928	1.32636	ARRB2
0.010054	-1.01534	C5orf24
0.0109064	1.5724	KAT2B
0.0105883	-1.17258	RPRD1A
0.0116831	1.72126	GPRIN2
0.0102202	2.32723	ME2
0.0101903	1.60076	NPL
0.0105403	-1.86491	NCKAP1
0.0098101	-1.15007	FBL
0.00968109	1.67938	ISG15
0.0107122	-1.30854	MED13L
0.00900112	1.13123	MT1H
0.0119423	-2.87696	DLG5
0.011409	1.33369	CCDC93
0.0114703	-1.62572	LOC100133920
0.0113799	-1.36832	KCTD11
0.0112831	2.60409	LINC00955
0.0119763	-2.09814	FSIP1
0.0106693	1.1262	FICD
0.0117631	1.72106	TMEM174
0.0119518	-1.61159	EXTL2
0.0118919	3.60981	CYP2C18
0.0117697	-2.41835	FBXO17
0.0104518	-1.85953	MAGED1
0.011885	-4.84916	COLEC11
0.0113918	-2.21481	TMEM74
0.0113483	3.34354	TNFRSF17
0.0105938	1.47896	HEXA
0.0120714	-4.89819	OLFML2A
0.00837026	-0.862838	LRRC74B
0.0120234	-1.73207	PLXNB1
0.0121493	-2.36993	DIXDC1
0.0117633	-2.29321	TMEM246
0.0102217	-1.31022	GTF2I
0.0118232	1.85172	PDK3
0.0107875	1.33532	ATP6AP1
0.00892026	0.862955	NFKBIA
0.0122157	-2.88796	MMP11
0.0119377	-1.92049	IRS1
0.0101952	1.02521	RAB10
0.0115574	2.67224	PROM1
0.0108038	-2.64993	PYCR1
0.0118238	1.62959	GREM2
0.0115492	-1.41433	WDR34
0.0106047	-2.05116	LAMB2
0.0123862	1.68531	SPATA9
0.0120051	-2.77928	PCDHB11
0.0104775	1.78391	DDAH2
0.0124273	-1.64347	ZNF610
0.0117736	2.47312	NXF3
0.0114211	1.96493	IFIT3
0.0124321	4.81834	LOC100128993
0.0099115	2.37043	LIPA
0.0113307	-1.57559	PUS1
0.0109167	-1.94596	VCL
0.0115104	-2.7089	C8orf4
0.0107426	-1.21554	MSH6
0.0125498	-2.64886	CCL26
0.0125867	1.65718	HORMAD1
0.0124357	1.83613	MOB3B
0.00930853	1.04526	MT1X
0.012637	-1.84551	C5orf34
0.0125301	-1.70202	PRR7
0.0107622	3.24666	BCL2A1
0.0115215	-1.89227	HOMER1
0.00722231	-0.717623	COL6A3
0.0108493	1.56417	LGMN
0.0108048	1.32232	TPP1
0.0122546	-4.15605	SMOC2
0.0122118	-1.4539	CTIF
0.0110223	1.97618	LST1
0.0122696	-1.73886	HYAL3
0.0112224	-2.48828	MDK
0.011141	1.04601	FAM21C
0.0114131	-1.37617	MYL6B
0.0120518	1.60271	PIK3R5
0.0118685	1.23757	SFTPC
0.0115411	-1.94107	FNBP1L
0.0100229	0.891808	TPM3
0.0126299	-1.55007	DOK4
0.0119446	2.41036	ASCL2
0.0115256	-1.39085	USP35
0.012651	1.49748	FLVCR2
0.0119115	1.3562	UNC93B1
0.0113814	-1.24079	LOC641746
0.00850944	-0.726209	LINC00899
0.0124502	2.3485	IPCEF1
0.0123287	2.56094	LRRN1
0.0130664	-2.88745	PLCE1
0.0126807	-1.95582	SOX13
0.0129618	4.51233	SPIC
0.0131129	-1.54594	IL12A
0.0115439	1.84197	IFI35
0.0124431	1.52094	PCDHGA7
0.00682249	-0.578231	CCDC121
0.0123535	-2.22513	CHRDL2
0.0123148	1.67967	MNX1
0.0124021	-2.37032	HELLS
0.011917	-3.78082	ADGRL3
0.012486	-1.50703	TRIM2
0.0127758	4.107	RIMKLA
0.00865853	-0.933978	MED12L
0.0110923	1.18983	ATP6V0C
0.0126915	-2.92866	POM121L8P
0.0116548	1.4977	OXSR1
0.0128958	2.02195	TRIM38
0.0111376	-0.970619	TPM4
0.0117947	-1.26881	ADNP
0.0122829	-1.38266	ZNF256
0.0116736	-1.20442	RPUSD2
0.0132445	-3.08969	STC2
0.0115264	-1.12028	SHC1
0.0132442	3.81054	P2RY1
0.0115129	2.35178	CYTH4
0.0133163	3.88641	BSPRY
0.0110462	3.40291	GBP5
0.0114466	1.82684	ZNF438
0.0128444	-4.2623	FN1
0.012378	-2.93928	FADS1
0.0131808	1.50119	ITGB2
0.0116002	-1.00803	GPR183
0.0102962	1.82739	CSTB
0.013503	-2.68805	PTHLH
0.0124644	-4.22391	TBX2
0.013408	-1.65467	DDIAS
0.0127648	1.24817	TMCO4
0.0130464	2.00929	FBXO2
0.0122415	-4.17445	PRRX1
0.01276	-3.00544	ANTXR1
0.0127932	-2.84625	NEXN-AS1
0.0130185	1.62789	TRIM21
0.0119988	1.08689	DDX58
0.0138259	-2.50504	AUTS2
0.0135526	2.16979	DPEP2
0.0132764	2.1034	AMDHD2
0.0119811	-1.33792	BAX
0.012111	1.07533	GBP3
0.0136622	-2.93309	COLEC12
0.0120855	1.29289	LACTB
0.0130952	2.68938	UMODL1-AS1
0.0115189	1.0742	GNPTG
0.0121163	-2.0402	DUSP14
0.0105824	1.64681	CSF1R
0.0122523	-1.24035	RAB15
0.0138351	1.56311	FAM46C
0.0117463	-1.45196	PAICS
0.012318	1.07843	SLC35F6
0.0138448	-2.13579	SRRM3
0.0123523	-4.4375	CDH11
0.0140836	1.69317	RASGRP4
0.013625	-3.16875	LAMC3
0.0131156	-1.75861	ZBTB8A
0.0135058	1.29137	TMEM63A
0.0119279	1.76396	CD74
0.0120923	-1.06205	TOMM40
0.0121501	1.36039	MX2
0.0123203	1.04239	PAOX
0.0115685	1.2674	RRAGC
0.0116792	1.16609	STX4
0.012267	1.59041	NEDD4L
0.0120932	1.17907	LAMP2
0.0129917	1.63819	AGR3
0.00708971	-0.528067	CPZ
0.0140123	2.15821	PRKAR2B
0.0136189	1.66675	OSGIN1
0.0121539	1.39114	C5orf56
0.0144204	1.59638	BARHL1
0.0127155	2.35662	IFI44L
0.0136539	1.4407	GAB3
0.0133044	1.39676	N4BP2L1
0.0127198	2.38152	RAB42
0.0120087	4.70879	HBB
0.0120891	-1.45848	ANTXR2
0.0144718	-2.82508	DIEXF
0.0136463	1.92467	NAAA
0.0124107	-2.14798	DBN1
0.0124427	-1.29039	WDR74
0.013975	1.8322	TRAT1
0.0128248	1.70481	ARAP2
0.012213	-1.22694	NR2C2AP
0.0136748	1.42432	TLE4
0.0130997	3.62086	LINC01554
0.014357	2.17159	CD244
0.0135612	-4.12237	FSTL3
0.0132394	3.38549	LINC01013
0.0139531	1.55881	GVINP1
0.0123296	-1.10872	IFRD2
0.0127267	-2.50774	CNN3
0.0145527	4.72294	SRD5A2
0.0144653	2.16828	NAPSA
0.0120351	2.93255	FAM26F
0.0117003	2.3568	CD83
0.0134853	-3.04819	C11orf86
0.0138285	-2.41678	MID1
0.0133729	2.68718	SNN
0.0118793	1.59292	HLA-DRB3
0.0148669	1.64072	NTRK2
0.0129684	-3.87152	LAMB1
0.0139157	2.40789	OR4N4
0.0117354	1.35543	MT1G
0.0120751	1.54186	TDP2
0.0145773	1.97156	SLC7A14
0.0149622	-2.05535	ZNF135
0.0149953	-3.63525	PTPRG
0.0120266	1.57248	PLIN2
0.0128322	-1.41237	FOXP1
0.0140976	-1.70889	ANK3
0.0142643	2.44204	ITGAX
0.0147655	-1.34381	ISY1
0.00974888	0.813279	IL20RA
0.0131583	3.15701	FCGR3B
0.0135493	-1.12069	TSC22D1
0.0143103	1.85905	IGF2BP3
0.0151086	-2.04868	ZNF229
0.0120305	1.99309	C1orf54
0.013739	1.85438	TNFRSF1B
0.0140997	-2.23968	SLC39A7
0.0137051	1.44332	B3GALT5-AS1
0.0115563	1.42191	HLA-DRB5
0.0141715	1.30974	PLEKHM2
0.0131569	2.88805	MIR155HG
0.0156056	1.60794	C9orf135-AS1
0.013804	1.30595	CHCHD7
0.0126001	-0.980664	TARS
0.0147159	2.9645	SIGLEC11
0.0148227	4.38792	PGA3
0.0122519	1.1142	TYMP
0.0128861	1.50187	CXCL9
0.0155687	-1.807	BFSP1
0.0156133	-1.58852	ZNF697
0.0154865	-1.59983	PKI55
0.0157733	-2.81482	VSIG1
0.0139417	-1.16357	URB2
0.0142011	-1.13765	GATC
0.0129717	1.01341	SPPL2A
0.0135923	-1.09291	MON1A
0.00890862	0.715854	KCNK10
0.0147353	2.57714	GATA1
0.012837	-1.22502	ANKRD11
0.0145142	-3.24171	CASQ2
0.0143399	1.09716	CORO7
0.0137318	-1.196	AAGAB
0.0135327	-1.02956	GMPS
0.0162214	1.56054	OR1D2
0.0156599	1.41043	GABRG2
0.0161034	-2.8765	FLNC
0.0144988	1.22581	MDFIC
0.0155651	-1.49503	GPR135
0.0142873	1.25911	PTPN6
0.0142416	-2.07123	PLEKHA4
0.0122054	1.70844	TNFAIP2
0.0149205	1.76985	NCF4
0.0140256	1.01	COMMD9
0.0150186	1.44255	C12orf49
0.0152982	3.27985	MUM1L1
0.015539	2.6219	KLRC1
0.0147466	-1.50042	MCAT
0.0158935	-2.80506	CFAP69
0.0162389	-2.94273	DCLK1
0.0164831	1.96909	CPNE9
0.0164151	-1.87617	GLI1
0.015711	1.55424	PSD3
0.0158302	-2.08004	CHST3
0.0161321	1.47914	DOCK8
0.0159284	-2.59413	ZNRF3
0.0165696	-1.6034	KIAA1671
0.0151967	-2.40115	KLHDC8A
0.0143815	-3.05068	THBS1
0.0121949	-0.986174	EEF1G
0.0157123	2.08243	LOC100130654
0.0161826	1.37923	UBXN11
0.0163988	-4.3037	SEMA5B
0.0135305	1.28852	ELF4
0.0152278	-2.55451	PC
0.0120849	-0.942579	RPL23
0.0117297	-1.18451	MIF
0.0157273	-2.29543	STK19
0.0129772	-1.13635	MYADML2
0.0162184	-1.48667	PSMG1
0.0148615	1.13639	NAT1
0.0150401	-2.37528	TANC1
0.0169394	-1.54348	ZNF566
0.0136287	1.33211	ATP6V0D1
0.0161168	2.18946	IKZF3
0.0142943	1.71248	ARL6IP1
0.0144473	2.5537	LRRC25
0.0160599	-2.85214	PLXDC1
0.0147364	1.11199	YKT6
0.0141479	1.31192	RAB5C
0.0124163	-0.817302	RPL18A
0.016887	-2.13163	SUSD2
0.0171226	1.60404	DRD3
0.0162943	-1.76446	PCDHGA2
0.0158864	-4.62896	FGF1
0.0128342	-1.53882	RPL22L1
0.0172302	1.47979	HCG9
0.0162399	-1.19934	CLUH
0.0172297	-2.06	WDR78
0.0152772	-1.06074	DCAKD
0.0145385	1.95586	TBC1D2
0.0141549	1.29192	CTSA
0.0130166	2.12493	CCL18
0.0143222	-1.22102	ZDHHC14
0.0173429	-2.34714	ZFYVE9
0.0170164	1.83259	BICDL2
0.0170287	1.90707	MTHFR
0.0167219	2.24427	EIF4E3
0.0172054	-2.4039	MAPT
0.014512	2.53685	ALOX5
0.0143088	-1.27947	PTDSS2
0.0151931	-1.31365	SNX7
0.0170051	1.4291	SLC38A7
0.0175014	-1.91242	CNNM2
0.0163159	-1.15348	ACOT7
0.0143134	1.29163	NSMAF
0.0157357	1.81924	CD226
0.0157116	-1.75827	FADS2
0.0176799	1.69601	FBXL22
0.0171156	1.35722	CLCN5
0.0169943	2.0249	MOB3C
0.0171803	-2.92385	KRT222
0.0134847	-3.0999	COL18A1
0.0157857	1.22239	CALML3
0.0169006	1.26816	FLCN
0.0177193	-2.05046	TMIE
0.0171961	-2.94344	TRABD2B
0.0139377	0.991635	TMEM70
0.0152318	1.04166	CXorf38
0.0170939	1.44605	FAM225B
0.0166358	1.48514	DMXL2
0.0159052	1.59692	TNMD
0.0148355	-1.29149	GCSH
0.0179361	1.42681	STARD5
0.0167944	-2.0719	EPO
0.0179597	2.16823	NLRP2
0.01541	1.22534	C12orf4
0.0170858	1.2837	RAB8A
0.0180612	-1.45343	CHORDC1
0.0168563	1.74883	PSD4
0.0157214	1.0282	SH3BP2
0.00794087	-0.454939	INSL5
0.0174594	4.2029	P2RX7
0.0176221	-1.6668	ZNF93
0.0156539	-4.2519	CBLN1
0.0174057	2.05279	CNTLN
0.016088	-3.36378	RXFP1
0.0151176	1.01536	BID
0.0172306	1.88139	ZNF185
0.010499	0.74564	ALDH1A3
0.0131252	-0.93092	RPS6P6
0.016931	-1.71701	YES1
0.0124865	-1.1097	RPS18
0.0174041	-1.9878	VSIG10
0.0170117	2.4697	C2
0.0159325	1.75501	ADCY7
0.0174924	2.73362	GCH1
0.0148781	2.28763	OGFRL1
0.0179331	1.54977	USB1
0.0151408	0.998276	MAPRE1
0.0154386	-0.956255	SET
0.0169655	1.61977	IL10RB-AS1
0.0157023	-1.25001	PDIA5
0.0130172	1.02532	MT1B
0.01524	-1.47142	CAMK2N1
0.0182573	-2.72821	KALRN
0.0184774	-1.91139	CBX8
0.0160003	1.40577	MB21D2
0.0132929	-0.786681	RPL18
0.0151747	-1.04336	GPATCH4
0.0167836	-3.12525	SLC2A4
0.00884474	0.492476	LOC102606466
0.018488	-2.66031	BMP1
0.0180185	1.39399	PGPEP1
0.0151343	0.923305	SERPINB8
0.0165252	-1.11585	SMC4
0.0180747	1.9814	TRAFD1
0.0185285	-4.04524	HAS2
0.0179332	1.45006	FMO4
0.0131216	1.01603	FTHL17
0.012574	0.989487	IFI30
0.0171947	-2.24563	PDLIM1
0.0161264	1.34305	MALAT1
0.018547	-3.66918	CPLX1
0.0152751	-1.28814	MCM3
0.0180596	-2.91322	GGT5
0.0188356	1.65693	FAM83F
0.0169624	2.05146	SLC1A3
0.0185042	1.78516	MGC16275
0.0171572	2.65543	CD8B
0.0179207	1.21214	ZNF687
0.0171468	1.09095	EPG5
0.0174554	-2.83142	S100A3
0.0164481	-1.2645	B4GALT2
0.0178702	-1.35488	SYT15
0.0184989	-1.46707	ZHX3
0.0179216	-1.37865	RARRES1
0.0151284	-3.79127	SPARC
0.0177698	1.41972	STAT5A
0.0189664	1.62065	CDHR4
0.0159412	1.03481	NUB1
0.0183734	-2.05426	ZFP82
0.0171705	-2.11874	LIPG
0.0139854	1.36618	VAMP8
0.0158663	1.19665	TMEM170A
0.013499	0.848907	BRI3
0.0180024	1.42965	DHDDS
0.0185415	2.06911	SYT6
0.0182228	2.53296	DGKG
0.0189334	1.35942	OR10J3
0.0183954	1.95827	FGD2
0.0179129	-1.53537	FOXK1
0.0178934	-3.62119	PCDHB16
0.0187402	1.4095	PIK3CG
0.0174669	3.62048	OVOL2
0.0187147	2.46024	LPAR1
0.0161335	-1.18888	P4HA2
0.0183621	-1.93141	LINC01116
0.0180622	-1.33432	SPRED2
0.0172443	1.24005	GNA15
0.0186627	2.84159	STRIP2
0.019013	-1.31712	ADRA1B
0.0157395	1.02076	ACAA2
0.0175286	-1.84536	NR2F1-AS1
0.0181095	-1.32706	ACTR3B
0.0189612	1.32207	AP5B1
0.00931275	-0.593688	NDST4
0.0180889	1.6074	UBXN2B
0.0177939	2.12594	CA9
0.0157126	1.24355	GRINA
0.0160697	1.4096	TBC1D7
0.0163177	-1.32608	LOC100287869
0.0188565	1.29947	PAQR7
0.0158474	-1.10302	DCAF13
0.0182758	1.63554	KRTAP4-6
0.0166405	1.20474	ZNF124
0.0196846	1.89678	TMEM144
0.0161402	-1.0865	TRMT1
0.0181626	1.37544	ZCCHC2
0.0192206	-2.05889	EML2
0.0188496	1.31298	SAMD9
0.0183466	-2.70847	UNC13A
0.0182517	-1.24461	DHX33
0.0119523	-0.70597	SCTR
0.0158125	1.37997	CTSD
0.017072	1.49846	STX3
0.0194333	2.62126	AKAP3
0.0161792	-1.11358	TRIM24
0.018442	-5.94116	COL1A1
0.0179454	-2.15186	ULK1
0.0184618	-2.94045	NT5DC2
0.0195543	-2.08431	SATB2
0.0156121	1.40807	TRPV2
0.0197651	1.70298	WNT7A
0.0189065	-1.50286	SH3BP4
0.0190495	1.31977	MFSD8
0.0141446	-0.98829	RPS10
0.0190708	-1.27493	LOC729080
0.0168306	-1.5916	KCTD3
0.0197831	1.58373	MAZ
0.0199318	-3.39485	PRICKLE2
0.0179041	-3.30326	PYGO1
0.0201486	-1.35775	LSM11
0.0172269	1.21341	STK17B
0.0135436	-0.727314	ATF4
0.0191963	-2.93264	LEF1
0.020396	-2.20581	DSCC1
0.0195217	-3.3817	GPX8
0.0199054	-1.29824	MDFI
0.0200625	2.5158	PDE6G
0.0205021	2.06082	TENM3
0.0192514	-1.92027	MBD3
0.0198417	1.3748	PFKFB2
0.0185998	-1.14947	ZNF416
0.0168506	1.22972	GPSM3
0.0186658	-1.08572	ALDH1B1
0.0147798	-0.95836	RPL4
0.0176377	4.47343	RBM11
0.0193423	-2.64796	TMEM98
0.0191001	2.00052	AQP5
0.0169505	1.10221	GRB2
0.0197734	-1.27083	TYW3
0.0196867	-1.20186	CCDC181
0.0178387	1.27018	TPD52L2
0.019335	1.43156	ZMYM5
0.0190714	1.77696	KIRREL2
0.0192418	-1.65099	LOC100133091
0.0193778	-1.14664	TULP3
0.0179241	1.08089	CAPZA1
0.0172827	1.14986	LIMK1
0.0175101	1.35064	SMIM14
0.018877	1.82969	EPHA8
0.0180633	-3.70264	RYR2
0.018436	1.50072	HERC6
0.0190958	2.63407	NOD2
0.0197357	1.82172	SLC26A4-AS1
0.0190328	-2.51774	C1orf101
0.0206075	-4.62334	THBS2
0.0192375	-1.60868	FAM60A
0.0172499	-1.20397	PUS7
0.0175825	1.47846	DOCK11
0.0177683	1.81373	SGTB
0.0164533	-1.32502	GNA11
0.0179863	-3.73267	IGFBP3
0.0195322	1.32066	MPL
0.0204288	1.39226	SOHLH2
0.0171423	-1.40059	GRB10
0.0206753	1.59879	TUBA3FP
0.0212607	-1.46927	PCDHGB2
0.0203674	-1.74029	ADAMTS13
0.0196485	-1.67782	HILS1
0.0196363	-3.96709	RGS4
0.0173396	-0.93398	MRPL12
0.0192721	-1.17456	URB1
0.0185925	1.92705	DOK2
0.0193321	1.49837	ZEB2
0.0208635	-3.32488	BMP4
0.0202712	2.16423	GK5
0.0202227	-1.31537	DIP2C
0.0206772	2.0992	SFMBT2
0.0185471	-1.36318	PGM3
0.0207807	-2.62926	PDGFRA
0.0189643	-5.8095	ACTG2
0.0210425	-1.28572	CEP131
0.0188077	3.37792	ALAS2
0.020598	-1.74049	C17orf100
0.0174134	3.18171	NDRG4
0.0179209	2.16294	BATF2
0.0177179	-1.10266	OTUD4
0.0183208	1.42973	DOK3
0.0197666	3.70813	ETNPPL
0.0161315	1.07242	MARVELD3
0.0213111	2.55185	HRASLS2
0.0211396	-2.84873	BICD1
0.0213774	-1.49399	ZNF501
0.01898	1.12333	GAS2L3
0.0178768	-1.09211	GCSHP3
0.0186935	1.50829	ZBTB7B
0.0214434	1.3096	MAPK8IP3
0.0217225	1.5634	C9orf66
0.0184017	-1.34382	DANCR
0.0209748	-1.85643	BEGAIN
0.0208792	-1.72204	HSD17B1
0.0199759	1.92391	P2RX5
0.0172725	1.01467	DTNBP1
0.020003	1.39708	SGPP1
0.0100932	-0.490136	ZNF90
0.019955	-2.64744	BMP8B
0.0180482	-0.927266	IP6K2
0.0198567	-1.97947	DAPK3
0.0207658	-5.63522	VGLL3
0.0217626	1.31782	PSORS1C2
0.0209805	-2.32468	TPM1
0.0214364	-2.04631	ATP8B1
0.0193157	3.17317	LINC00238
0.021096	2.09215	EDN2
0.0204128	1.14739	PIP4K2C
0.0212585	1.23043	INTS6-AS1
0.0196927	-3.85665	PIEZO2
0.0176635	-1.57534	CKAP4
0.0189189	-1.38811	ALDH18A1
0.0199335	1.90636	MROH2A
0.0175078	-1.03452	GNL3
0.0198373	-1.77066	STAP2
0.0183098	1.89968	SERPING1
0.0208097	-1.42293	WHSC1
0.0197396	1.41854	DHRS12
0.0203506	-4.23015	ABCC9
0.0224014	-1.79838	RGS12
0.0198144	1.8312	MILR1
0.0183897	-0.970481	HNRNPA0
0.0212389	-1.51934	VLDLR
0.0215327	-1.2234	TMEM33
0.0194335	1.13098	TMEM9B
0.020686	1.35695	VAC14
0.0195976	-0.997775	RPGR
0.022	-2.55322	TSPAN9
0.0209961	-1.47677	RUNX1
0.0223016	2.07457	FCRL5
0.0189215	-1.07356	MYO6
0.0186783	1.16494	ARNTL
0.0189267	-1.75002	PHLDA1
0.013742	-0.749002	BLID
0.0222994	-2.69315	TBC1D16
0.0184824	-1.11585	LARP6
0.0211632	1.92415	FAM214B
0.0223866	1.80178	PRKCZ
0.0214785	1.54742	SYTL3
0.0209462	-1.2384	ZNF551
0.0186813	1.36079	B3GALT4
0.00949152	-0.439123	LOC100506236
0.0169241	0.852433	PNRC1
0.020893	-1.42197	STARD13
0.0186337	1.73841	MAPK13
0.0207271	-1.2084	TMEM185B
0.023006	1.71363	UGT8
0.0175879	-0.963945	EIF3B
0.0219254	-1.63658	HRC
0.0182241	-1.00992	ZNF444
0.0201487	-3.06704	PALM2
0.0220795	1.28656	PLXNA3
0.0187402	-1.3863	HIRA
0.0206876	-2.62596	SLC35F1
0.0166067	1.73715	LCP1
0.017603	1.6626	HEIH
0.018394	-1.31535	HIVEP2
0.0228658	-1.3366	FAM118A
0.0196668	1.16369	TAB3
0.02233	1.4078	RUBCN
0.0228296	-2.78842	TMEM108
0.0195222	1.13105	DOCK7
0.0219737	-2.63088	CGA
0.0230508	-1.90016	TLN2
0.0113743	-0.58883	PLPPR3
0.0225664	2.3549	DPCR1
0.0222703	-1.35042	ZDHHC9
0.0220011	-1.7199	ANO7
0.021123	2.14283	S100G
0.0190074	-0.911901	SEH1L
0.0176972	2.53224	C1QA
0.0162443	-0.883988	RPL13AP3
0.022635	-1.44913	RN7SL737P
0.0182375	-1.2464	NCLN
0.0204824	-1.37409	THG1L
0.0194627	-0.978293	HDAC5
0.0167189	1.14941	STK40
0.0173391	-1.0721	CCT3
0.0229898	1.5617	RAPGEF2
0.0217238	1.43197	LINC01126
0.0184152	-1.01145	C21orf59
0.0204782	1.29554	MUC2
0.0212682	-4.79564	FANK1
0.0222177	-5.08381	CSPG4
0.0206454	1.0953	MYO9B
0.0195702	1.12979	OSBPL11
0.0233834	3.21304	SLAMF6
0.0187431	2.39867	SDS
0.0234079	1.40695	PNMAL2
0.0190947	1.00618	NUCB2
0.0235084	2.96318	IFNG
0.0222354	2.52883	DNASE2B
0.0206575	-1.15983	RPP40
0.0190849	-2.26741	TMEM158
0.019742	1.05288	VPS33A
0.0198074	0.935461	MICU1
0.0224455	-2.48706	ATP6V0A4
0.0196517	1.13688	PARP9
0.0214196	-2.02744	PLCB1
0.0194575	1.0571	PIP4K2A
0.0182963	0.997096	ANXA2P1
0.0234452	-1.72542	ZNF682
0.0213103	1.9496	DTHD1
0.0189787	-1.80872	RRS1
0.0233814	-1.63765	PCDHGB4
0.0201539	1.02541	PCGF5
0.0243208	1.43194	USP49
0.0233317	-2.04467	CORO2B
0.0210612	-1.40551	TNFRSF4
0.0200869	-1.10247	RAB11FIP5
0.0193043	1.2212	LFNG
0.0242554	1.52328	ARRDC5
0.022214	2.72427	CDCP1
0.0243805	1.45114	GRM8
0.0200618	-1.63744	AGPAT5
0.0239227	2.30081	FLJ22763
0.0236282	-3.74135	FAM162B
0.0188371	1.62316	RGS1
0.024192	1.36218	CCDC88B
0.021777	2.14066	RFX4
0.0196499	1.26912	GMIP
0.023804	-1.60237	LOC100129503
0.0188964	-1.11845	KDELR2
0.0207545	-1.29109	WRN
0.0186455	1.47496	LAP3
0.0231409	-1.36232	ZNF507
0.0183148	-1.78283	SLC39A14
0.0212783	1.87581	TCHH
0.022007	-1.16844	IQSEC3
0.0187148	-1.32327	SCRIB
0.0244636	1.71678	FAM46B
0.0226277	-3.09791	SIX4
0.0231793	1.14134	TM2D2
0.0223677	-2.63728	NRCAM
0.0244517	-1.34364	COX4I2
0.0245922	1.52331	MACROD2
0.0245351	-1.8076	CACHD1
0.0226445	2.76842	CATSPERB
0.0177653	-1.63783	CSNK1E
0.0219497	2.68264	SCNN1B
0.0218066	-1.65236	BEND7
0.0212835	-1.20253	MEX3D
0.0213008	-1.36247	SFXN1
0.0169512	-0.994965	RPL36A
0.0247458	-2.63094	TMSB15A
0.0244493	-2.30125	SH3PXD2A
0.0208106	-1.12966	SMAD5
0.0234179	1.77677	NFYC
0.021986	-1.38824	ZNF77
0.021261	2.25394	LAIR1
0.0204752	2.11119	PQLC3
0.0220377	1.11866	PPP1R21
0.0239806	2.16902	CFAP161
0.0230473	-1.95738	NR2F6
0.0200066	0.882974	PSEN1
0.0210459	1.064	SFR1
0.0106718	-0.496983	FAXC
0.023178	1.1199	ERAP1
0.0228415	-2.48415	ARHGAP44
0.0197583	2.13683	GBP1
0.0227048	-1.32985	MRPL52
0.0223368	-1.30943	LINC00515
0.0139258	0.736395	LINC00977
0.0251709	-1.56653	PTPRD
0.0241425	-1.46816	ARVCF
0.0242495	4.11117	CYP2C8
0.0205801	-1.72686	IDI2
0.0201943	1.40155	SPINT2
0.0221779	1.29472	SLC37A1
0.0188545	1.49301	MESDC1
0.0244639	1.31004	ZDHHC21
0.0200945	-1.33234	MRPL24
0.0240905	1.39971	CCDC134
0.0207027	1.31428	XAF1
0.0204961	1.34162	PDP1
0.0202894	0.860553	RHOA
0.0237843	-2.23677	MTUS1
0.0231527	-2.18746	ARMC9
0.0200698	0.991417	IRF9
0.0241554	-1.23074	CYHR1
0.0207022	-0.890569	SGSM3
0.0233528	1.74965	MLPH
0.0243402	-1.9335	MANSC1
0.0196997	1.43983	EIF1B
0.0233581	-1.38296	SOX6
0.0223166	1.02885	PRR13
0.0205658	-1.02089	DPM3
0.0242	1.46544	MAX
0.0240922	1.34023	DUSP18
0.0251166	1.36112	LOC643406
0.0258691	1.29774	MTMR10
0.0233344	1.13268	RTN2
0.0202228	-1.05245	PUM3
0.0200628	-1.26879	TCOF1
0.023151	-2.63426	CD248
0.021184	-1.94348	PPFIBP1
0.0230897	1.08682	CRYBB3
0.0260162	1.42542	PAX7
0.025808	-2.88883	ZNF850
0.0211371	0.959739	MIOS
0.0215146	1.93805	HOXB4
0.0243974	-1.89176	SLC26A9
0.0206483	0.949796	ERP44
0.0209424	1.49645	TIGAR
0.0251046	2.64561	SLC14A1
0.0249085	-2.17086	ANKRD65
0.0244733	1.30264	HOXA1
0.021425	2.02838	RRAGD
0.0192247	1.03027	FAM197Y2P
0.0226242	-1.4892	ADCY9
0.020429	3.8683	SLCO4A1
0.0222234	1.13672	TMEM199
0.0197056	2.36175	PLA2G16
0.0253192	-2.00491	EFR3B
0.0220619	1.14872	DTX3L
0.0187918	1.38869	TAP1
0.0257909	-1.85902	ZNF285
0.0249689	1.67002	CNEP1R1
0.0238752	-2.37483	CCR4
0.0241658	-1.03661	ZNF112
0.0221471	-1.05513	MAP3K10
0.0185367	-1.16362	IER3
0.0242028	1.08598	RIT1
0.021369	1.78497	LGALS9C
0.0246044	-2.72003	HNF4G
0.0211495	0.901777	PIAS1
0.0254597	1.25301	POM121L1P
0.0244774	1.61958	HIVEP3
0.0212426	-2.81683	MICAL2
0.0244581	1.37549	AGO4
0.0234266	-1.68079	ZNF502
0.0212837	1.70499	GCA
0.0218292	-1.03572	MAFK
0.0242144	-3.49302	AOC3
0.0251349	-1.2603	ABLIM2
0.0273076	1.44278	DNAH2
0.0272154	1.63476	LINC00854
0.0206599	-0.99928	MARS
0.0270538	-1.49515	PPM1L
0.0215041	-1.00983	CBX1
0.0263676	1.74206	CDKN2A-AS1
0.0244608	1.56321	GFRA2
0.0272925	1.76484	RNASE7
0.0247308	1.27998	DUSP2
0.0206128	-0.797512	RCN1
0.0217667	1.09125	FOSL2
0.0265437	1.21021	FAM95B1
0.0253262	-1.94993	PCDHGB1
0.0230762	-1.21002	PLXNA2
0.0195845	0.782642	ATP1A1
0.022599	-1.38061	FKBP9
0.0218185	0.968036	VAV3
0.0223525	0.931261	PAPD4
0.0274453	1.73643	ADRA1A
0.020404	1.28378	GP9
0.0267082	-1.65587	OLFM2
0.0272323	1.47839	LINC00675
0.022609	-1.3985	NLE1
0.0239334	-1.08062	SERBP1
0.0275898	1.61331	CDHR1
0.0250162	1.4104	FBN3
0.0221058	1.41478	MICB
0.0276574	-1.6398	HOXD1
0.0222846	1.62749	SOAT1
0.0212209	0.894732	FAM21A
0.0221875	2.02542	LGALS9
0.021896	-1.30349	APEX1
0.0252178	3.70121	KRT7
0.0275737	1.57946	C11orf45
0.0217821	-0.994884	SYNJ2
0.0257885	1.40338	DTX2
0.0267947	1.33716	ATG3
0.0256032	1.56259	MAN2B2
0.0255241	-2.36052	E2F5
0.0256103	2.02162	KCNK13
0.0235547	-1.10075	RGP1
0.0183479	1.37165	TXN
0.0263216	-1.27693	RPS15A
0.0267413	1.68248	KCP
0.0258677	1.60645	TRGV5
0.0279412	1.94812	C2orf66
0.0268155	1.23858	MNDA
0.0195453	1.48329	HLA-DPB1
0.0260369	-4.44954	EDNRA
0.0265202	1.15124	ABHD11
0.025736	1.14586	SWT1
0.0137524	-0.566331	CA5BP1
0.0264125	1.31252	MOSPD2
0.0220491	-0.959422	NOLC1
0.0206178	-0.930128	SNRPD1
0.0278037	-3.36979	KCTD15
0.0216955	0.936194	SPAG9
0.0260383	1.56133	JAKMIP1
0.02302	5.99063	TIMD4
0.0230244	1.31353	TBC1D20
0.0231237	1.44507	MAN2B1
0.028251	-2.43004	ANKRD13B
0.0229808	-0.969134	IL6ST
0.0233257	-1.29573	NFIX
0.0234137	1.34771	EPB41L2
0.0212026	2.31248	NAMPT
0.0194757	-1.01709	RPSA
0.0221715	1.2685	PDXK
0.0278762	1.99539	POU2F2
0.0231405	0.867468	ARAP1
0.0218685	1.00035	DPH3
0.0271577	-1.9718	HID1
0.0214758	1.97726	NABP1
0.0216096	-0.796959	POLR2H
0.0229781	-5.02821	PCDH18
0.0275551	-1.46174	TTLL11
0.0266895	-1.81153	PASK
0.0239262	1.04804	B3GNT2
0.0218298	-1.07372	TNFAIP1
0.0227002	1.02836	EIF4E
0.0266175	-2.2084	PCDHGB7
0.026105	-2.07386	GSG2
0.0257818	-1.87208	NFYA
0.0276289	-1.86867	GOLGA2P7
0.0247855	-1.59153	TRIM32
0.0280763	-1.24196	LINC00165
0.0191757	-0.972248	RPL3
0.0141557	0.535782	MMP27
0.0287348	1.46458	GSTM2
0.0292544	-1.28369	PRKCE
0.0247155	0.947772	HPS1
0.0231948	0.869496	SEL1L
0.0162597	-0.657796	CCDC34
0.0230386	-1.50321	XYLT2
0.0291039	1.46419	FOXRED2
0.02239	0.872746	MECP2
0.0288794	-2.70483	LRRC73
0.0273689	1.22065	GFRA3
0.0259088	-5.25145	TRPC4
0.0290719	1.78457	SYT14
0.0236729	0.873252	ETNK1
0.0263741	1.63828	LDHD
0.0267243	1.0451	ITSN2
0.0251793	0.939341	ACTR2
0.0282287	-1.67822	NAA38
0.0260712	1.35937	BMP2K
0.019578	-0.785899	RPL13A
0.028704	-1.40756	ASB8
0.0236468	1.38906	CTNNBL1
0.0274955	3.12906	LILRA5
0.029162	2.06959	MIAT
0.0264592	1.24608	AP1G2
0.0261938	-1.7829	MC1R
0.0266991	2.13532	LPCAT2
0.0263648	-1.63051	POMT2
0.0233452	-1.48118	RABEPK
0.0258106	-1.23256	PANK3
0.0287942	-1.25293	PCDHGA12
0.0238395	0.863721	ADAM17
0.0290983	-1.27509	SPATC1L
0.0274598	3.74549	CD160
0.0250219	1.23474	KCTD8
0.0290816	-1.98685	TMEM200A
0.0197682	-1.02322	EEF1D
0.0233666	-0.855756	AMMECR1L
0.0289027	-2.16185	NT5DC3
0.0251876	0.903806	RAB29
0.022152	2.22362	TLR2
0.0245894	1.07517	REL
0.026322	-2.00039	GJB6
0.0189892	1.14933	CCL2
0.0278715	-1.2541	ADAM22
0.0233818	-2.78548	CARD10
0.0232665	1.82355	GIMAP5
0.0191525	-0.906978	NWD2
0.0261611	2.94342	SCG3
0.0278475	-1.06578	ANKRD16
0.0252122	3.51516	HSD11B1
0.0271822	1.41683	FAM105A
0.0255158	-1.3087	GALNT2
0.0266099	2.46751	DDX60L
0.0288541	-1.31822	BCL9
0.0300575	2.28855	TIFA
0.0264556	-2.53825	CLSTN2
0.0228895	-0.960807	UQCC3
0.0287936	-3.95028	NFASC
0.0277023	-1.36121	ZNF829
0.0258553	1.30383	DBNL
0.0294279	1.71844	PTGDR
0.0282906	1.41515	ORAI3
0.0259336	1.75106	RNASEL
0.0285794	1.16652	SMR3A
0.0297613	-2.32948	FAM90A1
0.0223206	1.29731	HLA-DQB1
0.0245164	-0.914584	PPP1R37
0.0201935	-1.36486	TGFBI
0.0289697	-1.5703	PRRX2
0.0295909	1.37776	ADGRG3
0.0232788	1.13712	FBXL5
0.03022	1.61716	LOC399716
0.0247659	-0.939766	HNRNPA1L2
0.0262	2.53642	LPCAT3
0.027654	-3.8361	FCRLA
0.0230821	1.1198	ITPK1
0.025472	-2.11435	CD3EAP
0.0263641	0.917602	NRBF2
0.0234445	-1.16994	CITED4
0.0199685	-0.742769	RPL27
0.0207741	0.680922	CCAT1
0.030156	-2.99822	BGN
0.0306592	2.85105	FOXP2
0.0286954	2.98567	PKIB
0.0280726	1.37618	AKIRIN2
0.0304452	1.79817	NAT2
0.0245084	-1.14597	RAI1
0.0257369	1.22048	CXCR3
0.0307321	2.29246	DSCAML1
0.0253202	1.04311	PFKFB3
0.0191194	-0.859078	LAMA1
0.0238008	1.34058	HLA-DMA
0.0299699	2.09282	DTX1
0.026027	4.01967	HSD17B13
0.0241806	2.15763	C1orf162
0.0292732	1.10727	WHRN
0.0258183	-1.16018	MNAT1
0.024711	0.939049	CCDC115
0.0301033	-1.19082	MYL3
0.025241	1.39491	GSAP
0.0185094	0.852876	LOC284244
0.0275872	-1.43949	TRAF4
0.0196128	-0.716112	RPL35A
0.0254771	-1.11834	FRAT2
0.0273741	-2.82246	CACNA2D3
0.0245598	-0.967935	ACBD6
0.0250642	-0.920816	PNKD
0.027173	1.08665	C11orf71
0.0303017	-1.51852	SLC45A4
0.0295281	-1.26624	TINAGL1
[truncated: 17,553 more rows]
