# Supplementary material for: Efficient analysis of the toxicity and mechanisms of Hexaconazole and two other triazole fungicides: insights from integrated network toxicology, molecular docking and bioinformatics data
Source: Research Square preprint supplement (doi:10.21203/rs.3.rs-5318182/v1), 2024-10-29
Supplement: Supplementary file 5 [file 9525c0aaa2531bc3fe85c2f3.xlsx]

## Sheet: Enrichment-HA and Brain injury
GroupID	Category	Term	Description	LogP	Log(q-value)	Genes	Symbols	InTerm_InList
1_Summary	GO Biological Processes	GO:1901699	cellular response to nitrogen compound	-36.6358	-32.2891	142,760,836,839,840,890,1017,1020,1111,1585,2562,2566,2915,2932,3164,3480,3643,3716,3717,3718,3753,3784,4193,4780,5290,5468,5594,5663,5724,5743,5747,7297,8851,11255,23385,120892,1432,1956,2099,2322,2908,4306,5241,5467,7068,7298,7421,8644	PARP1,CA2,CASP3,CASP6,CASP7,CCNA2,CDK2,CDK5,CHEK1,CYP11B2,GABRB3,GABRG2,GRM5,GSK3B,NR4A1,IGF1R,INSR,JAK1,JAK2,JAK3,KCNE1,KCNQ1,MDM2,NFE2L2,PIK3CA,PPARG,MAPK1,PSEN1,PTAFR,PTGS2,PTK2,TYK2,CDK5R1,HRH3,NCSTN,LRRK2,MAPK14,EGFR,ESR1,FLT3,NR3C1,NR3C2,PGR,PPARD,THRB,TYMS,VDR,AKR1C3	48/-
1_Member	GO Biological Processes	GO:1901699	cellular response to nitrogen compound	-36.6358	-32.2891	142,760,836,839,840,890,1017,1020,1111,1585,2562,2566,2915,2932,3164,3480,3643,3716,3717,3718,3753,3784,4193,4780,5290,5468,5594,5663,5724,5743,5747,7297,8851,11255,23385,120892	PARP1,CA2,CASP3,CASP6,CASP7,CCNA2,CDK2,CDK5,CHEK1,CYP11B2,GABRB3,GABRG2,GRM5,GSK3B,NR4A1,IGF1R,INSR,JAK1,JAK2,JAK3,KCNE1,KCNQ1,MDM2,NFE2L2,PIK3CA,PPARG,MAPK1,PSEN1,PTAFR,PTGS2,PTK2,TYK2,CDK5R1,HRH3,NCSTN,LRRK2	36/582
1_Member	GO Biological Processes	GO:0071417	cellular response to organonitrogen compound	-34.1079	-30.0622	142,760,836,839,840,890,1020,1111,1585,2562,2566,2915,2932,3164,3480,3643,3716,3717,3718,3753,3784,4193,4780,5290,5468,5594,5663,5724,5743,5747,7297,23385,120892	PARP1,CA2,CASP3,CASP6,CASP7,CCNA2,CDK5,CHEK1,CYP11B2,GABRB3,GABRG2,GRM5,GSK3B,NR4A1,IGF1R,INSR,JAK1,JAK2,JAK3,KCNE1,KCNQ1,MDM2,NFE2L2,PIK3CA,PPARG,MAPK1,PSEN1,PTAFR,PTGS2,PTK2,TYK2,NCSTN,LRRK2	33/507
1_Member	GO Biological Processes	GO:0009725	response to hormone	-29.0752	-25.3305	142,760,836,890,1432,1585,1956,2099,2322,2908,2932,3164,3480,3643,3716,3717,3718,3784,4193,4306,4780,5241,5290,5467,5468,5594,5724,5743,5747,7068,7297,7298,7421,8644	PARP1,CA2,CASP3,CCNA2,MAPK14,CYP11B2,EGFR,ESR1,FLT3,NR3C1,GSK3B,NR4A1,IGF1R,INSR,JAK1,JAK2,JAK3,KCNQ1,MDM2,NR3C2,NFE2L2,PGR,PIK3CA,PPARD,PPARG,MAPK1,PTAFR,PTGS2,PTK2,THRB,TYK2,TYMS,VDR,AKR1C3	34/795
1_Member	GO Biological Processes	GO:0032870	cellular response to hormone stimulus	-26.5392	-22.9706	142,760,890,1585,1956,2099,2322,2908,2932,3164,3480,3643,3716,3717,3718,4193,4306,4780,5241,5290,5467,5468,5594,5747,7068,7297,7421,8644	PARP1,CA2,CCNA2,CYP11B2,EGFR,ESR1,FLT3,NR3C1,GSK3B,NR4A1,IGF1R,INSR,JAK1,JAK2,JAK3,MDM2,NR3C2,NFE2L2,PGR,PIK3CA,PPARD,PPARG,MAPK1,PTK2,THRB,TYK2,VDR,AKR1C3	28/514
1_Member	GO Biological Processes	GO:0043434	response to peptide hormone	-19.8702	-16.6026	142,760,890,1432,1585,2932,3164,3480,3643,3716,3717,3718,3784,4193,4780,5290,5468,5594,5743,5747,7297	PARP1,CA2,CCNA2,MAPK14,CYP11B2,GSK3B,NR4A1,IGF1R,INSR,JAK1,JAK2,JAK3,KCNQ1,MDM2,NFE2L2,PIK3CA,PPARG,MAPK1,PTGS2,PTK2,TYK2	21/380
1_Member	GO Biological Processes	GO:0071375	cellular response to peptide hormone stimulus	-19.1312	-15.9306	142,760,890,1585,2932,3164,3480,3643,3716,3717,3718,4193,4780,5290,5468,5594,5747,7297	PARP1,CA2,CCNA2,CYP11B2,GSK3B,NR4A1,IGF1R,INSR,JAK1,JAK2,JAK3,MDM2,NFE2L2,PIK3CA,PPARG,MAPK1,PTK2,TYK2	18/248
2_Summary	GO Biological Processes	GO:0071407	cellular response to organic cyclic compound	-32.1879	-28.3183	836,839,840,841,846,890,983,1066,1111,1956,2099,2322,2562,2566,2908,2932,3480,3717,3753,3784,4193,4306,5241,5467,5594,5724,5743,7421,8644,23385,120892,834,1432,2263,5599	CASP3,CASP6,CASP7,CASP8,CASR,CCNA2,CDK1,CES1,CHEK1,EGFR,ESR1,FLT3,GABRB3,GABRG2,NR3C1,GSK3B,IGF1R,JAK2,KCNE1,KCNQ1,MDM2,NR3C2,PGR,PPARD,MAPK1,PTAFR,PTGS2,VDR,AKR1C3,NCSTN,LRRK2,CASP1,MAPK14,FGFR2,MAPK8	35/-
2_Member	GO Biological Processes	GO:0071407	cellular response to organic cyclic compound	-32.1879	-28.3183	836,839,840,841,846,890,983,1066,1111,1956,2099,2322,2562,2566,2908,2932,3480,3717,3753,3784,4193,4306,5241,5467,5594,5724,5743,7421,8644,23385,120892	CASP3,CASP6,CASP7,CASP8,CASR,CCNA2,CDK1,CES1,CHEK1,EGFR,ESR1,FLT3,GABRB3,GABRG2,NR3C1,GSK3B,IGF1R,JAK2,KCNE1,KCNQ1,MDM2,NR3C2,PGR,PPARD,MAPK1,PTAFR,PTGS2,VDR,AKR1C3,NCSTN,LRRK2	31/467
2_Member	GO Biological Processes	GO:0071396	cellular response to lipid	-18.0608	-14.8902	834,840,846,890,1066,1432,1956,2099,2263,2322,2908,2932,3480,3717,4306,5241,5467,5594,5599,5724,7421,8644	CASP1,CASP7,CASR,CCNA2,CES1,MAPK14,EGFR,ESR1,FGFR2,FLT3,NR3C1,GSK3B,IGF1R,JAK2,NR3C2,PGR,PPARD,MAPK1,MAPK8,PTAFR,VDR,AKR1C3	22/536
3_Summary	KEGG Pathway	hsa05200	Pathways in cancer	-27.5173	-23.8696	836,840,841,890,898,1017,1956,2099,2260,2263,2322,2932,3480,3716,3717,3718,4193,4312,4780,5290,5467,5468,5594,5599,5602,5743,5747,7015,8900,1432,7297,5663,983,1111,5243,3164	CASP3,CASP7,CASP8,CCNA2,CCNE1,CDK2,EGFR,ESR1,FGFR1,FGFR2,FLT3,GSK3B,IGF1R,JAK1,JAK2,JAK3,MDM2,MMP1,NFE2L2,PIK3CA,PPARD,PPARG,MAPK1,MAPK8,MAPK10,PTGS2,PTK2,TERT,CCNA1,MAPK14,TYK2,PSEN1,CDK1,CHEK1,ABCB1,NR4A1	36/-
3_Member	KEGG Pathway	hsa05200	Pathways in cancer	-27.5173	-23.8696	836,840,841,890,898,1017,1956,2099,2260,2263,2322,2932,3480,3716,3717,3718,4193,4312,4780,5290,5467,5468,5594,5599,5602,5743,5747,7015,8900	CASP3,CASP7,CASP8,CCNA2,CCNE1,CDK2,EGFR,ESR1,FGFR1,FGFR2,FLT3,GSK3B,IGF1R,JAK1,JAK2,JAK3,MDM2,MMP1,NFE2L2,PIK3CA,PPARD,PPARG,MAPK1,MAPK8,MAPK10,PTGS2,PTK2,TERT,CCNA1	29/533
3_Member	KEGG Pathway	hsa05161	Hepatitis B	-17.5229	-14.4315	836,841,890,898,1017,1432,3716,3717,3718,5290,5594,5599,5602,7297,8900	CASP3,CASP8,CCNA2,CCNE1,CDK2,MAPK14,JAK1,JAK2,JAK3,PIK3CA,MAPK1,MAPK8,MAPK10,TYK2,CCNA1	15/163
3_Member	KEGG Pathway	hsa05165	Human papillomavirus infection	-15.4978	-12.549	836,841,890,898,1017,1956,2932,3716,4193,5290,5594,5663,5743,5747,7015,7297,8900	CASP3,CASP8,CCNA2,CCNE1,CDK2,EGFR,GSK3B,JAK1,MDM2,PIK3CA,MAPK1,PSEN1,PTGS2,PTK2,TERT,TYK2,CCNA1	17/333
3_Member	KEGG Pathway	hsa05169	Epstein-Barr virus infection	-14.602	-11.7467	836,841,890,898,1017,1432,3716,3718,4193,5290,5599,5602,7297,8900	CASP3,CASP8,CCNA2,CCNE1,CDK2,MAPK14,JAK1,JAK3,MDM2,PIK3CA,MAPK8,MAPK10,TYK2,CCNA1	14/203
3_Member	KEGG Pathway	hsa05203	Viral carcinogenesis	-13.109	-10.4525	836,841,890,898,983,1017,1111,3716,3718,4193,5290,5594,8900	CASP3,CASP8,CCNA2,CCNE1,CDK1,CDK2,CHEK1,JAK1,JAK3,MDM2,PIK3CA,MAPK1,CCNA1	13/205
3_Member	KEGG Pathway	hsa05215	Prostate cancer	-12.2532	-9.68461	898,1017,1956,2260,2263,2932,3480,4193,5290,5594	CCNE1,CDK2,EGFR,FGFR1,FGFR2,GSK3B,IGF1R,MDM2,PIK3CA,MAPK1	10/98
3_Member	KEGG Pathway	hsa05162	Measles	-12.2047	-9.65039	836,841,898,1017,2932,3716,3718,5290,5599,5602,7297	CASP3,CASP8,CCNE1,CDK2,GSK3B,JAK1,JAK3,PIK3CA,MAPK8,MAPK10,TYK2	11/139
3_Member	KEGG Pathway	hsa05166	Human T-cell leukemia virus 1 infection	-11.2842	-8.84061	890,898,1017,1111,3716,3718,5290,5594,5599,5602,7015,8900	CCNA2,CCNE1,CDK2,CHEK1,JAK1,JAK3,PIK3CA,MAPK1,MAPK8,MAPK10,TERT,CCNA1	12/223
3_Member	KEGG Pathway	hsa05163	Human cytomegalovirus infection	-9.90883	-7.71844	836,841,1432,1956,2932,3716,4193,5290,5594,5743,5747	CASP3,CASP8,MAPK14,EGFR,GSK3B,JAK1,MDM2,PIK3CA,MAPK1,PTGS2,PTK2	11/226
3_Member	KEGG Pathway	hsa05226	Gastric cancer	-8.98656	-6.88781	898,1017,1956,2263,2932,5243,5290,5594,7015	CCNE1,CDK2,EGFR,FGFR2,GSK3B,ABCB1,PIK3CA,MAPK1,TERT	9/150
3_Member	KEGG Pathway	hsa05160	Hepatitis C	-8.76256	-6.70364	836,841,1017,1956,2932,3716,5290,5594,7297	CASP3,CASP8,CDK2,EGFR,GSK3B,JAK1,PIK3CA,MAPK1,TYK2	9/159
3_Member	KEGG Pathway	hsa04934	Cushing syndrome	-5.04226	-3.46937	898,1017,1956,2932,3164,5594	CCNE1,CDK2,EGFR,GSK3B,NR4A1,MAPK1	6/155
4_Summary	GO Biological Processes	GO:0016310	phosphorylation	-23.0578	-19.5562	898,983,1017,1020,1111,1432,1956,2260,2263,2322,2932,3480,3643,3716,3717,3718,3791,5290,5594,5599,5602,5747,6790,7297,8851,120892,23476,4193,3164,4170,836,142,846,890,2908,5468,841,2099,5241,5663,5743,7137,7421,5467,8644,10060,4780,5724,7015,1268,2915	CCNE1,CDK1,CDK2,CDK5,CHEK1,MAPK14,EGFR,FGFR1,FGFR2,FLT3,GSK3B,IGF1R,INSR,JAK1,JAK2,JAK3,KDR,PIK3CA,MAPK1,MAPK8,MAPK10,PTK2,AURKA,TYK2,CDK5R1,LRRK2,BRD4,MDM2,NR4A1,MCL1,CASP3,PARP1,CASR,CCNA2,NR3C1,PPARG,CASP8,ESR1,PGR,PSEN1,PTGS2,TNNI3,VDR,PPARD,AKR1C3,ABCC9,NFE2L2,PTAFR,TERT,CNR1,GRM5	51/-
4_Member	GO Biological Processes	GO:0016310	phosphorylation	-23.0578	-19.5562	898,983,1017,1020,1111,1432,1956,2260,2263,2322,2932,3480,3643,3716,3717,3718,3791,5290,5594,5599,5602,5747,6790,7297,8851,120892	CCNE1,CDK1,CDK2,CDK5,CHEK1,MAPK14,EGFR,FGFR1,FGFR2,FLT3,GSK3B,IGF1R,INSR,JAK1,JAK2,JAK3,KDR,PIK3CA,MAPK1,MAPK8,MAPK10,PTK2,AURKA,TYK2,CDK5R1,LRRK2	26/547
4_Member	GO Biological Processes	GO:0006468	protein phosphorylation	-22.9154	-19.4717	898,983,1017,1020,1111,1432,1956,2260,2263,2322,2932,3480,3643,3716,3717,3718,3791,5594,5599,5602,5747,6790,7297,8851,120892	CCNE1,CDK1,CDK2,CDK5,CHEK1,MAPK14,EGFR,FGFR1,FGFR2,FLT3,GSK3B,IGF1R,INSR,JAK1,JAK2,JAK3,KDR,MAPK1,MAPK8,MAPK10,PTK2,AURKA,TYK2,CDK5R1,LRRK2	25/489
4_Member	GO Molecular Functions	GO:0004672	protein kinase activity	-22.7204	-19.328	983,1017,1020,1111,1432,1956,2260,2263,2322,2932,3480,3643,3716,3717,3718,3791,5290,5594,5599,5602,5747,6790,7297,8851,23476,120892	CDK1,CDK2,CDK5,CHEK1,MAPK14,EGFR,FGFR1,FGFR2,FLT3,GSK3B,IGF1R,INSR,JAK1,JAK2,JAK3,KDR,PIK3CA,MAPK1,MAPK8,MAPK10,PTK2,AURKA,TYK2,CDK5R1,BRD4,LRRK2	26/564
4_Member	GO Molecular Functions	GO:0016301	kinase activity	-21.1925	-17.8458	898,983,1017,1020,1111,1432,1956,2260,2263,2322,2932,3480,3643,3716,3717,3718,3791,5290,5594,5599,5602,5747,6790,7297,8851,23476,120892	CCNE1,CDK1,CDK2,CDK5,CHEK1,MAPK14,EGFR,FGFR1,FGFR2,FLT3,GSK3B,IGF1R,INSR,JAK1,JAK2,JAK3,KDR,PIK3CA,MAPK1,MAPK8,MAPK10,PTK2,AURKA,TYK2,CDK5R1,BRD4,LRRK2	27/726
4_Member	GO Molecular Functions	GO:0016773	phosphotransferase activity, alcohol group as acceptor	-20.8039	-17.4986	983,1017,1020,1111,1432,1956,2260,2263,2322,2932,3480,3643,3716,3717,3718,3791,5290,5594,5599,5602,5747,6790,7297,8851,23476,120892	CDK1,CDK2,CDK5,CHEK1,MAPK14,EGFR,FGFR1,FGFR2,FLT3,GSK3B,IGF1R,INSR,JAK1,JAK2,JAK3,KDR,PIK3CA,MAPK1,MAPK8,MAPK10,PTK2,AURKA,TYK2,CDK5R1,BRD4,LRRK2	26/672
4_Member	GO Biological Processes	GO:0018193	peptidyl-amino acid modification	-19.6971	-16.4643	983,1017,1020,1111,1432,1956,2260,2263,2322,2932,3480,3643,3716,3717,3718,3791,4193,5594,5599,5747,6790,8851,120892	CDK1,CDK2,CDK5,CHEK1,MAPK14,EGFR,FGFR1,FGFR2,FLT3,GSK3B,IGF1R,INSR,JAK1,JAK2,JAK3,KDR,MDM2,MAPK1,MAPK8,PTK2,AURKA,CDK5R1,LRRK2	23/516
4_Member	KEGG Pathway	hsa04151	PI3K-Akt signaling pathway	-17.5437	-14.4315	898,1017,1956,2260,2263,2322,2932,3164,3480,3643,3716,3717,3718,3791,4170,4193,5290,5594,5747	CCNE1,CDK2,EGFR,FGFR1,FGFR2,FLT3,GSK3B,NR4A1,IGF1R,INSR,JAK1,JAK2,JAK3,KDR,MCL1,MDM2,PIK3CA,MAPK1,PTK2	19/362
4_Member	GO Biological Processes	GO:0018108	peptidyl-tyrosine phosphorylation	-15.9677	-12.9634	1956,2260,2263,2322,3480,3643,3716,3717,3718,3791,5747	EGFR,FGFR1,FGFR2,FLT3,IGF1R,INSR,JAK1,JAK2,JAK3,KDR,PTK2	11/65
4_Member	GO Biological Processes	GO:0018212	peptidyl-tyrosine modification	-15.8128	-12.8278	1956,2260,2263,2322,3480,3643,3716,3717,3718,3791,5747	EGFR,FGFR1,FGFR2,FLT3,IGF1R,INSR,JAK1,JAK2,JAK3,KDR,PTK2	11/67
4_Member	GO Biological Processes	GO:0007169	cell surface receptor protein tyrosine kinase signaling pathway	-15.0241	-12.1088	836,1432,1956,2260,2263,2322,2932,3480,3643,3716,3717,3718,3791,5290,5594,5747,7297,8851	CASP3,MAPK14,EGFR,FGFR1,FGFR2,FLT3,GSK3B,IGF1R,INSR,JAK1,JAK2,JAK3,KDR,PIK3CA,MAPK1,PTK2,TYK2,CDK5R1	18/423
4_Member	GO Biological Processes	GO:0070848	response to growth factor	-14.6239	-11.7543	142,836,846,890,1432,1956,2260,2263,2322,2908,3164,3480,3643,3791,4193,5290,5468,5594,5747	PARP1,CASP3,CASR,CCNA2,MAPK14,EGFR,FGFR1,FGFR2,FLT3,NR3C1,NR4A1,IGF1R,INSR,KDR,MDM2,PIK3CA,PPARG,MAPK1,PTK2	19/522
4_Member	GO Biological Processes	GO:0007167	enzyme-linked receptor protein signaling pathway	-14.4304	-11.6151	142,836,1432,1956,2260,2263,2322,2932,3480,3643,3716,3717,3718,3791,5290,5468,5594,5747,7297,8851	PARP1,CASP3,MAPK14,EGFR,FGFR1,FGFR2,FLT3,GSK3B,IGF1R,INSR,JAK1,JAK2,JAK3,KDR,PIK3CA,PPARG,MAPK1,PTK2,TYK2,CDK5R1	20/618
4_Member	GO Biological Processes	GO:0071363	cellular response to growth factor stimulus	-13.9226	-11.1771	142,836,846,890,1432,1956,2260,2263,2322,2908,3164,3480,3643,3791,4193,5290,5468,5747	PARP1,CASP3,CASR,CCNA2,MAPK14,EGFR,FGFR1,FGFR2,FLT3,NR3C1,NR4A1,IGF1R,INSR,KDR,MDM2,PIK3CA,PPARG,PTK2	18/490
4_Member	GO Molecular Functions	GO:0004713	protein tyrosine kinase activity	-13.7758	-11.0418	1956,2260,2263,2322,3480,3643,3716,3717,3718,3791,5747,7297	EGFR,FGFR1,FGFR2,FLT3,IGF1R,INSR,JAK1,JAK2,JAK3,KDR,PTK2,TYK2	12/138
4_Member	GO Biological Processes	GO:0046777	protein autophosphorylation	-13.1648	-10.4961	1956,2260,2263,2322,2932,3480,3643,3717,3791,5747,6790,120892	EGFR,FGFR1,FGFR2,FLT3,GSK3B,IGF1R,INSR,JAK2,KDR,PTK2,AURKA,LRRK2	12/155
4_Member	KEGG Pathway	hsa01521	EGFR tyrosine kinase inhibitor resistance	-11.4633	-8.98576	1956,2263,2932,3480,3716,3717,3791,5290,5594	EGFR,FGFR2,GSK3B,IGF1R,JAK1,JAK2,KDR,PIK3CA,MAPK1	9/80
4_Member	GO Biological Processes	GO:0035239	tube morphogenesis	-11.437	-8.96537	836,841,846,1432,1956,2099,2260,2263,2908,3164,3791,5241,5290,5663,5743,5747,7137,7421	CASP3,CASP8,CASR,MAPK14,EGFR,ESR1,FGFR1,FGFR2,NR3C1,NR4A1,KDR,PGR,PIK3CA,PSEN1,PTGS2,PTK2,TNNI3,VDR	18/688
4_Member	KEGG Pathway	hsa04010	MAPK signaling pathway	-11.0079	-8.61543	836,1432,1956,2260,2263,2322,3164,3480,3643,3791,5594,5599,5602	CASP3,MAPK14,EGFR,FGFR1,FGFR2,FLT3,NR4A1,IGF1R,INSR,KDR,MAPK1,MAPK8,MAPK10	13/300
4_Member	GO Biological Processes	GO:0051897	positive regulation of phosphatidylinositol 3-kinase/protein kinase B signal transduction	-10.7939	-8.43845	1956,2260,2322,3480,3643,3717,3791,5290,5467,5747,8644	EGFR,FGFR1,FLT3,IGF1R,INSR,JAK2,KDR,PIK3CA,PPARD,PTK2,AKR1C3	11/187
4_Member	KEGG Pathway	hsa04550	Signaling pathways regulating pluripotency of stem cells	-10.5648	-8.26131	1432,2260,2263,2932,3480,3716,3717,3718,5290,5594	MAPK14,FGFR1,FGFR2,GSK3B,IGF1R,JAK1,JAK2,JAK3,PIK3CA,MAPK1	10/144
4_Member	KEGG Pathway	hsa04014	Ras signaling pathway	-9.66931	-7.49577	1956,2260,2263,2322,3480,3643,3791,5290,5594,5599,5602	EGFR,FGFR1,FGFR2,FLT3,IGF1R,INSR,KDR,PIK3CA,MAPK1,MAPK8,MAPK10	11/238
4_Member	GO Molecular Functions	GO:0004714	transmembrane receptor protein tyrosine kinase activity	-9.13196	-7.01055	1956,2260,2263,2322,3480,3643,3791	EGFR,FGFR1,FGFR2,FLT3,IGF1R,INSR,KDR	7/60
4_Member	GO Biological Processes	GO:0051896	regulation of phosphatidylinositol 3-kinase/protein kinase B signal transduction	-9.03893	-6.93772	1956,2260,2322,3480,3643,3717,3791,5290,5467,5747,8644	EGFR,FGFR1,FLT3,IGF1R,INSR,JAK2,KDR,PIK3CA,PPARD,PTK2,AKR1C3	11/273
4_Member	GO Biological Processes	GO:0001568	blood vessel development	-8.96416	-6.87512	841,1432,2260,2263,3164,3791,4193,5290,5594,5663,5743,5747,7137,10060	CASP8,MAPK14,FGFR1,FGFR2,NR4A1,KDR,MDM2,PIK3CA,MAPK1,PSEN1,PTGS2,PTK2,TNNI3,ABCC9	14/533
4_Member	GO Biological Processes	GO:0040017	positive regulation of locomotion	-8.9348	-6.84815	841,846,1956,2260,3480,3643,3717,3791,4193,4780,5594,5724,5743,5747,7015	CASP8,CASR,EGFR,FGFR1,IGF1R,INSR,JAK2,KDR,MDM2,NFE2L2,MAPK1,PTAFR,PTGS2,PTK2,TERT	15/637
4_Member	KEGG Pathway	hsa04015	Rap1 signaling pathway	-8.91446	-6.83018	1268,1432,1956,2260,2263,3480,3643,3791,5290,5594	CNR1,MAPK14,EGFR,FGFR1,FGFR2,IGF1R,INSR,KDR,PIK3CA,MAPK1	10/212
4_Member	GO Biological Processes	GO:0001944	vasculature development	-8.74906	-6.69459	841,1432,2260,2263,3164,3791,4193,5290,5594,5663,5743,5747,7137,10060	CASP8,MAPK14,FGFR1,FGFR2,NR4A1,KDR,MDM2,PIK3CA,MAPK1,PSEN1,PTGS2,PTK2,TNNI3,ABCC9	14/554
4_Member	GO Biological Processes	GO:0030335	positive regulation of cell migration	-8.35433	-6.352	841,1956,2260,3480,3643,3717,3791,4193,4780,5594,5724,5743,5747,7015	CASP8,EGFR,FGFR1,IGF1R,INSR,JAK2,KDR,MDM2,NFE2L2,MAPK1,PTAFR,PTGS2,PTK2,TERT	14/595
4_Member	GO Molecular Functions	GO:0019199	transmembrane receptor protein kinase activity	-8.27729	-6.2904	1956,2260,2263,2322,3480,3643,3791	EGFR,FGFR1,FGFR2,FLT3,IGF1R,INSR,KDR	7/79
4_Member	GO Biological Processes	GO:2000147	positive regulation of cell motility	-8.10202	-6.14799	841,1956,2260,3480,3643,3717,3791,4193,4780,5594,5724,5743,5747,7015	CASP8,EGFR,FGFR1,IGF1R,INSR,JAK2,KDR,MDM2,NFE2L2,MAPK1,PTAFR,PTGS2,PTK2,TERT	14/623
4_Member	GO Biological Processes	GO:0051347	positive regulation of transferase activity	-7.74186	-5.84074	1956,2260,2263,2322,3480,3643,3717,3791,5594,5747,120892	EGFR,FGFR1,FGFR2,FLT3,IGF1R,INSR,JAK2,KDR,MAPK1,PTK2,LRRK2	11/364
4_Member	GO Biological Processes	GO:0033674	positive regulation of kinase activity	-7.58582	-5.70597	1956,2260,2263,2322,3480,3643,3717,3791,5747,120892	EGFR,FGFR1,FGFR2,FLT3,IGF1R,INSR,JAK2,KDR,PTK2,LRRK2	10/292
4_Member	GO Biological Processes	GO:0010562	positive regulation of phosphorus metabolic process	-7.52395	-5.6601	1956,2260,2263,2322,3480,3643,3717,3791,5594,5663,5724,5743,5747,120892	EGFR,FGFR1,FGFR2,FLT3,IGF1R,INSR,JAK2,KDR,MAPK1,PSEN1,PTAFR,PTGS2,PTK2,LRRK2	14/693
4_Member	GO Biological Processes	GO:0045937	positive regulation of phosphate metabolic process	-7.52395	-5.6601	1956,2260,2263,2322,3480,3643,3717,3791,5594,5663,5724,5743,5747,120892	EGFR,FGFR1,FGFR2,FLT3,IGF1R,INSR,JAK2,KDR,MAPK1,PSEN1,PTAFR,PTGS2,PTK2,LRRK2	14/693
4_Member	GO Biological Processes	GO:0042327	positive regulation of phosphorylation	-7.24655	-5.41325	1956,2260,2263,2322,3480,3643,3717,3791,5594,5663,5743,5747,120892	EGFR,FGFR1,FGFR2,FLT3,IGF1R,INSR,JAK2,KDR,MAPK1,PSEN1,PTGS2,PTK2,LRRK2	13/614
4_Member	GO Biological Processes	GO:0043408	regulation of MAPK cascade	-6.87736	-5.09293	846,1956,2260,2263,2322,2915,3480,3643,3717,3791,5468,5594,120892	CASR,EGFR,FGFR1,FGFR2,FLT3,GRM5,IGF1R,INSR,JAK2,KDR,PPARG,MAPK1,LRRK2	13/661
4_Member	GO Molecular Functions	GO:0019838	growth factor binding	-6.65931	-4.89917	1956,2260,2263,2322,3480,3643,3791	EGFR,FGFR1,FGFR2,FLT3,IGF1R,INSR,KDR	7/135
4_Member	GO Biological Processes	GO:0043410	positive regulation of MAPK cascade	-6.64965	-4.89287	846,1956,2260,2263,2322,2915,3480,3643,3717,3791,120892	CASR,EGFR,FGFR1,FGFR2,FLT3,GRM5,IGF1R,INSR,JAK2,KDR,LRRK2	11/467
4_Member	GO Biological Processes	GO:0048514	blood vessel morphogenesis	-5.9714	-4.29307	841,1432,2260,2263,3164,3791,5290,5743,5747,7137	CASP8,MAPK14,FGFR1,FGFR2,NR4A1,KDR,PIK3CA,PTGS2,PTK2,TNNI3	10/437
4_Member	GO Biological Processes	GO:0001525	angiogenesis	-5.89486	-4.22666	841,1432,2260,2263,3164,3791,5290,5743,5747	CASP8,MAPK14,FGFR1,FGFR2,NR4A1,KDR,PIK3CA,PTGS2,PTK2	9/344
4_Member	GO Biological Processes	GO:0001934	positive regulation of protein phosphorylation	-5.80849	-4.14572	1956,2260,2322,3643,3717,3791,5594,5663,5743,5747,120892	EGFR,FGFR1,FLT3,INSR,JAK2,KDR,MAPK1,PSEN1,PTGS2,PTK2,LRRK2	11/569
4_Member	GO Biological Processes	GO:0043405	regulation of MAP kinase activity	-5.50139	-3.87565	1956,2260,2322,3643,5468,120892	EGFR,FGFR1,FLT3,INSR,PPARG,LRRK2	6/129
4_Member	GO Biological Processes	GO:0031401	positive regulation of protein modification process	-5.41721	-3.79803	1956,2260,2322,2932,3643,3717,3791,5594,5663,5743,5747,120892	EGFR,FGFR1,FLT3,GSK3B,INSR,JAK2,KDR,MAPK1,PSEN1,PTGS2,PTK2,LRRK2	12/755
4_Member	GO Biological Processes	GO:0043406	positive regulation of MAP kinase activity	-5.31669	-3.71426	1956,2260,2322,3643,120892	EGFR,FGFR1,FLT3,INSR,LRRK2	5/79
4_Member	GO Biological Processes	GO:0045860	positive regulation of protein kinase activity	-4.9247	-3.36473	1956,2260,2322,3643,3717,5747,120892	EGFR,FGFR1,FLT3,INSR,JAK2,PTK2,LRRK2	7/246
4_Member	GO Biological Processes	GO:0071902	positive regulation of protein serine/threonine kinase activity	-4.36476	-2.88844	1956,2260,2322,3643,120892	EGFR,FGFR1,FLT3,INSR,LRRK2	5/124
5_Summary	GO Biological Processes	GO:0048545	response to steroid hormone	-18.019	-14.8764	142,836,1956,2099,2322,2908,3480,3717,4193,4306,5241,5290,5467,5594,5724,5743,7298,8644,3767,240,1588,3643,7068,3791,1066,2263	PARP1,CASP3,EGFR,ESR1,FLT3,NR3C1,IGF1R,JAK2,MDM2,NR3C2,PGR,PIK3CA,PPARD,MAPK1,PTAFR,PTGS2,TYMS,AKR1C3,KCNJ11,ALOX5,CYP19A1,INSR,THRB,KDR,CES1,FGFR2	26/-
5_Member	GO Biological Processes	GO:0048545	response to steroid hormone	-18.019	-14.8764	142,836,1956,2099,2322,2908,3480,3717,4193,4306,5241,5290,5467,5594,5724,5743,7298,8644	PARP1,CASP3,EGFR,ESR1,FLT3,NR3C1,IGF1R,JAK2,MDM2,NR3C2,PGR,PIK3CA,PPARD,MAPK1,PTAFR,PTGS2,TYMS,AKR1C3	18/286
5_Member	GO Biological Processes	GO:0031960	response to corticosteroid	-13.0645	-10.4167	142,836,1956,2322,2908,3480,3717,5290,5724,5743,7298,8644	PARP1,CASP3,EGFR,FLT3,NR3C1,IGF1R,JAK2,PIK3CA,PTAFR,PTGS2,TYMS,AKR1C3	12/158
5_Member	GO Biological Processes	GO:0071383	cellular response to steroid hormone stimulus	-11.714	-9.19332	1956,2099,2322,2908,3480,3717,4306,5241,5467,5594,8644	EGFR,ESR1,FLT3,NR3C1,IGF1R,JAK2,NR3C2,PGR,PPARD,MAPK1,AKR1C3	11/154
5_Member	GO Biological Processes	GO:0051384	response to glucocorticoid	-10.8127	-8.45272	836,1956,2322,2908,3480,3717,5290,5724,5743,7298	CASP3,EGFR,FLT3,NR3C1,IGF1R,JAK2,PIK3CA,PTAFR,PTGS2,TYMS	10/136
5_Member	GO Biological Processes	GO:1901654	response to ketone	-8.77801	-6.71004	142,1956,2908,3480,3717,3767,5290,5724,7298,8644	PARP1,EGFR,NR3C1,IGF1R,JAK2,KCNJ11,PIK3CA,PTAFR,TYMS,AKR1C3	10/219
5_Member	GO Biological Processes	GO:0071548	response to dexamethasone	-8.25481	-6.27544	1956,2908,3480,3717,5290,5724	EGFR,NR3C1,IGF1R,JAK2,PIK3CA,PTAFR	6/45
5_Member	KEGG Pathway	hsa04913	Ovarian steroidogenesis	-7.91668	-5.99321	240,1588,3480,3643,5743,8644	ALOX5,CYP19A1,IGF1R,INSR,PTGS2,AKR1C3	6/51
5_Member	GO Biological Processes	GO:0071384	cellular response to corticosteroid stimulus	-7.27033	-5.43549	1956,2322,2908,3480,3717,8644	EGFR,FLT3,NR3C1,IGF1R,JAK2,AKR1C3	6/65
5_Member	GO Biological Processes	GO:0071385	cellular response to glucocorticoid stimulus	-6.10272	-4.40533	1956,2322,2908,3480,3717	EGFR,FLT3,NR3C1,IGF1R,JAK2	5/55
5_Member	GO Biological Processes	GO:0071549	cellular response to dexamethasone stimulus	-5.77689	-4.11859	1956,2908,3480,3717	EGFR,NR3C1,IGF1R,JAK2	4/28
5_Member	GO Molecular Functions	GO:0042562	hormone binding	-4.9916	-3.42375	1956,2908,3480,3643,7068	EGFR,NR3C1,IGF1R,INSR,THRB	5/92
5_Member	GO Biological Processes	GO:0038083	peptidyl-tyrosine autophosphorylation	-4.99013	-3.423	1956,3480,3791	EGFR,IGF1R,KDR	3/14
5_Member	GO Biological Processes	GO:1901655	cellular response to ketone	-4.67268	-3.14407	1956,2908,3480,3717,8644	EGFR,NR3C1,IGF1R,JAK2,AKR1C3	5/107
5_Member	GO Biological Processes	GO:0050810	regulation of steroid biosynthetic process	-3.92153	-2.50115	1066,2908,3480,8644	CES1,NR3C1,IGF1R,AKR1C3	4/81
5_Member	GO Biological Processes	GO:0032350	regulation of hormone metabolic process	-3.61472	-2.24065	2908,3480,8644	NR3C1,IGF1R,AKR1C3	3/39
5_Member	GO Biological Processes	GO:0046890	regulation of lipid biosynthetic process	-3.5165	-2.15565	1066,2908,3480,5743,8644	CES1,NR3C1,IGF1R,PTGS2,AKR1C3	5/188
5_Member	GO Biological Processes	GO:0019218	regulation of steroid metabolic process	-3.50362	-2.14475	1066,2908,3480,8644	CES1,NR3C1,IGF1R,AKR1C3	4/104
5_Member	GO Biological Processes	GO:0097306	cellular response to alcohol	-3.47209	-2.11615	1066,3480,4193,8644	CES1,IGF1R,MDM2,AKR1C3	4/106
5_Member	KEGG Pathway	hsa04144	Endocytosis	-2.10188	-0.884527	1956,2263,3480,4193	EGFR,FGFR2,IGF1R,MDM2	4/252
6_Summary	KEGG Pathway	hsa05417	Lipid and atherosclerosis	-17.1551	-14.0872	834,836,839,840,841,1432,2932,3717,4312,4780,5290,5468,5594,5599,5602,5747,3716,5743,7297,240,142,4170,4193,2099,3643,891,983,1111,3718,1956,2052,8644,5663,5664,7421,3767,846,3480,3791,5836,7137,1017,239,120892,10846,5467,6790,2915	CASP1,CASP3,CASP6,CASP7,CASP8,MAPK14,GSK3B,JAK2,MMP1,NFE2L2,PIK3CA,PPARG,MAPK1,MAPK8,MAPK10,PTK2,JAK1,PTGS2,TYK2,ALOX5,PARP1,MCL1,MDM2,ESR1,INSR,CCNB1,CDK1,CHEK1,JAK3,EGFR,EPHX1,AKR1C3,PSEN1,PSEN2,VDR,KCNJ11,CASR,IGF1R,KDR,PYGL,TNNI3,CDK2,ALOX12,LRRK2,PDE10A,PPARD,AURKA,GRM5	48/-
6_Member	KEGG Pathway	hsa05417	Lipid and atherosclerosis	-17.1551	-14.0872	834,836,839,840,841,1432,2932,3717,4312,4780,5290,5468,5594,5599,5602,5747	CASP1,CASP3,CASP6,CASP7,CASP8,MAPK14,GSK3B,JAK2,MMP1,NFE2L2,PIK3CA,PPARG,MAPK1,MAPK8,MAPK10,PTK2	16/216
6_Member	KEGG Pathway	hsa05167	Kaposi sarcoma-associated herpesvirus infection	-11.9458	-9.40528	836,841,1432,2932,3716,3717,5290,5594,5599,5602,5743,7297	CASP3,CASP8,MAPK14,GSK3B,JAK1,JAK2,PIK3CA,MAPK1,MAPK8,MAPK10,PTGS2,TYK2	12/196
6_Member	KEGG Pathway	hsa05145	Toxoplasmosis	-11.7016	-9.18736	240,836,841,1432,3716,3717,5594,5599,5602,7297	ALOX5,CASP3,CASP8,MAPK14,JAK1,JAK2,MAPK1,MAPK8,MAPK10,TYK2	10/111
6_Member	KEGG Pathway	hsa04210	Apoptosis	-10.8127	-8.45272	142,836,839,840,841,4170,5290,5594,5599,5602	PARP1,CASP3,CASP6,CASP7,CASP8,MCL1,PIK3CA,MAPK1,MAPK8,MAPK10	10/136
6_Member	KEGG Pathway	hsa04657	IL-17 signaling pathway	-10.775	-8.42389	836,841,1432,2932,4312,5594,5599,5602,5743	CASP3,CASP8,MAPK14,GSK3B,MMP1,MAPK1,MAPK8,MAPK10,PTGS2	9/95
6_Member	KEGG Pathway	hsa04625	C-type lectin receptor signaling pathway	-10.3781	-8.11419	834,841,1432,4193,5290,5594,5599,5602,5743	CASP1,CASP8,MAPK14,MDM2,PIK3CA,MAPK1,MAPK8,MAPK10,PTGS2	9/105
6_Member	KEGG Pathway	hsa04917	Prolactin signaling pathway	-10.2454	-8.00252	1432,2099,2932,3717,5290,5594,5599,5602	MAPK14,ESR1,GSK3B,JAK2,PIK3CA,MAPK1,MAPK8,MAPK10	8/71
6_Member	KEGG Pathway	hsa04932	Non-alcoholic fatty liver disease	-10.192	-7.96583	836,840,841,1432,2932,3643,5290,5468,5599,5602	CASP3,CASP7,CASP8,MAPK14,GSK3B,INSR,PIK3CA,PPARG,MAPK8,MAPK10	10/157
6_Member	KEGG Pathway	hsa05170	Human immunodeficiency virus 1 infection	-10.1843	-7.96142	836,841,891,983,1111,1432,5290,5594,5599,5602,5747	CASP3,CASP8,CCNB1,CDK1,CHEK1,MAPK14,PIK3CA,MAPK1,MAPK8,MAPK10,PTK2	11/213
6_Member	KEGG Pathway	hsa04668	TNF signaling pathway	-9.88581	-7.70046	836,840,841,1432,5290,5594,5599,5602,5743	CASP3,CASP7,CASP8,MAPK14,PIK3CA,MAPK1,MAPK8,MAPK10,PTGS2	9/119
6_Member	KEGG Pathway	hsa04658	Th1 and Th2 cell differentiation	-9.3265	-7.17843	1432,3716,3717,3718,5594,5599,5602,7297	MAPK14,JAK1,JAK2,JAK3,MAPK1,MAPK8,MAPK10,TYK2	8/92
6_Member	KEGG Pathway	hsa04659	Th17 cell differentiation	-8.76632	-6.70364	1432,3716,3717,3718,5594,5599,5602,7297	MAPK14,JAK1,JAK2,JAK3,MAPK1,MAPK8,MAPK10,TYK2	8/108
6_Member	KEGG Pathway	hsa04620	Toll-like receptor signaling pathway	-8.73431	-6.68425	841,1432,3716,5290,5594,5599,5602,7297	CASP8,MAPK14,JAK1,PIK3CA,MAPK1,MAPK8,MAPK10,TYK2	8/109
6_Member	KEGG Pathway	hsa05208	Chemical carcinogenesis - reactive oxygen species	-8.6462	-6.60856	1432,1956,2052,4780,5290,5594,5599,5602,5747,8644	MAPK14,EGFR,EPHX1,NFE2L2,PIK3CA,MAPK1,MAPK8,MAPK10,PTK2,AKR1C3	10/226
6_Member	KEGG Pathway	hsa05171	Coronavirus disease - COVID-19	-8.4302	-6.41185	834,1432,1956,3716,4312,5290,5594,5599,5602,7297	CASP1,MAPK14,EGFR,JAK1,MMP1,PIK3CA,MAPK1,MAPK8,MAPK10,TYK2	10/238
6_Member	KEGG Pathway	hsa04722	Neurotrophin signaling pathway	-8.40163	-6.39136	1432,2932,5290,5594,5599,5602,5663,5664	MAPK14,GSK3B,PIK3CA,MAPK1,MAPK8,MAPK10,PSEN1,PSEN2	8/120
6_Member	KEGG Pathway	hsa04935	Growth hormone synthesis, secretion and action	-8.34466	-6.34624	1432,2932,3717,5290,5594,5599,5602,5747	MAPK14,GSK3B,JAK2,PIK3CA,MAPK1,MAPK8,MAPK10,PTK2	8/122
6_Member	KEGG Pathway	hsa05133	Pertussis	-8.3165	-6.32195	834,836,840,1432,5594,5599,5602	CASP1,CASP3,CASP7,MAPK14,MAPK1,MAPK8,MAPK10	7/78
6_Member	KEGG Pathway	hsa05152	Tuberculosis	-8.28886	-6.30007	836,841,1432,3716,3717,5594,5599,5602,7421	CASP3,CASP8,MAPK14,JAK1,JAK2,MAPK1,MAPK8,MAPK10,VDR	9/180
6_Member	KEGG Pathway	hsa05131	Shigellosis	-8.24232	-6.26666	834,1432,1956,2932,4193,5290,5594,5599,5602,5747	CASP1,MAPK14,EGFR,GSK3B,MDM2,PIK3CA,MAPK1,MAPK8,MAPK10,PTK2	10/249
6_Member	KEGG Pathway	hsa04930	Type II diabetes mellitus	-8.13696	-6.17762	3643,3767,5290,5594,5599,5602	INSR,KCNJ11,PIK3CA,MAPK1,MAPK8,MAPK10	6/47
6_Member	KEGG Pathway	hsa04621	NOD-like receptor signaling pathway	-8.10376	-6.14799	834,841,846,1432,3716,5594,5599,5602,7297	CASP1,CASP8,CASR,MAPK14,JAK1,MAPK1,MAPK8,MAPK10,TYK2	9/189
6_Member	KEGG Pathway	hsa04012	ErbB signaling pathway	-8.0169	-6.07649	1956,2932,5290,5594,5599,5602,5747	EGFR,GSK3B,PIK3CA,MAPK1,MAPK8,MAPK10,PTK2	7/86
6_Member	KEGG Pathway	hsa05210	Colorectal cancer	-7.98156	-6.04814	836,1956,2932,5290,5594,5599,5602	CASP3,EGFR,GSK3B,PIK3CA,MAPK1,MAPK8,MAPK10	7/87
6_Member	KEGG Pathway	hsa05135	Yersinia infection	-7.92201	-5.99689	834,1432,2932,5290,5594,5599,5602,5747	CASP1,MAPK14,GSK3B,PIK3CA,MAPK1,MAPK8,MAPK10,PTK2	8/138
6_Member	KEGG Pathway	hsa04510	Focal adhesion	-7.83394	-5.92019	1956,2932,3480,3791,5290,5594,5599,5602,5747	EGFR,GSK3B,IGF1R,KDR,PIK3CA,MAPK1,MAPK8,MAPK10,PTK2	9/203
6_Member	KEGG Pathway	hsa04380	Osteoclast differentiation	-7.82455	-5.91239	1432,3716,5290,5468,5594,5599,5602,7297	MAPK14,JAK1,PIK3CA,PPARG,MAPK1,MAPK8,MAPK10,TYK2	8/142
6_Member	KEGG Pathway	hsa04933	AGE-RAGE signaling pathway in diabetic complications	-7.52797	-5.6601	836,1432,3717,5290,5594,5599,5602	CASP3,MAPK14,JAK2,PIK3CA,MAPK1,MAPK8,MAPK10	7/101
6_Member	KEGG Pathway	hsa04215	Apoptosis - multiple species	-7.31572	-5.47415	836,840,841,5599,5602	CASP3,CASP7,CASP8,MAPK8,MAPK10	5/32
6_Member	KEGG Pathway	hsa04664	Fc epsilon RI signaling pathway	-7.11289	-5.30146	240,1432,5290,5594,5599,5602	ALOX5,MAPK14,PIK3CA,MAPK1,MAPK8,MAPK10	6/69
6_Member	KEGG Pathway	hsa05132	Salmonella infection	-7.04192	-5.23802	834,836,840,841,1432,5290,5594,5599,5602	CASP1,CASP3,CASP7,CASP8,MAPK14,PIK3CA,MAPK1,MAPK8,MAPK10	9/251
6_Member	KEGG Pathway	hsa05212	Pancreatic cancer	-6.82534	-5.04916	1956,3716,5290,5594,5599,5602	EGFR,JAK1,PIK3CA,MAPK1,MAPK8,MAPK10	6/77
6_Member	GO Molecular Functions	GO:0004707	MAP kinase activity	-6.81567	-5.04066	1432,5594,5599,5602	MAPK14,MAPK1,MAPK8,MAPK10	4/16
6_Member	KEGG Pathway	hsa04926	Relaxin signaling pathway	-6.77128	-5.0009	1432,1956,4312,5290,5594,5599,5602	MAPK14,EGFR,MMP1,PIK3CA,MAPK1,MAPK8,MAPK10	7/130
6_Member	KEGG Pathway	hsa05130	Pathogenic Escherichia coli infection	-6.62317	-4.86974	834,836,840,841,1432,5594,5599,5602	CASP1,CASP3,CASP7,CASP8,MAPK14,MAPK1,MAPK8,MAPK10	8/203
6_Member	KEGG Pathway	hsa04910	Insulin signaling pathway	-6.59425	-4.84412	2932,3643,5290,5594,5599,5602,5836	GSK3B,INSR,PIK3CA,MAPK1,MAPK8,MAPK10,PYGL	7/138
6_Member	KEGG Pathway	hsa05415	Diabetic cardiomyopathy	-6.5907	-4.84167	142,1432,2932,3643,5290,5599,5602,7137	PARP1,MAPK14,GSK3B,INSR,PIK3CA,MAPK8,MAPK10,TNNI3	8/205
6_Member	KEGG Pathway	hsa05418	Fluid shear stress and atherosclerosis	-6.53068	-4.79249	1432,3791,4780,5290,5599,5602,5747	MAPK14,KDR,NFE2L2,PIK3CA,MAPK8,MAPK10,PTK2	7/141
6_Member	KEGG Pathway	hsa05142	Chagas disease	-6.07303	-4.37759	841,1432,5290,5594,5599,5602	CASP8,MAPK14,PIK3CA,MAPK1,MAPK8,MAPK10	6/103
6_Member	KEGG Pathway	hsa04931	Insulin resistance	-5.92836	-4.25558	2932,3643,5290,5599,5602,5836	GSK3B,INSR,PIK3CA,MAPK8,MAPK10,PYGL	6/109
6_Member	GO Biological Processes	GO:0090398	cellular senescence	-5.77148	-4.11406	1017,1432,3480,5599,5602	CDK2,MAPK14,IGF1R,MAPK8,MAPK10	5/64
6_Member	KEGG Pathway	hsa04660	T cell receptor signaling pathway	-5.6422	-3.99791	1432,2932,5290,5594,5599,5602	MAPK14,GSK3B,PIK3CA,MAPK1,MAPK8,MAPK10	6/122
6_Member	KEGG Pathway	hsa05120	Epithelial cell signaling in Helicobacter pylori infection	-5.5465	-3.91578	836,1432,1956,5599,5602	CASP3,MAPK14,EGFR,MAPK8,MAPK10	5/71
6_Member	KEGG Pathway	hsa04936	Alcoholic liver disease	-5.22551	-3.63237	836,841,1432,2932,5599,5602	CASP3,CASP8,MAPK14,GSK3B,MAPK8,MAPK10	6/144
6_Member	KEGG Pathway	hsa04912	GnRH signaling pathway	-4.96866	-3.40727	1432,1956,5594,5599,5602	MAPK14,EGFR,MAPK1,MAPK8,MAPK10	5/93
6_Member	KEGG Pathway	hsa04750	Inflammatory mediator regulation of TRP channels	-4.83633	-3.28618	239,1432,5290,5599,5602	ALOX12,MAPK14,PIK3CA,MAPK8,MAPK10	5/99
6_Member	KEGG Pathway	hsa05231	Choline metabolism in cancer	-4.83633	-3.28618	1956,5290,5594,5599,5602	EGFR,PIK3CA,MAPK1,MAPK8,MAPK10	5/99
6_Member	KEGG Pathway	hsa05020	Prion disease	-4.5834	-3.06823	836,1432,2932,5290,5594,5599,5602	CASP3,MAPK14,GSK3B,PIK3CA,MAPK1,MAPK8,MAPK10	7/278
6_Member	GO Biological Processes	GO:0007254	JNK cascade	-4.49135	-2.99649	846,5599,5602,120892	CASR,MAPK8,MAPK10,LRRK2	4/58
6_Member	KEGG Pathway	hsa04071	Sphingolipid signaling pathway	-4.39855	-2.91514	1432,5290,5594,5599,5602	MAPK14,PIK3CA,MAPK1,MAPK8,MAPK10	5/122
6_Member	GO Biological Processes	GO:0051403	stress-activated MAPK cascade	-4.25478	-2.78944	1432,5594,5599	MAPK14,MAPK1,MAPK8	3/24
6_Member	KEGG Pathway	hsa04024	cAMP signaling pathway	-4.12253	-2.67508	5290,5594,5599,5602,7137,10846	PIK3CA,MAPK1,MAPK8,MAPK10,TNNI3,PDE10A	6/226
6_Member	KEGG Pathway	hsa04622	RIG-I-like receptor signaling pathway	-4.12105	-2.67414	841,1432,5599,5602	CASP8,MAPK14,MAPK8,MAPK10	4/72
6_Member	GO Biological Processes	GO:0031098	stress-activated protein kinase signaling cascade	-4.09779	-2.65613	1432,5594,5599	MAPK14,MAPK1,MAPK8	3/27
6_Member	GO Biological Processes	GO:0097009	energy homeostasis	-3.88041	-2.46616	1432,5290,5467,5599	MAPK14,PIK3CA,PPARD,MAPK8	4/83
6_Member	GO Molecular Functions	GO:0004712	protein serine/threonine/tyrosine kinase activity	-3.48816	-2.12999	1432,5602,6790	MAPK14,MAPK10,AURKA	3/43
6_Member	KEGG Pathway	hsa05016	Huntington disease	-3.37389	-2.0328	836,841,2915,5468,5599,5602	CASP3,CASP8,GRM5,PPARG,MAPK8,MAPK10	6/311
6_Member	GO Biological Processes	GO:0038093	Fc receptor signaling pathway	-3.14936	-1.83324	5599,5602,5747	MAPK8,MAPK10,PTK2	3/56
6_Member	KEGG Pathway	hsa04728	Dopaminergic synapse	-3.11268	-1.79978	1432,2932,5599,5602	MAPK14,GSK3B,MAPK8,MAPK10	4/132
6_Member	KEGG Pathway	hsa04920	Adipocytokine signaling pathway	-2.86744	-1.57762	3717,5599,5602	JAK2,MAPK8,MAPK10	3/70
6_Member	KEGG Pathway	hsa05012	Parkinson disease	-2.80259	-1.51845	836,4780,5599,5602,120892	CASP3,NFE2L2,MAPK8,MAPK10,LRRK2	5/271
7_Summary	GO Biological Processes	GO:0042391	regulation of membrane potential	-16.7894	-13.7437	142,1020,1268,2554,2555,2556,2558,2562,2566,2915,2932,3741,3753,3767,3784,3791,4544,5663,10060,120892,1432,5594,5599,5602,5743,2908,3164,8851,11255,1956,2260,2263,2322,3480,3643,3717,4306,5468,7297,7421,5724,7068,5747,846,6790,4170,10846,841,5290,762	PARP1,CDK5,CNR1,GABRA1,GABRA2,GABRA3,GABRA5,GABRB3,GABRG2,GRM5,GSK3B,KCNA5,KCNE1,KCNJ11,KCNQ1,KDR,MTNR1B,PSEN1,ABCC9,LRRK2,MAPK14,MAPK1,MAPK8,MAPK10,PTGS2,NR3C1,NR4A1,CDK5R1,HRH3,EGFR,FGFR1,FGFR2,FLT3,IGF1R,INSR,JAK2,NR3C2,PPARG,TYK2,VDR,PTAFR,THRB,PTK2,CASR,AURKA,MCL1,PDE10A,CASP8,PIK3CA,CA4	50/-
7_Member	GO Biological Processes	GO:0042391	regulation of membrane potential	-16.7894	-13.7437	142,1020,1268,2554,2555,2556,2558,2562,2566,2915,2932,3741,3753,3767,3784,3791,4544,5663,10060,120892	PARP1,CDK5,CNR1,GABRA1,GABRA2,GABRA3,GABRA5,GABRB3,GABRG2,GRM5,GSK3B,KCNA5,KCNE1,KCNJ11,KCNQ1,KDR,MTNR1B,PSEN1,ABCC9,LRRK2	20/465
7_Member	KEGG Pathway	hsa04723	Retrograde endocannabinoid signaling	-14.9151	-12.0155	1268,1432,2554,2555,2556,2558,2562,2566,2915,5594,5599,5602,5743	CNR1,MAPK14,GABRA1,GABRA2,GABRA3,GABRA5,GABRB3,GABRG2,GRM5,MAPK1,MAPK8,MAPK10,PTGS2	13/149
7_Member	GO Biological Processes	GO:0099536	synaptic signaling	-14.3943	-11.6038	1020,1268,2554,2555,2556,2558,2562,2566,2908,2915,2932,3164,4544,5594,5663,8851,11255,120892	CDK5,CNR1,GABRA1,GABRA2,GABRA3,GABRA5,GABRB3,GABRG2,NR3C1,GRM5,GSK3B,NR4A1,MTNR1B,MAPK1,PSEN1,CDK5R1,HRH3,LRRK2	18/460
7_Member	GO Biological Processes	GO:0099537	trans-synaptic signaling	-13.6548	-10.9313	1020,1268,2554,2555,2556,2558,2562,2566,2908,2915,2932,3164,4544,5594,5663,11255,120892	CDK5,CNR1,GABRA1,GABRA2,GABRA3,GABRA5,GABRB3,GABRG2,NR3C1,GRM5,GSK3B,NR4A1,MTNR1B,MAPK1,PSEN1,HRH3,LRRK2	17/431
7_Member	GO Cellular Components	GO:0043235	receptor complex	-13.1616	-10.4961	1956,2260,2263,2322,2554,2555,2556,2558,2562,2566,3480,3643,3717,3791,4306,5468,7297,7421	EGFR,FGFR1,FGFR2,FLT3,GABRA1,GABRA2,GABRA3,GABRA5,GABRB3,GABRG2,IGF1R,INSR,JAK2,KDR,NR3C2,PPARG,TYK2,VDR	18/543
7_Member	GO Biological Processes	GO:0007268	chemical synaptic transmission	-12.7245	-10.1101	1020,2554,2555,2556,2558,2562,2566,2908,2915,2932,3164,4544,5594,5663,11255,120892	CDK5,GABRA1,GABRA2,GABRA3,GABRA5,GABRB3,GABRG2,NR3C1,GRM5,GSK3B,NR4A1,MTNR1B,MAPK1,PSEN1,HRH3,LRRK2	16/414
7_Member	GO Biological Processes	GO:0098916	anterograde trans-synaptic signaling	-12.7245	-10.1101	1020,2554,2555,2556,2558,2562,2566,2908,2915,2932,3164,4544,5594,5663,11255,120892	CDK5,GABRA1,GABRA2,GABRA3,GABRA5,GABRB3,GABRG2,NR3C1,GRM5,GSK3B,NR4A1,MTNR1B,MAPK1,PSEN1,HRH3,LRRK2	16/414
7_Member	GO Molecular Functions	GO:0022851	GABA-gated chloride ion channel activity	-10.8679	-8.48961	2554,2555,2556,2558,2562,2566	GABRA1,GABRA2,GABRA3,GABRA5,GABRB3,GABRG2	6/18
7_Member	GO Molecular Functions	GO:0004890	GABA-A receptor activity	-10.7041	-8.366	2554,2555,2556,2558,2562,2566	GABRA1,GABRA2,GABRA3,GABRA5,GABRB3,GABRG2	6/19
7_Member	GO Cellular Components	GO:1902711	GABA-A receptor complex	-10.7041	-8.366	2554,2555,2556,2558,2562,2566	GABRA1,GABRA2,GABRA3,GABRA5,GABRB3,GABRG2	6/19
7_Member	GO Cellular Components	GO:1902710	GABA receptor complex	-10.4053	-8.12672	2554,2555,2556,2558,2562,2566	GABRA1,GABRA2,GABRA3,GABRA5,GABRB3,GABRG2	6/21
7_Member	GO Biological Processes	GO:0060078	regulation of postsynaptic membrane potential	-10.3036	-8.05033	1020,2554,2555,2556,2558,2566,2915,2932,120892	CDK5,GABRA1,GABRA2,GABRA3,GABRA5,GABRG2,GRM5,GSK3B,LRRK2	9/107
7_Member	GO Molecular Functions	GO:0016917	GABA receptor activity	-10.268	-8.02168	2554,2555,2556,2558,2562,2566	GABRA1,GABRA2,GABRA3,GABRA5,GABRB3,GABRG2	6/22
7_Member	GO Biological Processes	GO:1904862	inhibitory synapse assembly	-10.1378	-7.92118	2554,2555,2556,2558,2562,2566	GABRA1,GABRA2,GABRA3,GABRA5,GABRB3,GABRG2	6/23
7_Member	GO Molecular Functions	GO:0008503	benzodiazepine receptor activity	-9.93277	-7.73527	2554,2555,2556,2558,2566	GABRA1,GABRA2,GABRA3,GABRA5,GABRG2	5/11
7_Member	KEGG Pathway	hsa04080	Neuroactive ligand-receptor interaction	-9.90681	-7.71844	1268,2554,2555,2556,2558,2562,2566,2908,2915,4544,5724,7068,11255	CNR1,GABRA1,GABRA2,GABRA3,GABRA5,GABRB3,GABRG2,NR3C1,GRM5,MTNR1B,PTAFR,THRB,HRH3	13/368
7_Member	GO Biological Processes	GO:0051932	synaptic transmission, GABAergic	-9.57129	-7.40641	2554,2555,2556,2558,2562,2566	GABRA1,GABRA2,GABRA3,GABRA5,GABRB3,GABRG2	6/28
7_Member	GO Biological Processes	GO:0007214	gamma-aminobutyric acid signaling pathway	-9.4717	-7.30967	2554,2555,2556,2558,2562,2566	GABRA1,GABRA2,GABRA3,GABRA5,GABRB3,GABRG2	6/29
7_Member	GO Biological Processes	GO:0050808	synapse organization	-9.21181	-7.07727	1020,2554,2555,2556,2558,2562,2566,2915,3480,3643,5663,120892	CDK5,GABRA1,GABRA2,GABRA3,GABRA5,GABRB3,GABRG2,GRM5,IGF1R,INSR,PSEN1,LRRK2	12/337
7_Member	GO Molecular Functions	GO:0030594	neurotransmitter receptor activity	-9.14091	-7.0143	2554,2555,2556,2558,2562,2566,2915,11255	GABRA1,GABRA2,GABRA3,GABRA5,GABRB3,GABRG2,GRM5,HRH3	8/97
7_Member	GO Cellular Components	GO:0032589	neuron projection membrane	-9.13196	-7.01055	2554,2555,2556,2558,2566,3643,3767	GABRA1,GABRA2,GABRA3,GABRA5,GABRG2,INSR,KCNJ11	7/60
7_Member	GO Cellular Components	GO:0030425	dendrite	-9.06615	-6.95577	1020,2554,2555,2556,2558,2566,2915,2932,3643,5599,5663,5747,8851,11255,120892	CDK5,GABRA1,GABRA2,GABRA3,GABRA5,GABRG2,GRM5,GSK3B,INSR,MAPK8,PSEN1,PTK2,CDK5R1,HRH3,LRRK2	15/623
7_Member	GO Cellular Components	GO:0097447	dendritic tree	-9.04718	-6.94126	1020,2554,2555,2556,2558,2566,2915,2932,3643,5599,5663,5747,8851,11255,120892	CDK5,GABRA1,GABRA2,GABRA3,GABRA5,GABRG2,GRM5,GSK3B,INSR,MAPK8,PSEN1,PTK2,CDK5R1,HRH3,LRRK2	15/625
7_Member	GO Biological Processes	GO:0015698	inorganic anion transport	-8.78677	-6.71492	846,2554,2555,2556,2558,2562,2566,3784,7421	CASR,GABRA1,GABRA2,GABRA3,GABRA5,GABRB3,GABRG2,KCNQ1,VDR	9/158
7_Member	GO Biological Processes	GO:0006820	monoatomic anion transport	-8.73852	-6.68626	846,2554,2555,2556,2558,2562,2566,3784,10060	CASR,GABRA1,GABRA2,GABRA3,GABRA5,GABRB3,GABRG2,KCNQ1,ABCC9	9/160
7_Member	GO Cellular Components	GO:0098794	postsynapse	-8.72595	-6.67808	1020,2554,2555,2556,2558,2562,2566,2915,2932,3717,5663,5747,6790,8851,120892	CDK5,GABRA1,GABRA2,GABRA3,GABRA5,GABRB3,GABRG2,GRM5,GSK3B,JAK2,PSEN1,PTK2,AURKA,CDK5R1,LRRK2	15/660
7_Member	GO Cellular Components	GO:0032590	dendrite membrane	-8.57615	-6.54118	2554,2555,2556,2558,2566,3643	GABRA1,GABRA2,GABRA3,GABRA5,GABRG2,INSR	6/40
7_Member	KEGG Pathway	hsa05033	Nicotine addiction	-8.50852	-6.47986	2554,2555,2556,2558,2562,2566	GABRA1,GABRA2,GABRA3,GABRA5,GABRB3,GABRG2	6/41
7_Member	GO Molecular Functions	GO:0022836	gated channel activity	-8.34659	-6.34624	2554,2555,2556,2558,2562,2566,3741,3753,3767,3784,10060	GABRA1,GABRA2,GABRA3,GABRA5,GABRB3,GABRG2,KCNA5,KCNE1,KCNJ11,KCNQ1,ABCC9	11/318
7_Member	GO Molecular Functions	GO:0015267	channel activity	-8.27418	-6.28919	2554,2555,2556,2558,2562,2566,3741,3753,3767,3784,4170,5663,10060	GABRA1,GABRA2,GABRA3,GABRA5,GABRB3,GABRG2,KCNA5,KCNE1,KCNJ11,KCNQ1,MCL1,PSEN1,ABCC9	13/502
7_Member	GO Molecular Functions	GO:0022803	passive transmembrane transporter activity	-8.2639	-6.28121	2554,2555,2556,2558,2562,2566,3741,3753,3767,3784,4170,5663,10060	GABRA1,GABRA2,GABRA3,GABRA5,GABRB3,GABRG2,KCNA5,KCNE1,KCNJ11,KCNQ1,MCL1,PSEN1,ABCC9	13/503
7_Member	GO Biological Processes	GO:0098661	inorganic anion transmembrane transport	-8.15285	-6.18815	846,2554,2555,2556,2558,2562,2566,7421	CASR,GABRA1,GABRA2,GABRA3,GABRA5,GABRB3,GABRG2,VDR	8/129
7_Member	GO Molecular Functions	GO:0099095	ligand-gated monoatomic anion channel activity	-8.13696	-6.17762	2554,2555,2556,2558,2562,2566	GABRA1,GABRA2,GABRA3,GABRA5,GABRB3,GABRG2	6/47
7_Member	GO Molecular Functions	GO:0005216	monoatomic ion channel activity	-7.90313	-5.98292	2554,2555,2556,2558,2562,2566,3741,3753,3767,3784,5663,10060	GABRA1,GABRA2,GABRA3,GABRA5,GABRB3,GABRG2,KCNA5,KCNE1,KCNJ11,KCNQ1,PSEN1,ABCC9	12/441
7_Member	KEGG Pathway	hsa05032	Morphine addiction	-7.84442	-5.92906	2554,2555,2556,2558,2562,2566,10846	GABRA1,GABRA2,GABRA3,GABRA5,GABRB3,GABRG2,PDE10A	7/91
7_Member	GO Biological Processes	GO:0098656	monoatomic anion transmembrane transport	-7.80064	-5.89008	846,2554,2555,2556,2558,2562,2566,10060	CASR,GABRA1,GABRA2,GABRA3,GABRA5,GABRB3,GABRG2,ABCC9	8/143
7_Member	GO Cellular Components	GO:0034702	monoatomic ion channel complex	-7.71751	-5.81949	2554,2555,2556,2558,2562,2566,3741,3753,3767,3784,10060	GABRA1,GABRA2,GABRA3,GABRA5,GABRB3,GABRG2,KCNA5,KCNE1,KCNJ11,KCNQ1,ABCC9	11/366
7_Member	GO Cellular Components	GO:0034707	chloride channel complex	-7.66612	-5.77879	2554,2555,2556,2558,2562,2566	GABRA1,GABRA2,GABRA3,GABRA5,GABRB3,GABRG2	6/56
7_Member	GO Molecular Functions	GO:0022824	transmitter-gated monoatomic ion channel activity	-7.35298	-5.50595	2554,2555,2556,2558,2562,2566	GABRA1,GABRA2,GABRA3,GABRA5,GABRB3,GABRG2	6/63
7_Member	GO Molecular Functions	GO:0022835	transmitter-gated channel activity	-7.35298	-5.50595	2554,2555,2556,2558,2562,2566	GABRA1,GABRA2,GABRA3,GABRA5,GABRB3,GABRG2	6/63
7_Member	GO Biological Processes	GO:1902476	chloride transmembrane transport	-7.29804	-5.45782	846,2554,2555,2556,2558,2562,2566	CASR,GABRA1,GABRA2,GABRA3,GABRA5,GABRB3,GABRG2	7/109
7_Member	GO Biological Processes	GO:0098660	inorganic ion transmembrane transport	-7.21571	-5.3875	846,2554,2555,2556,2558,2562,2566,3741,3753,3767,3784,5663,7421,10060	CASR,GABRA1,GABRA2,GABRA3,GABRA5,GABRB3,GABRG2,KCNA5,KCNE1,KCNJ11,KCNQ1,PSEN1,VDR,ABCC9	14/734
7_Member	GO Molecular Functions	GO:0098960	postsynaptic neurotransmitter receptor activity	-7.07505	-5.26614	2554,2555,2558,2566,2915,11255	GABRA1,GABRA2,GABRA5,GABRG2,GRM5,HRH3	6/70
7_Member	GO Cellular Components	GO:0031256	leading edge membrane	-7.04228	-5.23802	1956,2554,2555,2556,2558,2566,3643,3767	EGFR,GABRA1,GABRA2,GABRA3,GABRA5,GABRG2,INSR,KCNJ11	8/179
7_Member	GO Biological Processes	GO:0007416	synapse assembly	-7.03479	-5.23337	1020,2554,2555,2556,2558,2562,2566	CDK5,GABRA1,GABRA2,GABRA3,GABRA5,GABRB3,GABRG2	7/119
7_Member	GO Cellular Components	GO:0031252	cell leading edge	-7.02823	-5.22805	841,1020,1956,2554,2555,2556,2558,2566,3643,3767,5290	CASP8,CDK5,EGFR,GABRA1,GABRA2,GABRA3,GABRA5,GABRG2,INSR,KCNJ11,PIK3CA	11/428
7_Member	GO Biological Processes	GO:0006821	chloride transport	-7.00978	-5.21205	846,2554,2555,2556,2558,2562,2566	CASR,GABRA1,GABRA2,GABRA3,GABRA5,GABRB3,GABRG2	7/120
7_Member	GO Biological Processes	GO:0034330	cell junction organization	-7.0048	-5.20831	1020,2554,2555,2556,2558,2562,2566,2915,3480,3643,5663,120892	CDK5,GABRA1,GABRA2,GABRA3,GABRA5,GABRB3,GABRG2,GRM5,IGF1R,INSR,PSEN1,LRRK2	12/533
7_Member	GO Molecular Functions	GO:0005230	extracellular ligand-gated monoatomic ion channel activity	-6.96491	-5.17448	2554,2555,2556,2558,2562,2566	GABRA1,GABRA2,GABRA3,GABRA5,GABRB3,GABRG2	6/73
7_Member	GO Molecular Functions	GO:0015276	ligand-gated monoatomic ion channel activity	-6.93204	-5.14282	2554,2555,2556,2558,2562,2566,3767,10060	GABRA1,GABRA2,GABRA3,GABRA5,GABRB3,GABRG2,KCNJ11,ABCC9	8/185
7_Member	GO Molecular Functions	GO:0022834	ligand-gated channel activity	-6.91404	-5.12722	2554,2555,2556,2558,2562,2566,3767,10060	GABRA1,GABRA2,GABRA3,GABRA5,GABRB3,GABRG2,KCNJ11,ABCC9	8/186
7_Member	GO Molecular Functions	GO:0005254	chloride channel activity	-6.69331	-4.92979	2554,2555,2556,2558,2562,2566	GABRA1,GABRA2,GABRA3,GABRA5,GABRB3,GABRG2	6/81
7_Member	KEGG Pathway	hsa04727	GABAergic synapse	-6.44896	-4.71528	2554,2555,2556,2558,2562,2566	GABRA1,GABRA2,GABRA3,GABRA5,GABRB3,GABRG2	6/89
7_Member	GO Cellular Components	GO:1902495	transmembrane transporter complex	-6.28841	-4.57211	2554,2555,2556,2558,2562,2566,3741,3753,3767,3784,10060	GABRA1,GABRA2,GABRA3,GABRA5,GABRB3,GABRG2,KCNA5,KCNE1,KCNJ11,KCNQ1,ABCC9	11/508
7_Member	GO Molecular Functions	GO:0005253	monoatomic anion channel activity	-6.20065	-4.49342	2554,2555,2556,2558,2562,2566	GABRA1,GABRA2,GABRA3,GABRA5,GABRB3,GABRG2	6/98
7_Member	GO Molecular Functions	GO:0015103	inorganic anion transmembrane transporter activity	-6.08703	-4.39061	2554,2555,2556,2558,2562,2566,10060	GABRA1,GABRA2,GABRA3,GABRA5,GABRB3,GABRG2,ABCC9	7/164
7_Member	GO Cellular Components	GO:1990351	transporter complex	-6.06823	-4.37375	2554,2555,2556,2558,2562,2566,3741,3753,3767,3784,10060	GABRA1,GABRA2,GABRA3,GABRA5,GABRB3,GABRG2,KCNA5,KCNE1,KCNJ11,KCNQ1,ABCC9	11/535
7_Member	GO Cellular Components	GO:0099572	postsynaptic specialization	-5.81274	-4.14906	1020,2554,2555,2558,2562,2566,2915,6790,8851	CDK5,GABRA1,GABRA2,GABRA5,GABRB3,GABRG2,GRM5,AURKA,CDK5R1	9/352
7_Member	GO Cellular Components	GO:0031253	cell projection membrane	-5.78248	-4.12328	762,1956,2554,2555,2556,2558,2566,3643,3767	CA4,EGFR,GABRA1,GABRA2,GABRA3,GABRA5,GABRG2,INSR,KCNJ11	9/355
7_Member	GO Molecular Functions	GO:0015108	chloride transmembrane transporter activity	-5.70523	-4.05487	2554,2555,2556,2558,2562,2566	GABRA1,GABRA2,GABRA3,GABRA5,GABRB3,GABRG2	6/119
7_Member	GO Molecular Functions	GO:0015318	inorganic molecular entity transmembrane transporter activity	-5.5423	-3.91241	2554,2555,2556,2558,2562,2566,3741,3753,3767,3784,5663,10060	GABRA1,GABRA2,GABRA3,GABRA5,GABRB3,GABRG2,KCNA5,KCNE1,KCNJ11,KCNQ1,PSEN1,ABCC9	12/734
7_Member	GO Cellular Components	GO:0099634	postsynaptic specialization membrane	-5.48194	-3.85724	2554,2555,2558,2562,2566,2915	GABRA1,GABRA2,GABRA5,GABRB3,GABRG2,GRM5	6/130
7_Member	GO Molecular Functions	GO:0015075	monoatomic ion transmembrane transporter activity	-5.3591	-3.74877	2554,2555,2556,2558,2562,2566,3741,3753,3767,3784,5663,10060	GABRA1,GABRA2,GABRA3,GABRA5,GABRB3,GABRG2,KCNA5,KCNE1,KCNJ11,KCNQ1,PSEN1,ABCC9	12/765
7_Member	GO Cellular Components	GO:0098982	GABA-ergic synapse	-5.31669	-3.71426	1268,2554,2555,2558,2566	CNR1,GABRA1,GABRA2,GABRA5,GABRG2	5/79
7_Member	GO Molecular Functions	GO:0008509	monoatomic anion transmembrane transporter activity	-5.22551	-3.63237	2554,2555,2556,2558,2562,2566	GABRA1,GABRA2,GABRA3,GABRA5,GABRB3,GABRG2	6/144
7_Member	GO Molecular Functions	GO:1904315	transmitter-gated monoatomic ion channel activity involved in regulation of postsynaptic membrane potential	-4.64724	-3.12334	2554,2555,2558,2566	GABRA1,GABRA2,GABRA5,GABRG2	4/53
7_Member	GO Molecular Functions	GO:0099529	neurotransmitter receptor activity involved in regulation of postsynaptic membrane potential	-4.58308	-3.06823	2554,2555,2558,2566	GABRA1,GABRA2,GABRA5,GABRG2	4/55
7_Member	GO Cellular Components	GO:0045211	postsynaptic membrane	-4.56354	-3.05187	2554,2555,2556,2558,2562,2566,2915	GABRA1,GABRA2,GABRA3,GABRA5,GABRB3,GABRG2,GRM5	7/280
7_Member	GO Biological Processes	GO:0034329	cell junction assembly	-4.51459	-3.0142	1020,2554,2555,2556,2558,2562,2566	CDK5,GABRA1,GABRA2,GABRA3,GABRA5,GABRB3,GABRG2	7/285
7_Member	GO Biological Processes	GO:0099505	regulation of presynaptic membrane potential	-4.0031	-2.57441	2555,2558,3767	GABRA2,GABRA5,KCNJ11	3/29
7_Member	KEGG Pathway	hsa04742	Taste transduction	-3.82068	-2.41745	2554,2555,2556,2558	GABRA1,GABRA2,GABRA3,GABRA5	4/86
8_Summary	KEGG Pathway	hsa04914	Progesterone-mediated oocyte maturation	-16.6196	-13.5951	890,891,983,1017,1432,3480,5241,5290,5594,5599,5602,6790,8900,898,23476,2908	CCNA2,CCNB1,CDK1,CDK2,MAPK14,IGF1R,PGR,PIK3CA,MAPK1,MAPK8,MAPK10,AURKA,CCNA1,CCNE1,BRD4,NR3C1	16/-
8_Member	KEGG Pathway	hsa04914	Progesterone-mediated oocyte maturation	-16.6196	-13.5951	890,891,983,1017,1432,3480,5241,5290,5594,5599,5602,6790,8900	CCNA2,CCNB1,CDK1,CDK2,MAPK14,IGF1R,PGR,PIK3CA,MAPK1,MAPK8,MAPK10,AURKA,CCNA1	13/111
8_Member	KEGG Pathway	hsa04114	Oocyte meiosis	-9.28077	-7.13816	891,898,983,1017,1432,3480,5241,5594,6790	CCNB1,CCNE1,CDK1,CDK2,MAPK14,IGF1R,PGR,MAPK1,AURKA	9/139
8_Member	GO Molecular Functions	GO:0008353	RNA polymerase II CTD heptapeptide repeat kinase activity	-5.46814	-3.84569	983,5594,23476	CDK1,MAPK1,BRD4	3/10
8_Member	GO Molecular Functions	GO:0140994	RNA polymerase II CTD heptapeptide repeat modifying activity	-4.3118	-2.83898	983,5594,23476	CDK1,MAPK1,BRD4	3/23
8_Member	GO Biological Processes	GO:0010971	positive regulation of G2/M transition of mitotic cell cycle	-4.04955	-2.61611	891,983,23476	CCNB1,CDK1,BRD4	3/28
8_Member	GO Biological Processes	GO:1902751	positive regulation of cell cycle G2/M phase transition	-3.91509	-2.49676	891,983,23476	CCNB1,CDK1,BRD4	3/31
8_Member	GO Cellular Components	GO:0005819	spindle	-2.6311	-1.36175	891,983,1432,2908,5594,6790	CCNB1,CDK1,MAPK14,NR3C1,MAPK1,AURKA	6/434
8_Member	GO Biological Processes	GO:1902850	microtubule cytoskeleton organization involved in mitosis	-2.092	-0.875928	891,983,6790	CCNB1,CDK1,AURKA	3/132
9_Summary	KEGG Pathway	hsa05010	Alzheimer disease	-15.619	-12.6525	836,840,841,1020,2915,2932,3643,5290,5594,5599,5602,5663,5664,5743,8851,23385,51107,55851,846,1268,1956,2558,2566,2908,3784,7068,120892,1432,760,3717	CASP3,CASP7,CASP8,CDK5,GRM5,GSK3B,INSR,PIK3CA,MAPK1,MAPK8,MAPK10,PSEN1,PSEN2,PTGS2,CDK5R1,NCSTN,APH1A,PSENEN,CASR,CNR1,EGFR,GABRA5,GABRG2,NR3C1,KCNQ1,THRB,LRRK2,MAPK14,CA2,JAK2	30/-
9_Member	KEGG Pathway	hsa05010	Alzheimer disease	-15.619	-12.6525	836,840,841,1020,2915,2932,3643,5290,5594,5599,5602,5663,5664,5743,8851,23385,51107,55851	CASP3,CASP7,CASP8,CDK5,GRM5,GSK3B,INSR,PIK3CA,MAPK1,MAPK8,MAPK10,PSEN1,PSEN2,PTGS2,CDK5R1,NCSTN,APH1A,PSENEN	18/391
9_Member	GO Biological Processes	GO:0007610	behavior	-11.149	-8.73682	836,846,1020,1268,1956,2558,2566,2908,2915,3643,3784,5594,5663,5743,7068,23385,120892	CASP3,CASR,CDK5,CNR1,EGFR,GABRA5,GABRG2,NR3C1,GRM5,INSR,KCNQ1,MAPK1,PSEN1,PTGS2,THRB,NCSTN,LRRK2	17/618
9_Member	KEGG Pathway	hsa05022	Pathways of neurodegeneration - multiple diseases	-10.5955	-8.27766	836,840,841,1020,1432,2915,2932,5594,5599,5602,5663,5664,5743,8851,120892	CASP3,CASP7,CASP8,CDK5,MAPK14,GRM5,GSK3B,MAPK1,MAPK8,MAPK10,PSEN1,PSEN2,PTGS2,CDK5R1,LRRK2	15/483
9_Member	GO Biological Processes	GO:0007611	learning or memory	-8.97252	-6.87865	836,1020,1268,1956,2558,2915,3643,5594,5663,5743,23385	CASP3,CDK5,CNR1,EGFR,GABRA5,GRM5,INSR,MAPK1,PSEN1,PTGS2,NCSTN	11/277
9_Member	GO Biological Processes	GO:0051966	regulation of synaptic transmission, glutamatergic	-8.35624	-6.352	1020,1268,1956,2915,5663,5743,120892	CDK5,CNR1,EGFR,GRM5,PSEN1,PTGS2,LRRK2	7/77
9_Member	GO Biological Processes	GO:0050890	cognition	-8.3043	-6.31169	836,1020,1268,1956,2558,2915,3643,5594,5663,5743,23385	CASP3,CDK5,CNR1,EGFR,GABRA5,GRM5,INSR,MAPK1,PSEN1,PTGS2,NCSTN	11/321
9_Member	GO Biological Processes	GO:0050804	modulation of chemical synaptic transmission	-7.34338	-5.49771	760,1020,1268,1956,2915,2932,3717,5594,5663,5743,23385,120892	CA2,CDK5,CNR1,EGFR,GRM5,GSK3B,JAK2,MAPK1,PSEN1,PTGS2,NCSTN,LRRK2	12/496
9_Member	GO Biological Processes	GO:0099177	regulation of trans-synaptic signaling	-7.33385	-5.48956	760,1020,1268,1956,2915,2932,3717,5594,5663,5743,23385,120892	CA2,CDK5,CNR1,EGFR,GRM5,GSK3B,JAK2,MAPK1,PSEN1,PTGS2,NCSTN,LRRK2	12/497
9_Member	GO Biological Processes	GO:0048167	regulation of synaptic plasticity	-5.22757	-3.63237	1020,2915,2932,5594,5663,5743,23385	CDK5,GRM5,GSK3B,MAPK1,PSEN1,PTGS2,NCSTN	7/221
10_Summary	GO Biological Processes	GO:0010038	response to metal ion	-15.2011	-12.2693	142,836,841,846,983,1585,1956,4193,4780,5594,5599,5743,7015,7139,8644,23385,120892,1268,1432,3480,5467,5468,7298,7421,231,834,5290,3717,3741,5663,5742	PARP1,CASP3,CASP8,CASR,CDK1,CYP11B2,EGFR,MDM2,NFE2L2,MAPK1,MAPK8,PTGS2,TERT,TNNT2,AKR1C3,NCSTN,LRRK2,CNR1,MAPK14,IGF1R,PPARD,PPARG,TYMS,VDR,AKR1B1,CASP1,PIK3CA,JAK2,KCNA5,PSEN1,PTGS1	31/-
10_Member	GO Biological Processes	GO:0010038	response to metal ion	-15.2011	-12.2693	142,836,841,846,983,1585,1956,4193,4780,5594,5599,5743,7015,7139,8644,23385,120892	PARP1,CASP3,CASP8,CASR,CDK1,CYP11B2,EGFR,MDM2,NFE2L2,MAPK1,MAPK8,PTGS2,TERT,TNNT2,AKR1C3,NCSTN,LRRK2	17/347
10_Member	GO Biological Processes	GO:0031667	response to nutrient levels	-11.6141	-9.11866	846,1268,1432,1956,3480,4193,4780,5467,5468,5594,5599,5743,7298,7421,8644,120892	CASR,CNR1,MAPK14,EGFR,IGF1R,MDM2,NFE2L2,PPARD,PPARG,MAPK1,MAPK8,PTGS2,TYMS,VDR,AKR1C3,LRRK2	16/490
10_Member	GO Biological Processes	GO:0062197	cellular response to chemical stress	-11.3258	-8.87672	142,231,834,836,983,1956,4193,4780,5290,5594,5599,5743,120892	PARP1,AKR1B1,CASP1,CASP3,CDK1,EGFR,MDM2,NFE2L2,PIK3CA,MAPK1,MAPK8,PTGS2,LRRK2	13/283
10_Member	GO Biological Processes	GO:0006979	response to oxidative stress	-11.0723	-8.67494	142,836,983,1956,3717,3741,4193,4780,5594,5599,5663,5742,5743,120892	PARP1,CASP3,CDK1,EGFR,JAK2,KCNA5,MDM2,NFE2L2,MAPK1,MAPK8,PSEN1,PTGS1,PTGS2,LRRK2	14/368
10_Member	GO Biological Processes	GO:0071248	cellular response to metal ion	-9.42207	-7.26568	142,1585,1956,4780,5594,5599,5743,8644,23385,120892	PARP1,CYP11B2,EGFR,NFE2L2,MAPK1,MAPK8,PTGS2,AKR1C3,NCSTN,LRRK2	10/188
10_Member	GO Biological Processes	GO:0031669	cellular response to nutrient levels	-8.48308	-6.4565	846,3480,4193,4780,5467,5594,5599,7421,8644,120892	CASR,IGF1R,MDM2,NFE2L2,PPARD,MAPK1,MAPK8,VDR,AKR1C3,LRRK2	10/235
10_Member	GO Biological Processes	GO:0000302	response to reactive oxygen species	-8.24688	-6.26937	836,983,1956,3741,4193,4780,5594,5599,120892	CASP3,CDK1,EGFR,KCNA5,MDM2,NFE2L2,MAPK1,MAPK8,LRRK2	9/182
10_Member	GO Biological Processes	GO:0034614	cellular response to reactive oxygen species	-6.65931	-4.89917	983,1956,4193,4780,5594,5599,120892	CDK1,EGFR,MDM2,NFE2L2,MAPK1,MAPK8,LRRK2	7/135
10_Member	GO Biological Processes	GO:0034599	cellular response to oxidative stress	-6.26922	-4.55474	142,983,1956,4193,4780,5594,5599,120892	PARP1,CDK1,EGFR,MDM2,NFE2L2,MAPK1,MAPK8,LRRK2	8/226
10_Member	GO Biological Processes	GO:0009267	cellular response to starvation	-4.74264	-3.20749	3480,4780,5594,5599,8644,120892	IGF1R,NFE2L2,MAPK1,MAPK8,AKR1C3,LRRK2	6/175
10_Member	GO Biological Processes	GO:0042594	response to starvation	-4.23106	-2.7697	3480,4780,5594,5599,8644,120892	IGF1R,NFE2L2,MAPK1,MAPK8,AKR1C3,LRRK2	6/216
11_Summary	GO Biological Processes	GO:0043523	regulation of neuron apoptotic process	-14.8571	-11.9728	142,836,839,840,841,1020,2908,3717,3791,4170,4544,5290,5663,7015,8851,1268,3164,5468,5599,5743,7421,8644,120892,240,834,1956,4780,5724	PARP1,CASP3,CASP6,CASP7,CASP8,CDK5,NR3C1,JAK2,KDR,MCL1,MTNR1B,PIK3CA,PSEN1,TERT,CDK5R1,CNR1,NR4A1,PPARG,MAPK8,PTGS2,VDR,AKR1C3,LRRK2,ALOX5,CASP1,EGFR,NFE2L2,PTAFR	28/-
11_Member	GO Biological Processes	GO:0043523	regulation of neuron apoptotic process	-14.8571	-11.9728	142,836,839,840,841,1020,2908,3717,3791,4170,4544,5290,5663,7015,8851	PARP1,CASP3,CASP6,CASP7,CASP8,CDK5,NR3C1,JAK2,KDR,MCL1,MTNR1B,PIK3CA,PSEN1,TERT,CDK5R1	15/245
11_Member	GO Biological Processes	GO:0043068	positive regulation of programmed cell death	-13.9218	-11.1771	142,836,839,840,841,1020,1268,2908,3164,3717,4170,5468,5599,5663,5743,7421,8644,8851,120892	PARP1,CASP3,CASP6,CASP7,CASP8,CDK5,CNR1,NR3C1,NR4A1,JAK2,MCL1,PPARG,MAPK8,PSEN1,PTGS2,VDR,AKR1C3,CDK5R1,LRRK2	19/571
11_Member	GO Biological Processes	GO:0043065	positive regulation of apoptotic process	-11.9248	-9.39097	836,839,840,841,1020,1268,2908,3164,3717,4170,5468,5599,5663,5743,7421,8644,8851	CASP3,CASP6,CASP7,CASP8,CDK5,CNR1,NR3C1,NR4A1,JAK2,MCL1,PPARG,MAPK8,PSEN1,PTGS2,VDR,AKR1C3,CDK5R1	17/552
11_Member	GO Biological Processes	GO:0043525	positive regulation of neuron apoptotic process	-10.4003	-8.12546	836,839,840,841,1020,2908,4170,8851	CASP3,CASP6,CASP7,CASP8,CDK5,NR3C1,MCL1,CDK5R1	8/68
11_Member	GO Molecular Functions	GO:0097153	cysteine-type endopeptidase activity involved in apoptotic process	-7.96815	-6.03973	836,839,840,841	CASP3,CASP6,CASP7,CASP8	4/9
11_Member	GO Biological Processes	GO:0006954	inflammatory response	-6.61936	-4.86703	240,834,836,839,841,1956,2908,3164,3717,4780,5663,5724	ALOX5,CASP1,CASP3,CASP6,CASP8,EGFR,NR3C1,NR4A1,JAK2,NFE2L2,PSEN1,PTAFR	12/579
11_Member	GO Biological Processes	GO:0072733	response to staurosporine	-6.54243	-4.80209	836,839,840	CASP3,CASP6,CASP7	3/5
11_Member	GO Biological Processes	GO:0072734	cellular response to staurosporine	-6.54243	-4.80209	836,839,840	CASP3,CASP6,CASP7	3/5
11_Member	GO Molecular Functions	GO:0097200	cysteine-type endopeptidase activity involved in execution phase of apoptosis	-6.54243	-4.80209	836,839,840	CASP3,CASP6,CASP7	3/5
11_Member	GO Biological Processes	GO:0070269	pyroptotic inflammatory response	-5.53642	-3.90902	834,836,839,841	CASP1,CASP3,CASP6,CASP8	4/32
11_Member	GO Molecular Functions	GO:0004197	cysteine-type endopeptidase activity	-5.16006	-3.573	834,836,839,840,841	CASP1,CASP3,CASP6,CASP7,CASP8	5/85
11_Member	GO Biological Processes	GO:0097194	execution phase of apoptosis	-4.64724	-3.12334	836,839,840,841	CASP3,CASP6,CASP7,CASP8	4/53
11_Member	KEGG Pathway	hsa05134	Legionellosis	-4.55192	-3.04656	834,836,840,841	CASP1,CASP3,CASP7,CASP8	4/56
11_Member	KEGG Pathway	hsa04623	Cytosolic DNA-sensing pathway	-3.88041	-2.46616	834,836,840,841	CASP1,CASP3,CASP7,CASP8	4/83
11_Member	GO Molecular Functions	GO:0008234	cysteine-type peptidase activity	-3.55949	-2.19322	834,836,839,840,841	CASP1,CASP3,CASP6,CASP7,CASP8	5/184
12_Summary	GO Biological Processes	GO:0071214	cellular response to abiotic stimulus	-14.4524	-11.6242	142,231,834,836,841,1111,1432,1956,3480,3753,4193,4312,5290,5599,5724,5743,3741,3784,5747,898,1017,4170,5243,5594,8644	PARP1,AKR1B1,CASP1,CASP3,CASP8,CHEK1,MAPK14,EGFR,IGF1R,KCNE1,MDM2,MMP1,PIK3CA,MAPK8,PTAFR,PTGS2,KCNA5,KCNQ1,PTK2,CCNE1,CDK2,MCL1,ABCB1,MAPK1,AKR1C3	25/-
12_Member	GO Biological Processes	GO:0071214	cellular response to abiotic stimulus	-14.4524	-11.6242	142,231,834,836,841,1111,1432,1956,3480,3753,4193,4312,5290,5599,5724,5743	PARP1,AKR1B1,CASP1,CASP3,CASP8,CHEK1,MAPK14,EGFR,IGF1R,KCNE1,MDM2,MMP1,PIK3CA,MAPK8,PTAFR,PTGS2	16/320
12_Member	GO Biological Processes	GO:0104004	cellular response to environmental stimulus	-14.4524	-11.6242	142,231,834,836,841,1111,1432,1956,3480,3753,4193,4312,5290,5599,5724,5743	PARP1,AKR1B1,CASP1,CASP3,CASP8,CHEK1,MAPK14,EGFR,IGF1R,KCNE1,MDM2,MMP1,PIK3CA,MAPK8,PTAFR,PTGS2	16/320
12_Member	GO Biological Processes	GO:0009612	response to mechanical stimulus	-11.3534	-8.89875	834,841,1111,1432,1956,3480,3741,3784,5290,5599,5743,5747	CASP1,CASP8,CHEK1,MAPK14,EGFR,IGF1R,KCNA5,KCNQ1,PIK3CA,MAPK8,PTGS2,PTK2	12/220
12_Member	GO Biological Processes	GO:0071260	cellular response to mechanical stimulus	-8.47888	-6.45437	834,841,1111,1956,3480,5599,5743	CASP1,CASP8,CHEK1,EGFR,IGF1R,MAPK8,PTGS2	7/74
12_Member	GO Biological Processes	GO:0071496	cellular response to external stimulus	-8.43742	-6.41703	834,841,1111,1956,3480,5599,5743	CASP1,CASP8,CHEK1,EGFR,IGF1R,MAPK8,PTGS2	7/75
12_Member	KEGG Pathway	hsa05222	Small cell lung cancer	-6.33544	-4.61608	836,898,1017,5290,5743,5747	CASP3,CCNE1,CDK2,PIK3CA,PTGS2,PTK2	6/93
12_Member	KEGG Pathway	hsa05206	MicroRNAs in cancer	-6.24612	-4.53387	836,898,1956,4170,4193,5243,5290,5594,5743	CASP3,CCNE1,EGFR,MCL1,MDM2,ABCB1,PIK3CA,MAPK1,PTGS2	9/312
12_Member	GO Biological Processes	GO:0070542	response to fatty acid	-4.55192	-3.04656	5290,5724,5743,8644	PIK3CA,PTAFR,PTGS2,AKR1C3	4/56
12_Member	GO Biological Processes	GO:0043200	response to amino acid	-4.29893	-2.82785	836,1956,3480,5290,5743	CASP3,EGFR,IGF1R,PIK3CA,PTGS2	5/128
12_Member	GO Biological Processes	GO:0001101	response to acid chemical	-4.07052	-2.63335	836,1956,3480,5290,5743	CASP3,EGFR,IGF1R,PIK3CA,PTGS2	5/143
12_Member	GO Biological Processes	GO:0071229	cellular response to acid chemical	-2.43834	-1.19091	1956,5290,5743	EGFR,PIK3CA,PTGS2	3/99
13_Summary	GO Biological Processes	GO:0070201	regulation of establishment of protein localization	-14.4162	-11.6135	240,846,983,1020,1268,1432,1956,2932,3717,3741,3753,3767,4193,4544,5468,5663,5743,8851,120892,142,3716,5290,7015,7297,5594,3164	ALOX5,CASR,CDK1,CDK5,CNR1,MAPK14,EGFR,GSK3B,JAK2,KCNA5,KCNE1,KCNJ11,MDM2,MTNR1B,PPARG,PSEN1,PTGS2,CDK5R1,LRRK2,PARP1,JAK1,PIK3CA,TERT,TYK2,MAPK1,NR4A1	26/-
13_Member	GO Biological Processes	GO:0070201	regulation of establishment of protein localization	-14.4162	-11.6135	240,846,983,1020,1268,1432,1956,2932,3717,3741,3753,3767,4193,4544,5468,5663,5743,8851,120892	ALOX5,CASR,CDK1,CDK5,CNR1,MAPK14,EGFR,GSK3B,JAK2,KCNA5,KCNE1,KCNJ11,MDM2,MTNR1B,PPARG,PSEN1,PTGS2,CDK5R1,LRRK2	19/536
13_Member	GO Biological Processes	GO:1903829	positive regulation of protein localization	-13.999	-11.2205	142,846,983,1020,1432,1956,2932,3716,3717,3767,4193,5290,5468,5663,5743,7015,7297,8851	PARP1,CASR,CDK1,CDK5,MAPK14,EGFR,GSK3B,JAK1,JAK2,KCNJ11,MDM2,PIK3CA,PPARG,PSEN1,PTGS2,TERT,TYK2,CDK5R1	18/485
13_Member	GO Biological Processes	GO:0051223	regulation of protein transport	-12.3513	-9.77543	240,846,983,1020,1268,1432,1956,2932,3717,3741,3767,4193,4544,5468,5663,5743	ALOX5,CASR,CDK1,CDK5,CNR1,MAPK14,EGFR,GSK3B,JAK2,KCNA5,KCNJ11,MDM2,MTNR1B,PPARG,PSEN1,PTGS2	16/438
13_Member	GO Biological Processes	GO:1900182	positive regulation of protein localization to nucleus	-10.8597	-8.48612	142,983,1432,3716,3717,5663,5743,7015,7297	PARP1,CDK1,MAPK14,JAK1,JAK2,PSEN1,PTGS2,TERT,TYK2	9/93
13_Member	GO Biological Processes	GO:1900180	regulation of protein localization to nucleus	-10.595	-8.27766	142,983,1432,2932,3716,3717,5663,5743,7015,7297	PARP1,CDK1,MAPK14,GSK3B,JAK1,JAK2,PSEN1,PTGS2,TERT,TYK2	10/143
13_Member	GO Biological Processes	GO:1904951	positive regulation of establishment of protein localization	-9.34545	-7.19463	846,983,1020,1432,1956,2932,3717,4193,5468,5663,5743,8851	CASR,CDK1,CDK5,MAPK14,EGFR,GSK3B,JAK2,MDM2,PPARG,PSEN1,PTGS2,CDK5R1	12/328
13_Member	GO Biological Processes	GO:0046824	positive regulation of nucleocytoplasmic transport	-8.97911	-6.88281	983,1432,2932,3717,4193,5663,5743	CDK1,MAPK14,GSK3B,JAK2,MDM2,PSEN1,PTGS2	7/63
13_Member	GO Biological Processes	GO:0046822	regulation of nucleocytoplasmic transport	-8.54862	-6.51576	983,1020,1432,2932,3717,4193,5663,5743	CDK1,CDK5,MAPK14,GSK3B,JAK2,MDM2,PSEN1,PTGS2	8/115
13_Member	GO Biological Processes	GO:0051222	positive regulation of protein transport	-8.19264	-6.22066	846,983,1432,1956,2932,3717,4193,5468,5663,5743	CASR,CDK1,MAPK14,EGFR,GSK3B,JAK2,MDM2,PPARG,PSEN1,PTGS2	10/252
13_Member	GO Biological Processes	GO:0032386	regulation of intracellular transport	-7.90745	-5.98561	983,1020,1432,2932,3717,4193,5594,5663,5743,120892	CDK1,CDK5,MAPK14,GSK3B,JAK2,MDM2,MAPK1,PSEN1,PTGS2,LRRK2	10/270
13_Member	GO Biological Processes	GO:0090316	positive regulation of intracellular protein transport	-7.68179	-5.79295	983,1432,2932,3717,4193,5663,5743	CDK1,MAPK14,GSK3B,JAK2,MDM2,PSEN1,PTGS2	7/96
13_Member	GO Biological Processes	GO:0033157	regulation of intracellular protein transport	-7.63816	-5.75233	983,1020,1432,2932,3717,4193,5663,5743	CDK1,CDK5,MAPK14,GSK3B,JAK2,MDM2,PSEN1,PTGS2	8/150
13_Member	GO Biological Processes	GO:0042307	positive regulation of protein import into nucleus	-6.80999	-5.03614	983,1432,3717,5663,5743	CDK1,MAPK14,JAK2,PSEN1,PTGS2	5/40
13_Member	GO Biological Processes	GO:0032388	positive regulation of intracellular transport	-6.53068	-4.79249	983,1432,2932,3717,4193,5663,5743	CDK1,MAPK14,GSK3B,JAK2,MDM2,PSEN1,PTGS2	7/141
13_Member	GO Biological Processes	GO:0042306	regulation of protein import into nucleus	-5.94886	-4.27238	983,1432,3717,5663,5743	CDK1,MAPK14,JAK2,PSEN1,PTGS2	5/59
13_Member	GO Biological Processes	GO:0014075	response to amine	-3.24387	-1.91668	983,3164,3717	CDK1,NR4A1,JAK2	3/52
14_Summary	GO Biological Processes	GO:0044057	regulation of system process	-13.9218	-11.1771	142,846,1588,1956,2260,3164,3741,3753,3784,4193,4544,5468,5724,5743,7068,7137,7139,10060,120892,1268,1585,3643,5243,5290,5742	PARP1,CASR,CYP19A1,EGFR,FGFR1,NR4A1,KCNA5,KCNE1,KCNQ1,MDM2,MTNR1B,PPARG,PTAFR,PTGS2,THRB,TNNI3,TNNT2,ABCC9,LRRK2,CNR1,CYP11B2,INSR,ABCB1,PIK3CA,PTGS1	25/-
14_Member	GO Biological Processes	GO:0044057	regulation of system process	-13.9218	-11.1771	142,846,1588,1956,2260,3164,3741,3753,3784,4193,4544,5468,5724,5743,7068,7137,7139,10060,120892	PARP1,CASR,CYP19A1,EGFR,FGFR1,NR4A1,KCNA5,KCNE1,KCNQ1,MDM2,MTNR1B,PPARG,PTAFR,PTGS2,THRB,TNNI3,TNNT2,ABCC9,LRRK2	19/571
14_Member	GO Biological Processes	GO:0003013	circulatory system process	-13.6399	-10.9266	846,1268,1585,1956,3643,3741,3753,3784,4544,5243,5290,5468,5724,5742,5743,7137,7139,10060	CASR,CNR1,CYP11B2,EGFR,INSR,KCNA5,KCNE1,KCNQ1,MTNR1B,ABCB1,PIK3CA,PPARG,PTAFR,PTGS1,PTGS2,TNNI3,TNNT2,ABCC9	18/509
14_Member	GO Biological Processes	GO:0008015	blood circulation	-12.6448	-10.0463	846,1268,1585,1956,3741,3753,3784,4544,5290,5468,5724,5742,5743,7137,7139,10060	CASR,CNR1,CYP11B2,EGFR,KCNA5,KCNE1,KCNQ1,MTNR1B,PIK3CA,PPARG,PTAFR,PTGS1,PTGS2,TNNI3,TNNT2,ABCC9	16/419
14_Member	GO Biological Processes	GO:0008217	regulation of blood pressure	-8.14406	-6.18115	1268,1585,3784,5468,5724,5742,5743,7137,10060	CNR1,CYP11B2,KCNQ1,PPARG,PTAFR,PTGS1,PTGS2,TNNI3,ABCC9	9/187
14_Member	GO Biological Processes	GO:0090257	regulation of muscle system process	-5.91369	-4.24182	142,3164,3784,5468,5724,5743,7137,7139	PARP1,NR4A1,KCNQ1,PPARG,PTAFR,PTGS2,TNNI3,TNNT2	8/252
14_Member	GO Biological Processes	GO:0006937	regulation of muscle contraction	-4.78513	-3.24459	3164,3784,5724,5743,7137,7139	NR4A1,KCNQ1,PTAFR,PTGS2,TNNI3,TNNT2	6/172
14_Member	GO Biological Processes	GO:0045933	positive regulation of muscle contraction	-3.29406	-1.96312	3784,5724,5743	KCNQ1,PTAFR,PTGS2	3/50
14_Member	GO Biological Processes	GO:0006940	regulation of smooth muscle contraction	-3.04083	-1.73301	5724,5743,7137	PTAFR,PTGS2,TNNI3	3/61
14_Member	GO Biological Processes	GO:0006942	regulation of striated muscle contraction	-2.42608	-1.17972	3164,3784,7137	NR4A1,KCNQ1,TNNI3	3/100
15_Summary	GO Molecular Functions	GO:0019900	kinase binding	-13.4409	-10.7376	142,834,846,890,891,898,1432,1956,2099,2908,2915,2932,3717,3741,3784,5599,5724,5747,6790,7137,8851	PARP1,CASP1,CASR,CCNA2,CCNB1,CCNE1,MAPK14,EGFR,ESR1,NR3C1,GRM5,GSK3B,JAK2,KCNA5,KCNQ1,MAPK8,PTAFR,PTK2,AURKA,TNNI3,CDK5R1	21/-
15_Member	GO Molecular Functions	GO:0019900	kinase binding	-13.4409	-10.7376	142,834,846,890,891,898,1432,1956,2099,2908,2915,2932,3717,3741,3784,5599,5724,5747,6790,7137,8851	PARP1,CASP1,CASR,CCNA2,CCNB1,CCNE1,MAPK14,EGFR,ESR1,NR3C1,GRM5,GSK3B,JAK2,KCNA5,KCNQ1,MAPK8,PTAFR,PTK2,AURKA,TNNI3,CDK5R1	21/794
15_Member	GO Molecular Functions	GO:0019901	protein kinase binding	-13.2452	-10.5517	142,846,890,891,898,1432,1956,2099,2908,2915,2932,3717,3741,3784,5599,5724,5747,6790,7137,8851	PARP1,CASR,CCNA2,CCNB1,CCNE1,MAPK14,EGFR,ESR1,NR3C1,GRM5,GSK3B,JAK2,KCNA5,KCNQ1,MAPK8,PTAFR,PTK2,AURKA,TNNI3,CDK5R1	20/715
16_Summary	GO Biological Processes	GO:0010817	regulation of hormone levels	-13.1888	-10.5049	231,240,846,1268,1585,1588,1956,2099,2260,2908,3480,3717,3741,3767,3784,4544,5468,8644,1020,1066,5724,120892,3643,5243,5743,10060,2932,5290,7139,23385,1432,2263,6790	AKR1B1,ALOX5,CASR,CNR1,CYP11B2,CYP19A1,EGFR,ESR1,FGFR1,NR3C1,IGF1R,JAK2,KCNA5,KCNJ11,KCNQ1,MTNR1B,PPARG,AKR1C3,CDK5,CES1,PTAFR,LRRK2,INSR,ABCB1,PTGS2,ABCC9,GSK3B,PIK3CA,TNNT2,NCSTN,MAPK14,FGFR2,AURKA	33/-
16_Member	GO Biological Processes	GO:0010817	regulation of hormone levels	-13.1888	-10.5049	231,240,846,1268,1585,1588,1956,2099,2260,2908,3480,3717,3741,3767,3784,4544,5468,8644	AKR1B1,ALOX5,CASR,CNR1,CYP11B2,CYP19A1,EGFR,ESR1,FGFR1,NR3C1,IGF1R,JAK2,KCNA5,KCNJ11,KCNQ1,MTNR1B,PPARG,AKR1C3	18/541
16_Member	GO Biological Processes	GO:0051046	regulation of secretion	-10.23	-7.99384	240,846,1020,1066,1268,1588,1956,2260,3717,3741,3767,3784,4544,5468,5724,120892	ALOX5,CASR,CDK5,CES1,CNR1,CYP19A1,EGFR,FGFR1,JAK2,KCNA5,KCNJ11,KCNQ1,MTNR1B,PPARG,PTAFR,LRRK2	16/607
16_Member	GO Biological Processes	GO:0046883	regulation of hormone secretion	-9.35143	-7.19783	240,846,1268,1588,1956,2260,3717,3741,3767,4544,5468	ALOX5,CASR,CNR1,CYP19A1,EGFR,FGFR1,JAK2,KCNA5,KCNJ11,MTNR1B,PPARG	11/255
16_Member	GO Biological Processes	GO:1903530	regulation of secretion by cell	-8.75909	-6.7024	240,846,1020,1268,1588,1956,2260,3717,3741,3767,4544,5468,5724,120892	ALOX5,CASR,CDK5,CNR1,CYP19A1,EGFR,FGFR1,JAK2,KCNA5,KCNJ11,MTNR1B,PPARG,PTAFR,LRRK2	14/553
16_Member	GO Biological Processes	GO:0050708	regulation of protein secretion	-6.82792	-5.04916	240,846,1268,1956,3717,3741,3767,4544,5468	ALOX5,CASR,CNR1,EGFR,JAK2,KCNA5,KCNJ11,MTNR1B,PPARG	9/266
16_Member	GO Biological Processes	GO:0090276	regulation of peptide hormone secretion	-6.7059	-4.9401	240,846,1268,1956,3717,3741,3767,4544	ALOX5,CASR,CNR1,EGFR,JAK2,KCNA5,KCNJ11,MTNR1B	8/198
16_Member	GO Biological Processes	GO:0002791	regulation of peptide secretion	-6.656	-4.8981	240,846,1268,1956,3717,3741,3767,4544	ALOX5,CASR,CNR1,EGFR,JAK2,KCNA5,KCNJ11,MTNR1B	8/201
16_Member	GO Biological Processes	GO:0090087	regulation of peptide transport	-6.656	-4.8981	240,846,1268,1956,3717,3741,3767,4544	ALOX5,CASR,CNR1,EGFR,JAK2,KCNA5,KCNJ11,MTNR1B	8/201
16_Member	GO Biological Processes	GO:0050796	regulation of insulin secretion	-6.01677	-4.32996	240,846,1268,3717,3741,3767,4544	ALOX5,CASR,CNR1,JAK2,KCNA5,KCNJ11,MTNR1B	7/168
16_Member	GO Biological Processes	GO:0003018	vascular process in circulatory system	-5.64302	-3.99791	846,1956,3643,3741,4544,5243,5743,10060	CASR,EGFR,INSR,KCNA5,MTNR1B,ABCB1,PTGS2,ABCC9	8/274
16_Member	GO Biological Processes	GO:0019229	regulation of vasoconstriction	-5.63989	-3.99732	846,1956,3741,4544,5743	CASR,EGFR,KCNA5,MTNR1B,PTGS2	5/68
16_Member	GO Biological Processes	GO:1903532	positive regulation of secretion by cell	-5.44986	-3.82823	846,1020,1588,1956,2260,3717,5468,5724	CASR,CDK5,CYP19A1,EGFR,FGFR1,JAK2,PPARG,PTAFR	8/291
16_Member	GO Biological Processes	GO:0046887	positive regulation of hormone secretion	-5.22551	-3.63237	846,1588,1956,2260,3717,5468	CASR,CYP19A1,EGFR,FGFR1,JAK2,PPARG	6/144
16_Member	GO Biological Processes	GO:0051047	positive regulation of secretion	-5.21774	-3.62536	846,1020,1588,1956,2260,3717,5468,5724	CASR,CDK5,CYP19A1,EGFR,FGFR1,JAK2,PPARG,PTAFR	8/313
16_Member	GO Biological Processes	GO:0090066	regulation of anatomical structure size	-4.58323	-3.06823	846,1020,1956,2932,3741,4544,5290,5743,120892	CASR,CDK5,EGFR,GSK3B,KCNA5,MTNR1B,PIK3CA,PTGS2,LRRK2	9/501
16_Member	GO Biological Processes	GO:0051592	response to calcium ion	-4.23529	-2.77336	846,1956,7139,8644,23385	CASR,EGFR,TNNT2,AKR1C3,NCSTN	5/132
16_Member	GO Biological Processes	GO:0035296	regulation of tube diameter	-3.93228	-2.51086	846,1956,3741,4544,5743	CASR,EGFR,KCNA5,MTNR1B,PTGS2	5/153
16_Member	GO Biological Processes	GO:0097746	blood vessel diameter maintenance	-3.93228	-2.51086	846,1956,3741,4544,5743	CASR,EGFR,KCNA5,MTNR1B,PTGS2	5/153
16_Member	GO Biological Processes	GO:0035150	regulation of tube size	-3.919	-2.49913	846,1956,3741,4544,5743	CASR,EGFR,KCNA5,MTNR1B,PTGS2	5/154
16_Member	GO Biological Processes	GO:0045907	positive regulation of vasoconstriction	-3.8329	-2.42669	846,1956,5743	CASR,EGFR,PTGS2	3/33
16_Member	GO Biological Processes	GO:0050714	positive regulation of protein secretion	-2.93898	-1.64302	846,1956,3717,5468	CASR,EGFR,JAK2,PPARG	4/147
16_Member	GO Biological Processes	GO:0001503	ossification	-2.68082	-1.40782	846,1432,1956,2263,5743	CASR,MAPK14,EGFR,FGFR2,PTGS2	5/289
16_Member	GO Biological Processes	GO:0042303	molting cycle	-2.46327	-1.21241	1956,2263,5743	EGFR,FGFR2,PTGS2	3/97
16_Member	GO Biological Processes	GO:0042633	hair cycle	-2.46327	-1.21241	1956,2263,5743	EGFR,FGFR2,PTGS2	3/97
16_Member	GO Biological Processes	GO:0090277	positive regulation of peptide hormone secretion	-2.29942	-1.06663	846,1956,3717	CASR,EGFR,JAK2	3/111
16_Member	GO Biological Processes	GO:0002793	positive regulation of peptide secretion	-2.27787	-1.04709	846,1956,3717	CASR,EGFR,JAK2	3/113
16_Member	GO Cellular Components	GO:0016323	basolateral plasma membrane	-2.06683	-0.853008	846,1956,3784,6790	CASR,EGFR,KCNQ1,AURKA	4/258
17_Summary	GO Biological Processes	GO:0045862	positive regulation of proteolysis	-12.8258	-10.1867	834,841,2932,3717,4170,4193,4780,5468,5663,5747,6790,23385,51107,55851,120892,1017,1020,890,1111,2260,3643,7137,2263,836,839,5467	CASP1,CASP8,GSK3B,JAK2,MCL1,MDM2,NFE2L2,PPARG,PSEN1,PTK2,AURKA,NCSTN,APH1A,PSENEN,LRRK2,CDK2,CDK5,CCNA2,CHEK1,FGFR1,INSR,TNNI3,FGFR2,CASP3,CASP6,PPARD	26/-
17_Member	GO Biological Processes	GO:0045862	positive regulation of proteolysis	-12.8258	-10.1867	834,841,2932,3717,4170,4193,4780,5468,5663,5747,6790,23385,51107,55851,120892	CASP1,CASP8,GSK3B,JAK2,MCL1,MDM2,NFE2L2,PPARG,PSEN1,PTK2,AURKA,NCSTN,APH1A,PSENEN,LRRK2	15/337
17_Member	GO Biological Processes	GO:0030162	regulation of proteolysis	-11.3626	-8.90236	834,841,1017,1020,2932,3717,4170,4193,4780,5468,5663,5747,6790,23385,51107,55851,120892	CASP1,CASP8,CDK2,CDK5,GSK3B,JAK2,MCL1,MDM2,NFE2L2,PPARG,PSEN1,PTK2,AURKA,NCSTN,APH1A,PSENEN,LRRK2	17/599
17_Member	GO Molecular Functions	GO:0019904	protein domain specific binding	-8.77064	-6.70495	834,841,890,1017,1111,2260,3643,3717,4170,4193,4780,5468,5663,5747,7137	CASP1,CASP8,CCNA2,CDK2,CHEK1,FGFR1,INSR,JAK2,MCL1,MDM2,NFE2L2,PPARG,PSEN1,PTK2,TNNI3	15/655
17_Member	GO Biological Processes	GO:0010950	positive regulation of endopeptidase activity	-7.59323	-5.71039	834,841,3717,4170,5468,23385,51107,55851	CASP1,CASP8,JAK2,MCL1,PPARG,NCSTN,APH1A,PSENEN	8/152
17_Member	GO Biological Processes	GO:0010952	positive regulation of peptidase activity	-7.29548	-5.45661	834,841,3717,4170,5468,23385,51107,55851	CASP1,CASP8,JAK2,MCL1,PPARG,NCSTN,APH1A,PSENEN	8/166
17_Member	GO Biological Processes	GO:0051345	positive regulation of hydrolase activity	-6.99776	-5.20248	834,841,2260,2263,2932,3717,4170,5468,23385,51107,55851	CASP1,CASP8,FGFR1,FGFR2,GSK3B,JAK2,MCL1,PPARG,NCSTN,APH1A,PSENEN	11/431
17_Member	GO Biological Processes	GO:0051336	regulation of hydrolase activity	-6.67155	-4.90915	834,841,2260,2263,2932,3717,4170,5468,5747,23385,51107,55851,120892	CASP1,CASP8,FGFR1,FGFR2,GSK3B,JAK2,MCL1,PPARG,PTK2,NCSTN,APH1A,PSENEN,LRRK2	13/689
17_Member	GO Biological Processes	GO:0052548	regulation of endopeptidase activity	-5.60799	-3.97222	834,841,3717,4170,5468,23385,51107,55851	CASP1,CASP8,JAK2,MCL1,PPARG,NCSTN,APH1A,PSENEN	8/277
17_Member	GO Biological Processes	GO:0052547	regulation of peptidase activity	-5.342	-3.73247	834,841,3717,4170,5468,23385,51107,55851	CASP1,CASP8,JAK2,MCL1,PPARG,NCSTN,APH1A,PSENEN	8/301
17_Member	GO Biological Processes	GO:0097190	apoptotic signaling pathway	-5.19755	-3.60746	836,839,841,2932,3717,4170,5467,5663	CASP3,CASP6,CASP8,GSK3B,JAK2,MCL1,PPARD,PSEN1	8/315
17_Member	GO Biological Processes	GO:0043280	positive regulation of cysteine-type endopeptidase activity involved in apoptotic process	-4.55834	-3.04794	834,841,3717,4170,5468	CASP1,CASP8,JAK2,MCL1,PPARG	5/113
17_Member	GO Biological Processes	GO:2001056	positive regulation of cysteine-type endopeptidase activity	-4.28282	-2.81462	834,841,3717,4170,5468	CASP1,CASP8,JAK2,MCL1,PPARG	5/129
17_Member	GO Biological Processes	GO:0006919	activation of cysteine-type endopeptidase activity involved in apoptotic process	-4.0976	-2.65613	841,3717,4170,5468	CASP8,JAK2,MCL1,PPARG	4/73
17_Member	GO Biological Processes	GO:0043281	regulation of cysteine-type endopeptidase activity involved in apoptotic process	-3.82861	-2.4239	834,841,3717,4170,5468	CASP1,CASP8,JAK2,MCL1,PPARG	5/161
17_Member	GO Biological Processes	GO:2000116	regulation of cysteine-type endopeptidase activity	-3.48491	-2.12719	834,841,3717,4170,5468	CASP1,CASP8,JAK2,MCL1,PPARG	5/191
17_Member	GO Biological Processes	GO:0097191	extrinsic apoptotic signaling pathway	-3.38124	-2.03668	841,2932,3717,4170	CASP8,GSK3B,JAK2,MCL1	4/112
17_Member	GO Biological Processes	GO:0032731	positive regulation of interleukin-1 beta production	-3.02026	-1.71493	834,841,3717	CASP1,CASP8,JAK2	3/62
17_Member	GO Biological Processes	GO:0032732	positive regulation of interleukin-1 production	-2.79789	-1.51637	834,841,3717	CASP1,CASP8,JAK2	3/74
17_Member	GO Biological Processes	GO:0097193	intrinsic apoptotic signaling pathway	-2.77406	-1.49477	836,839,3717,4170	CASP3,CASP6,JAK2,MCL1	4/163
17_Member	GO Biological Processes	GO:0032651	regulation of interleukin-1 beta production	-2.31035	-1.07623	834,841,3717	CASP1,CASP8,JAK2	3/110
17_Member	GO Biological Processes	GO:0032652	regulation of interleukin-1 production	-2.11012	-0.891471	834,841,3717	CASP1,CASP8,JAK2	3/130
18_Summary	GO Biological Processes	GO:0007507	heart development	-12.7533	-10.1226	836,840,841,983,2260,2263,3480,3643,3767,3784,3791,4193,5594,5663,5747,7137,7139,10060,1020,1432,3164	CASP3,CASP7,CASP8,CDK1,FGFR1,FGFR2,IGF1R,INSR,KCNJ11,KCNQ1,KDR,MDM2,MAPK1,PSEN1,PTK2,TNNI3,TNNT2,ABCC9,CDK5,MAPK14,NR4A1	21/-
18_Member	GO Biological Processes	GO:0007507	heart development	-12.7533	-10.1226	836,840,841,983,2260,2263,3480,3643,3767,3784,3791,4193,5594,5663,5747,7137,7139,10060	CASP3,CASP7,CASP8,CDK1,FGFR1,FGFR2,IGF1R,INSR,KCNJ11,KCNQ1,KDR,MDM2,MAPK1,PSEN1,PTK2,TNNI3,TNNT2,ABCC9	18/574
18_Member	GO Biological Processes	GO:0060537	muscle tissue development	-5.80262	-4.14164	983,1020,1432,2260,2263,3164,3767,7137,7139	CDK1,CDK5,MAPK14,FGFR1,FGFR2,NR4A1,KCNJ11,TNNI3,TNNT2	9/353
18_Member	GO Biological Processes	GO:0003007	heart morphogenesis	-5.76296	-4.10732	2263,3643,4193,5663,5747,7137,7139,10060	FGFR2,INSR,MDM2,PSEN1,PTK2,TNNI3,TNNT2,ABCC9	8/264
18_Member	GO Biological Processes	GO:0048738	cardiac muscle tissue development	-4.44122	-2.95123	983,2260,2263,3767,7137,7139	CDK1,FGFR1,FGFR2,KCNJ11,TNNI3,TNNT2	6/198
18_Member	GO Biological Processes	GO:0061061	muscle structure development	-4.43165	-2.94586	836,840,983,1020,1432,2263,3164,7137,7139	CASP3,CASP7,CDK1,CDK5,MAPK14,FGFR2,NR4A1,TNNI3,TNNT2	9/524
18_Member	GO Biological Processes	GO:0014706	striated muscle tissue development	-4.3689	-2.89082	983,2260,2263,3767,7137,7139	CDK1,FGFR1,FGFR2,KCNJ11,TNNI3,TNNT2	6/204
18_Member	GO Biological Processes	GO:0003229	ventricular cardiac muscle tissue development	-4.34913	-2.87398	2263,3767,7137,7139	FGFR2,KCNJ11,TNNI3,TNNT2	4/63
18_Member	GO Biological Processes	GO:0003205	cardiac chamber development	-3.71854	-2.32895	2263,3480,4193,7137,7139	FGFR2,IGF1R,MDM2,TNNI3,TNNT2	5/170
18_Member	GO Biological Processes	GO:0055010	ventricular cardiac muscle tissue morphogenesis	-3.37349	-2.0328	2263,7137,7139	FGFR2,TNNI3,TNNT2	3/47
18_Member	GO Biological Processes	GO:0007517	muscle organ development	-3.34461	-2.00648	1020,1432,2263,3164,7137,7139	CDK5,MAPK14,FGFR2,NR4A1,TNNI3,TNNT2	6/315
18_Member	GO Biological Processes	GO:0003206	cardiac chamber morphogenesis	-3.16268	-1.84452	2263,4193,7137,7139	FGFR2,MDM2,TNNI3,TNNT2	4/128
18_Member	GO Biological Processes	GO:0003231	cardiac ventricle development	-3.15002	-1.83324	2263,4193,7137,7139	FGFR2,MDM2,TNNI3,TNNT2	4/129
18_Member	GO Biological Processes	GO:0051146	striated muscle cell differentiation	-3.14421	-1.82849	836,840,983,1432,7139	CASP3,CASP7,CDK1,MAPK14,TNNT2	5/227
18_Member	GO Biological Processes	GO:0055008	cardiac muscle tissue morphogenesis	-3.04083	-1.73301	2263,7137,7139	FGFR2,TNNI3,TNNT2	3/61
18_Member	GO Biological Processes	GO:0003208	cardiac ventricle morphogenesis	-2.84966	-1.56136	2263,7137,7139	FGFR2,TNNI3,TNNT2	3/71
18_Member	GO Biological Processes	GO:0060415	muscle tissue morphogenesis	-2.79789	-1.51637	2263,7137,7139	FGFR2,TNNI3,TNNT2	3/74
18_Member	GO Biological Processes	GO:0048644	muscle organ morphogenesis	-2.68536	-1.41162	2263,7137,7139	FGFR2,TNNI3,TNNT2	3/81
18_Member	GO Biological Processes	GO:0042692	muscle cell differentiation	-2.66784	-1.39666	836,840,983,1432,7139	CASP3,CASP7,CDK1,MAPK14,TNNT2	5/291
18_Member	GO Biological Processes	GO:0007519	skeletal muscle tissue development	-2.00576	-0.796392	1020,1432,3164	CDK5,MAPK14,NR4A1	3/142
19_Summary	GO Molecular Functions	GO:0004879	nuclear receptor activity	-12.7063	-10.1	2099,2908,3164,4306,5241,5467,5468,7068,7421,3717,5594,760,836,846,1956,2260,2263,3791,4193,5663,7137,7139,1588,2052,3290,4780,7015,7298	ESR1,NR3C1,NR4A1,NR3C2,PGR,PPARD,PPARG,THRB,VDR,JAK2,MAPK1,CA2,CASP3,CASR,EGFR,FGFR1,FGFR2,KDR,MDM2,PSEN1,TNNI3,TNNT2,CYP19A1,EPHX1,HSD11B1,NFE2L2,TERT,TYMS	28/-
19_Member	GO Molecular Functions	GO:0004879	nuclear receptor activity	-12.7063	-10.1	2099,2908,3164,4306,5241,5467,5468,7068,7421	ESR1,NR3C1,NR4A1,NR3C2,PGR,PPARD,PPARG,THRB,VDR	9/59
19_Member	GO Molecular Functions	GO:0098531	ligand-activated transcription factor activity	-12.6368	-10.046	2099,2908,3164,4306,5241,5467,5468,7068,7421	ESR1,NR3C1,NR4A1,NR3C2,PGR,PPARD,PPARG,THRB,VDR	9/60
19_Member	GO Biological Processes	GO:0141193	nuclear receptor-mediated signaling pathway	-11.1262	-8.71898	2099,2908,3717,4306,5241,5468,5594,7068,7421	ESR1,NR3C1,JAK2,NR3C2,PGR,PPARG,MAPK1,THRB,VDR	9/87
19_Member	GO Biological Processes	GO:0030522	intracellular receptor signaling pathway	-10.8192	-8.45272	2099,2908,3164,3717,4306,5241,5467,5468,5594,7068,7421	ESR1,NR3C1,NR4A1,JAK2,NR3C2,PGR,PPARD,PPARG,MAPK1,THRB,VDR	11/186
19_Member	GO Biological Processes	GO:0009755	hormone-mediated signaling pathway	-10.6254	-8.29985	2099,2908,3717,4306,5241,5467,5468,5594,7068,7421	ESR1,NR3C1,JAK2,NR3C2,PGR,PPARD,PPARG,MAPK1,THRB,VDR	10/142
19_Member	GO Biological Processes	GO:0048729	tissue morphogenesis	-9.57434	-7.40659	760,836,846,1956,2099,2260,2263,2908,3791,4193,5241,5663,7137,7139,7421	CA2,CASP3,CASR,EGFR,ESR1,FGFR1,FGFR2,NR3C1,KDR,MDM2,PGR,PSEN1,TNNI3,TNNT2,VDR	15/572
19_Member	GO Biological Processes	GO:0061180	mammary gland epithelium development	-9.18474	-7.0555	2099,2263,2908,3717,5241,5594,7421	ESR1,FGFR2,NR3C1,JAK2,PGR,MAPK1,VDR	7/59
19_Member	GO Biological Processes	GO:0043401	steroid hormone receptor signaling pathway	-8.3165	-6.32195	2099,2908,3717,4306,5241,5467,5594	ESR1,NR3C1,JAK2,NR3C2,PGR,PPARD,MAPK1	7/78
19_Member	GO Biological Processes	GO:0030879	mammary gland development	-8.2065	-6.23268	1588,2099,2263,2908,3717,5241,5594,7421	CYP19A1,ESR1,FGFR2,NR3C1,JAK2,PGR,MAPK1,VDR	8/127
19_Member	GO Molecular Functions	GO:0003707	nuclear steroid receptor activity	-7.88695	-5.96836	2099,2908,4306,5241,5467	ESR1,NR3C1,NR3C2,PGR,PPARD	5/25
19_Member	GO Biological Processes	GO:0002009	morphogenesis of an epithelium	-7.72212	-5.82256	760,836,846,1956,2099,2260,2263,2908,3791,5241,5663,7421	CA2,CASP3,CASR,EGFR,ESR1,FGFR1,FGFR2,NR3C1,KDR,PGR,PSEN1,VDR	12/458
19_Member	GO Molecular Functions	GO:0034056	estrogen response element binding	-7.55207	-5.67811	2099,2908,4306,5241	ESR1,NR3C1,NR3C2,PGR	4/11
19_Member	GO Biological Processes	GO:0022612	gland morphogenesis	-7.41066	-5.5539	1956,2099,2260,2263,2908,5241,7421	EGFR,ESR1,FGFR1,FGFR2,NR3C1,PGR,VDR	7/105
19_Member	GO Biological Processes	GO:0030518	nuclear receptor-mediated steroid hormone signaling pathway	-7.39537	-5.54001	2099,2908,3717,4306,5241,5594	ESR1,NR3C1,JAK2,NR3C2,PGR,MAPK1	6/62
19_Member	GO Biological Processes	GO:0060603	mammary gland duct morphogenesis	-7.38845	-5.53448	2099,2263,2908,5241,7421	ESR1,FGFR2,NR3C1,PGR,VDR	5/31
19_Member	GO Molecular Functions	GO:0005496	steroid binding	-7.35379	-5.50595	2052,2099,2908,3290,4306,5241,7421	EPHX1,ESR1,NR3C1,HSD11B1,NR3C2,PGR,VDR	7/107
19_Member	GO Molecular Functions	GO:0001221	transcription coregulator binding	-7.16333	-5.34476	2099,4780,5241,5467,5468,7015,7068	ESR1,NFE2L2,PGR,PPARD,PPARG,TERT,THRB	7/114
19_Member	GO Molecular Functions	GO:0001223	transcription coactivator binding	-6.59664	-4.84541	2099,5241,5467,7015,7068	ESR1,PGR,PPARD,TERT,THRB	5/44
19_Member	GO Biological Processes	GO:0060443	mammary gland morphogenesis	-6.54655	-4.80209	2099,2263,2908,5241,7421	ESR1,FGFR2,NR3C1,PGR,VDR	5/45
19_Member	GO Biological Processes	GO:0060562	epithelial tube morphogenesis	-6.22301	-4.51378	836,846,2099,2263,2908,3791,5241,5663,7421	CASP3,CASR,ESR1,FGFR2,NR3C1,KDR,PGR,PSEN1,VDR	9/314
19_Member	GO Biological Processes	GO:0061138	morphogenesis of a branching epithelium	-6.03416	-4.34258	846,2099,2260,2263,3791,5241,7421	CASR,ESR1,FGFR1,FGFR2,KDR,PGR,VDR	7/167
19_Member	GO Biological Processes	GO:0060745	mammary gland branching involved in pregnancy	-6.00032	-4.31469	2099,5241,7421	ESR1,PGR,VDR	3/7
19_Member	GO Biological Processes	GO:0001763	morphogenesis of a branching structure	-5.84876	-4.18327	846,2099,2260,2263,3791,5241,7421	CASR,ESR1,FGFR1,FGFR2,KDR,PGR,VDR	7/178
19_Member	GO Biological Processes	GO:0048754	branching morphogenesis of an epithelial tube	-5.33196	-3.72524	846,2099,2263,3791,5241,7421	CASR,ESR1,FGFR2,KDR,PGR,VDR	6/138
19_Member	GO Biological Processes	GO:0060444	branching involved in mammary gland duct morphogenesis	-4.37152	-2.89226	2099,5241,7421	ESR1,PGR,VDR	3/22
19_Member	GO Molecular Functions	GO:0017025	TBP-class protein binding	-4.20024	-2.74394	2099,2908,4306	ESR1,NR3C1,NR3C2	3/25
19_Member	GO Molecular Functions	GO:0140296	general transcription initiation factor binding	-3.21954	-1.894	2099,2908,4306	ESR1,NR3C1,NR3C2	3/53
19_Member	GO Biological Processes	GO:0048286	lung alveolus development	-3.19569	-1.87468	2263,3791,5241	FGFR2,KDR,PGR	3/54
19_Member	GO Molecular Functions	GO:0001228	DNA-binding transcription activator activity, RNA polymerase II-specific	-2.4383	-1.19091	2099,2908,3164,4780,5241,5468	ESR1,NR3C1,NR4A1,NFE2L2,PGR,PPARG	6/475
19_Member	GO Molecular Functions	GO:0001216	DNA-binding transcription activator activity	-2.41182	-1.16684	2099,2908,3164,4780,5241,5468	ESR1,NR3C1,NR4A1,NFE2L2,PGR,PPARG	6/481
19_Member	GO Biological Processes	GO:0002065	columnar/cuboidal epithelial cell differentiation	-2.33255	-1.09473	2263,5241,7298	FGFR2,PGR,TYMS	3/108
20_Summary	KEGG Pathway	hsa04068	FoxO signaling pathway	-12.4171	-9.83385	891,1017,1432,1956,3480,3643,4193,5290,5594,5599,5602,2099,5747,1588,2260,2263,2908,3717,5241,5663,6790,7298,7421,836,3791,2932,142,3784,5468,2322,2052,4780,7015,834,839,1268,5724,7297,23476,890,8900,7068,841,4306,3718,2915,1020,5742	CCNB1,CDK2,MAPK14,EGFR,IGF1R,INSR,MDM2,PIK3CA,MAPK1,MAPK8,MAPK10,ESR1,PTK2,CYP19A1,FGFR1,FGFR2,NR3C1,JAK2,PGR,PSEN1,AURKA,TYMS,VDR,CASP3,KDR,GSK3B,PARP1,KCNQ1,PPARG,FLT3,EPHX1,NFE2L2,TERT,CASP1,CASP6,CNR1,PTAFR,TYK2,BRD4,CCNA2,CCNA1,THRB,CASP8,NR3C2,JAK3,GRM5,CDK5,PTGS1	48/-
20_Member	KEGG Pathway	hsa04068	FoxO signaling pathway	-12.4171	-9.83385	891,1017,1432,1956,3480,3643,4193,5290,5594,5599,5602	CCNB1,CDK2,MAPK14,EGFR,IGF1R,INSR,MDM2,PIK3CA,MAPK1,MAPK8,MAPK10	11/133
20_Member	KEGG Pathway	hsa01522	Endocrine resistance	-12.208	-9.65039	1432,1956,2099,3480,4193,5290,5594,5599,5602,5747	MAPK14,EGFR,ESR1,IGF1R,MDM2,PIK3CA,MAPK1,MAPK8,MAPK10,PTK2	10/99
20_Member	GO Biological Processes	GO:0048732	gland development	-11.3799	-8.91397	1588,1956,2099,2260,2263,2908,3643,3717,5241,5290,5594,5663,6790,7298,7421	CYP19A1,EGFR,ESR1,FGFR1,FGFR2,NR3C1,INSR,JAK2,PGR,PIK3CA,MAPK1,PSEN1,AURKA,TYMS,VDR	15/425
20_Member	KEGG Pathway	hsa05205	Proteoglycans in cancer	-10.3858	-8.11828	836,1432,1956,2099,2260,3480,3791,4193,5290,5594,5747	CASP3,MAPK14,EGFR,ESR1,FGFR1,IGF1R,KDR,MDM2,PIK3CA,MAPK1,PTK2	11/204
20_Member	KEGG Pathway	hsa05224	Breast cancer	-7.68374	-5.79338	1956,2099,2260,2932,3480,5241,5290,5594	EGFR,ESR1,FGFR1,GSK3B,IGF1R,PGR,PIK3CA,MAPK1	8/148
20_Member	GO Biological Processes	GO:0032868	response to insulin	-7.54919	-5.67668	142,1432,2932,3480,3643,3784,5290,5468,5594	PARP1,MAPK14,GSK3B,IGF1R,INSR,KCNQ1,PIK3CA,PPARG,MAPK1	9/219
20_Member	GO Molecular Functions	GO:0043560	insulin receptor substrate binding	-7.21834	-5.38882	3480,3643,3717,5290	IGF1R,INSR,JAK2,PIK3CA	4/13
20_Member	KEGG Pathway	hsa05230	Central carbon metabolism in cancer	-7.03778	-5.23513	1956,2260,2263,2322,5290,5594	EGFR,FGFR1,FGFR2,FLT3,PIK3CA,MAPK1	6/71
20_Member	KEGG Pathway	hsa05218	Melanoma	-6.96491	-5.17448	1956,2260,3480,4193,5290,5594	EGFR,FGFR1,IGF1R,MDM2,PIK3CA,MAPK1	6/73
20_Member	KEGG Pathway	hsa05207	Chemical carcinogenesis - receptor activation	-6.43335	-4.70363	1956,2052,2099,3717,5241,5290,5594,7421	EGFR,EPHX1,ESR1,JAK2,PGR,PIK3CA,MAPK1,VDR	8/215
20_Member	GO Biological Processes	GO:0032869	cellular response to insulin stimulus	-6.34838	-4.628	142,2932,3480,3643,5290,5468,5594	PARP1,GSK3B,IGF1R,INSR,PIK3CA,PPARG,MAPK1	7/150
20_Member	KEGG Pathway	hsa05225	Hepatocellular carcinoma	-5.98231	-4.30117	1956,2932,3480,4780,5290,5594,7015	EGFR,GSK3B,IGF1R,NFE2L2,PIK3CA,MAPK1,TERT	7/170
20_Member	GO Biological Processes	GO:0050778	positive regulation of immune response	-5.95816	-4.28076	834,839,1268,3717,5290,5594,5599,5663,5724,5747,7297,23476	CASP1,CASP6,CNR1,JAK2,PIK3CA,MAPK1,MAPK8,PSEN1,PTAFR,PTK2,TYK2,BRD4	12/669
20_Member	KEGG Pathway	hsa04152	AMPK signaling pathway	-5.6422	-3.99791	890,3480,3643,5290,5468,8900	CCNA2,IGF1R,INSR,PIK3CA,PPARG,CCNA1	6/122
20_Member	KEGG Pathway	hsa04919	Thyroid hormone signaling pathway	-5.6422	-3.99791	2099,2932,4193,5290,5594,7068	ESR1,GSK3B,MDM2,PIK3CA,MAPK1,THRB	6/122
20_Member	GO Biological Processes	GO:0008286	insulin receptor signaling pathway	-5.63989	-3.99732	2932,3480,3643,5290,5594	GSK3B,IGF1R,INSR,PIK3CA,MAPK1	5/68
20_Member	KEGG Pathway	hsa01524	Platinum drug resistance	-5.42833	-3.80833	836,841,4193,5290,5594	CASP3,CASP8,MDM2,PIK3CA,MAPK1	5/75
20_Member	KEGG Pathway	hsa05214	Glioma	-5.39983	-3.78308	1956,3480,4193,5290,5594	EGFR,IGF1R,MDM2,PIK3CA,MAPK1	5/76
20_Member	KEGG Pathway	hsa04960	Aldosterone-regulated sodium reabsorption	-5.23027	-3.63328	3643,4306,5290,5594	INSR,NR3C2,PIK3CA,MAPK1	4/38
20_Member	KEGG Pathway	hsa04520	Adherens junction	-4.96866	-3.40727	1956,2260,3480,3643,5594	EGFR,FGFR1,IGF1R,INSR,MAPK1	5/93
20_Member	KEGG Pathway	hsa04066	HIF-1 signaling pathway	-4.63382	-3.11187	1956,3480,3643,5290,5594	EGFR,IGF1R,INSR,PIK3CA,MAPK1	5/109
20_Member	KEGG Pathway	hsa04062	Chemokine signaling pathway	-4.50336	-3.00472	2932,3717,3718,5290,5594,5747	GSK3B,JAK2,JAK3,PIK3CA,MAPK1,PTK2	6/193
20_Member	KEGG Pathway	hsa05213	Endometrial cancer	-4.46189	-2.96947	1956,2932,5290,5594	EGFR,GSK3B,PIK3CA,MAPK1	4/59
20_Member	GO Biological Processes	GO:0038127	ERBB signaling pathway	-4.29557	-2.82622	1956,5290,5594,5747	EGFR,PIK3CA,MAPK1,PTK2	4/65
20_Member	GO Molecular Functions	GO:0043548	phosphatidylinositol 3-kinase binding	-4.14797	-2.69887	3480,3643,3717	IGF1R,INSR,JAK2	3/26
20_Member	KEGG Pathway	hsa04915	Estrogen signaling pathway	-4.12879	-2.68079	1956,2099,5241,5290,5594	EGFR,ESR1,PGR,PIK3CA,MAPK1	5/139
20_Member	KEGG Pathway	hsa05223	Non-small cell lung cancer	-4.0976	-2.65613	1956,3718,5290,5594	EGFR,JAK3,PIK3CA,MAPK1	4/73
20_Member	KEGG Pathway	hsa04810	Regulation of actin cytoskeleton	-4.08061	-2.64237	1956,2260,2263,5290,5594,5747	EGFR,FGFR1,FGFR2,PIK3CA,MAPK1,PTK2	6/230
20_Member	KEGG Pathway	hsa04072	Phospholipase D signaling pathway	-3.98636	-2.55923	1956,2915,3643,5290,5594	EGFR,GRM5,INSR,PIK3CA,MAPK1	5/149
20_Member	GO Biological Processes	GO:0048009	insulin-like growth factor receptor signaling pathway	-3.87331	-2.46058	3480,5290,5594	IGF1R,PIK3CA,MAPK1	3/32
20_Member	KEGG Pathway	hsa04150	mTOR signaling pathway	-3.86681	-2.45459	2932,3480,3643,5290,5594	GSK3B,IGF1R,INSR,PIK3CA,MAPK1	5/158
20_Member	KEGG Pathway	hsa04211	Longevity regulating pathway	-3.74442	-2.35098	3480,3643,5290,5468	IGF1R,INSR,PIK3CA,PPARG	4/90
20_Member	KEGG Pathway	hsa04140	Autophagy - animal	-3.73045	-2.33797	3480,5290,5594,5599,5602	IGF1R,PIK3CA,MAPK1,MAPK8,MAPK10	5/169
20_Member	GO Biological Processes	GO:0002764	immune response-regulating signaling pathway	-3.68677	-2.30099	834,5290,5594,5599,5602,5663,5747	CASP1,PIK3CA,MAPK1,MAPK8,MAPK10,PSEN1,PTK2	7/387
20_Member	GO Biological Processes	GO:0002768	immune response-regulating cell surface receptor signaling pathway	-3.5918	-2.22096	5290,5594,5599,5602,5663,5747	PIK3CA,MAPK1,MAPK8,MAPK10,PSEN1,PTK2	6/283
20_Member	KEGG Pathway	hsa04360	Axon guidance	-3.55949	-2.19322	1020,2932,5290,5594,5747	CDK5,GSK3B,PIK3CA,MAPK1,PTK2	5/184
20_Member	KEGG Pathway	hsa04725	Cholinergic synapse	-3.33777	-2.00135	3717,3784,5290,5594	JAK2,KCNQ1,PIK3CA,MAPK1	4/115
20_Member	GO Biological Processes	GO:0007173	epidermal growth factor receptor signaling pathway	-3.31996	-1.98608	1956,5290,5747	EGFR,PIK3CA,PTK2	3/49
20_Member	KEGG Pathway	hsa04611	Platelet activation	-3.20131	-1.87948	1432,5290,5594,5742	MAPK14,PIK3CA,MAPK1,PTGS1	4/125
20_Member	KEGG Pathway	hsa04213	Longevity regulating pathway - multiple species	-3.02026	-1.71493	3480,3643,5290	IGF1R,INSR,PIK3CA	3/62
20_Member	GO Biological Processes	GO:0002253	activation of immune response	-2.8814	-1.59006	834,839,5290,5594,5663,5747	CASP1,CASP6,PIK3CA,MAPK1,PSEN1,PTK2	6/387
20_Member	KEGG Pathway	hsa05220	Chronic myeloid leukemia	-2.74832	-1.47089	4193,5290,5594	MDM2,PIK3CA,MAPK1	3/77
20_Member	KEGG Pathway	hsa04662	B cell receptor signaling pathway	-2.54156	-1.28227	2932,5290,5594	GSK3B,PIK3CA,MAPK1	3/91
20_Member	KEGG Pathway	hsa04613	Neutrophil extracellular trap formation	-2.51668	-1.26127	834,1432,5290,5594	CASP1,MAPK14,PIK3CA,MAPK1	4/192
20_Member	GO Biological Processes	GO:0002757	immune response-activating signaling pathway	-2.4848	-1.23255	834,5290,5594,5663,5747	CASP1,PIK3CA,MAPK1,PSEN1,PTK2	5/321
20_Member	GO Biological Processes	GO:0050852	T cell receptor signaling pathway	-2.27787	-1.04709	5290,5594,5663	PIK3CA,MAPK1,PSEN1	3/113
20_Member	GO Biological Processes	GO:0043244	regulation of protein-containing complex disassembly	-2.1664	-0.943201	3480,3643,5290	IGF1R,INSR,PIK3CA	3/124
20_Member	GO Biological Processes	GO:0035270	endocrine system development	-2.12855	-0.908285	2908,3643,5594	NR3C1,INSR,MAPK1	3/128
20_Member	GO Biological Processes	GO:0002429	immune response-activating cell surface receptor signaling pathway	-2.1258	-0.905856	5290,5594,5663,5747	PIK3CA,MAPK1,PSEN1,PTK2	4/248
20_Member	KEGG Pathway	hsa04650	Natural killer cell mediated cytotoxicity	-2.06538	-0.852195	836,5290,5594	CASP3,PIK3CA,MAPK1	3/135

## Sheet: Annotation-HA and Brain injury
MyList	Gene ID	Type	Tax ID	Homologene Gene ID	Homologene Gene Tax ID	GO:1901699 cellular response to nitrogen	GO:0071407 cellular response to organic c	hsa05200 Pathways in cancer	GO:0016310 phosphorylation	GO:0048545 response to steroid hormone	hsa05417 Lipid and atherosclerosis	GO:0042391 regulation of membrane potenti	hsa04914 Progesterone-mediated oocyte m	hsa05010 Alzheimer disease	GO:0010038 response to metal ion	GO:0043523 regulation of neuron apoptotic	GO:0071214 cellular response to abiotic s	GO:0070201 regulation of establishment of	GO:0044057 regulation of system process	GO:0019900 kinase binding	GO:0010817 regulation of hormone levels	GO:0045862 positive regulation of proteol	GO:0007507 heart development	GO:0004879 nuclear receptor activity	hsa04068 FoxO signaling pathway
PPARG	5468	symbol	H. sapiens	5468	H. sapiens	1	0	1	1	0	1	1	0	0	1	1	0	1	1	0	1	1	0	1	1
PPARD	5467	symbol	H. sapiens	5467	H. sapiens	1	1	1	1	1	1	0	0	0	1	0	0	0	0	0	0	1	0	1	0
NR3C1	2908	symbol	H. sapiens	2908	H. sapiens	1	1	0	1	1	0	1	1	1	0	1	0	0	0	1	1	0	0	1	1
THRB	7068	symbol	H. sapiens	7068	H. sapiens	1	0	0	0	1	0	1	0	1	0	0	0	0	1	0	0	0	0	1	1
ESR1	2099	symbol	H. sapiens	2099	H. sapiens	1	1	1	1	1	1	0	0	0	0	0	0	0	0	1	1	0	0	1	1
NFE2L2	4780	symbol	H. sapiens	4780	H. sapiens	1	0	1	1	0	1	0	0	0	1	1	0	0	0	0	0	1	0	1	1
KCNA5	3741	symbol	H. sapiens	3741	H. sapiens	0	0	0	0	0	0	1	0	0	1	0	1	1	1	1	1	0	0	0	0
KCNE1	3753	symbol	H. sapiens	3753	H. sapiens	1	1	0	0	0	0	1	0	0	0	0	1	1	1	0	0	0	0	0	0
ALOX5	240	symbol	H. sapiens	240	H. sapiens	0	0	0	0	1	1	0	0	0	0	1	0	1	0	0	1	0	0	0	0
ABCC9	10060	symbol	H. sapiens	10060	H. sapiens	0	0	0	1	0	0	1	0	0	0	0	0	0	1	0	1	0	1	0	0
NR3C2	4306	symbol	H. sapiens	4306	H. sapiens	1	1	0	0	1	0	1	0	0	0	0	0	0	0	0	0	0	0	1	1
PGR	5241	symbol	H. sapiens	5241	H. sapiens	1	1	0	1	1	0	0	1	0	0	0	0	0	0	0	0	0	0	1	1
JAK1	3716	symbol	H. sapiens	3716	H. sapiens	1	0	1	1	0	1	0	0	0	0	0	0	1	0	0	0	0	0	0	0
JAK2	3717	symbol	H. sapiens	3717	H. sapiens	1	1	1	1	1	1	1	0	1	1	1	0	1	0	1	1	1	0	1	1
PARP1	142	symbol	H. sapiens	142	H. sapiens	1	0	0	1	1	1	1	0	0	1	1	1	1	1	1	0	0	0	0	1
PTAFR	5724	symbol	H. sapiens	5724	H. sapiens	1	1	0	1	1	0	1	0	0	0	1	1	0	1	1	1	0	0	0	1
MAPK1	5594	symbol	H. sapiens	5594	H. sapiens	1	1	1	1	1	1	1	1	1	1	0	1	1	0	0	0	0	1	1	1
TYMS	7298	symbol	H. sapiens	7298	H. sapiens	1	0	0	0	1	0	0	0	0	1	0	0	0	0	0	0	0	0	1	1
CYP19A1	1588	symbol	H. sapiens	1588	H. sapiens	0	0	0	0	1	0	0	0	0	0	0	0	0	1	0	1	0	0	1	1
LRRK2	120892	symbol	H. sapiens	120892	H. sapiens	1	1	0	1	0	1	1	0	1	1	1	0	1	1	0	1	1	0	0	0
VDR	7421	symbol	H. sapiens	7421	H. sapiens	1	1	0	1	0	1	1	0	0	1	1	0	0	0	0	0	0	0	1	1
EGFR	1956	symbol	H. sapiens	1956	H. sapiens	1	1	1	1	1	1	1	0	1	1	1	1	1	1	1	1	0	0	1	1
PSEN2	5664	symbol	H. sapiens	5664	H. sapiens	0	0	0	0	0	1	0	0	1	0	0	0	0	0	0	0	0	0	0	0
PPOX	5498	symbol	H. sapiens	5498	H. sapiens	0	0	0	0	0	0	0	0	0	0	0	0	0	0	0	0	0	0	0	0
MAPK8	5599	symbol	H. sapiens	5599	H. sapiens	0	1	1	1	0	1	1	1	1	1	1	1	0	0	1	0	0	0	0	1
AKR1B1	231	symbol	H. sapiens	231	H. sapiens	0	0	0	0	0	0	0	0	0	1	0	1	0	0	0	1	0	0	0	0
MCL1	4170	symbol	H. sapiens	4170	H. sapiens	0	0	0	1	0	1	1	0	0	0	1	1	0	0	0	0	1	0	0	0
PYGL	5836	symbol	H. sapiens	5836	H. sapiens	0	0	0	0	0	1	0	0	0	0	0	0	0	0	0	0	0	0	0	0
PTK2	5747	symbol	H. sapiens	5747	H. sapiens	1	0	1	1	0	1	1	0	0	0	0	1	0	0	1	0	1	1	0	1
KDR	3791	symbol	H. sapiens	3791	H. sapiens	0	0	0	1	1	1	1	0	0	0	1	0	0	0	0	0	0	1	1	1
MAPK14	1432	symbol	H. sapiens	1432	H. sapiens	1	1	1	1	0	1	1	1	1	1	0	1	1	0	1	1	0	1	0	1
PTGS2	5743	symbol	H. sapiens	5743	H. sapiens	1	1	1	1	1	1	1	0	1	1	1	1	1	1	0	1	0	0	0	0
MAPK10	5602	symbol	H. sapiens	5602	H. sapiens	0	0	1	1	0	1	1	1	1	0	0	0	0	0	0	0	0	0	0	1
CA2	760	symbol	H. sapiens	760	H. sapiens	1	0	0	0	0	0	0	0	1	0	0	0	0	0	0	0	0	0	1	0
CA1	759	symbol	H. sapiens	759	H. sapiens	0	0	0	0	0	0	0	0	0	0	0	0	0	0	0	0	0	0	0	0
CA4	762	symbol	H. sapiens	762	H. sapiens	0	0	0	0	0	0	1	0	0	0	0	0	0	0	0	0	0	0	0	0
GSK3B	2932	symbol	H. sapiens	2932	H. sapiens	1	1	1	1	0	1	1	0	1	0	0	0	1	0	1	1	1	0	0	1
CDK1	983	symbol	H. sapiens	983	H. sapiens	0	1	1	1	0	1	0	1	0	1	0	0	1	0	0	0	0	1	0	0
EPHX1	2052	symbol	H. sapiens	2052	H. sapiens	0	0	0	0	0	1	0	0	0	0	0	0	0	0	0	0	0	0	1	1
CNR1	1268	symbol	H. sapiens	1268	H. sapiens	0	0	0	1	0	0	1	0	1	1	1	0	1	1	0	1	0	0	0	1
HSD11B1	3290	symbol	H. sapiens	3290	H. sapiens	0	0	0	0	0	0	0	0	0	0	0	0	0	0	0	0	0	0	1	0
MDM2	4193	symbol	H. sapiens	4193	H. sapiens	1	1	1	1	1	1	0	0	0	1	0	1	1	1	0	0	1	1	1	1
PTGS1	5742	symbol	H. sapiens	5742	H. sapiens	0	0	0	0	0	0	0	0	0	1	0	0	0	1	0	0	0	0	0	1
TERT	7015	symbol	H. sapiens	7015	H. sapiens	0	0	1	1	0	0	0	0	0	1	1	0	1	0	0	0	0	0	1	1
JAK3	3718	symbol	H. sapiens	3718	H. sapiens	1	0	1	1	0	1	0	0	0	0	0	0	0	0	0	0	0	0	0	1
CES1	1066	symbol	H. sapiens	1066	H. sapiens	0	1	0	0	1	0	0	0	0	0	0	0	0	0	0	1	0	0	0	0
TYK2	7297	symbol	H. sapiens	7297	H. sapiens	1	0	1	1	0	1	1	0	0	0	0	0	1	0	0	0	0	0	0	1
FGFR2	2263	symbol	H. sapiens	2263	H. sapiens	0	1	1	1	1	0	1	0	0	0	0	0	0	0	0	1	1	1	1	1
CASP1	834	symbol	H. sapiens	834	H. sapiens	0	1	0	0	0	1	0	0	0	1	1	1	0	0	1	0	1	0	0	1
CASR	846	symbol	H. sapiens	846	H. sapiens	0	1	0	1	0	1	1	0	1	1	0	0	1	1	1	1	0	0	1	0
MMP1	4312	symbol	H. sapiens	4312	H. sapiens	0	0	1	0	0	1	0	0	0	0	0	1	0	0	0	0	0	0	0	0
FLT3	2322	symbol	H. sapiens	2322	H. sapiens	1	1	1	1	1	0	1	0	0	0	0	0	0	0	0	0	0	0	0	1
CDK2	1017	symbol	H. sapiens	1017	H. sapiens	1	0	1	1	0	1	0	1	0	0	0	1	0	0	0	0	1	0	0	1
GRM5	2915	symbol	H. sapiens	2915	H. sapiens	1	0	0	1	0	1	1	0	1	0	0	0	0	0	1	0	0	0	0	1
GABRB3	2562	symbol	H. sapiens	2562	H. sapiens	1	1	0	0	0	0	1	0	0	0	0	0	0	0	0	0	0	0	0	0
GABRA2	2555	symbol	H. sapiens	2555	H. sapiens	0	0	0	0	0	0	1	0	0	0	0	0	0	0	0	0	0	0	0	0
KCNJ11	3767	symbol	H. sapiens	3767	H. sapiens	0	0	0	0	1	1	1	0	0	0	0	0	1	0	0	1	0	1	0	0
ABCB1	5243	symbol	H. sapiens	5243	H. sapiens	0	0	1	0	0	0	0	0	0	0	0	1	0	1	0	1	0	0	0	0
MTNR1B	4544	symbol	H. sapiens	4544	H. sapiens	0	0	0	0	0	0	1	0	0	0	1	0	1	1	0	1	0	0	0	0
AKR1C3	8644	symbol	H. sapiens	8644	H. sapiens	1	1	0	1	1	1	0	0	0	1	1	1	0	0	0	1	0	0	0	0
AURKA	6790	symbol	H. sapiens	6790	H. sapiens	0	0	0	1	0	1	1	1	0	0	0	0	0	0	1	1	1	0	0	1
IGF1R	3480	symbol	H. sapiens	3480	H. sapiens	1	1	1	1	1	1	1	1	0	1	0	1	0	0	0	1	0	1	0	1
INSR	3643	symbol	H. sapiens	3643	H. sapiens	1	0	0	1	1	1	1	0	1	0	0	0	0	1	0	1	1	1	0	1
FGFR1	2260	symbol	H. sapiens	2260	H. sapiens	0	0	1	1	0	0	1	0	0	0	0	0	0	1	0	1	1	1	1	1
CYP11B2	1585	symbol	H. sapiens	1585	H. sapiens	1	0	0	0	0	0	0	0	0	1	0	0	0	1	0	1	0	0	0	0
PIK3CA	5290	symbol	H. sapiens	5290	H. sapiens	1	0	1	1	1	1	1	1	1	1	1	1	1	1	0	1	0	0	0	1
PDE10A	10846	symbol	H. sapiens	10846	H. sapiens	0	0	0	0	0	1	1	0	0	0	0	0	0	0	0	0	0	0	0	0
DHODH	1723	symbol	H. sapiens	1723	H. sapiens	0	0	0	0	0	0	0	0	0	0	0	0	0	0	0	0	0	0	0	0
CHEK1	1111	symbol	H. sapiens	1111	H. sapiens	1	1	1	1	0	1	0	0	0	0	0	1	0	0	0	0	1	0	0	0
HRH3	11255	symbol	H. sapiens	11255	H. sapiens	1	0	0	0	0	0	1	0	0	0	0	0	0	0	0	0	0	0	0	0
BRD4	23476	symbol	H. sapiens	23476	H. sapiens	0	0	0	1	0	0	0	1	0	0	0	0	0	0	0	0	0	0	0	1
CDK5R1	8851	symbol	H. sapiens	8851	H. sapiens	1	0	0	1	0	0	1	0	1	0	1	0	1	0	1	0	0	0	0	0
CASP3	836	symbol	H. sapiens	836	H. sapiens	1	1	1	1	1	1	0	0	1	1	1	1	0	0	0	0	1	1	1	1
CASP6	839	symbol	H. sapiens	839	H. sapiens	1	1	0	0	0	1	0	0	0	0	1	0	0	0	0	0	1	0	0	1
CASP7	840	symbol	H. sapiens	840	H. sapiens	1	1	1	0	0	1	0	0	1	0	1	0	0	0	0	0	0	1	0	0
ALOX12	239	symbol	H. sapiens	239	H. sapiens	0	0	0	0	0	1	0	0	0	0	0	0	0	0	0	0	0	0	0	0
CASP8	841	symbol	H. sapiens	841	H. sapiens	0	1	1	1	0	1	1	0	1	1	1	1	0	0	0	0	1	1	0	1
NR4A1	3164	symbol	H. sapiens	3164	H. sapiens	1	0	1	1	0	0	1	0	0	0	1	0	1	1	0	0	0	1	1	0
CCNA1	8900	symbol	H. sapiens	8900	H. sapiens	0	0	1	0	0	0	0	1	0	0	0	0	0	0	0	0	0	0	0	1
CDK5	1020	symbol	H. sapiens	1020	H. sapiens	1	0	0	1	0	0	1	0	1	0	1	0	1	0	0	1	1	1	0	1
GABRA3	2556	symbol	H. sapiens	2556	H. sapiens	0	0	0	0	0	0	1	0	0	0	0	0	0	0	0	0	0	0	0	0
GABRG2	2566	symbol	H. sapiens	2566	H. sapiens	1	1	0	0	0	0	1	0	1	0	0	0	0	0	0	0	0	0	0	0
KCNQ1	3784	symbol	H. sapiens	3784	H. sapiens	1	1	0	0	0	0	1	0	1	0	0	1	0	1	1	1	0	1	0	1
PSENEN	55851	symbol	H. sapiens	55851	H. sapiens	0	0	0	0	0	0	0	0	1	0	0	0	0	0	0	0	1	0	0	0
TNNT2	7139	symbol	H. sapiens	7139	H. sapiens	0	0	0	0	0	0	0	0	0	1	0	0	0	1	0	1	0	1	1	0
NCSTN	23385	symbol	H. sapiens	23385	H. sapiens	1	1	0	0	0	0	0	0	1	1	0	0	0	0	0	1	1	0	0	0
CCNB1	891	symbol	H. sapiens	891	H. sapiens	0	0	0	0	0	1	0	1	0	0	0	0	0	0	1	0	0	0	0	1
CCNA2	890	symbol	H. sapiens	890	H. sapiens	1	1	1	1	0	0	0	1	0	0	0	0	0	0	1	0	1	0	0	1
CCNE1	898	symbol	H. sapiens	898	H. sapiens	0	0	1	1	0	0	0	1	0	0	0	1	0	0	1	0	0	0	0	0
GABRA1	2554	symbol	H. sapiens	2554	H. sapiens	0	0	0	0	0	0	1	0	0	0	0	0	0	0	0	0	0	0	0	0
GABRA5	2558	symbol	H. sapiens	2558	H. sapiens	0	0	0	0	0	0	1	0	1	0	0	0	0	0	0	0	0	0	0	0
TNNI3	7137	symbol	H. sapiens	7137	H. sapiens	0	0	0	1	0	1	0	0	0	0	0	0	0	1	1	0	1	1	1	0
APH1A	51107	symbol	H. sapiens	51107	H. sapiens	0	0	0	0	0	0	0	0	1	0	0	0	0	0	0	0	1	0	0	0
PSEN1	5663	symbol	H. sapiens	5663	H. sapiens	1	0	1	1	0	1	1	0	1	1	1	0	1	0	0	0	1	1	1	1

## Sheet: Enrichment-HA and Liver injury
GroupID	Category	Term	Description	LogP	Log(q-value)	Genes	Symbols	InTerm_InList
1_Summary	GO Biological Processes	GO:0071417	cellular response to organonitrogen compound	-34.4727	-30.126	142,760,836,839,840,890,1020,1111,1584,1585,2562,2566,2915,2932,3164,3480,3643,3716,3717,3718,3753,3784,4193,4780,5290,5468,5594,5663,5724,5743,5747,7297,120892,1017,1432,1956,2099,2322,2908,4306,5241,5292,5467,7298,7421,8644	PARP1,CA2,CASP3,CASP6,CASP7,CCNA2,CDK5,CHEK1,CYP11B1,CYP11B2,GABRB3,GABRG2,GRM5,GSK3B,NR4A1,IGF1R,INSR,JAK1,JAK2,JAK3,KCNE1,KCNQ1,MDM2,NFE2L2,PIK3CA,PPARG,MAPK1,PSEN1,PTAFR,PTGS2,PTK2,TYK2,LRRK2,CDK2,MAPK14,EGFR,ESR1,FLT3,NR3C1,NR3C2,PGR,PIM1,PPARD,TYMS,VDR,AKR1C3	46/-
1_Member	GO Biological Processes	GO:0071417	cellular response to organonitrogen compound	-34.4727	-30.126	142,760,836,839,840,890,1020,1111,1584,1585,2562,2566,2915,2932,3164,3480,3643,3716,3717,3718,3753,3784,4193,4780,5290,5468,5594,5663,5724,5743,5747,7297,120892	PARP1,CA2,CASP3,CASP6,CASP7,CCNA2,CDK5,CHEK1,CYP11B1,CYP11B2,GABRB3,GABRG2,GRM5,GSK3B,NR4A1,IGF1R,INSR,JAK1,JAK2,JAK3,KCNE1,KCNQ1,MDM2,NFE2L2,PIK3CA,PPARG,MAPK1,PSEN1,PTAFR,PTGS2,PTK2,TYK2,LRRK2	33/507
1_Member	GO Biological Processes	GO:1901699	cellular response to nitrogen compound	-33.9918	-29.9461	142,760,836,839,840,890,1017,1020,1111,1584,1585,2562,2566,2915,2932,3164,3480,3643,3716,3717,3718,3753,3784,4193,4780,5290,5468,5594,5663,5724,5743,5747,7297,120892	PARP1,CA2,CASP3,CASP6,CASP7,CCNA2,CDK2,CDK5,CHEK1,CYP11B1,CYP11B2,GABRB3,GABRG2,GRM5,GSK3B,NR4A1,IGF1R,INSR,JAK1,JAK2,JAK3,KCNE1,KCNQ1,MDM2,NFE2L2,PIK3CA,PPARG,MAPK1,PSEN1,PTAFR,PTGS2,PTK2,TYK2,LRRK2	34/582
1_Member	GO Biological Processes	GO:0009725	response to hormone	-30.816	-27.0714	142,760,836,890,1432,1584,1585,1956,2099,2322,2908,2932,3164,3480,3643,3716,3717,3718,3784,4193,4306,4780,5241,5290,5292,5467,5468,5594,5724,5743,5747,7297,7298,7421,8644	PARP1,CA2,CASP3,CCNA2,MAPK14,CYP11B1,CYP11B2,EGFR,ESR1,FLT3,NR3C1,GSK3B,NR4A1,IGF1R,INSR,JAK1,JAK2,JAK3,KCNQ1,MDM2,NR3C2,NFE2L2,PGR,PIK3CA,PIM1,PPARD,PPARG,MAPK1,PTAFR,PTGS2,PTK2,TYK2,TYMS,VDR,AKR1C3	35/795
1_Member	GO Biological Processes	GO:0032870	cellular response to hormone stimulus	-28.2788	-24.631	142,760,890,1584,1585,1956,2099,2322,2908,2932,3164,3480,3643,3716,3717,3718,4193,4306,4780,5241,5290,5292,5467,5468,5594,5747,7297,7421,8644	PARP1,CA2,CCNA2,CYP11B1,CYP11B2,EGFR,ESR1,FLT3,NR3C1,GSK3B,NR4A1,IGF1R,INSR,JAK1,JAK2,JAK3,MDM2,NR3C2,NFE2L2,PGR,PIK3CA,PIM1,PPARD,PPARG,MAPK1,PTK2,TYK2,VDR,AKR1C3	29/514
1_Member	GO Biological Processes	GO:0043434	response to peptide hormone	-21.4939	-18.2263	142,760,890,1432,1584,1585,2932,3164,3480,3643,3716,3717,3718,3784,4193,4780,5290,5468,5594,5743,5747,7297	PARP1,CA2,CCNA2,MAPK14,CYP11B1,CYP11B2,GSK3B,NR4A1,IGF1R,INSR,JAK1,JAK2,JAK3,KCNQ1,MDM2,NFE2L2,PIK3CA,PPARG,MAPK1,PTGS2,PTK2,TYK2	22/380
1_Member	GO Biological Processes	GO:0071375	cellular response to peptide hormone stimulus	-20.8367	-17.6039	142,760,890,1584,1585,2932,3164,3480,3643,3716,3717,3718,4193,4780,5290,5468,5594,5747,7297	PARP1,CA2,CCNA2,CYP11B1,CYP11B2,GSK3B,NR4A1,IGF1R,INSR,JAK1,JAK2,JAK3,MDM2,NFE2L2,PIK3CA,PPARG,MAPK1,PTK2,TYK2	19/248
2_Summary	GO Biological Processes	GO:0071407	cellular response to organic cyclic compound	-32.5256	-28.656	836,839,840,841,846,890,983,1066,1111,1956,2099,2322,2562,2566,2908,2932,3480,3717,3753,3784,4193,4306,5241,5292,5467,5594,5724,5743,7421,8644,120892,834,1432,2263,5599	CASP3,CASP6,CASP7,CASP8,CASR,CCNA2,CDK1,CES1,CHEK1,EGFR,ESR1,FLT3,GABRB3,GABRG2,NR3C1,GSK3B,IGF1R,JAK2,KCNE1,KCNQ1,MDM2,NR3C2,PGR,PIM1,PPARD,MAPK1,PTAFR,PTGS2,VDR,AKR1C3,LRRK2,CASP1,MAPK14,FGFR2,MAPK8	35/-
2_Member	GO Biological Processes	GO:0071407	cellular response to organic cyclic compound	-32.5256	-28.656	836,839,840,841,846,890,983,1066,1111,1956,2099,2322,2562,2566,2908,2932,3480,3717,3753,3784,4193,4306,5241,5292,5467,5594,5724,5743,7421,8644,120892	CASP3,CASP6,CASP7,CASP8,CASR,CCNA2,CDK1,CES1,CHEK1,EGFR,ESR1,FLT3,GABRB3,GABRG2,NR3C1,GSK3B,IGF1R,JAK2,KCNE1,KCNQ1,MDM2,NR3C2,PGR,PIM1,PPARD,MAPK1,PTAFR,PTGS2,VDR,AKR1C3,LRRK2	31/467
2_Member	GO Biological Processes	GO:0071396	cellular response to lipid	-19.5599	-16.3593	834,840,846,890,1066,1432,1956,2099,2263,2322,2908,2932,3480,3717,4306,5241,5292,5467,5594,5599,5724,7421,8644	CASP1,CASP7,CASR,CCNA2,CES1,MAPK14,EGFR,ESR1,FGFR2,FLT3,NR3C1,GSK3B,IGF1R,JAK2,NR3C2,PGR,PIM1,PPARD,MAPK1,MAPK8,PTAFR,VDR,AKR1C3	23/536
3_Summary	KEGG Pathway	hsa05200	Pathways in cancer	-27.8258	-24.2572	836,840,841,890,898,1017,1956,2099,2260,2263,2322,2932,3480,3716,3717,3718,4193,4312,4780,5290,5292,5467,5468,5594,5599,5602,5743,5747,7015,983,1020,1025,1111,1432,3643,3791,6790,7297,9020,23476,120892,3164,4170,142,846,2908,2554,2555,2556,2558,2562,2566,4306,7421,891,8644,5724,1268,5663,2915	CASP3,CASP7,CASP8,CCNA2,CCNE1,CDK2,EGFR,ESR1,FGFR1,FGFR2,FLT3,GSK3B,IGF1R,JAK1,JAK2,JAK3,MDM2,MMP1,NFE2L2,PIK3CA,PIM1,PPARD,PPARG,MAPK1,MAPK8,MAPK10,PTGS2,PTK2,TERT,CDK1,CDK5,CDK9,CHEK1,MAPK14,INSR,KDR,AURKA,TYK2,MAP3K14,BRD4,LRRK2,NR4A1,MCL1,PARP1,CASR,NR3C1,GABRA1,GABRA2,GABRA3,GABRA5,GABRB3,GABRG2,NR3C2,VDR,CCNB1,AKR1C3,PTAFR,CNR1,PSEN1,GRM5	60/-
3_Member	KEGG Pathway	hsa05200	Pathways in cancer	-27.8258	-24.2572	836,840,841,890,898,1017,1956,2099,2260,2263,2322,2932,3480,3716,3717,3718,4193,4312,4780,5290,5292,5467,5468,5594,5599,5602,5743,5747,7015	CASP3,CASP7,CASP8,CCNA2,CCNE1,CDK2,EGFR,ESR1,FGFR1,FGFR2,FLT3,GSK3B,IGF1R,JAK1,JAK2,JAK3,MDM2,MMP1,NFE2L2,PIK3CA,PIM1,PPARD,PPARG,MAPK1,MAPK8,MAPK10,PTGS2,PTK2,TERT	29/533
3_Member	GO Molecular Functions	GO:0004672	protein kinase activity	-25.7216	-22.2199	983,1017,1020,1025,1111,1432,1956,2260,2263,2322,2932,3480,3643,3716,3717,3718,3791,5290,5292,5594,5599,5602,5747,6790,7297,9020,23476,120892	CDK1,CDK2,CDK5,CDK9,CHEK1,MAPK14,EGFR,FGFR1,FGFR2,FLT3,GSK3B,IGF1R,INSR,JAK1,JAK2,JAK3,KDR,PIK3CA,PIM1,MAPK1,MAPK8,MAPK10,PTK2,AURKA,TYK2,MAP3K14,BRD4,LRRK2	28/564
3_Member	GO Biological Processes	GO:0016310	phosphorylation	-24.6955	-21.2518	898,983,1017,1020,1025,1111,1432,1956,2260,2263,2322,2932,3480,3643,3716,3717,3718,3791,5290,5292,5594,5599,5602,5747,6790,7297,120892	CCNE1,CDK1,CDK2,CDK5,CDK9,CHEK1,MAPK14,EGFR,FGFR1,FGFR2,FLT3,GSK3B,IGF1R,INSR,JAK1,JAK2,JAK3,KDR,PIK3CA,PIM1,MAPK1,MAPK8,MAPK10,PTK2,AURKA,TYK2,LRRK2	27/547
3_Member	GO Biological Processes	GO:0006468	protein phosphorylation	-24.57	-21.1775	898,983,1017,1020,1025,1111,1432,1956,2260,2263,2322,2932,3480,3643,3716,3717,3718,3791,5292,5594,5599,5602,5747,6790,7297,120892	CCNE1,CDK1,CDK2,CDK5,CDK9,CHEK1,MAPK14,EGFR,FGFR1,FGFR2,FLT3,GSK3B,IGF1R,INSR,JAK1,JAK2,JAK3,KDR,PIM1,MAPK1,MAPK8,MAPK10,PTK2,AURKA,TYK2,LRRK2	26/489
3_Member	GO Molecular Functions	GO:0016301	kinase activity	-24.0146	-20.6678	898,983,1017,1020,1025,1111,1432,1956,2260,2263,2322,2932,3480,3643,3716,3717,3718,3791,5290,5292,5594,5599,5602,5747,6790,7297,9020,23476,120892	CCNE1,CDK1,CDK2,CDK5,CDK9,CHEK1,MAPK14,EGFR,FGFR1,FGFR2,FLT3,GSK3B,IGF1R,INSR,JAK1,JAK2,JAK3,KDR,PIK3CA,PIM1,MAPK1,MAPK8,MAPK10,PTK2,AURKA,TYK2,MAP3K14,BRD4,LRRK2	29/726
3_Member	GO Molecular Functions	GO:0016773	phosphotransferase activity, alcohol group as acceptor	-23.6402	-20.3349	983,1017,1020,1025,1111,1432,1956,2260,2263,2322,2932,3480,3643,3716,3717,3718,3791,5290,5292,5594,5599,5602,5747,6790,7297,9020,23476,120892	CDK1,CDK2,CDK5,CDK9,CHEK1,MAPK14,EGFR,FGFR1,FGFR2,FLT3,GSK3B,IGF1R,INSR,JAK1,JAK2,JAK3,KDR,PIK3CA,PIM1,MAPK1,MAPK8,MAPK10,PTK2,AURKA,TYK2,MAP3K14,BRD4,LRRK2	28/672
3_Member	GO Biological Processes	GO:0018193	peptidyl-amino acid modification	-18.631	-15.4603	983,1017,1020,1111,1432,1956,2260,2263,2322,2932,3480,3643,3716,3717,3718,3791,4193,5594,5599,5747,6790,120892	CDK1,CDK2,CDK5,CHEK1,MAPK14,EGFR,FGFR1,FGFR2,FLT3,GSK3B,IGF1R,INSR,JAK1,JAK2,JAK3,KDR,MDM2,MAPK1,MAPK8,PTK2,AURKA,LRRK2	22/516
3_Member	KEGG Pathway	hsa04151	PI3K-Akt signaling pathway	-17.7316	-14.6153	898,1017,1956,2260,2263,2322,2932,3164,3480,3643,3716,3717,3718,3791,4170,4193,5290,5594,5747	CCNE1,CDK2,EGFR,FGFR1,FGFR2,FLT3,GSK3B,NR4A1,IGF1R,INSR,JAK1,JAK2,JAK3,KDR,MCL1,MDM2,PIK3CA,MAPK1,PTK2	19/362
3_Member	GO Biological Processes	GO:0018108	peptidyl-tyrosine phosphorylation	-16.075	-13.0505	1956,2260,2263,2322,3480,3643,3716,3717,3718,3791,5747	EGFR,FGFR1,FGFR2,FLT3,IGF1R,INSR,JAK1,JAK2,JAK3,KDR,PTK2	11/65
3_Member	GO Biological Processes	GO:0018212	peptidyl-tyrosine modification	-15.9201	-12.9536	1956,2260,2263,2322,3480,3643,3716,3717,3718,3791,5747	EGFR,FGFR1,FGFR2,FLT3,IGF1R,INSR,JAK1,JAK2,JAK3,KDR,PTK2	11/67
3_Member	GO Biological Processes	GO:0046777	protein autophosphorylation	-14.8156	-11.9378	1956,2260,2263,2322,2932,3480,3643,3717,3791,5292,5747,6790,120892	EGFR,FGFR1,FGFR2,FLT3,GSK3B,IGF1R,INSR,JAK2,KDR,PIM1,PTK2,AURKA,LRRK2	13/155
3_Member	GO Biological Processes	GO:0070848	response to growth factor	-14.8074	-11.9378	142,836,846,890,1432,1956,2260,2263,2322,2908,3164,3480,3643,3791,4193,5290,5468,5594,5747	PARP1,CASP3,CASR,CCNA2,MAPK14,EGFR,FGFR1,FGFR2,FLT3,NR3C1,NR4A1,IGF1R,INSR,KDR,MDM2,PIK3CA,PPARG,MAPK1,PTK2	19/522
3_Member	GO Biological Processes	GO:0071363	cellular response to growth factor stimulus	-14.0955	-11.2802	142,836,846,890,1432,1956,2260,2263,2322,2908,3164,3480,3643,3791,4193,5290,5468,5747	PARP1,CASP3,CASR,CCNA2,MAPK14,EGFR,FGFR1,FGFR2,FLT3,NR3C1,NR4A1,IGF1R,INSR,KDR,MDM2,PIK3CA,PPARG,PTK2	18/490
3_Member	GO Biological Processes	GO:0007169	cell surface receptor protein tyrosine kinase signaling pathway	-13.9506	-11.1721	836,1432,1956,2260,2263,2322,2932,3480,3643,3716,3717,3718,3791,5290,5594,5747,7297	CASP3,MAPK14,EGFR,FGFR1,FGFR2,FLT3,GSK3B,IGF1R,INSR,JAK1,JAK2,JAK3,KDR,PIK3CA,MAPK1,PTK2,TYK2	17/423
3_Member	GO Molecular Functions	GO:0004713	protein tyrosine kinase activity	-13.8918	-11.1282	1956,2260,2263,2322,3480,3643,3716,3717,3718,3791,5747,7297	EGFR,FGFR1,FGFR2,FLT3,IGF1R,INSR,JAK1,JAK2,JAK3,KDR,PTK2,TYK2	12/138
3_Member	GO Biological Processes	GO:0007167	enzyme-linked receptor protein signaling pathway	-13.4886	-10.7546	142,836,1432,1956,2260,2263,2322,2932,3480,3643,3716,3717,3718,3791,5290,5468,5594,5747,7297	PARP1,CASP3,MAPK14,EGFR,FGFR1,FGFR2,FLT3,GSK3B,IGF1R,INSR,JAK1,JAK2,JAK3,KDR,PIK3CA,PPARG,MAPK1,PTK2,TYK2	19/618
3_Member	GO Cellular Components	GO:0043235	receptor complex	-13.333	-10.6297	1956,2260,2263,2322,2554,2555,2556,2558,2562,2566,3480,3643,3717,3791,4306,5468,7297,7421	EGFR,FGFR1,FGFR2,FLT3,GABRA1,GABRA2,GABRA3,GABRA5,GABRB3,GABRG2,IGF1R,INSR,JAK2,KDR,NR3C2,PPARG,TYK2,VDR	18/543
3_Member	KEGG Pathway	hsa04068	FoxO signaling pathway	-12.5227	-9.8749	891,1017,1432,1956,3480,3643,4193,5290,5594,5599,5602	CCNB1,CDK2,MAPK14,EGFR,IGF1R,INSR,MDM2,PIK3CA,MAPK1,MAPK8,MAPK10	11/133
3_Member	KEGG Pathway	hsa04010	MAPK signaling pathway	-12.3994	-9.77699	836,1432,1956,2260,2263,2322,3164,3480,3643,3791,5594,5599,5602,9020	CASP3,MAPK14,EGFR,FGFR1,FGFR2,FLT3,NR4A1,IGF1R,INSR,KDR,MAPK1,MAPK8,MAPK10,MAP3K14	14/300
3_Member	KEGG Pathway	hsa01522	Endocrine resistance	-12.304	-9.70543	1432,1956,2099,3480,4193,5290,5594,5599,5602,5747	MAPK14,EGFR,ESR1,IGF1R,MDM2,PIK3CA,MAPK1,MAPK8,MAPK10,PTK2	10/99
3_Member	KEGG Pathway	hsa01521	EGFR tyrosine kinase inhibitor resistance	-11.5493	-9.04146	1956,2263,2932,3480,3716,3717,3791,5290,5594	EGFR,FGFR2,GSK3B,IGF1R,JAK1,JAK2,KDR,PIK3CA,MAPK1	9/80
3_Member	GO Biological Processes	GO:0051897	positive regulation of phosphatidylinositol 3-kinase/protein kinase B signal transduction	-10.898	-8.50555	1956,2260,2322,3480,3643,3717,3791,5290,5467,5747,8644	EGFR,FGFR1,FLT3,IGF1R,INSR,JAK2,KDR,PIK3CA,PPARD,PTK2,AKR1C3	11/187
3_Member	KEGG Pathway	hsa04550	Signaling pathways regulating pluripotency of stem cells	-10.6596	-8.31007	1432,2260,2263,2932,3480,3716,3717,3718,5290,5594	MAPK14,FGFR1,FGFR2,GSK3B,IGF1R,JAK1,JAK2,JAK3,PIK3CA,MAPK1	10/144
3_Member	KEGG Pathway	hsa05205	Proteoglycans in cancer	-10.4895	-8.17212	836,1432,1956,2099,2260,3480,3791,4193,5290,5594,5747	CASP3,MAPK14,EGFR,ESR1,FGFR1,IGF1R,KDR,MDM2,PIK3CA,MAPK1,PTK2	11/204
3_Member	GO Biological Processes	GO:0051338	regulation of transferase activity	-10.2106	-7.9502	890,891,898,1956,2260,2263,2322,2932,3480,3643,3717,3791,5468,5594,5747,120892	CCNA2,CCNB1,CCNE1,EGFR,FGFR1,FGFR2,FLT3,GSK3B,IGF1R,INSR,JAK2,KDR,PPARG,MAPK1,PTK2,LRRK2	16/623
3_Member	KEGG Pathway	hsa04014	Ras signaling pathway	-9.77206	-7.55567	1956,2260,2263,2322,3480,3643,3791,5290,5594,5599,5602	EGFR,FGFR1,FGFR2,FLT3,IGF1R,INSR,KDR,PIK3CA,MAPK1,MAPK8,MAPK10	11/238
3_Member	GO Biological Processes	GO:0043549	regulation of kinase activity	-9.2619	-7.10551	890,891,898,1956,2260,2263,2322,3480,3643,3717,3791,5468,5747,120892	CCNA2,CCNB1,CCNE1,EGFR,FGFR1,FGFR2,FLT3,IGF1R,INSR,JAK2,KDR,PPARG,PTK2,LRRK2	14/517
3_Member	GO Molecular Functions	GO:0004714	transmembrane receptor protein tyrosine kinase activity	-9.19822	-7.05562	1956,2260,2263,2322,3480,3643,3791	EGFR,FGFR1,FGFR2,FLT3,IGF1R,INSR,KDR	7/60
3_Member	GO Biological Processes	GO:0051896	regulation of phosphatidylinositol 3-kinase/protein kinase B signal transduction	-9.14076	-7.01414	1956,2260,2322,3480,3643,3717,3791,5290,5467,5747,8644	EGFR,FGFR1,FLT3,IGF1R,INSR,JAK2,KDR,PIK3CA,PPARD,PTK2,AKR1C3	11/273
3_Member	GO Biological Processes	GO:0040017	positive regulation of locomotion	-9.06989	-6.9587	841,846,1956,2260,3480,3643,3717,3791,4193,4780,5594,5724,5743,5747,7015	CASP8,CASR,EGFR,FGFR1,IGF1R,INSR,JAK2,KDR,MDM2,NFE2L2,MAPK1,PTAFR,PTGS2,PTK2,TERT	15/637
3_Member	KEGG Pathway	hsa04015	Rap1 signaling pathway	-9.00744	-6.90376	1268,1432,1956,2260,2263,3480,3643,3791,5290,5594	CNR1,MAPK14,EGFR,FGFR1,FGFR2,IGF1R,INSR,KDR,PIK3CA,MAPK1	10/212
3_Member	GO Biological Processes	GO:0030335	positive regulation of cell migration	-8.47962	-6.4415	841,1956,2260,3480,3643,3717,3791,4193,4780,5594,5724,5743,5747,7015	CASP8,EGFR,FGFR1,IGF1R,INSR,JAK2,KDR,MDM2,NFE2L2,MAPK1,PTAFR,PTGS2,PTK2,TERT	14/595
3_Member	GO Molecular Functions	GO:0019199	transmembrane receptor protein kinase activity	-8.34308	-6.3368	1956,2260,2263,2322,3480,3643,3791	EGFR,FGFR1,FGFR2,FLT3,IGF1R,INSR,KDR	7/79
3_Member	GO Biological Processes	GO:2000147	positive regulation of cell motility	-8.22656	-6.24156	841,1956,2260,3480,3643,3717,3791,4193,4780,5594,5724,5743,5747,7015	CASP8,EGFR,FGFR1,IGF1R,INSR,JAK2,KDR,MDM2,NFE2L2,MAPK1,PTAFR,PTGS2,PTK2,TERT	14/623
3_Member	GO Biological Processes	GO:0051347	positive regulation of transferase activity	-7.8413	-5.8977	1956,2260,2263,2322,3480,3643,3717,3791,5594,5747,120892	EGFR,FGFR1,FGFR2,FLT3,IGF1R,INSR,JAK2,KDR,MAPK1,PTK2,LRRK2	11/364
3_Member	GO Biological Processes	GO:0033674	positive regulation of kinase activity	-7.67673	-5.76617	1956,2260,2263,2322,3480,3643,3717,3791,5747,120892	EGFR,FGFR1,FGFR2,FLT3,IGF1R,INSR,JAK2,KDR,PTK2,LRRK2	10/292
3_Member	GO Biological Processes	GO:0010562	positive regulation of phosphorus metabolic process	-7.6466	-5.73921	1956,2260,2263,2322,3480,3643,3717,3791,5594,5663,5724,5743,5747,120892	EGFR,FGFR1,FGFR2,FLT3,IGF1R,INSR,JAK2,KDR,MAPK1,PSEN1,PTAFR,PTGS2,PTK2,LRRK2	14/693
3_Member	GO Biological Processes	GO:0045937	positive regulation of phosphate metabolic process	-7.6466	-5.73921	1956,2260,2263,2322,3480,3643,3717,3791,5594,5663,5724,5743,5747,120892	EGFR,FGFR1,FGFR2,FLT3,IGF1R,INSR,JAK2,KDR,MAPK1,PSEN1,PTAFR,PTGS2,PTK2,LRRK2	14/693
3_Member	GO Biological Processes	GO:0042327	positive regulation of phosphorylation	-7.36055	-5.49812	1956,2260,2263,2322,3480,3643,3717,3791,5594,5663,5743,5747,120892	EGFR,FGFR1,FGFR2,FLT3,IGF1R,INSR,JAK2,KDR,MAPK1,PSEN1,PTGS2,PTK2,LRRK2	13/614
3_Member	GO Biological Processes	GO:0043408	regulation of MAPK cascade	-6.9901	-5.18371	846,1956,2260,2263,2322,2915,3480,3643,3717,3791,5468,5594,120892	CASR,EGFR,FGFR1,FGFR2,FLT3,GRM5,IGF1R,INSR,JAK2,KDR,PPARG,MAPK1,LRRK2	13/661
3_Member	GO Biological Processes	GO:0071900	regulation of protein serine/threonine kinase activity	-6.96506	-5.16241	890,891,898,1956,2260,2322,3643,5468,120892	CCNA2,CCNB1,CCNE1,EGFR,FGFR1,FLT3,INSR,PPARG,LRRK2	9/262
3_Member	GO Biological Processes	GO:0045859	regulation of protein kinase activity	-6.85927	-5.06647	890,891,898,1956,2260,2322,3643,3717,5468,5747,120892	CCNA2,CCNB1,CCNE1,EGFR,FGFR1,FLT3,INSR,JAK2,PPARG,PTK2,LRRK2	11/455
3_Member	GO Biological Processes	GO:0043410	positive regulation of MAPK cascade	-6.74639	-4.96786	846,1956,2260,2263,2322,2915,3480,3643,3717,3791,120892	CASR,EGFR,FGFR1,FGFR2,FLT3,GRM5,IGF1R,INSR,JAK2,KDR,LRRK2	11/467
3_Member	GO Molecular Functions	GO:0019838	growth factor binding	-6.7237	-4.94981	1956,2260,2263,2322,3480,3643,3791	EGFR,FGFR1,FGFR2,FLT3,IGF1R,INSR,KDR	7/135
3_Member	GO Biological Processes	GO:0001934	positive regulation of protein phosphorylation	-5.90256	-4.22515	1956,2260,2322,3643,3717,3791,5594,5663,5743,5747,120892	EGFR,FGFR1,FLT3,INSR,JAK2,KDR,MAPK1,PSEN1,PTGS2,PTK2,LRRK2	11/569
3_Member	GO Biological Processes	GO:0043405	regulation of MAP kinase activity	-5.55598	-3.92359	1956,2260,2322,3643,5468,120892	EGFR,FGFR1,FLT3,INSR,PPARG,LRRK2	6/129
3_Member	GO Biological Processes	GO:0031401	positive regulation of protein modification process	-5.51685	-3.89029	1956,2260,2322,2932,3643,3717,3791,5594,5663,5743,5747,120892	EGFR,FGFR1,FLT3,GSK3B,INSR,JAK2,KDR,MAPK1,PSEN1,PTGS2,PTK2,LRRK2	12/755
3_Member	GO Biological Processes	GO:0043406	positive regulation of MAP kinase activity	-5.36266	-3.75392	1956,2260,2322,3643,120892	EGFR,FGFR1,FLT3,INSR,LRRK2	5/79
3_Member	GO Biological Processes	GO:0045860	positive regulation of protein kinase activity	-4.98633	-3.42279	1956,2260,2322,3643,3717,5747,120892	EGFR,FGFR1,FLT3,INSR,JAK2,PTK2,LRRK2	7/246
3_Member	GO Biological Processes	GO:0071902	positive regulation of protein serine/threonine kinase activity	-4.40967	-2.92508	1956,2260,2322,3643,120892	EGFR,FGFR1,FLT3,INSR,LRRK2	5/124
4_Summary	GO Biological Processes	GO:0048545	response to steroid hormone	-18.1974	-15.0548	142,836,1956,2099,2322,2908,3480,3717,4193,4306,5241,5290,5467,5594,5724,5743,7298,8644,3767,3791,3643,2263	PARP1,CASP3,EGFR,ESR1,FLT3,NR3C1,IGF1R,JAK2,MDM2,NR3C2,PGR,PIK3CA,PPARD,MAPK1,PTAFR,PTGS2,TYMS,AKR1C3,KCNJ11,KDR,INSR,FGFR2	22/-
4_Member	GO Biological Processes	GO:0048545	response to steroid hormone	-18.1974	-15.0548	142,836,1956,2099,2322,2908,3480,3717,4193,4306,5241,5290,5467,5594,5724,5743,7298,8644	PARP1,CASP3,EGFR,ESR1,FLT3,NR3C1,IGF1R,JAK2,MDM2,NR3C2,PGR,PIK3CA,PPARD,MAPK1,PTAFR,PTGS2,TYMS,AKR1C3	18/286
4_Member	GO Biological Processes	GO:0031960	response to corticosteroid	-13.1799	-10.4864	142,836,1956,2322,2908,3480,3717,5290,5724,5743,7298,8644	PARP1,CASP3,EGFR,FLT3,NR3C1,IGF1R,JAK2,PIK3CA,PTAFR,PTGS2,TYMS,AKR1C3	12/158
4_Member	GO Biological Processes	GO:0051384	response to glucocorticoid	-10.9076	-8.5103	836,1956,2322,2908,3480,3717,5290,5724,5743,7298	CASP3,EGFR,FLT3,NR3C1,IGF1R,JAK2,PIK3CA,PTAFR,PTGS2,TYMS	10/136
4_Member	GO Biological Processes	GO:1901654	response to ketone	-8.87082	-6.79127	142,1956,2908,3480,3717,3767,5290,5724,7298,8644	PARP1,EGFR,NR3C1,IGF1R,JAK2,KCNJ11,PIK3CA,PTAFR,TYMS,AKR1C3	10/219
4_Member	GO Biological Processes	GO:0071548	response to dexamethasone	-8.31146	-6.31109	1956,2908,3480,3717,5290,5724	EGFR,NR3C1,IGF1R,JAK2,PIK3CA,PTAFR	6/45
4_Member	GO Biological Processes	GO:0071384	cellular response to corticosteroid stimulus	-7.32649	-5.47253	1956,2322,2908,3480,3717,8644	EGFR,FLT3,NR3C1,IGF1R,JAK2,AKR1C3	6/65
4_Member	GO Biological Processes	GO:0071385	cellular response to glucocorticoid stimulus	-6.14926	-4.44003	1956,2322,2908,3480,3717	EGFR,FLT3,NR3C1,IGF1R,JAK2	5/55
4_Member	GO Biological Processes	GO:0071549	cellular response to dexamethasone stimulus	-5.81432	-4.14611	1956,2908,3480,3717	EGFR,NR3C1,IGF1R,JAK2	4/28
4_Member	GO Biological Processes	GO:0038083	peptidyl-tyrosine autophosphorylation	-5.01822	-3.44747	1956,3480,3791	EGFR,IGF1R,KDR	3/14
4_Member	GO Biological Processes	GO:1901655	cellular response to ketone	-4.71799	-3.1815	1956,2908,3480,3717,8644	EGFR,NR3C1,IGF1R,JAK2,AKR1C3	5/107
4_Member	GO Molecular Functions	GO:0042562	hormone binding	-3.74362	-2.34823	1956,2908,3480,3643	EGFR,NR3C1,IGF1R,INSR	4/92
4_Member	KEGG Pathway	hsa04144	Endocytosis	-2.1343	-0.908475	1956,2263,3480,4193	EGFR,FGFR2,IGF1R,MDM2	4/252
5_Summary	KEGG Pathway	hsa05417	Lipid and atherosclerosis	-17.3127	-14.2213	834,836,839,840,841,1432,2932,3717,4312,4780,5290,5468,5594,5599,5602,5747,142,4170,9020,3716,5743,7297,4193,240,1020,2915,3643,5663,5664,2099,891,983,1111,3718,5836,1956,2052,8644,120892,5292,7421,3767,846,3480,3791,7137,1017,239,5467,6790	CASP1,CASP3,CASP6,CASP7,CASP8,MAPK14,GSK3B,JAK2,MMP1,NFE2L2,PIK3CA,PPARG,MAPK1,MAPK8,MAPK10,PTK2,PARP1,MCL1,MAP3K14,JAK1,PTGS2,TYK2,MDM2,ALOX5,CDK5,GRM5,INSR,PSEN1,PSEN2,ESR1,CCNB1,CDK1,CHEK1,JAK3,PYGL,EGFR,EPHX1,AKR1C3,LRRK2,PIM1,VDR,KCNJ11,CASR,IGF1R,KDR,TNNI3,CDK2,ALOX12,PPARD,AURKA	50/-
5_Member	KEGG Pathway	hsa05417	Lipid and atherosclerosis	-17.3127	-14.2213	834,836,839,840,841,1432,2932,3717,4312,4780,5290,5468,5594,5599,5602,5747	CASP1,CASP3,CASP6,CASP7,CASP8,MAPK14,GSK3B,JAK2,MMP1,NFE2L2,PIK3CA,PPARG,MAPK1,MAPK8,MAPK10,PTK2	16/216
5_Member	KEGG Pathway	hsa04210	Apoptosis	-12.4151	-9.78439	142,836,839,840,841,4170,5290,5594,5599,5602,9020	PARP1,CASP3,CASP6,CASP7,CASP8,MCL1,PIK3CA,MAPK1,MAPK8,MAPK10,MAP3K14	11/136
5_Member	KEGG Pathway	hsa05167	Kaposi sarcoma-associated herpesvirus infection	-12.0603	-9.48438	836,841,1432,2932,3716,3717,5290,5594,5599,5602,5743,7297	CASP3,CASP8,MAPK14,GSK3B,JAK1,JAK2,PIK3CA,MAPK1,MAPK8,MAPK10,PTGS2,TYK2	12/196
5_Member	KEGG Pathway	hsa04625	C-type lectin receptor signaling pathway	-12.0428	-9.47423	834,841,1432,4193,5290,5594,5599,5602,5743,9020	CASP1,CASP8,MAPK14,MDM2,PIK3CA,MAPK1,MAPK8,MAPK10,PTGS2,MAP3K14	10/105
5_Member	KEGG Pathway	hsa05145	Toxoplasmosis	-11.7972	-9.25665	240,836,841,1432,3716,3717,5594,5599,5602,7297	ALOX5,CASP3,CASP8,MAPK14,JAK1,JAK2,MAPK1,MAPK8,MAPK10,TYK2	10/111
5_Member	KEGG Pathway	hsa04668	TNF signaling pathway	-11.491	-8.99551	836,840,841,1432,5290,5594,5599,5602,5743,9020	CASP3,CASP7,CASP8,MAPK14,PIK3CA,MAPK1,MAPK8,MAPK10,PTGS2,MAP3K14	10/119
5_Member	KEGG Pathway	hsa04657	IL-17 signaling pathway	-10.8607	-8.47299	836,841,1432,2932,4312,5594,5599,5602,5743	CASP3,CASP8,MAPK14,GSK3B,MMP1,MAPK1,MAPK8,MAPK10,PTGS2	9/95
5_Member	KEGG Pathway	hsa05010	Alzheimer disease	-10.8528	-8.46984	836,840,841,1020,2915,2932,3643,5290,5594,5599,5602,5663,5664,5743	CASP3,CASP7,CASP8,CDK5,GRM5,GSK3B,INSR,PIK3CA,MAPK1,MAPK8,MAPK10,PSEN1,PSEN2,PTGS2	14/391
5_Member	KEGG Pathway	hsa04917	Prolactin signaling pathway	-10.3215	-8.03927	1432,2099,2932,3717,5290,5594,5599,5602	MAPK14,ESR1,GSK3B,JAK2,PIK3CA,MAPK1,MAPK8,MAPK10	8/71
5_Member	KEGG Pathway	hsa05170	Human immunodeficiency virus 1 infection	-10.2877	-8.01523	836,841,891,983,1111,1432,5290,5594,5599,5602,5747	CASP3,CASP8,CCNB1,CDK1,CHEK1,MAPK14,PIK3CA,MAPK1,MAPK8,MAPK10,PTK2	11/213
5_Member	KEGG Pathway	hsa04932	Non-alcoholic fatty liver disease	-10.2864	-8.01523	836,840,841,1432,2932,3643,5290,5468,5599,5602	CASP3,CASP7,CASP8,MAPK14,GSK3B,INSR,PIK3CA,PPARG,MAPK8,MAPK10	10/157
5_Member	KEGG Pathway	hsa04217	Necroptosis	-10.2319	-7.968	142,834,841,3716,3717,3718,5599,5602,5836,7297	PARP1,CASP1,CASP8,JAK1,JAK2,JAK3,MAPK8,MAPK10,PYGL,TYK2	10/159
5_Member	KEGG Pathway	hsa05208	Chemical carcinogenesis - reactive oxygen species	-10.0119	-7.77576	1432,1956,2052,4780,5290,5594,5599,5602,5747,8644,9020	MAPK14,EGFR,EPHX1,NFE2L2,PIK3CA,MAPK1,MAPK8,MAPK10,PTK2,AKR1C3,MAP3K14	11/226
5_Member	KEGG Pathway	hsa05022	Pathways of neurodegeneration - multiple diseases	-9.64516	-7.43832	836,840,841,1020,1432,2915,2932,5594,5599,5602,5663,5664,5743,120892	CASP3,CASP7,CASP8,CDK5,MAPK14,GRM5,GSK3B,MAPK1,MAPK8,MAPK10,PSEN1,PSEN2,PTGS2,LRRK2	14/483
5_Member	KEGG Pathway	hsa04658	Th1 and Th2 cell differentiation	-9.40205	-7.22265	1432,3716,3717,3718,5594,5599,5602,7297	MAPK14,JAK1,JAK2,JAK3,MAPK1,MAPK8,MAPK10,TYK2	8/92
5_Member	KEGG Pathway	hsa04380	Osteoclast differentiation	-9.2826	-7.1234	1432,3716,5290,5468,5594,5599,5602,7297,9020	MAPK14,JAK1,PIK3CA,PPARG,MAPK1,MAPK8,MAPK10,TYK2,MAP3K14	9/142
5_Member	KEGG Pathway	hsa04933	AGE-RAGE signaling pathway in diabetic complications	-9.07499	-6.9587	836,1432,3717,5290,5292,5594,5599,5602	CASP3,MAPK14,JAK2,PIK3CA,PIM1,MAPK1,MAPK8,MAPK10	8/101
5_Member	KEGG Pathway	hsa04659	Th17 cell differentiation	-8.84147	-6.76658	1432,3716,3717,3718,5594,5599,5602,7297	MAPK14,JAK1,JAK2,JAK3,MAPK1,MAPK8,MAPK10,TYK2	8/108
5_Member	KEGG Pathway	hsa04620	Toll-like receptor signaling pathway	-8.80943	-6.73917	841,1432,3716,5290,5594,5599,5602,7297	CASP8,MAPK14,JAK1,PIK3CA,MAPK1,MAPK8,MAPK10,TYK2	8/109
5_Member	KEGG Pathway	hsa05171	Coronavirus disease - COVID-19	-8.52251	-6.47682	834,1432,1956,3716,4312,5290,5594,5599,5602,7297	CASP1,MAPK14,EGFR,JAK1,MMP1,PIK3CA,MAPK1,MAPK8,MAPK10,TYK2	10/238
5_Member	KEGG Pathway	hsa04722	Neurotrophin signaling pathway	-8.47647	-6.4415	1432,2932,5290,5594,5599,5602,5663,5664	MAPK14,GSK3B,PIK3CA,MAPK1,MAPK8,MAPK10,PSEN1,PSEN2	8/120
5_Member	KEGG Pathway	hsa04935	Growth hormone synthesis, secretion and action	-8.41945	-6.39701	1432,2932,3717,5290,5594,5599,5602,5747	MAPK14,GSK3B,JAK2,PIK3CA,MAPK1,MAPK8,MAPK10,PTK2	8/122
5_Member	KEGG Pathway	hsa05133	Pertussis	-8.38231	-6.36657	834,836,840,1432,5594,5599,5602	CASP1,CASP3,CASP7,MAPK14,MAPK1,MAPK8,MAPK10	7/78
5_Member	KEGG Pathway	hsa05152	Tuberculosis	-8.37236	-6.36009	836,841,1432,3716,3717,5594,5599,5602,7421	CASP3,CASP8,MAPK14,JAK1,JAK2,MAPK1,MAPK8,MAPK10,VDR	9/180
5_Member	KEGG Pathway	hsa05131	Shigellosis	-8.33434	-6.33004	834,1432,1956,2932,4193,5290,5594,5599,5602,5747	CASP1,MAPK14,EGFR,GSK3B,MDM2,PIK3CA,MAPK1,MAPK8,MAPK10,PTK2	10/249
5_Member	KEGG Pathway	hsa04930	Type II diabetes mellitus	-8.19356	-6.21232	3643,3767,5290,5594,5599,5602	INSR,KCNJ11,PIK3CA,MAPK1,MAPK8,MAPK10	6/47
5_Member	KEGG Pathway	hsa04621	NOD-like receptor signaling pathway	-8.18703	-6.20767	834,841,846,1432,3716,5594,5599,5602,7297	CASP1,CASP8,CASR,MAPK14,JAK1,MAPK1,MAPK8,MAPK10,TYK2	9/189
5_Member	KEGG Pathway	hsa04012	ErbB signaling pathway	-8.08252	-6.116	1956,2932,5290,5594,5599,5602,5747	EGFR,GSK3B,PIK3CA,MAPK1,MAPK8,MAPK10,PTK2	7/86
5_Member	KEGG Pathway	hsa05210	Colorectal cancer	-8.04715	-6.08244	836,1956,2932,5290,5594,5599,5602	CASP3,EGFR,GSK3B,PIK3CA,MAPK1,MAPK8,MAPK10	7/87
5_Member	KEGG Pathway	hsa05135	Yersinia infection	-7.99639	-6.03706	834,1432,2932,5290,5594,5599,5602,5747	CASP1,MAPK14,GSK3B,PIK3CA,MAPK1,MAPK8,MAPK10,PTK2	8/138
5_Member	KEGG Pathway	hsa04510	Focal adhesion	-7.91686	-5.96283	1956,2932,3480,3791,5290,5594,5599,5602,5747	EGFR,GSK3B,IGF1R,KDR,PIK3CA,MAPK1,MAPK8,MAPK10,PTK2	9/203
5_Member	KEGG Pathway	hsa04215	Apoptosis - multiple species	-7.36281	-5.49896	836,840,841,5599,5602	CASP3,CASP7,CASP8,MAPK8,MAPK10	5/32
5_Member	KEGG Pathway	hsa04664	Fc epsilon RI signaling pathway	-7.16895	-5.33942	240,1432,5290,5594,5599,5602	ALOX5,MAPK14,PIK3CA,MAPK1,MAPK8,MAPK10	6/69
5_Member	KEGG Pathway	hsa05132	Salmonella infection	-7.1236	-5.29801	834,836,840,841,1432,5290,5594,5599,5602	CASP1,CASP3,CASP7,CASP8,MAPK14,PIK3CA,MAPK1,MAPK8,MAPK10	9/251
5_Member	KEGG Pathway	hsa05120	Epithelial cell signaling in Helicobacter pylori infection	-7.0938	-5.27599	836,1432,1956,5599,5602,9020	CASP3,MAPK14,EGFR,MAPK8,MAPK10,MAP3K14	6/71
5_Member	KEGG Pathway	hsa04660	T cell receptor signaling pathway	-7.02513	-5.2137	1432,2932,5290,5594,5599,5602,9020	MAPK14,GSK3B,PIK3CA,MAPK1,MAPK8,MAPK10,MAP3K14	7/122
5_Member	KEGG Pathway	hsa05212	Pancreatic cancer	-6.88121	-5.08715	1956,3716,5290,5594,5599,5602	EGFR,JAK1,PIK3CA,MAPK1,MAPK8,MAPK10	6/77
5_Member	GO Molecular Functions	GO:0004707	MAP kinase activity	-6.85338	-5.06416	1432,5594,5599,5602	MAPK14,MAPK1,MAPK8,MAPK10	4/16
5_Member	KEGG Pathway	hsa04926	Relaxin signaling pathway	-6.8358	-5.05017	1432,1956,4312,5290,5594,5599,5602	MAPK14,EGFR,MMP1,PIK3CA,MAPK1,MAPK8,MAPK10	7/130
5_Member	KEGG Pathway	hsa05130	Pathogenic Escherichia coli infection	-6.69591	-4.92553	834,836,840,841,1432,5594,5599,5602	CASP1,CASP3,CASP7,CASP8,MAPK14,MAPK1,MAPK8,MAPK10	8/203
5_Member	KEGG Pathway	hsa05415	Diabetic cardiomyopathy	-6.66339	-4.89415	142,1432,2932,3643,5290,5599,5602,7137	PARP1,MAPK14,GSK3B,INSR,PIK3CA,MAPK8,MAPK10,TNNI3	8/205
5_Member	KEGG Pathway	hsa04910	Insulin signaling pathway	-6.65856	-4.89047	2932,3643,5290,5594,5599,5602,5836	GSK3B,INSR,PIK3CA,MAPK1,MAPK8,MAPK10,PYGL	7/138
5_Member	KEGG Pathway	hsa05418	Fluid shear stress and atherosclerosis	-6.59492	-4.83207	1432,3791,4780,5290,5599,5602,5747	MAPK14,KDR,NFE2L2,PIK3CA,MAPK8,MAPK10,PTK2	7/141
5_Member	KEGG Pathway	hsa04936	Alcoholic liver disease	-6.53272	-4.78039	836,841,1432,2932,5599,5602,9020	CASP3,CASP8,MAPK14,GSK3B,MAPK8,MAPK10,MAP3K14	7/144
5_Member	KEGG Pathway	hsa05142	Chagas disease	-6.12826	-4.42003	841,1432,5290,5594,5599,5602	CASP8,MAPK14,PIK3CA,MAPK1,MAPK8,MAPK10	6/103
5_Member	KEGG Pathway	hsa04931	Insulin resistance	-5.98345	-4.29853	2932,3643,5290,5599,5602,5836	GSK3B,INSR,PIK3CA,MAPK8,MAPK10,PYGL	6/109
5_Member	GO Biological Processes	GO:0042752	regulation of circadian rhythm	-5.86914	-4.19635	142,983,2932,5468,5599,5602	PARP1,CDK1,GSK3B,PPARG,MAPK8,MAPK10	6/114
5_Member	GO Biological Processes	GO:0090398	cellular senescence	-5.81781	-4.14869	1017,1432,3480,5599,5602	CDK2,MAPK14,IGF1R,MAPK8,MAPK10	5/64
5_Member	KEGG Pathway	hsa04912	GnRH signaling pathway	-5.01431	-3.44646	1432,1956,5594,5599,5602	MAPK14,EGFR,MAPK1,MAPK8,MAPK10	5/93
5_Member	KEGG Pathway	hsa04750	Inflammatory mediator regulation of TRP channels	-4.88183	-3.33168	239,1432,5290,5599,5602	ALOX12,MAPK14,PIK3CA,MAPK8,MAPK10	5/99
5_Member	KEGG Pathway	hsa05231	Choline metabolism in cancer	-4.88183	-3.33168	1956,5290,5594,5599,5602	EGFR,PIK3CA,MAPK1,MAPK8,MAPK10	5/99
5_Member	KEGG Pathway	hsa05020	Prion disease	-4.64423	-3.11968	836,1432,2932,5290,5594,5599,5602	CASP3,MAPK14,GSK3B,PIK3CA,MAPK1,MAPK8,MAPK10	7/278
5_Member	GO Biological Processes	GO:0007254	JNK cascade	-4.52809	-3.0277	846,5599,5602,120892	CASR,MAPK8,MAPK10,LRRK2	4/58
5_Member	KEGG Pathway	hsa04071	Sphingolipid signaling pathway	-4.4435	-2.95471	1432,5290,5594,5599,5602	MAPK14,PIK3CA,MAPK1,MAPK8,MAPK10	5/122
5_Member	GO Biological Processes	GO:0051403	stress-activated MAPK cascade	-4.28266	-2.81675	1432,5594,5599	MAPK14,MAPK1,MAPK8	3/24
5_Member	KEGG Pathway	hsa04622	RIG-I-like receptor signaling pathway	-4.15747	-2.70728	841,1432,5599,5602	CASP8,MAPK14,MAPK8,MAPK10	4/72
5_Member	GO Biological Processes	GO:0031098	stress-activated protein kinase signaling cascade	-4.12561	-2.68197	1432,5594,5599	MAPK14,MAPK1,MAPK8	3/27
5_Member	GO Biological Processes	GO:0097009	energy homeostasis	-3.91659	-2.49672	1432,5290,5467,5599	MAPK14,PIK3CA,PPARD,MAPK8	4/83
5_Member	KEGG Pathway	hsa04140	Autophagy - animal	-3.77431	-2.37354	3480,5290,5594,5599,5602	IGF1R,PIK3CA,MAPK1,MAPK8,MAPK10	5/169
5_Member	KEGG Pathway	hsa04310	Wnt signaling pathway	-3.7154	-2.32484	2932,5467,5599,5602,5663	GSK3B,PPARD,MAPK8,MAPK10,PSEN1	5/174
5_Member	GO Molecular Functions	GO:0004712	protein serine/threonine/tyrosine kinase activity	-3.51563	-2.14999	1432,5602,6790	MAPK14,MAPK10,AURKA	3/43
5_Member	KEGG Pathway	hsa05016	Huntington disease	-3.42409	-2.06814	836,841,2915,5468,5599,5602	CASP3,CASP8,GRM5,PPARG,MAPK8,MAPK10	6/311
5_Member	KEGG Pathway	hsa04024	cAMP signaling pathway	-3.19535	-1.86357	5290,5594,5599,5602,7137	PIK3CA,MAPK1,MAPK8,MAPK10,TNNI3	5/226
5_Member	GO Biological Processes	GO:0038093	Fc receptor signaling pathway	-3.17655	-1.84686	5599,5602,5747	MAPK8,MAPK10,PTK2	3/56
5_Member	KEGG Pathway	hsa04728	Dopaminergic synapse	-3.14775	-1.82097	1432,2932,5599,5602	MAPK14,GSK3B,MAPK8,MAPK10	4/132
5_Member	KEGG Pathway	hsa04920	Adipocytokine signaling pathway	-2.89434	-1.59176	3717,5599,5602	JAK2,MAPK8,MAPK10	3/70
5_Member	KEGG Pathway	hsa05012	Parkinson disease	-2.84407	-1.54617	836,4780,5599,5602,120892	CASP3,NFE2L2,MAPK8,MAPK10,LRRK2	5/271
5_Member	KEGG Pathway	hsa05017	Spinocerebellar ataxia	-2.01468	-0.798937	5290,5599,5602	PIK3CA,MAPK8,MAPK10	3/144
6_Summary	GO Biological Processes	GO:0010038	response to metal ion	-16.7054	-13.6374	142,836,841,846,983,1584,1585,1956,4193,4780,5594,5599,5743,7015,7134,7139,8644,120892,1268,1432,3480,5292,5467,5468,7298,7421,231,834,5290,3717,3741,5663,5742,2260,5602,9020,4312,2915	PARP1,CASP3,CASP8,CASR,CDK1,CYP11B1,CYP11B2,EGFR,MDM2,NFE2L2,MAPK1,MAPK8,PTGS2,TERT,TNNC1,TNNT2,AKR1C3,LRRK2,CNR1,MAPK14,IGF1R,PIM1,PPARD,PPARG,TYMS,VDR,AKR1B1,CASP1,PIK3CA,JAK2,KCNA5,PSEN1,PTGS1,FGFR1,MAPK10,MAP3K14,MMP1,GRM5	38/-
6_Member	GO Biological Processes	GO:0010038	response to metal ion	-16.7054	-13.6374	142,836,841,846,983,1584,1585,1956,4193,4780,5594,5599,5743,7015,7134,7139,8644,120892	PARP1,CASP3,CASP8,CASR,CDK1,CYP11B1,CYP11B2,EGFR,MDM2,NFE2L2,MAPK1,MAPK8,PTGS2,TERT,TNNC1,TNNT2,AKR1C3,LRRK2	18/347
6_Member	GO Biological Processes	GO:0031667	response to nutrient levels	-12.9143	-10.2488	846,1268,1432,1956,3480,4193,4780,5292,5467,5468,5594,5599,5743,7298,7421,8644,120892	CASR,CNR1,MAPK14,EGFR,IGF1R,MDM2,NFE2L2,PIM1,PPARD,PPARG,MAPK1,MAPK8,PTGS2,TYMS,VDR,AKR1C3,LRRK2	17/490
6_Member	GO Biological Processes	GO:0062197	cellular response to chemical stress	-11.4487	-8.95926	142,231,834,836,983,1956,4193,4780,5290,5594,5599,5743,120892	PARP1,AKR1B1,CASP1,CASP3,CDK1,EGFR,MDM2,NFE2L2,PIK3CA,MAPK1,MAPK8,PTGS2,LRRK2	13/283
6_Member	GO Biological Processes	GO:0006979	response to oxidative stress	-11.2037	-8.75457	142,836,983,1956,3717,3741,4193,4780,5594,5599,5663,5742,5743,120892	PARP1,CASP3,CDK1,EGFR,JAK2,KCNA5,MDM2,NFE2L2,MAPK1,MAPK8,PSEN1,PTGS1,PTGS2,LRRK2	14/368
6_Member	GO Biological Processes	GO:0031669	cellular response to nutrient levels	-9.83078	-7.61116	846,3480,4193,4780,5292,5467,5594,5599,7421,8644,120892	CASR,IGF1R,MDM2,NFE2L2,PIM1,PPARD,MAPK1,MAPK8,VDR,AKR1C3,LRRK2	11/235
6_Member	GO Biological Processes	GO:0071248	cellular response to metal ion	-9.51569	-7.32732	142,1584,1585,1956,4780,5594,5599,5743,8644,120892	PARP1,CYP11B1,CYP11B2,EGFR,NFE2L2,MAPK1,MAPK8,PTGS2,AKR1C3,LRRK2	10/188
6_Member	GO Biological Processes	GO:0000165	MAPK cascade	-8.89005	-6.80339	846,983,1432,1956,2260,5594,5599,5602,9020,120892	CASR,CDK1,MAPK14,EGFR,FGFR1,MAPK1,MAPK8,MAPK10,MAP3K14,LRRK2	10/218
6_Member	GO Biological Processes	GO:0000302	response to reactive oxygen species	-8.33033	-6.328	836,983,1956,3741,4193,4780,5594,5599,120892	CASP3,CDK1,EGFR,KCNA5,MDM2,NFE2L2,MAPK1,MAPK8,LRRK2	9/182
6_Member	GO Biological Processes	GO:0034614	cellular response to reactive oxygen species	-6.7237	-4.94981	983,1956,4193,4780,5594,5599,120892	CDK1,EGFR,MDM2,NFE2L2,MAPK1,MAPK8,LRRK2	7/135
6_Member	GO Biological Processes	GO:0034599	cellular response to oxidative stress	-6.34137	-4.61374	142,983,1956,4193,4780,5594,5599,120892	PARP1,CDK1,EGFR,MDM2,NFE2L2,MAPK1,MAPK8,LRRK2	8/226
6_Member	GO Biological Processes	GO:0046686	response to cadmium ion	-5.92246	-4.24225	983,1956,5594,5599,7015	CDK1,EGFR,MAPK1,MAPK8,TERT	5/61
6_Member	KEGG Pathway	hsa05219	Bladder cancer	-5.13315	-3.55135	1956,4193,4312,5594	EGFR,MDM2,MMP1,MAPK1	4/41
6_Member	GO Biological Processes	GO:0009267	cellular response to starvation	-4.79612	-3.25354	3480,4780,5594,5599,8644,120892	IGF1R,NFE2L2,MAPK1,MAPK8,AKR1C3,LRRK2	6/175
6_Member	KEGG Pathway	hsa04928	Parathyroid hormone synthesis, secretion and action	-4.5668	-3.05955	846,1956,2260,5594,7421	CASR,EGFR,FGFR1,MAPK1,VDR	5/115
6_Member	GO Biological Processes	GO:0042594	response to starvation	-4.28355	-2.81675	3480,4780,5594,5599,8644,120892	IGF1R,NFE2L2,MAPK1,MAPK8,AKR1C3,LRRK2	6/216
6_Member	KEGG Pathway	hsa04540	Gap junction	-3.74362	-2.34823	983,1956,2915,5594	CDK1,EGFR,GRM5,MAPK1	4/92
6_Member	GO Biological Processes	GO:0071276	cellular response to cadmium ion	-3.67608	-2.2903	1956,5594,5599	EGFR,MAPK1,MAPK8	3/38
7_Summary	KEGG Pathway	hsa05161	Hepatitis B	-16.0806	-13.0505	836,841,890,898,1017,1432,3716,3717,3718,5290,5594,5599,5602,7297,4193,9020,1956,2932,5663,5743,5747,7015,983,1111	CASP3,CASP8,CCNA2,CCNE1,CDK2,MAPK14,JAK1,JAK2,JAK3,PIK3CA,MAPK1,MAPK8,MAPK10,TYK2,MDM2,MAP3K14,EGFR,GSK3B,PSEN1,PTGS2,PTK2,TERT,CDK1,CHEK1	24/-
7_Member	KEGG Pathway	hsa05161	Hepatitis B	-16.0806	-13.0505	836,841,890,898,1017,1432,3716,3717,3718,5290,5594,5599,5602,7297	CASP3,CASP8,CCNA2,CCNE1,CDK2,MAPK14,JAK1,JAK2,JAK3,PIK3CA,MAPK1,MAPK8,MAPK10,TYK2	14/163
7_Member	KEGG Pathway	hsa05169	Epstein-Barr virus infection	-14.7378	-11.8825	836,841,890,898,1017,1432,3716,3718,4193,5290,5599,5602,7297,9020	CASP3,CASP8,CCNA2,CCNE1,CDK2,MAPK14,JAK1,JAK3,MDM2,PIK3CA,MAPK8,MAPK10,TYK2,MAP3K14	14/203
7_Member	KEGG Pathway	hsa05165	Human papillomavirus infection	-14.3373	-11.4958	836,841,890,898,1017,1956,2932,3716,4193,5290,5594,5663,5743,5747,7015,7297	CASP3,CASP8,CCNA2,CCNE1,CDK2,EGFR,GSK3B,JAK1,MDM2,PIK3CA,MAPK1,PSEN1,PTGS2,PTK2,TERT,TYK2	16/333
7_Member	KEGG Pathway	hsa05162	Measles	-12.3101	-9.70543	836,841,898,1017,2932,3716,3718,5290,5599,5602,7297	CASP3,CASP8,CCNE1,CDK2,GSK3B,JAK1,JAK3,PIK3CA,MAPK8,MAPK10,TYK2	11/139
7_Member	KEGG Pathway	hsa05203	Viral carcinogenesis	-11.8292	-9.27483	836,841,890,898,983,1017,1111,3716,3718,4193,5290,5594	CASP3,CASP8,CCNA2,CCNE1,CDK1,CDK2,CHEK1,JAK1,JAK3,MDM2,PIK3CA,MAPK1	12/205
7_Member	KEGG Pathway	hsa05166	Human T-cell leukemia virus 1 infection	-11.398	-8.92047	890,898,1017,1111,3716,3718,5290,5594,5599,5602,7015,9020	CCNA2,CCNE1,CDK2,CHEK1,JAK1,JAK3,PIK3CA,MAPK1,MAPK8,MAPK10,TERT,MAP3K14	12/223
7_Member	KEGG Pathway	hsa05163	Human cytomegalovirus infection	-10.0119	-7.77576	836,841,1432,1956,2932,3716,4193,5290,5594,5743,5747	CASP3,CASP8,MAPK14,EGFR,GSK3B,JAK1,MDM2,PIK3CA,MAPK1,PTGS2,PTK2	11/226
7_Member	KEGG Pathway	hsa05160	Hepatitis C	-8.8466	-6.76939	836,841,1017,1956,2932,3716,5290,5594,7297	CASP3,CASP8,CDK2,EGFR,GSK3B,JAK1,PIK3CA,MAPK1,TYK2	9/159
8_Summary	GO Biological Processes	GO:0071214	cellular response to abiotic stimulus	-15.9517	-12.9667	142,231,834,836,841,1111,1432,1956,3480,3753,4193,4312,5290,5599,5724,5743,9020,3741,3784,5747,890,1588,2099,3767,898,4170,5243,5292,5594,1017	PARP1,AKR1B1,CASP1,CASP3,CASP8,CHEK1,MAPK14,EGFR,IGF1R,KCNE1,MDM2,MMP1,PIK3CA,MAPK8,PTAFR,PTGS2,MAP3K14,KCNA5,KCNQ1,PTK2,CCNA2,CYP19A1,ESR1,KCNJ11,CCNE1,MCL1,ABCB1,PIM1,MAPK1,CDK2	30/-
8_Member	GO Biological Processes	GO:0071214	cellular response to abiotic stimulus	-15.9517	-12.9667	142,231,834,836,841,1111,1432,1956,3480,3753,4193,4312,5290,5599,5724,5743,9020	PARP1,AKR1B1,CASP1,CASP3,CASP8,CHEK1,MAPK14,EGFR,IGF1R,KCNE1,MDM2,MMP1,PIK3CA,MAPK8,PTAFR,PTGS2,MAP3K14	17/320
8_Member	GO Biological Processes	GO:0104004	cellular response to environmental stimulus	-15.9517	-12.9667	142,231,834,836,841,1111,1432,1956,3480,3753,4193,4312,5290,5599,5724,5743,9020	PARP1,AKR1B1,CASP1,CASP3,CASP8,CHEK1,MAPK14,EGFR,IGF1R,KCNE1,MDM2,MMP1,PIK3CA,MAPK8,PTAFR,PTGS2,MAP3K14	17/320
8_Member	GO Biological Processes	GO:0009612	response to mechanical stimulus	-12.8393	-10.1828	834,841,1111,1432,1956,3480,3741,3784,5290,5599,5743,5747,9020	CASP1,CASP8,CHEK1,MAPK14,EGFR,IGF1R,KCNA5,KCNQ1,PIK3CA,MAPK8,PTGS2,PTK2,MAP3K14	13/220
8_Member	GO Biological Processes	GO:0071260	cellular response to mechanical stimulus	-10.1735	-7.92019	834,841,1111,1956,3480,5599,5743,9020	CASP1,CASP8,CHEK1,EGFR,IGF1R,MAPK8,PTGS2,MAP3K14	8/74
8_Member	GO Biological Processes	GO:0071496	cellular response to external stimulus	-10.1256	-7.87922	834,841,1111,1956,3480,5599,5743,9020	CASP1,CASP8,CHEK1,EGFR,IGF1R,MAPK8,PTGS2,MAP3K14	8/75
8_Member	GO Biological Processes	GO:0032355	response to estradiol	-10.004	-7.77119	836,841,890,1588,1956,2099,3480,3767,5743	CASP3,CASP8,CCNA2,CYP19A1,EGFR,ESR1,IGF1R,KCNJ11,PTGS2	9/118
8_Member	KEGG Pathway	hsa05206	MicroRNAs in cancer	-7.40606	-5.5379	836,898,1956,4170,4193,5243,5290,5292,5594,5743	CASP3,CCNE1,EGFR,MCL1,MDM2,ABCB1,PIK3CA,PIM1,MAPK1,PTGS2	10/312
8_Member	KEGG Pathway	hsa05222	Small cell lung cancer	-6.39091	-4.65908	836,898,1017,5290,5743,5747	CASP3,CCNE1,CDK2,PIK3CA,PTGS2,PTK2	6/93
8_Member	GO Biological Processes	GO:0043200	response to amino acid	-4.34375	-2.86625	836,1956,3480,5290,5743	CASP3,EGFR,IGF1R,PIK3CA,PTGS2	5/128
8_Member	GO Biological Processes	GO:0001101	response to acid chemical	-4.11498	-2.67297	836,1956,3480,5290,5743	CASP3,EGFR,IGF1R,PIK3CA,PTGS2	5/143
8_Member	GO Biological Processes	GO:0071229	cellular response to acid chemical	-2.46463	-1.20816	1956,5290,5743	EGFR,PIK3CA,PTGS2	3/99
9_Summary	GO Biological Processes	GO:0042391	regulation of membrane potential	-15.722	-12.7733	142,1020,1268,2554,2555,2556,2558,2562,2566,2915,2932,3741,3753,3767,3784,3791,5663,10060,120892,1432,5594,5599,5602,5743,2908,3164,3480,3643,846,7421,4170,3717,5747,6790,5664,841,1956,5290,5724,762	PARP1,CDK5,CNR1,GABRA1,GABRA2,GABRA3,GABRA5,GABRB3,GABRG2,GRM5,GSK3B,KCNA5,KCNE1,KCNJ11,KCNQ1,KDR,PSEN1,ABCC9,LRRK2,MAPK14,MAPK1,MAPK8,MAPK10,PTGS2,NR3C1,NR4A1,IGF1R,INSR,CASR,VDR,MCL1,JAK2,PTK2,AURKA,PSEN2,CASP8,EGFR,PIK3CA,PTAFR,CA4	40/-
9_Member	GO Biological Processes	GO:0042391	regulation of membrane potential	-15.722	-12.7733	142,1020,1268,2554,2555,2556,2558,2562,2566,2915,2932,3741,3753,3767,3784,3791,5663,10060,120892	PARP1,CDK5,CNR1,GABRA1,GABRA2,GABRA3,GABRA5,GABRB3,GABRG2,GRM5,GSK3B,KCNA5,KCNE1,KCNJ11,KCNQ1,KDR,PSEN1,ABCC9,LRRK2	19/465
9_Member	KEGG Pathway	hsa04723	Retrograde endocannabinoid signaling	-15.0415	-12.1261	1268,1432,2554,2555,2556,2558,2562,2566,2915,5594,5599,5602,5743	CNR1,MAPK14,GABRA1,GABRA2,GABRA3,GABRA5,GABRB3,GABRG2,GRM5,MAPK1,MAPK8,MAPK10,PTGS2	13/149
9_Member	GO Biological Processes	GO:0099537	trans-synaptic signaling	-11.4341	-8.95072	1020,1268,2554,2555,2556,2558,2562,2566,2908,2915,2932,3164,5594,5663,120892	CDK5,CNR1,GABRA1,GABRA2,GABRA3,GABRA5,GABRB3,GABRG2,NR3C1,GRM5,GSK3B,NR4A1,MAPK1,PSEN1,LRRK2	15/431
9_Member	GO Biological Processes	GO:0099536	synaptic signaling	-11.0334	-8.59515	1020,1268,2554,2555,2556,2558,2562,2566,2908,2915,2932,3164,5594,5663,120892	CDK5,CNR1,GABRA1,GABRA2,GABRA3,GABRA5,GABRB3,GABRG2,NR3C1,GRM5,GSK3B,NR4A1,MAPK1,PSEN1,LRRK2	15/460
9_Member	GO Molecular Functions	GO:0022851	GABA-gated chloride ion channel activity	-10.9252	-8.52106	2554,2555,2556,2558,2562,2566	GABRA1,GABRA2,GABRA3,GABRA5,GABRB3,GABRG2	6/18
9_Member	GO Molecular Functions	GO:0004890	GABA-A receptor activity	-10.7614	-8.39418	2554,2555,2556,2558,2562,2566	GABRA1,GABRA2,GABRA3,GABRA5,GABRB3,GABRG2	6/19
9_Member	GO Cellular Components	GO:1902711	GABA-A receptor complex	-10.7614	-8.39418	2554,2555,2556,2558,2562,2566	GABRA1,GABRA2,GABRA3,GABRA5,GABRB3,GABRG2	6/19
9_Member	GO Biological Processes	GO:0007268	chemical synaptic transmission	-10.5237	-8.19816	1020,2554,2555,2556,2558,2562,2566,2908,2915,2932,3164,5594,5663,120892	CDK5,GABRA1,GABRA2,GABRA3,GABRA5,GABRB3,GABRG2,NR3C1,GRM5,GSK3B,NR4A1,MAPK1,PSEN1,LRRK2	14/414
9_Member	GO Biological Processes	GO:0098916	anterograde trans-synaptic signaling	-10.5237	-8.19816	1020,2554,2555,2556,2558,2562,2566,2908,2915,2932,3164,5594,5663,120892	CDK5,GABRA1,GABRA2,GABRA3,GABRA5,GABRB3,GABRG2,NR3C1,GRM5,GSK3B,NR4A1,MAPK1,PSEN1,LRRK2	14/414
9_Member	GO Cellular Components	GO:1902710	GABA receptor complex	-10.4625	-8.14919	2554,2555,2556,2558,2562,2566	GABRA1,GABRA2,GABRA3,GABRA5,GABRB3,GABRG2	6/21
9_Member	GO Biological Processes	GO:0060078	regulation of postsynaptic membrane potential	-10.389	-8.09537	1020,2554,2555,2556,2558,2566,2915,2932,120892	CDK5,GABRA1,GABRA2,GABRA3,GABRA5,GABRG2,GRM5,GSK3B,LRRK2	9/107
9_Member	GO Molecular Functions	GO:0016917	GABA receptor activity	-10.3252	-8.03927	2554,2555,2556,2558,2562,2566	GABRA1,GABRA2,GABRA3,GABRA5,GABRB3,GABRG2	6/22
9_Member	GO Biological Processes	GO:1904862	inhibitory synapse assembly	-10.195	-7.93821	2554,2555,2556,2558,2562,2566	GABRA1,GABRA2,GABRA3,GABRA5,GABRB3,GABRG2	6/23
9_Member	GO Molecular Functions	GO:0008503	benzodiazepine receptor activity	-9.98037	-7.75092	2554,2555,2556,2558,2566	GABRA1,GABRA2,GABRA3,GABRA5,GABRG2	5/11
9_Member	GO Biological Processes	GO:0051932	synaptic transmission, GABAergic	-9.62836	-7.42465	2554,2555,2556,2558,2562,2566	GABRA1,GABRA2,GABRA3,GABRA5,GABRB3,GABRG2	6/28
9_Member	GO Biological Processes	GO:0007214	gamma-aminobutyric acid signaling pathway	-9.52875	-7.33431	2554,2555,2556,2558,2562,2566	GABRA1,GABRA2,GABRA3,GABRA5,GABRB3,GABRG2	6/29
9_Member	GO Biological Processes	GO:0050808	synapse organization	-9.3225	-7.16047	1020,2554,2555,2556,2558,2562,2566,2915,3480,3643,5663,120892	CDK5,GABRA1,GABRA2,GABRA3,GABRA5,GABRB3,GABRG2,GRM5,IGF1R,INSR,PSEN1,LRRK2	12/337
9_Member	GO Cellular Components	GO:0032589	neuron projection membrane	-9.19822	-7.05562	2554,2555,2556,2558,2566,3643,3767	GABRA1,GABRA2,GABRA3,GABRA5,GABRG2,INSR,KCNJ11	7/60
9_Member	GO Biological Processes	GO:0015698	inorganic anion transport	-8.87084	-6.79127	846,2554,2555,2556,2558,2562,2566,3784,7421	CASR,GABRA1,GABRA2,GABRA3,GABRA5,GABRB3,GABRG2,KCNQ1,VDR	9/158
9_Member	GO Biological Processes	GO:0006820	monoatomic anion transport	-8.82253	-6.74997	846,2554,2555,2556,2558,2562,2566,3784,10060	CASR,GABRA1,GABRA2,GABRA3,GABRA5,GABRB3,GABRG2,KCNQ1,ABCC9	9/160
9_Member	GO Cellular Components	GO:0032590	dendrite membrane	-8.63293	-6.574	2554,2555,2556,2558,2566,3643	GABRA1,GABRA2,GABRA3,GABRA5,GABRG2,INSR	6/40
9_Member	KEGG Pathway	hsa05033	Nicotine addiction	-8.56527	-6.51521	2554,2555,2556,2558,2562,2566	GABRA1,GABRA2,GABRA3,GABRA5,GABRB3,GABRG2	6/41
9_Member	GO Molecular Functions	GO:0022836	gated channel activity	-8.44724	-6.41649	2554,2555,2556,2558,2562,2566,3741,3753,3767,3784,10060	GABRA1,GABRA2,GABRA3,GABRA5,GABRB3,GABRG2,KCNA5,KCNE1,KCNJ11,KCNQ1,ABCC9	11/318
9_Member	GO Molecular Functions	GO:0015267	channel activity	-8.39117	-6.37078	2554,2555,2556,2558,2562,2566,3741,3753,3767,3784,4170,5663,10060	GABRA1,GABRA2,GABRA3,GABRA5,GABRB3,GABRG2,KCNA5,KCNE1,KCNJ11,KCNQ1,MCL1,PSEN1,ABCC9	13/502
9_Member	GO Molecular Functions	GO:0022803	passive transmembrane transporter activity	-8.38086	-6.36657	2554,2555,2556,2558,2562,2566,3741,3753,3767,3784,4170,5663,10060	GABRA1,GABRA2,GABRA3,GABRA5,GABRB3,GABRG2,KCNA5,KCNE1,KCNJ11,KCNQ1,MCL1,PSEN1,ABCC9	13/503
9_Member	GO Biological Processes	GO:0098661	inorganic anion transmembrane transport	-8.22747	-6.24156	846,2554,2555,2556,2558,2562,2566,7421	CASR,GABRA1,GABRA2,GABRA3,GABRA5,GABRB3,GABRG2,VDR	8/129
9_Member	GO Molecular Functions	GO:0099095	ligand-gated monoatomic anion channel activity	-8.19356	-6.21232	2554,2555,2556,2558,2562,2566	GABRA1,GABRA2,GABRA3,GABRA5,GABRB3,GABRG2	6/47
9_Member	GO Molecular Functions	GO:0005216	monoatomic ion channel activity	-8.01108	-6.04817	2554,2555,2556,2558,2562,2566,3741,3753,3767,3784,5663,10060	GABRA1,GABRA2,GABRA3,GABRA5,GABRB3,GABRG2,KCNA5,KCNE1,KCNJ11,KCNQ1,PSEN1,ABCC9	12/441
9_Member	GO Cellular Components	GO:0098794	postsynapse	-7.91126	-5.95899	1020,2554,2555,2556,2558,2562,2566,2915,2932,3717,5663,5747,6790,120892	CDK5,GABRA1,GABRA2,GABRA3,GABRA5,GABRB3,GABRG2,GRM5,GSK3B,JAK2,PSEN1,PTK2,AURKA,LRRK2	14/660
9_Member	GO Biological Processes	GO:0098656	monoatomic anion transmembrane transport	-7.87489	-5.92957	846,2554,2555,2556,2558,2562,2566,10060	CASR,GABRA1,GABRA2,GABRA3,GABRA5,GABRB3,GABRG2,ABCC9	8/143
9_Member	GO Cellular Components	GO:0034702	monoatomic ion channel complex	-7.8169	-5.8801	2554,2555,2556,2558,2562,2566,3741,3753,3767,3784,10060	GABRA1,GABRA2,GABRA3,GABRA5,GABRB3,GABRG2,KCNA5,KCNE1,KCNJ11,KCNQ1,ABCC9	11/366
9_Member	GO Cellular Components	GO:0034707	chloride channel complex	-7.72251	-5.80392	2554,2555,2556,2558,2562,2566	GABRA1,GABRA2,GABRA3,GABRA5,GABRB3,GABRG2	6/56
9_Member	GO Molecular Functions	GO:0030594	neurotransmitter receptor activity	-7.71569	-5.80033	2554,2555,2556,2558,2562,2566,2915	GABRA1,GABRA2,GABRA3,GABRA5,GABRB3,GABRG2,GRM5	7/97
9_Member	GO Cellular Components	GO:0097060	synaptic membrane	-7.41223	-5.53972	1268,2554,2555,2556,2558,2562,2566,2915,3767,5663,5664	CNR1,GABRA1,GABRA2,GABRA3,GABRA5,GABRB3,GABRG2,GRM5,KCNJ11,PSEN1,PSEN2	11/401
9_Member	GO Molecular Functions	GO:0022824	transmitter-gated monoatomic ion channel activity	-7.40919	-5.53959	2554,2555,2556,2558,2562,2566	GABRA1,GABRA2,GABRA3,GABRA5,GABRB3,GABRG2	6/63
9_Member	GO Molecular Functions	GO:0022835	transmitter-gated channel activity	-7.40919	-5.53959	2554,2555,2556,2558,2562,2566	GABRA1,GABRA2,GABRA3,GABRA5,GABRB3,GABRG2	6/63
9_Member	GO Biological Processes	GO:1902476	chloride transmembrane transport	-7.36308	-5.49896	846,2554,2555,2556,2558,2562,2566	CASR,GABRA1,GABRA2,GABRA3,GABRA5,GABRB3,GABRG2	7/109
9_Member	GO Biological Processes	GO:0098660	inorganic ion transmembrane transport	-7.33727	-5.4791	846,2554,2555,2556,2558,2562,2566,3741,3753,3767,3784,5663,7421,10060	CASR,GABRA1,GABRA2,GABRA3,GABRA5,GABRB3,GABRG2,KCNA5,KCNE1,KCNJ11,KCNQ1,PSEN1,VDR,ABCC9	14/734
9_Member	GO Cellular Components	GO:0030425	dendrite	-7.28715	-5.44011	1020,2554,2555,2556,2558,2566,2915,2932,3643,5599,5663,5747,120892	CDK5,GABRA1,GABRA2,GABRA3,GABRA5,GABRG2,GRM5,GSK3B,INSR,MAPK8,PSEN1,PTK2,LRRK2	13/623
9_Member	GO Cellular Components	GO:0097447	dendritic tree	-7.271	-5.42533	1020,2554,2555,2556,2558,2566,2915,2932,3643,5599,5663,5747,120892	CDK5,GABRA1,GABRA2,GABRA3,GABRA5,GABRG2,GRM5,GSK3B,INSR,MAPK8,PSEN1,PTK2,LRRK2	13/625
9_Member	GO Cellular Components	GO:0031252	cell leading edge	-7.12599	-5.2991	841,1020,1956,2554,2555,2556,2558,2566,3643,3767,5290	CASP8,CDK5,EGFR,GABRA1,GABRA2,GABRA3,GABRA5,GABRG2,INSR,KCNJ11,PIK3CA	11/428
9_Member	GO Cellular Components	GO:0031256	leading edge membrane	-7.11562	-5.29134	1956,2554,2555,2556,2558,2566,3643,3767	EGFR,GABRA1,GABRA2,GABRA3,GABRA5,GABRG2,INSR,KCNJ11	8/179
9_Member	GO Biological Processes	GO:0034330	cell junction organization	-7.11031	-5.28734	1020,2554,2555,2556,2558,2562,2566,2915,3480,3643,5663,120892	CDK5,GABRA1,GABRA2,GABRA3,GABRA5,GABRB3,GABRG2,GRM5,IGF1R,INSR,PSEN1,LRRK2	12/533
9_Member	GO Biological Processes	GO:0007416	synapse assembly	-7.09958	-5.27919	1020,2554,2555,2556,2558,2562,2566	CDK5,GABRA1,GABRA2,GABRA3,GABRA5,GABRB3,GABRG2	7/119
9_Member	GO Biological Processes	GO:0006821	chloride transport	-7.07454	-5.25801	846,2554,2555,2556,2558,2562,2566	CASR,GABRA1,GABRA2,GABRA3,GABRA5,GABRB3,GABRG2	7/120
9_Member	GO Molecular Functions	GO:0005230	extracellular ligand-gated monoatomic ion channel activity	-7.02087	-5.21197	2554,2555,2556,2558,2562,2566	GABRA1,GABRA2,GABRA3,GABRA5,GABRB3,GABRG2	6/73
9_Member	GO Molecular Functions	GO:0015276	ligand-gated monoatomic ion channel activity	-7.00523	-5.19758	2554,2555,2556,2558,2562,2566,3767,10060	GABRA1,GABRA2,GABRA3,GABRA5,GABRB3,GABRG2,KCNJ11,ABCC9	8/185
9_Member	GO Molecular Functions	GO:0022834	ligand-gated channel activity	-6.9872	-5.18206	2554,2555,2556,2558,2562,2566,3767,10060	GABRA1,GABRA2,GABRA3,GABRA5,GABRB3,GABRG2,KCNJ11,ABCC9	8/186
9_Member	GO Molecular Functions	GO:0005254	chloride channel activity	-6.74908	-4.96938	2554,2555,2556,2558,2562,2566	GABRA1,GABRA2,GABRA3,GABRA5,GABRB3,GABRG2	6/81
9_Member	KEGG Pathway	hsa04080	Neuroactive ligand-receptor interaction	-6.73943	-4.96208	1268,2554,2555,2556,2558,2562,2566,2908,2915,5724	CNR1,GABRA1,GABRA2,GABRA3,GABRA5,GABRB3,GABRG2,NR3C1,GRM5,PTAFR	10/368
9_Member	KEGG Pathway	hsa04727	GABAergic synapse	-6.50453	-4.75878	2554,2555,2556,2558,2562,2566	GABRA1,GABRA2,GABRA3,GABRA5,GABRB3,GABRG2	6/89
9_Member	KEGG Pathway	hsa05032	Morphine addiction	-6.44705	-4.70992	2554,2555,2556,2558,2562,2566	GABRA1,GABRA2,GABRA3,GABRA5,GABRB3,GABRG2	6/91
9_Member	GO Cellular Components	GO:1902495	transmembrane transporter complex	-6.38407	-4.6533	2554,2555,2556,2558,2562,2566,3741,3753,3767,3784,10060	GABRA1,GABRA2,GABRA3,GABRA5,GABRB3,GABRG2,KCNA5,KCNE1,KCNJ11,KCNQ1,ABCC9	11/508
9_Member	GO Molecular Functions	GO:0005253	monoatomic anion channel activity	-6.25601	-4.537	2554,2555,2556,2558,2562,2566	GABRA1,GABRA2,GABRA3,GABRA5,GABRB3,GABRG2	6/98
9_Member	GO Cellular Components	GO:1990351	transporter complex	-6.16319	-4.45195	2554,2555,2556,2558,2562,2566,3741,3753,3767,3784,10060	GABRA1,GABRA2,GABRA3,GABRA5,GABRB3,GABRG2,KCNA5,KCNE1,KCNJ11,KCNQ1,ABCC9	11/535
9_Member	GO Molecular Functions	GO:0015103	inorganic anion transmembrane transporter activity	-6.15069	-4.44046	2554,2555,2556,2558,2562,2566,10060	GABRA1,GABRA2,GABRA3,GABRA5,GABRB3,GABRG2,ABCC9	7/164
9_Member	GO Cellular Components	GO:0031253	cell projection membrane	-5.86149	-4.18962	762,1956,2554,2555,2556,2558,2566,3643,3767	CA4,EGFR,GABRA1,GABRA2,GABRA3,GABRA5,GABRG2,INSR,KCNJ11	9/355
9_Member	GO Molecular Functions	GO:0015108	chloride transmembrane transporter activity	-5.76007	-4.0964	2554,2555,2556,2558,2562,2566	GABRA1,GABRA2,GABRA3,GABRA5,GABRB3,GABRG2	6/119
9_Member	GO Molecular Functions	GO:0015318	inorganic molecular entity transmembrane transporter activity	-5.6425	-3.99734	2554,2555,2556,2558,2562,2566,3741,3753,3767,3784,5663,10060	GABRA1,GABRA2,GABRA3,GABRA5,GABRB3,GABRG2,KCNA5,KCNE1,KCNJ11,KCNQ1,PSEN1,ABCC9	12/734
9_Member	GO Molecular Functions	GO:0098960	postsynaptic neurotransmitter receptor activity	-5.62335	-3.98163	2554,2555,2558,2566,2915	GABRA1,GABRA2,GABRA5,GABRG2,GRM5	5/70
9_Member	GO Cellular Components	GO:0099634	postsynaptic specialization membrane	-5.53651	-3.90496	2554,2555,2558,2562,2566,2915	GABRA1,GABRA2,GABRA5,GABRB3,GABRG2,GRM5	6/130
9_Member	GO Molecular Functions	GO:0015075	monoatomic ion transmembrane transporter activity	-5.45848	-3.83848	2554,2555,2556,2558,2562,2566,3741,3753,3767,3784,5663,10060	GABRA1,GABRA2,GABRA3,GABRA5,GABRB3,GABRG2,KCNA5,KCNE1,KCNJ11,KCNQ1,PSEN1,ABCC9	12/765
9_Member	GO Cellular Components	GO:0098982	GABA-ergic synapse	-5.36266	-3.75392	1268,2554,2555,2558,2566	CNR1,GABRA1,GABRA2,GABRA5,GABRG2	5/79
9_Member	GO Molecular Functions	GO:0008509	monoatomic anion transmembrane transporter activity	-5.27974	-3.68275	2554,2555,2556,2558,2562,2566	GABRA1,GABRA2,GABRA3,GABRA5,GABRB3,GABRG2	6/144
9_Member	GO Cellular Components	GO:0099572	postsynaptic specialization	-4.91703	-3.36059	1020,2554,2555,2558,2562,2566,2915,6790	CDK5,GABRA1,GABRA2,GABRA5,GABRB3,GABRG2,GRM5,AURKA	8/352
9_Member	GO Molecular Functions	GO:1904315	transmitter-gated monoatomic ion channel activity involved in regulation of postsynaptic membrane potential	-4.6841	-3.15295	2554,2555,2558,2566	GABRA1,GABRA2,GABRA5,GABRG2	4/53
9_Member	GO Cellular Components	GO:0045211	postsynaptic membrane	-4.62433	-3.10173	2554,2555,2556,2558,2562,2566,2915	GABRA1,GABRA2,GABRA3,GABRA5,GABRB3,GABRG2,GRM5	7/280
9_Member	GO Molecular Functions	GO:0099529	neurotransmitter receptor activity involved in regulation of postsynaptic membrane potential	-4.61989	-3.10054	2554,2555,2558,2566	GABRA1,GABRA2,GABRA5,GABRG2	4/55
9_Member	GO Biological Processes	GO:0034329	cell junction assembly	-4.57525	-3.06549	1020,2554,2555,2556,2558,2562,2566	CDK5,GABRA1,GABRA2,GABRA3,GABRA5,GABRB3,GABRG2	7/285
9_Member	KEGG Pathway	hsa04742	Taste transduction	-3.85679	-2.44507	2554,2555,2556,2558	GABRA1,GABRA2,GABRA3,GABRA5	4/86
10_Summary	KEGG Pathway	hsa04914	Progesterone-mediated oocyte maturation	-15.0517	-12.1261	890,891,983,1017,1432,3480,5241,5290,5594,5599,5602,6790,1020,1025,1111,1956,2932,5292,9020,23476,120892,898,4193,836,841,5243,3643,7015,3717,2908,4780,5663,5664,5747,3164,5743,142,2260,2263,3791,2099,7298	CCNA2,CCNB1,CDK1,CDK2,MAPK14,IGF1R,PGR,PIK3CA,MAPK1,MAPK8,MAPK10,AURKA,CDK5,CDK9,CHEK1,EGFR,GSK3B,PIM1,MAP3K14,BRD4,LRRK2,CCNE1,MDM2,CASP3,CASP8,ABCB1,INSR,TERT,JAK2,NR3C1,NFE2L2,PSEN1,PSEN2,PTK2,NR4A1,PTGS2,PARP1,FGFR1,FGFR2,KDR,ESR1,TYMS	42/-
10_Member	KEGG Pathway	hsa04914	Progesterone-mediated oocyte maturation	-15.0517	-12.1261	890,891,983,1017,1432,3480,5241,5290,5594,5599,5602,6790	CCNA2,CCNB1,CDK1,CDK2,MAPK14,IGF1R,PGR,PIK3CA,MAPK1,MAPK8,MAPK10,AURKA	12/111
10_Member	GO Molecular Functions	GO:0004674	protein serine/threonine kinase activity	-13.8839	-11.1282	983,1017,1020,1025,1111,1432,1956,2932,5290,5292,5594,5599,5602,6790,9020,23476,120892	CDK1,CDK2,CDK5,CDK9,CHEK1,MAPK14,EGFR,GSK3B,PIK3CA,PIM1,MAPK1,MAPK8,MAPK10,AURKA,MAP3K14,BRD4,LRRK2	17/427
10_Member	GO Molecular Functions	GO:0106310	protein serine kinase activity	-12.502	-9.86289	983,1017,1020,1025,1111,1432,2932,5290,5292,5594,5599,5602,6790,9020,120892	CDK1,CDK2,CDK5,CDK9,CHEK1,MAPK14,GSK3B,PIK3CA,PIM1,MAPK1,MAPK8,MAPK10,AURKA,MAP3K14,LRRK2	15/363
10_Member	KEGG Pathway	hsa04218	Cellular senescence	-10.2864	-8.01523	890,891,898,983,1017,1111,1432,4193,5290,5594	CCNA2,CCNB1,CCNE1,CDK1,CDK2,CHEK1,MAPK14,MDM2,PIK3CA,MAPK1	10/157
10_Member	KEGG Pathway	hsa04115	p53 signaling pathway	-10.1256	-7.87922	836,841,891,898,983,1017,1111,4193	CASP3,CASP8,CCNB1,CCNE1,CDK1,CDK2,CHEK1,MDM2	8/75
10_Member	GO Biological Processes	GO:0000086	G2/M transition of mitotic cell cycle	-9.83932	-7.61645	890,891,983,1017,1111,5243,6790	CCNA2,CCNB1,CDK1,CDK2,CHEK1,ABCB1,AURKA	7/49
10_Member	GO Biological Processes	GO:0044839	cell cycle G2/M phase transition	-9.53043	-7.33431	890,891,983,1017,1111,5243,6790	CCNA2,CCNB1,CDK1,CDK2,CHEK1,ABCB1,AURKA	7/54
10_Member	GO Biological Processes	GO:0018107	peptidyl-threonine phosphorylation	-9.47237	-7.28702	983,1020,1111,2932,5594,5599,120892	CDK1,CDK5,CHEK1,GSK3B,MAPK1,MAPK8,LRRK2	7/55
10_Member	GO Cellular Components	GO:0000307	cyclin-dependent protein kinase holoenzyme complex	-9.41545	-7.23308	890,891,898,983,1017,1020,1025	CCNA2,CCNB1,CCNE1,CDK1,CDK2,CDK5,CDK9	7/56
10_Member	KEGG Pathway	hsa04114	Oocyte meiosis	-9.36533	-7.19179	891,898,983,1017,1432,3480,5241,5594,6790	CCNB1,CCNE1,CDK1,CDK2,MAPK14,IGF1R,PGR,MAPK1,AURKA	9/139
10_Member	GO Cellular Components	GO:1902911	protein kinase complex	-9.07084	-6.9587	890,891,898,983,1017,1020,1025,3480,3643	CCNA2,CCNB1,CCNE1,CDK1,CDK2,CDK5,CDK9,IGF1R,INSR	9/150
10_Member	GO Biological Processes	GO:0018210	peptidyl-threonine modification	-8.94764	-6.85377	983,1020,1111,2932,5594,5599,120892	CDK1,CDK5,CHEK1,GSK3B,MAPK1,MAPK8,LRRK2	7/65
10_Member	GO Biological Processes	GO:0018105	peptidyl-serine phosphorylation	-8.89524	-6.80619	983,1017,1020,1432,2932,5594,5599,6790,120892	CDK1,CDK2,CDK5,MAPK14,GSK3B,MAPK1,MAPK8,AURKA,LRRK2	9/157
10_Member	GO Biological Processes	GO:0018209	peptidyl-serine modification	-8.61289	-6.55842	983,1017,1020,1432,2932,5594,5599,6790,120892	CDK1,CDK2,CDK5,MAPK14,GSK3B,MAPK1,MAPK8,AURKA,LRRK2	9/169
10_Member	GO Cellular Components	GO:0061695	transferase complex, transferring phosphorus-containing groups	-8.53331	-6.48543	890,891,898,983,1017,1020,1025,3480,3643,5290,7015	CCNA2,CCNB1,CCNE1,CDK1,CDK2,CDK5,CDK9,IGF1R,INSR,PIK3CA,TERT	11/312
10_Member	GO Molecular Functions	GO:0035173	histone kinase activity	-8.1305	-6.15647	983,1017,1111,3717,6790	CDK1,CDK2,CHEK1,JAK2,AURKA	5/23
10_Member	GO Biological Processes	GO:0044772	mitotic cell cycle phase transition	-7.80416	-5.87074	890,891,898,983,1017,1111,5243,6790	CCNA2,CCNB1,CCNE1,CDK1,CDK2,CHEK1,ABCB1,AURKA	8/146
10_Member	KEGG Pathway	hsa04110	Cell cycle	-7.53603	-5.64415	890,891,898,983,1017,1111,2932,4193	CCNA2,CCNB1,CCNE1,CDK1,CDK2,CHEK1,GSK3B,MDM2	8/158
10_Member	GO Biological Processes	GO:0044770	cell cycle phase transition	-7.51468	-5.62432	890,891,898,983,1017,1111,5243,6790	CCNA2,CCNB1,CCNE1,CDK1,CDK2,CHEK1,ABCB1,AURKA	8/159
10_Member	GO Cellular Components	GO:0005813	centrosome	-7.31542	-5.46424	890,891,898,983,1017,1111,2908,2932,4780,5594,5663,5664,5747,6790	CCNA2,CCNB1,CCNE1,CDK1,CDK2,CHEK1,NR3C1,GSK3B,NFE2L2,MAPK1,PSEN1,PSEN2,PTK2,AURKA	14/737
10_Member	GO Cellular Components	GO:1902554	serine/threonine protein kinase complex	-6.70182	-4.93028	890,891,898,983,1017,1020,1025	CCNA2,CCNB1,CCNE1,CDK1,CDK2,CDK5,CDK9	7/136
10_Member	GO Biological Processes	GO:0045786	negative regulation of cell cycle	-6.5695	-4.81384	836,983,1017,1020,1111,1432,1956,3164,4193,5743	CASP3,CDK1,CDK2,CDK5,CHEK1,MAPK14,EGFR,NR4A1,MDM2,PTGS2	10/384
10_Member	GO Biological Processes	GO:0010389	regulation of G2/M transition of mitotic cell cycle	-6.05476	-4.35737	891,983,1017,1111,6790,23476	CCNB1,CDK1,CDK2,CHEK1,AURKA,BRD4	6/106
10_Member	GO Biological Processes	GO:1902749	regulation of cell cycle G2/M phase transition	-5.78149	-4.11601	891,983,1017,1111,6790,23476	CCNB1,CDK1,CDK2,CHEK1,AURKA,BRD4	6/118
10_Member	GO Molecular Functions	GO:0004693	cyclin-dependent protein serine/threonine kinase activity	-5.75087	-4.08899	983,1017,1020,1025	CDK1,CDK2,CDK5,CDK9	4/29
10_Member	GO Molecular Functions	GO:0097472	cyclin-dependent protein kinase activity	-5.75087	-4.08899	983,1017,1020,1025	CDK1,CDK2,CDK5,CDK9	4/29
10_Member	GO Biological Processes	GO:0051054	positive regulation of DNA metabolic process	-5.47663	-3.85337	142,890,983,1017,1956,2260,3480,5594	PARP1,CCNA2,CDK1,CDK2,EGFR,FGFR1,IGF1R,MAPK1	8/295
10_Member	GO Biological Processes	GO:0051052	regulation of DNA metabolic process	-5.47454	-3.85277	142,890,983,1017,1025,1111,1956,2260,3480,5594	PARP1,CCNA2,CDK1,CDK2,CDK9,CHEK1,EGFR,FGFR1,IGF1R,MAPK1	10/508
10_Member	GO Cellular Components	GO:0098687	chromosomal region	-5.40322	-3.78889	142,891,983,1017,1111,5663,5664,6790,7015	PARP1,CCNB1,CDK1,CDK2,CHEK1,PSEN1,PSEN2,AURKA,TERT	9/404
10_Member	GO Biological Processes	GO:0051301	cell division	-5.38512	-3.77239	890,891,898,983,1017,1020,2260,2263,2908,6790	CCNA2,CCNB1,CCNE1,CDK1,CDK2,CDK5,FGFR1,FGFR2,NR3C1,AURKA	10/520
10_Member	GO Biological Processes	GO:0045740	positive regulation of DNA replication	-5.0493	-3.47563	983,1017,1956,2260	CDK1,CDK2,EGFR,FGFR1	4/43
10_Member	GO Biological Processes	GO:0000077	DNA damage checkpoint signaling	-4.62213	-3.10083	983,1017,1111,1432,4193	CDK1,CDK2,CHEK1,MAPK14,MDM2	5/112
10_Member	GO Cellular Components	GO:0000793	condensed chromosome	-4.58499	-3.07371	891,1017,1111,5663,5664,6790,23476	CCNB1,CDK2,CHEK1,PSEN1,PSEN2,AURKA,BRD4	7/284
10_Member	GO Biological Processes	GO:1903047	mitotic cell cycle process	-4.58474	-3.07371	890,891,898,983,1017,1111,4193,5243,6790	CCNA2,CCNB1,CCNE1,CDK1,CDK2,CHEK1,MDM2,ABCB1,AURKA	9/512
10_Member	GO Biological Processes	GO:0006260	DNA replication	-4.46972	-2.97601	142,898,983,1017,1025,1111	PARP1,CCNE1,CDK1,CDK2,CDK9,CHEK1	6/200
10_Member	GO Biological Processes	GO:0031570	DNA integrity checkpoint signaling	-4.46064	-2.96944	983,1017,1111,1432,4193	CDK1,CDK2,CHEK1,MAPK14,MDM2	5/121
10_Member	GO Biological Processes	GO:0006275	regulation of DNA replication	-4.36002	-2.88076	890,983,1017,1956,2260	CCNA2,CDK1,CDK2,EGFR,FGFR1	5/127
10_Member	GO Biological Processes	GO:0000082	G1/S transition of mitotic cell cycle	-4.25495	-2.79302	890,898,983,1017	CCNA2,CCNE1,CDK1,CDK2	4/68
10_Member	GO Biological Processes	GO:0044843	cell cycle G1/S phase transition	-4.20547	-2.74861	890,898,983,1017	CCNA2,CCNE1,CDK1,CDK2	4/70
10_Member	GO Biological Processes	GO:0000278	mitotic cell cycle	-4.08773	-2.64842	890,891,898,983,1017,1111,4193,5243,6790	CCNA2,CCNB1,CCNE1,CDK1,CDK2,CHEK1,MDM2,ABCB1,AURKA	9/594
10_Member	GO Biological Processes	GO:0042770	signal transduction in response to DNA damage	-4.08646	-2.64768	983,1017,1111,1432,4193	CDK1,CDK2,CHEK1,MAPK14,MDM2	5/145
10_Member	GO Biological Processes	GO:0044773	mitotic DNA damage checkpoint signaling	-3.93703	-2.51392	983,1017,1111,4193	CDK1,CDK2,CHEK1,MDM2	4/82
10_Member	GO Biological Processes	GO:0044774	mitotic DNA integrity checkpoint signaling	-3.85679	-2.44507	983,1017,1111,4193	CDK1,CDK2,CHEK1,MDM2	4/86
10_Member	GO Biological Processes	GO:0000075	cell cycle checkpoint signaling	-3.83516	-2.42645	983,1017,1111,1432,4193	CDK1,CDK2,CHEK1,MAPK14,MDM2	5/164
10_Member	GO Cellular Components	GO:0000781	chromosome, telomeric region	-3.72703	-2.33407	142,983,1017,1111,7015	PARP1,CDK1,CDK2,CHEK1,TERT	5/173
10_Member	GO Biological Processes	GO:0000723	telomere maintenance	-3.6381	-2.25893	142,898,1017,7015	PARP1,CCNE1,CDK2,TERT	4/98
10_Member	GO Molecular Functions	GO:0140993	histone modifying activity	-3.34924	-2.00252	983,1017,1111,3717,6790	CDK1,CDK2,CHEK1,JAK2,AURKA	5/209
10_Member	GO Biological Processes	GO:0007093	mitotic cell cycle checkpoint signaling	-3.19784	-1.86563	983,1017,1111,4193	CDK1,CDK2,CHEK1,MDM2	4/128
10_Member	GO Biological Processes	GO:0032200	telomere organization	-3.16012	-1.83126	142,898,1017,7015	PARP1,CCNE1,CDK2,TERT	4/131
10_Member	GO Biological Processes	GO:0045930	negative regulation of mitotic cell cycle	-3.12738	-1.80184	983,1017,1111,1956,4193	CDK1,CDK2,CHEK1,EGFR,MDM2	5/234
10_Member	GO Biological Processes	GO:0010638	positive regulation of organelle organization	-3.02553	-1.71062	983,1017,2932,3643,3791,5594,6790	CDK1,CDK2,GSK3B,INSR,KDR,MAPK1,AURKA	7/511
10_Member	GO Biological Processes	GO:1901988	negative regulation of cell cycle phase transition	-3.02235	-1.70824	983,1017,1111,1432,4193	CDK1,CDK2,CHEK1,MAPK14,MDM2	5/247
10_Member	GO Biological Processes	GO:0033044	regulation of chromosome organization	-3.01453	-1.70083	142,891,983,1017,5594	PARP1,CCNB1,CDK1,CDK2,MAPK1	5/248
10_Member	GO Biological Processes	GO:0006338	chromatin remodeling	-2.95444	-1.64554	983,1017,1025,1111,2099,3717,5290,6790	CDK1,CDK2,CDK9,CHEK1,ESR1,JAK2,PIK3CA,AURKA	8/682
10_Member	GO Biological Processes	GO:0006259	DNA metabolic process	-2.75326	-1.46647	142,898,983,1017,1025,1111,7015,7298	PARP1,CCNE1,CDK1,CDK2,CDK9,CHEK1,TERT,TYMS	8/734
10_Member	GO Biological Processes	GO:0010948	negative regulation of cell cycle process	-2.70238	-1.42011	983,1017,1111,1432,4193	CDK1,CDK2,CHEK1,MAPK14,MDM2	5/292
10_Member	GO Cellular Components	GO:0005819	spindle	-2.67838	-1.39686	891,983,1432,2908,5594,6790	CCNB1,CDK1,MAPK14,NR3C1,MAPK1,AURKA	6/434
10_Member	GO Biological Processes	GO:1901991	negative regulation of mitotic cell cycle phase transition	-2.62554	-1.349	983,1017,1111,4193	CDK1,CDK2,CHEK1,MDM2	4/183
10_Member	GO Biological Processes	GO:0007098	centrosome cycle	-2.52813	-1.26599	983,1017,6790	CDK1,CDK2,AURKA	3/94
10_Member	GO Biological Processes	GO:0051276	chromosome organization	-2.4145	-1.1619	142,891,898,983,1017,7015	PARP1,CCNB1,CCNE1,CDK1,CDK2,TERT	6/491
10_Member	GO Biological Processes	GO:0031023	microtubule organizing center organization	-2.35865	-1.11402	983,1017,6790	CDK1,CDK2,AURKA	3/108
10_Member	GO Biological Processes	GO:2001252	positive regulation of chromosome organization	-2.34747	-1.10421	983,1017,5594	CDK1,CDK2,MAPK1	3/109
11_Summary	GO Biological Processes	GO:0003013	circulatory system process	-15.0061	-12.1066	846,1268,1584,1585,1956,3643,3741,3753,3784,5243,5290,5468,5724,5742,5743,7134,7137,7139,10060,142,1588,2260,3164,4193,120892,8644	CASR,CNR1,CYP11B1,CYP11B2,EGFR,INSR,KCNA5,KCNE1,KCNQ1,ABCB1,PIK3CA,PPARG,PTAFR,PTGS1,PTGS2,TNNC1,TNNI3,TNNT2,ABCC9,PARP1,CYP19A1,FGFR1,NR4A1,MDM2,LRRK2,AKR1C3	26/-
11_Member	GO Biological Processes	GO:0003013	circulatory system process	-15.0061	-12.1066	846,1268,1584,1585,1956,3643,3741,3753,3784,5243,5290,5468,5724,5742,5743,7134,7137,7139,10060	CASR,CNR1,CYP11B1,CYP11B2,EGFR,INSR,KCNA5,KCNE1,KCNQ1,ABCB1,PIK3CA,PPARG,PTAFR,PTGS1,PTGS2,TNNC1,TNNI3,TNNT2,ABCC9	19/509
11_Member	GO Biological Processes	GO:0008015	blood circulation	-14.018	-11.2276	846,1268,1584,1585,1956,3741,3753,3784,5290,5468,5724,5742,5743,7134,7137,7139,10060	CASR,CNR1,CYP11B1,CYP11B2,EGFR,KCNA5,KCNE1,KCNQ1,PIK3CA,PPARG,PTAFR,PTGS1,PTGS2,TNNC1,TNNI3,TNNT2,ABCC9	17/419
11_Member	GO Biological Processes	GO:0044057	regulation of system process	-12.9623	-10.2877	142,846,1588,1956,2260,3164,3741,3753,3784,4193,5468,5724,5743,7134,7137,7139,10060,120892	PARP1,CASR,CYP19A1,EGFR,FGFR1,NR4A1,KCNA5,KCNE1,KCNQ1,MDM2,PPARG,PTAFR,PTGS2,TNNC1,TNNI3,TNNT2,ABCC9,LRRK2	18/571
11_Member	GO Biological Processes	GO:0008217	regulation of blood pressure	-9.53835	-7.33776	1268,1584,1585,3784,5468,5724,5742,5743,7137,10060	CNR1,CYP11B1,CYP11B2,KCNQ1,PPARG,PTAFR,PTGS1,PTGS2,TNNI3,ABCC9	10/187
11_Member	GO Biological Processes	GO:0090257	regulation of muscle system process	-7.10887	-5.28719	142,3164,3784,5468,5724,5743,7134,7137,7139	PARP1,NR4A1,KCNQ1,PPARG,PTAFR,PTGS2,TNNC1,TNNI3,TNNT2	9/252
11_Member	GO Biological Processes	GO:0006937	regulation of muscle contraction	-6.01176	-4.32114	3164,3784,5724,5743,7134,7137,7139	NR4A1,KCNQ1,PTAFR,PTGS2,TNNC1,TNNI3,TNNT2	7/172
11_Member	GO Biological Processes	GO:0070542	response to fatty acid	-4.58871	-3.07641	5290,5724,5743,8644	PIK3CA,PTAFR,PTGS2,AKR1C3	4/56
11_Member	GO Biological Processes	GO:0006940	regulation of smooth muscle contraction	-3.06792	-1.74732	5724,5743,7137	PTAFR,PTGS2,TNNI3	3/61
12_Summary	GO Biological Processes	GO:1903829	positive regulation of protein localization	-14.172	-11.3438	142,846,983,1020,1025,1432,1956,2932,3716,3717,3767,4193,5290,5468,5663,5743,7015,7297,240,1268,3741,3753,120892,5594,7134	PARP1,CASR,CDK1,CDK5,CDK9,MAPK14,EGFR,GSK3B,JAK1,JAK2,KCNJ11,MDM2,PIK3CA,PPARG,PSEN1,PTGS2,TERT,TYK2,ALOX5,CNR1,KCNA5,KCNE1,LRRK2,MAPK1,TNNC1	25/-
12_Member	GO Biological Processes	GO:1903829	positive regulation of protein localization	-14.172	-11.3438	142,846,983,1020,1025,1432,1956,2932,3716,3717,3767,4193,5290,5468,5663,5743,7015,7297	PARP1,CASR,CDK1,CDK5,CDK9,MAPK14,EGFR,GSK3B,JAK1,JAK2,KCNJ11,MDM2,PIK3CA,PPARG,PSEN1,PTGS2,TERT,TYK2	18/485
12_Member	GO Biological Processes	GO:0070201	regulation of establishment of protein localization	-12.2885	-9.69764	240,846,983,1020,1268,1432,1956,2932,3717,3741,3753,3767,4193,5468,5663,5743,120892	ALOX5,CASR,CDK1,CDK5,CNR1,MAPK14,EGFR,GSK3B,JAK2,KCNA5,KCNE1,KCNJ11,MDM2,PPARG,PSEN1,PTGS2,LRRK2	17/536
12_Member	GO Biological Processes	GO:0051223	regulation of protein transport	-11.3348	-8.86884	240,846,983,1020,1268,1432,1956,2932,3717,3741,3767,4193,5468,5663,5743	ALOX5,CASR,CDK1,CDK5,CNR1,MAPK14,EGFR,GSK3B,JAK2,KCNA5,KCNJ11,MDM2,PPARG,PSEN1,PTGS2	15/438
12_Member	GO Biological Processes	GO:1900182	positive regulation of protein localization to nucleus	-10.9455	-8.52815	142,983,1432,3716,3717,5663,5743,7015,7297	PARP1,CDK1,MAPK14,JAK1,JAK2,PSEN1,PTGS2,TERT,TYK2	9/93
12_Member	GO Biological Processes	GO:1900180	regulation of protein localization to nucleus	-10.6898	-8.33429	142,983,1432,2932,3716,3717,5663,5743,7015,7297	PARP1,CDK1,MAPK14,GSK3B,JAK1,JAK2,PSEN1,PTGS2,TERT,TYK2	10/143
12_Member	GO Biological Processes	GO:0032386	regulation of intracellular transport	-9.19134	-7.05144	983,1020,1432,2932,3717,4193,5594,5663,5743,7134,120892	CDK1,CDK5,MAPK14,GSK3B,JAK2,MDM2,MAPK1,PSEN1,PTGS2,TNNC1,LRRK2	11/270
12_Member	GO Biological Processes	GO:0046824	positive regulation of nucleocytoplasmic transport	-9.0453	-6.93662	983,1432,2932,3717,4193,5663,5743	CDK1,MAPK14,GSK3B,JAK2,MDM2,PSEN1,PTGS2	7/63
12_Member	GO Biological Processes	GO:0046822	regulation of nucleocytoplasmic transport	-8.62359	-6.5669	983,1020,1432,2932,3717,4193,5663,5743	CDK1,CDK5,MAPK14,GSK3B,JAK2,MDM2,PSEN1,PTGS2	8/115
12_Member	GO Biological Processes	GO:1904951	positive regulation of establishment of protein localization	-8.30767	-6.30925	846,983,1020,1432,1956,2932,3717,4193,5468,5663,5743	CASR,CDK1,CDK5,MAPK14,EGFR,GSK3B,JAK2,MDM2,PPARG,PSEN1,PTGS2	11/328
12_Member	GO Biological Processes	GO:0051222	positive regulation of protein transport	-8.28458	-6.28811	846,983,1432,1956,2932,3717,4193,5468,5663,5743	CASR,CDK1,MAPK14,EGFR,GSK3B,JAK2,MDM2,PPARG,PSEN1,PTGS2	10/252
12_Member	GO Biological Processes	GO:0090316	positive regulation of intracellular protein transport	-7.74715	-5.82694	983,1432,2932,3717,4193,5663,5743	CDK1,MAPK14,GSK3B,JAK2,MDM2,PSEN1,PTGS2	7/96
12_Member	GO Biological Processes	GO:0033157	regulation of intracellular protein transport	-7.71223	-5.79848	983,1020,1432,2932,3717,4193,5663,5743	CDK1,CDK5,MAPK14,GSK3B,JAK2,MDM2,PSEN1,PTGS2	8/150
12_Member	GO Biological Processes	GO:0042307	positive regulation of protein import into nucleus	-6.85689	-5.06647	983,1432,3717,5663,5743	CDK1,MAPK14,JAK2,PSEN1,PTGS2	5/40
12_Member	GO Biological Processes	GO:0032388	positive regulation of intracellular transport	-6.59492	-4.83207	983,1432,2932,3717,4193,5663,5743	CDK1,MAPK14,GSK3B,JAK2,MDM2,PSEN1,PTGS2	7/141
12_Member	GO Biological Processes	GO:0042306	regulation of protein import into nucleus	-5.99531	-4.30617	983,1432,3717,5663,5743	CDK1,MAPK14,JAK2,PSEN1,PTGS2	5/59
13_Summary	GO Biological Processes	GO:0007507	heart development	-14.063	-11.2604	836,840,841,983,2260,2263,3480,3643,3767,3784,3791,4193,5594,5663,5747,7134,7137,7139,10060,1020,1432,3164,1956,120892	CASP3,CASP7,CASP8,CDK1,FGFR1,FGFR2,IGF1R,INSR,KCNJ11,KCNQ1,KDR,MDM2,MAPK1,PSEN1,PTK2,TNNC1,TNNI3,TNNT2,ABCC9,CDK5,MAPK14,NR4A1,EGFR,LRRK2	24/-
13_Member	GO Biological Processes	GO:0007507	heart development	-14.063	-11.2604	836,840,841,983,2260,2263,3480,3643,3767,3784,3791,4193,5594,5663,5747,7134,7137,7139,10060	CASP3,CASP7,CASP8,CDK1,FGFR1,FGFR2,IGF1R,INSR,KCNJ11,KCNQ1,KDR,MDM2,MAPK1,PSEN1,PTK2,TNNC1,TNNI3,TNNT2,ABCC9	19/574
13_Member	GO Cellular Components	GO:1990584	cardiac Troponin complex	-7.5688	-5.67233	7134,7137,7139	TNNC1,TNNI3,TNNT2	3/3
13_Member	GO Biological Processes	GO:0003007	heart morphogenesis	-6.93702	-5.13684	2263,3643,4193,5663,5747,7134,7137,7139,10060	FGFR2,INSR,MDM2,PSEN1,PTK2,TNNC1,TNNI3,TNNT2,ABCC9	9/264
13_Member	GO Biological Processes	GO:0060537	muscle tissue development	-6.90638	-5.10988	983,1020,1432,2260,2263,3164,3767,7134,7137,7139	CDK1,CDK5,MAPK14,FGFR1,FGFR2,NR4A1,KCNJ11,TNNC1,TNNI3,TNNT2	10/353
13_Member	GO Biological Processes	GO:0003229	ventricular cardiac muscle tissue development	-5.8521	-4.18115	2263,3767,7134,7137,7139	FGFR2,KCNJ11,TNNC1,TNNI3,TNNT2	5/63
13_Member	GO Cellular Components	GO:0005861	troponin complex	-5.65026	-4.00251	7134,7137,7139	TNNC1,TNNI3,TNNT2	3/9
13_Member	GO Biological Processes	GO:0048738	cardiac muscle tissue development	-5.60434	-3.96688	983,2260,2263,3767,7134,7137,7139	CDK1,FGFR1,FGFR2,KCNJ11,TNNC1,TNNI3,TNNT2	7/198
13_Member	GO Biological Processes	GO:0014706	striated muscle tissue development	-5.51858	-3.89119	983,2260,2263,3767,7134,7137,7139	CDK1,FGFR1,FGFR2,KCNJ11,TNNC1,TNNI3,TNNT2	7/204
13_Member	GO Biological Processes	GO:0061061	muscle structure development	-5.35584	-3.75105	836,840,983,1020,1432,2263,3164,7134,7137,7139	CASP3,CASP7,CDK1,CDK5,MAPK14,FGFR2,NR4A1,TNNC1,TNNI3,TNNT2	10/524
13_Member	GO Biological Processes	GO:0055010	ventricular cardiac muscle tissue morphogenesis	-4.89336	-3.34043	2263,7134,7137,7139	FGFR2,TNNC1,TNNI3,TNNT2	4/47
13_Member	GO Biological Processes	GO:0003205	cardiac chamber development	-4.86751	-3.31806	2263,3480,4193,7134,7137,7139	FGFR2,IGF1R,MDM2,TNNC1,TNNI3,TNNT2	6/170
13_Member	GO Biological Processes	GO:0055008	cardiac muscle tissue morphogenesis	-4.4412	-2.95301	2263,7134,7137,7139	FGFR2,TNNC1,TNNI3,TNNT2	4/61
13_Member	GO Cellular Components	GO:0005865	striated muscle thin filament	-4.39944	-2.91723	7134,7137,7139	TNNC1,TNNI3,TNNT2	3/22
13_Member	GO Biological Processes	GO:0003206	cardiac chamber morphogenesis	-4.34375	-2.86625	2263,4193,7134,7137,7139	FGFR2,MDM2,TNNC1,TNNI3,TNNT2	5/128
13_Member	GO Biological Processes	GO:0003231	cardiac ventricle development	-4.32761	-2.85421	2263,4193,7134,7137,7139	FGFR2,MDM2,TNNC1,TNNI3,TNNT2	5/129
13_Member	GO Biological Processes	GO:0007517	muscle organ development	-4.29977	-2.82926	1020,1432,2263,3164,7134,7137,7139	CDK5,MAPK14,FGFR2,NR4A1,TNNC1,TNNI3,TNNT2	7/315
13_Member	GO Biological Processes	GO:0003208	cardiac ventricle morphogenesis	-4.18129	-2.72499	2263,7134,7137,7139	FGFR2,TNNC1,TNNI3,TNNT2	4/71
13_Member	GO Cellular Components	GO:0036379	myofilament	-4.17581	-2.7234	7134,7137,7139	TNNC1,TNNI3,TNNT2	3/26
13_Member	GO Biological Processes	GO:0060415	muscle tissue morphogenesis	-4.11087	-2.66995	2263,7134,7137,7139	FGFR2,TNNC1,TNNI3,TNNT2	4/74
13_Member	GO Biological Processes	GO:0048644	muscle organ morphogenesis	-3.95775	-2.53167	2263,7134,7137,7139	FGFR2,TNNC1,TNNI3,TNNT2	4/81
13_Member	GO Biological Processes	GO:0043462	regulation of ATP-dependent activity	-3.04733	-1.73039	7134,7137,7139	TNNC1,TNNI3,TNNT2	3/62
13_Member	GO Molecular Functions	GO:0003779	actin binding	-2.67339	-1.39224	1956,5747,7134,7137,7139,120892	EGFR,PTK2,TNNC1,TNNI3,TNNT2,LRRK2	6/435
13_Member	KEGG Pathway	hsa04260	Cardiac muscle contraction	-2.62347	-1.349	7134,7137,7139	TNNC1,TNNI3,TNNT2	3/87
13_Member	KEGG Pathway	hsa05410	Hypertrophic cardiomyopathy	-2.46463	-1.20816	7134,7137,7139	TNNC1,TNNI3,TNNT2	3/99
13_Member	KEGG Pathway	hsa05414	Dilated cardiomyopathy	-2.39287	-1.1434	7134,7137,7139	TNNC1,TNNI3,TNNT2	3/105
14_Summary	GO Molecular Functions	GO:0019900	kinase binding	-13.6405	-10.8958	142,834,846,890,891,898,1025,1432,1956,2099,2908,2915,2932,3717,3741,3784,5599,5724,5747,6790,7137	PARP1,CASP1,CASR,CCNA2,CCNB1,CCNE1,CDK9,MAPK14,EGFR,ESR1,NR3C1,GRM5,GSK3B,JAK2,KCNA5,KCNQ1,MAPK8,PTAFR,PTK2,AURKA,TNNI3	21/-
14_Member	GO Molecular Functions	GO:0019900	kinase binding	-13.6405	-10.8958	142,834,846,890,891,898,1025,1432,1956,2099,2908,2915,2932,3717,3741,3784,5599,5724,5747,6790,7137	PARP1,CASP1,CASR,CCNA2,CCNB1,CCNE1,CDK9,MAPK14,EGFR,ESR1,NR3C1,GRM5,GSK3B,JAK2,KCNA5,KCNQ1,MAPK8,PTAFR,PTK2,AURKA,TNNI3	21/794
14_Member	GO Molecular Functions	GO:0019901	protein kinase binding	-13.4352	-10.7117	142,846,890,891,898,1025,1432,1956,2099,2908,2915,2932,3717,3741,3784,5599,5724,5747,6790,7137	PARP1,CASR,CCNA2,CCNB1,CCNE1,CDK9,MAPK14,EGFR,ESR1,NR3C1,GRM5,GSK3B,JAK2,KCNA5,KCNQ1,MAPK8,PTAFR,PTK2,AURKA,TNNI3	20/715
15_Summary	GO Biological Processes	GO:0010817	regulation of hormone levels	-13.3603	-10.647	231,240,846,1268,1584,1585,1588,1956,2099,2260,2908,3480,3717,3741,3767,3784,5468,8644,1020,1066,5724,120892,3643,5243,5743,10060,2932,5290,7139,3791,5747,2263,6790	AKR1B1,ALOX5,CASR,CNR1,CYP11B1,CYP11B2,CYP19A1,EGFR,ESR1,FGFR1,NR3C1,IGF1R,JAK2,KCNA5,KCNJ11,KCNQ1,PPARG,AKR1C3,CDK5,CES1,PTAFR,LRRK2,INSR,ABCB1,PTGS2,ABCC9,GSK3B,PIK3CA,TNNT2,KDR,PTK2,FGFR2,AURKA	33/-
15_Member	GO Biological Processes	GO:0010817	regulation of hormone levels	-13.3603	-10.647	231,240,846,1268,1584,1585,1588,1956,2099,2260,2908,3480,3717,3741,3767,3784,5468,8644	AKR1B1,ALOX5,CASR,CNR1,CYP11B1,CYP11B2,CYP19A1,EGFR,ESR1,FGFR1,NR3C1,IGF1R,JAK2,KCNA5,KCNJ11,KCNQ1,PPARG,AKR1C3	18/541
15_Member	GO Biological Processes	GO:0051046	regulation of secretion	-9.3563	-7.18566	240,846,1020,1066,1268,1588,1956,2260,3717,3741,3767,3784,5468,5724,120892	ALOX5,CASR,CDK5,CES1,CNR1,CYP19A1,EGFR,FGFR1,JAK2,KCNA5,KCNJ11,KCNQ1,PPARG,PTAFR,LRRK2	15/607
15_Member	GO Biological Processes	GO:0046883	regulation of hormone secretion	-8.23547	-6.24477	240,846,1268,1588,1956,2260,3717,3741,3767,5468	ALOX5,CASR,CNR1,CYP19A1,EGFR,FGFR1,JAK2,KCNA5,KCNJ11,PPARG	10/255
15_Member	GO Biological Processes	GO:1903530	regulation of secretion by cell	-7.89269	-5.94391	240,846,1020,1268,1588,1956,2260,3717,3741,3767,5468,5724,120892	ALOX5,CASR,CDK5,CNR1,CYP19A1,EGFR,FGFR1,JAK2,KCNA5,KCNJ11,PPARG,PTAFR,LRRK2	13/553
15_Member	GO Biological Processes	GO:0050708	regulation of protein secretion	-5.80972	-4.14242	240,846,1268,1956,3717,3741,3767,5468	ALOX5,CASR,CNR1,EGFR,JAK2,KCNA5,KCNJ11,PPARG	8/266
15_Member	GO Biological Processes	GO:0090276	regulation of peptide hormone secretion	-5.60434	-3.96688	240,846,1268,1956,3717,3741,3767	ALOX5,CASR,CNR1,EGFR,JAK2,KCNA5,KCNJ11	7/198
15_Member	GO Biological Processes	GO:0002791	regulation of peptide secretion	-5.56111	-3.92788	240,846,1268,1956,3717,3741,3767	ALOX5,CASR,CNR1,EGFR,JAK2,KCNA5,KCNJ11	7/201
15_Member	GO Biological Processes	GO:0090087	regulation of peptide transport	-5.56111	-3.92788	240,846,1268,1956,3717,3741,3767	ALOX5,CASR,CNR1,EGFR,JAK2,KCNA5,KCNJ11	7/201
15_Member	GO Biological Processes	GO:1903532	positive regulation of secretion by cell	-5.52036	-3.89131	846,1020,1588,1956,2260,3717,5468,5724	CASR,CDK5,CYP19A1,EGFR,FGFR1,JAK2,PPARG,PTAFR	8/291
15_Member	GO Biological Processes	GO:0051047	positive regulation of secretion	-5.28769	-3.68916	846,1020,1588,1956,2260,3717,5468,5724	CASR,CDK5,CYP19A1,EGFR,FGFR1,JAK2,PPARG,PTAFR	8/313
15_Member	GO Biological Processes	GO:0046887	positive regulation of hormone secretion	-5.27974	-3.68275	846,1588,1956,2260,3717,5468	CASR,CYP19A1,EGFR,FGFR1,JAK2,PPARG	6/144
15_Member	GO Biological Processes	GO:0050796	regulation of insulin secretion	-4.89671	-3.34272	240,846,1268,3717,3741,3767	ALOX5,CASR,CNR1,JAK2,KCNA5,KCNJ11	6/168
15_Member	GO Biological Processes	GO:0003018	vascular process in circulatory system	-4.68453	-3.15295	846,1956,3643,3741,5243,5743,10060	CASR,EGFR,INSR,KCNA5,ABCB1,PTGS2,ABCC9	7/274
15_Member	GO Biological Processes	GO:0019229	regulation of vasoconstriction	-4.25495	-2.79302	846,1956,3741,5743	CASR,EGFR,KCNA5,PTGS2	4/68
15_Member	GO Biological Processes	GO:0045907	positive regulation of vasoconstriction	-3.86058	-2.44734	846,1956,5743	CASR,EGFR,PTGS2	3/33
15_Member	GO Biological Processes	GO:0090066	regulation of anatomical structure size	-3.83946	-2.42925	846,1020,1956,2932,3741,5290,5743,120892	CASR,CDK5,EGFR,GSK3B,KCNA5,PIK3CA,PTGS2,LRRK2	8/501
15_Member	GO Biological Processes	GO:0051592	response to calcium ion	-3.14775	-1.82097	846,1956,7139,8644	CASR,EGFR,TNNT2,AKR1C3	4/132
15_Member	GO Biological Processes	GO:0050714	positive regulation of protein secretion	-2.97372	-1.66362	846,1956,3717,5468	CASR,EGFR,JAK2,PPARG	4/147
15_Member	GO Biological Processes	GO:0035296	regulation of tube diameter	-2.9095	-1.60575	846,1956,3741,5743	CASR,EGFR,KCNA5,PTGS2	4/153
15_Member	GO Biological Processes	GO:0097746	blood vessel diameter maintenance	-2.9095	-1.60575	846,1956,3741,5743	CASR,EGFR,KCNA5,PTGS2	4/153
15_Member	GO Biological Processes	GO:0035150	regulation of tube size	-2.89907	-1.59571	846,1956,3741,5743	CASR,EGFR,KCNA5,PTGS2	4/154
15_Member	GO Molecular Functions	GO:0005178	integrin binding	-2.85808	-1.55902	846,1956,3791,5747	CASR,EGFR,KDR,PTK2	4/158
15_Member	GO Biological Processes	GO:0070374	positive regulation of ERK1 and ERK2 cascade	-2.53426	-1.27104	846,1956,2263,3791	CASR,EGFR,FGFR2,KDR	4/194
15_Member	GO Biological Processes	GO:0090277	positive regulation of peptide hormone secretion	-2.32545	-1.08492	846,1956,3717	CASR,EGFR,JAK2	3/111
15_Member	GO Biological Processes	GO:0002793	positive regulation of peptide secretion	-2.30386	-1.0657	846,1956,3717	CASR,EGFR,JAK2	3/113
15_Member	GO Cellular Components	GO:0016323	basolateral plasma membrane	-2.09911	-0.876568	846,1956,3784,6790	CASR,EGFR,KCNQ1,AURKA	4/258
16_Summary	GO Biological Processes	GO:0043068	positive regulation of programmed cell death	-12.9623	-10.2877	142,836,839,840,841,1020,1268,2908,3164,3717,4170,5468,5599,5663,5743,7421,8644,120892,3791,5290,7015,890,1111,3480,4193,834,5664,240,1956,4780,5724,4312,983,1432,7139	PARP1,CASP3,CASP6,CASP7,CASP8,CDK5,CNR1,NR3C1,NR4A1,JAK2,MCL1,PPARG,MAPK8,PSEN1,PTGS2,VDR,AKR1C3,LRRK2,KDR,PIK3CA,TERT,CCNA2,CHEK1,IGF1R,MDM2,CASP1,PSEN2,ALOX5,EGFR,NFE2L2,PTAFR,MMP1,CDK1,MAPK14,TNNT2	35/-
16_Member	GO Biological Processes	GO:0043068	positive regulation of programmed cell death	-12.9623	-10.2877	142,836,839,840,841,1020,1268,2908,3164,3717,4170,5468,5599,5663,5743,7421,8644,120892	PARP1,CASP3,CASP6,CASP7,CASP8,CDK5,CNR1,NR3C1,NR4A1,JAK2,MCL1,PPARG,MAPK8,PSEN1,PTGS2,VDR,AKR1C3,LRRK2	18/571
16_Member	GO Biological Processes	GO:0043523	regulation of neuron apoptotic process	-12.2417	-9.65845	142,836,839,840,841,1020,2908,3717,3791,4170,5290,5663,7015	PARP1,CASP3,CASP6,CASP7,CASP8,CDK5,NR3C1,JAK2,KDR,MCL1,PIK3CA,PSEN1,TERT	13/245
16_Member	GO Biological Processes	GO:0043065	positive regulation of apoptotic process	-10.9885	-8.56609	836,839,840,841,1020,1268,2908,3164,3717,4170,5468,5599,5663,5743,7421,8644	CASP3,CASP6,CASP7,CASP8,CDK5,CNR1,NR3C1,NR4A1,JAK2,MCL1,PPARG,MAPK8,PSEN1,PTGS2,VDR,AKR1C3	16/552
16_Member	GO Biological Processes	GO:0043279	response to alkaloid	-10.6173	-8.27921	836,839,840,890,1020,1111,1268,3480,4193	CASP3,CASP6,CASP7,CCNA2,CDK5,CHEK1,CNR1,IGF1R,MDM2	9/101
16_Member	GO Biological Processes	GO:0043525	positive regulation of neuron apoptotic process	-8.80705	-6.73908	836,839,840,841,1020,2908,4170	CASP3,CASP6,CASP7,CASP8,CDK5,NR3C1,MCL1	7/68
16_Member	GO Biological Processes	GO:0071312	cellular response to alkaloid	-8.70245	-6.63903	836,839,840,890,1111,4193	CASP3,CASP6,CASP7,CCNA2,CHEK1,MDM2	6/39
16_Member	GO Molecular Functions	GO:0097153	cysteine-type endopeptidase activity involved in apoptotic process	-8.00602	-6.0449	836,839,840,841	CASP3,CASP6,CASP7,CASP8	4/9
16_Member	GO Biological Processes	GO:0016485	protein processing	-6.89863	-5.10336	142,834,836,839,840,841,5663,5664	PARP1,CASP1,CASP3,CASP6,CASP7,CASP8,PSEN1,PSEN2	8/191
16_Member	GO Biological Processes	GO:0006954	inflammatory response	-6.72366	-4.94981	240,834,836,839,841,1956,2908,3164,3717,4780,5663,5724	ALOX5,CASP1,CASP3,CASP6,CASP8,EGFR,NR3C1,NR4A1,JAK2,NFE2L2,PSEN1,PTAFR	12/579
16_Member	GO Biological Processes	GO:0072733	response to staurosporine	-6.57072	-4.81394	836,839,840	CASP3,CASP6,CASP7	3/5
16_Member	GO Biological Processes	GO:0072734	cellular response to staurosporine	-6.57072	-4.81394	836,839,840	CASP3,CASP6,CASP7	3/5
16_Member	GO Molecular Functions	GO:0097200	cysteine-type endopeptidase activity involved in execution phase of apoptosis	-6.57072	-4.81394	836,839,840	CASP3,CASP6,CASP7	3/5
16_Member	GO Biological Processes	GO:0070269	pyroptotic inflammatory response	-5.57375	-3.93883	834,836,839,841	CASP1,CASP3,CASP6,CASP8	4/32
16_Member	GO Molecular Functions	GO:0004190	aspartic-type endopeptidase activity	-5.36345	-3.75392	836,840,5663,5664	CASP3,CASP7,PSEN1,PSEN2	4/36
16_Member	GO Molecular Functions	GO:0070001	aspartic-type peptidase activity	-5.31477	-3.71386	836,840,5663,5664	CASP3,CASP7,PSEN1,PSEN2	4/37
16_Member	GO Molecular Functions	GO:0004197	cysteine-type endopeptidase activity	-5.20589	-3.61732	834,836,839,840,841	CASP1,CASP3,CASP6,CASP7,CASP8	5/85
16_Member	GO Biological Processes	GO:0097194	execution phase of apoptosis	-4.6841	-3.15295	836,839,840,841	CASP3,CASP6,CASP7,CASP8	4/53
16_Member	KEGG Pathway	hsa05134	Legionellosis	-4.58871	-3.07641	834,836,840,841	CASP1,CASP3,CASP7,CASP8	4/56
16_Member	GO Molecular Functions	GO:0004175	endopeptidase activity	-4.53543	-3.03069	834,836,839,840,841,4312,5663,5664	CASP1,CASP3,CASP6,CASP7,CASP8,MMP1,PSEN1,PSEN2	8/398
16_Member	KEGG Pathway	hsa04623	Cytosolic DNA-sensing pathway	-3.91659	-2.49672	834,836,840,841	CASP1,CASP3,CASP7,CASP8	4/83
16_Member	GO Biological Processes	GO:0051604	protein maturation	-3.87522	-2.45893	142,834,836,839,840,841,5663,5664	PARP1,CASP1,CASP3,CASP6,CASP7,CASP8,PSEN1,PSEN2	8/495
16_Member	GO Molecular Functions	GO:0008234	cysteine-type peptidase activity	-3.60299	-2.22893	834,836,839,840,841	CASP1,CASP3,CASP6,CASP7,CASP8	5/184
16_Member	GO Biological Processes	GO:0051402	neuron apoptotic process	-3.4922	-2.13001	836,840,1020,5663	CASP3,CASP7,CDK5,PSEN1	4/107
16_Member	GO Molecular Functions	GO:0008233	peptidase activity	-3.26746	-1.92763	834,836,839,840,841,4312,5663,5664	CASP1,CASP3,CASP6,CASP7,CASP8,MMP1,PSEN1,PSEN2	8/610
16_Member	GO Biological Processes	GO:0051146	striated muscle cell differentiation	-3.18671	-1.85534	836,840,983,1432,7139	CASP3,CASP7,CDK1,MAPK14,TNNT2	5/227
16_Member	GO Biological Processes	GO:0042692	muscle cell differentiation	-2.70886	-1.42546	836,840,983,1432,7139	CASP3,CASP7,CDK1,MAPK14,TNNT2	5/291
17_Summary	KEGG Pathway	hsa05215	Prostate cancer	-12.3491	-9.73481	898,1017,1956,2260,2263,2932,3480,4193,5290,5594,1588,2099,2908,3643,3717,5241,5663,6790,7298,7421,5243,7015,2322,2052,1584,3164,834,839,1268,5599,5724,5747,7297,23476,4780,836,841,3718,5602,1020,3784,1432,5742,3767	CCNE1,CDK2,EGFR,FGFR1,FGFR2,GSK3B,IGF1R,MDM2,PIK3CA,MAPK1,CYP19A1,ESR1,NR3C1,INSR,JAK2,PGR,PSEN1,AURKA,TYMS,VDR,ABCB1,TERT,FLT3,EPHX1,CYP11B1,NR4A1,CASP1,CASP6,CNR1,MAPK8,PTAFR,PTK2,TYK2,BRD4,NFE2L2,CASP3,CASP8,JAK3,MAPK10,CDK5,KCNQ1,MAPK14,PTGS1,KCNJ11	44/-
17_Member	KEGG Pathway	hsa05215	Prostate cancer	-12.3491	-9.73481	898,1017,1956,2260,2263,2932,3480,4193,5290,5594	CCNE1,CDK2,EGFR,FGFR1,FGFR2,GSK3B,IGF1R,MDM2,PIK3CA,MAPK1	10/98
17_Member	GO Biological Processes	GO:0048732	gland development	-11.5207	-9.01909	1588,1956,2099,2260,2263,2908,3643,3717,5241,5290,5594,5663,6790,7298,7421	CYP19A1,EGFR,ESR1,FGFR1,FGFR2,NR3C1,INSR,JAK2,PGR,PIK3CA,MAPK1,PSEN1,AURKA,TYMS,VDR	15/425
17_Member	KEGG Pathway	hsa05226	Gastric cancer	-9.07084	-6.9587	898,1017,1956,2263,2932,5243,5290,5594,7015	CCNE1,CDK2,EGFR,FGFR2,GSK3B,ABCB1,PIK3CA,MAPK1,TERT	9/150
17_Member	KEGG Pathway	hsa05224	Breast cancer	-7.75786	-5.83439	1956,2099,2260,2932,3480,5241,5290,5594	EGFR,ESR1,FGFR1,GSK3B,IGF1R,PGR,PIK3CA,MAPK1	8/148
17_Member	KEGG Pathway	hsa05230	Central carbon metabolism in cancer	-7.0938	-5.27599	1956,2260,2263,2322,5290,5594	EGFR,FGFR1,FGFR2,FLT3,PIK3CA,MAPK1	6/71
17_Member	KEGG Pathway	hsa05218	Melanoma	-7.02087	-5.21197	1956,2260,3480,4193,5290,5594	EGFR,FGFR1,IGF1R,MDM2,PIK3CA,MAPK1	6/73
17_Member	KEGG Pathway	hsa05207	Chemical carcinogenesis - receptor activation	-6.50578	-4.75878	1956,2052,2099,3717,5241,5290,5594,7421	EGFR,EPHX1,ESR1,JAK2,PGR,PIK3CA,MAPK1,VDR	8/215
17_Member	KEGG Pathway	hsa04934	Cushing syndrome	-6.31602	-4.5932	898,1017,1584,1956,2932,3164,5594	CCNE1,CDK2,CYP11B1,EGFR,GSK3B,NR4A1,MAPK1	7/155
17_Member	GO Biological Processes	GO:0050778	positive regulation of immune response	-6.06008	-4.36074	834,839,1268,3717,5290,5594,5599,5663,5724,5747,7297,23476	CASP1,CASP6,CNR1,JAK2,PIK3CA,MAPK1,MAPK8,PSEN1,PTAFR,PTK2,TYK2,BRD4	12/669
17_Member	KEGG Pathway	hsa05225	Hepatocellular carcinoma	-6.04583	-4.35038	1956,2932,3480,4780,5290,5594,7015	EGFR,GSK3B,IGF1R,NFE2L2,PIK3CA,MAPK1,TERT	7/170
17_Member	KEGG Pathway	hsa01524	Platinum drug resistance	-5.4744	-3.85277	836,841,4193,5290,5594	CASP3,CASP8,MDM2,PIK3CA,MAPK1	5/75
17_Member	KEGG Pathway	hsa05214	Glioma	-5.44588	-3.8267	1956,3480,4193,5290,5594	EGFR,IGF1R,MDM2,PIK3CA,MAPK1	5/76
17_Member	KEGG Pathway	hsa04520	Adherens junction	-5.01431	-3.44646	1956,2260,3480,3643,5594	EGFR,FGFR1,IGF1R,INSR,MAPK1	5/93
17_Member	KEGG Pathway	hsa04066	HIF-1 signaling pathway	-4.67908	-3.1486	1956,3480,3643,5290,5594	EGFR,IGF1R,INSR,PIK3CA,MAPK1	5/109
17_Member	KEGG Pathway	hsa04062	Chemokine signaling pathway	-4.5564	-3.05104	2932,3717,3718,5290,5594,5747	GSK3B,JAK2,JAK3,PIK3CA,MAPK1,PTK2	6/193
17_Member	KEGG Pathway	hsa05213	Endometrial cancer	-4.49861	-3.00007	1956,2932,5290,5594	EGFR,GSK3B,PIK3CA,MAPK1	4/59
17_Member	KEGG Pathway	hsa04919	Thyroid hormone signaling pathway	-4.4435	-2.95471	2099,2932,4193,5290,5594	ESR1,GSK3B,MDM2,PIK3CA,MAPK1	5/122
17_Member	GO Biological Processes	GO:0038127	ERBB signaling pathway	-4.33215	-2.857	1956,5290,5594,5747	EGFR,PIK3CA,MAPK1,PTK2	4/65
17_Member	KEGG Pathway	hsa04915	Estrogen signaling pathway	-4.17335	-2.72164	1956,2099,5241,5290,5594	EGFR,ESR1,PGR,PIK3CA,MAPK1	5/139
17_Member	KEGG Pathway	hsa05223	Non-small cell lung cancer	-4.134	-2.68655	1956,3718,5290,5594	EGFR,JAK3,PIK3CA,MAPK1	4/73
17_Member	KEGG Pathway	hsa04810	Regulation of actin cytoskeleton	-4.13275	-2.68585	1956,2260,2263,5290,5594,5747	EGFR,FGFR1,FGFR2,PIK3CA,MAPK1,PTK2	6/230
17_Member	GO Biological Processes	GO:0048009	insulin-like growth factor receptor signaling pathway	-3.90102	-2.48269	3480,5290,5594	IGF1R,PIK3CA,MAPK1	3/32
17_Member	GO Biological Processes	GO:0002764	immune response-regulating signaling pathway	-3.74492	-2.34823	834,5290,5594,5599,5602,5663,5747	CASP1,PIK3CA,MAPK1,MAPK8,MAPK10,PSEN1,PTK2	7/387
17_Member	GO Biological Processes	GO:0002768	immune response-regulating cell surface receptor signaling pathway	-3.64267	-2.26216	5290,5594,5599,5602,5663,5747	PIK3CA,MAPK1,MAPK8,MAPK10,PSEN1,PTK2	6/283
17_Member	KEGG Pathway	hsa04360	Axon guidance	-3.60299	-2.22893	1020,2932,5290,5594,5747	CDK5,GSK3B,PIK3CA,MAPK1,PTK2	5/184
17_Member	KEGG Pathway	hsa04725	Cholinergic synapse	-3.37323	-2.0252	3717,3784,5290,5594	JAK2,KCNQ1,PIK3CA,MAPK1	4/115
17_Member	GO Biological Processes	GO:0007173	epidermal growth factor receptor signaling pathway	-3.34731	-2.00102	1956,5290,5747	EGFR,PIK3CA,PTK2	3/49
17_Member	KEGG Pathway	hsa04611	Platelet activation	-3.23653	-1.90096	1432,5290,5594,5742	MAPK14,PIK3CA,MAPK1,PTGS1	4/125
17_Member	KEGG Pathway	hsa04929	GnRH secretion	-2.98762	-1.67632	3767,5290,5594	KCNJ11,PIK3CA,MAPK1	3/65
17_Member	GO Biological Processes	GO:0002253	activation of immune response	-2.92979	-1.62367	834,839,5290,5594,5663,5747	CASP1,CASP6,PIK3CA,MAPK1,PSEN1,PTK2	6/387
17_Member	KEGG Pathway	hsa05220	Chronic myeloid leukemia	-2.77507	-1.48639	4193,5290,5594	MDM2,PIK3CA,MAPK1	3/77
17_Member	KEGG Pathway	hsa04662	B cell receptor signaling pathway	-2.56802	-1.30048	2932,5290,5594	GSK3B,PIK3CA,MAPK1	3/91
17_Member	KEGG Pathway	hsa04613	Neutrophil extracellular trap formation	-2.55042	-1.28612	834,1432,5290,5594	CASP1,MAPK14,PIK3CA,MAPK1	4/192
17_Member	GO Biological Processes	GO:0002757	immune response-activating signaling pathway	-2.52513	-1.26369	834,5290,5594,5663,5747	CASP1,PIK3CA,MAPK1,PSEN1,PTK2	5/321
17_Member	GO Biological Processes	GO:0050852	T cell receptor signaling pathway	-2.30386	-1.0657	5290,5594,5663	PIK3CA,MAPK1,PSEN1	3/113
17_Member	GO Biological Processes	GO:0002429	immune response-activating cell surface receptor signaling pathway	-2.1583	-0.930172	5290,5594,5663,5747	PIK3CA,MAPK1,PSEN1,PTK2	4/248
17_Member	KEGG Pathway	hsa04650	Natural killer cell mediated cytotoxicity	-2.09092	-0.869025	836,5290,5594	CASP3,PIK3CA,MAPK1	3/135
18_Summary	GO Biological Processes	GO:0001890	placenta development	-11.9767	-9.41533	142,841,1432,1956,2263,5467,5468,5594,5743,5747,7421,240,2260,3164,3791,5241,5836,8644,7298,836,3717	PARP1,CASP8,MAPK14,EGFR,FGFR2,PPARD,PPARG,MAPK1,PTGS2,PTK2,VDR,ALOX5,FGFR1,NR4A1,KDR,PGR,PYGL,AKR1C3,TYMS,CASP3,JAK2	21/-
18_Member	GO Biological Processes	GO:0001890	placenta development	-11.9767	-9.41533	142,841,1432,1956,2263,5467,5468,5594,5743,5747,7421	PARP1,CASP8,MAPK14,EGFR,FGFR2,PPARD,PPARG,MAPK1,PTGS2,PTK2,VDR	11/149
18_Member	GO Biological Processes	GO:0050678	regulation of epithelial cell proliferation	-6.32889	-4.60335	240,1956,2260,2263,3164,3791,5241,5467,5468,7421	ALOX5,EGFR,FGFR1,FGFR2,NR4A1,KDR,PGR,PPARD,PPARG,VDR	10/408
18_Member	GO Molecular Functions	GO:0032052	bile acid binding	-5.49632	-3.87058	5836,7421,8644	PYGL,VDR,AKR1C3	3/10
18_Member	GO Molecular Functions	GO:0033293	monocarboxylic acid binding	-5.36266	-3.75392	5467,5468,5836,7421,8644	PPARD,PPARG,PYGL,VDR,AKR1C3	5/79
18_Member	GO Molecular Functions	GO:0031406	carboxylic acid binding	-4.65979	-3.13392	5467,5468,5836,7298,7421,8644	PPARD,PPARG,PYGL,TYMS,VDR,AKR1C3	6/185
18_Member	GO Molecular Functions	GO:0043177	organic acid binding	-4.50646	-3.00669	5467,5468,5836,7298,7421,8644	PPARD,PPARG,PYGL,TYMS,VDR,AKR1C3	6/197
18_Member	GO Biological Processes	GO:0050680	negative regulation of epithelial cell proliferation	-3.72703	-2.33407	240,2263,5467,5468,7421	ALOX5,FGFR2,PPARD,PPARG,VDR	5/173
18_Member	GO Biological Processes	GO:0008285	negative regulation of cell population proliferation	-2.55286	-1.28821	240,836,2263,3717,5467,5468,5743,7421	ALOX5,CASP3,FGFR2,JAK2,PPARD,PPARG,PTGS2,VDR	8/791
19_Summary	GO Biological Processes	GO:0071383	cellular response to steroid hormone stimulus	-11.8189	-9.27154	1956,2099,2322,2908,3480,3717,4306,5241,5467,5594,8644,5292,5468,7421,3164,760,836,846,2260,2263,3791,4193,5663,7134,7137,7139,1588,2052,3290,4780	EGFR,ESR1,FLT3,NR3C1,IGF1R,JAK2,NR3C2,PGR,PPARD,MAPK1,AKR1C3,PIM1,PPARG,VDR,NR4A1,CA2,CASP3,CASR,FGFR1,FGFR2,KDR,MDM2,PSEN1,TNNC1,TNNI3,TNNT2,CYP19A1,EPHX1,HSD11B1,NFE2L2	30/-
19_Member	GO Biological Processes	GO:0071383	cellular response to steroid hormone stimulus	-11.8189	-9.27154	1956,2099,2322,2908,3480,3717,4306,5241,5467,5594,8644	EGFR,ESR1,FLT3,NR3C1,IGF1R,JAK2,NR3C2,PGR,PPARD,MAPK1,AKR1C3	11/154
19_Member	GO Biological Processes	GO:0141193	nuclear receptor-mediated signaling pathway	-11.2121	-8.75746	2099,2908,3717,4306,5241,5292,5468,5594,7421	ESR1,NR3C1,JAK2,NR3C2,PGR,PIM1,PPARG,MAPK1,VDR	9/87
19_Member	GO Molecular Functions	GO:0004879	nuclear receptor activity	-10.9897	-8.56609	2099,2908,3164,4306,5241,5467,5468,7421	ESR1,NR3C1,NR4A1,NR3C2,PGR,PPARD,PPARG,VDR	8/59
19_Member	GO Molecular Functions	GO:0098531	ligand-activated transcription factor activity	-10.9287	-8.52106	2099,2908,3164,4306,5241,5467,5468,7421	ESR1,NR3C1,NR4A1,NR3C2,PGR,PPARD,PPARG,VDR	8/60
19_Member	GO Biological Processes	GO:0030522	intracellular receptor signaling pathway	-10.9233	-8.52106	2099,2908,3164,3717,4306,5241,5292,5467,5468,5594,7421	ESR1,NR3C1,NR4A1,JAK2,NR3C2,PGR,PIM1,PPARD,PPARG,MAPK1,VDR	11/186
19_Member	GO Biological Processes	GO:0048729	tissue morphogenesis	-10.7586	-8.39418	760,836,846,1956,2099,2260,2263,2908,3791,4193,5241,5663,7134,7137,7139,7421	CA2,CASP3,CASR,EGFR,ESR1,FGFR1,FGFR2,NR3C1,KDR,MDM2,PGR,PSEN1,TNNC1,TNNI3,TNNT2,VDR	16/572
19_Member	GO Biological Processes	GO:0009755	hormone-mediated signaling pathway	-10.7202	-8.36025	2099,2908,3717,4306,5241,5292,5467,5468,5594,7421	ESR1,NR3C1,JAK2,NR3C2,PGR,PIM1,PPARD,PPARG,MAPK1,VDR	10/142
19_Member	GO Biological Processes	GO:0061180	mammary gland epithelium development	-9.25103	-7.1014	2099,2263,2908,3717,5241,5594,7421	ESR1,FGFR2,NR3C1,JAK2,PGR,MAPK1,VDR	7/59
19_Member	GO Biological Processes	GO:0043401	steroid hormone receptor signaling pathway	-8.38231	-6.36657	2099,2908,3717,4306,5241,5467,5594	ESR1,NR3C1,JAK2,NR3C2,PGR,PPARD,MAPK1	7/78
19_Member	GO Biological Processes	GO:0030879	mammary gland development	-8.28116	-6.28662	1588,2099,2263,2908,3717,5241,5594,7421	CYP19A1,ESR1,FGFR2,NR3C1,JAK2,PGR,MAPK1,VDR	8/127
19_Member	GO Molecular Functions	GO:0003707	nuclear steroid receptor activity	-7.93421	-5.97842	2099,2908,4306,5241,5467	ESR1,NR3C1,NR3C2,PGR,PPARD	5/25
19_Member	GO Biological Processes	GO:0002009	morphogenesis of an epithelium	-7.82962	-5.88943	760,836,846,1956,2099,2260,2263,2908,3791,5241,5663,7421	CA2,CASP3,CASR,EGFR,ESR1,FGFR1,FGFR2,NR3C1,KDR,PGR,PSEN1,VDR	12/458
19_Member	GO Molecular Functions	GO:0034056	estrogen response element binding	-7.58989	-5.69187	2099,2908,4306,5241	ESR1,NR3C1,NR3C2,PGR	4/11
19_Member	GO Biological Processes	GO:0022612	gland morphogenesis	-7.4758	-5.59297	1956,2099,2260,2263,2908,5241,7421	EGFR,ESR1,FGFR1,FGFR2,NR3C1,PGR,VDR	7/105
19_Member	GO Biological Processes	GO:0030518	nuclear receptor-mediated steroid hormone signaling pathway	-7.4516	-5.57175	2099,2908,3717,4306,5241,5594	ESR1,NR3C1,JAK2,NR3C2,PGR,MAPK1	6/62
19_Member	GO Biological Processes	GO:0060603	mammary gland duct morphogenesis	-7.43556	-5.56013	2099,2263,2908,5241,7421	ESR1,FGFR2,NR3C1,PGR,VDR	5/31
19_Member	GO Molecular Functions	GO:0005496	steroid binding	-7.41888	-5.54491	2052,2099,2908,3290,4306,5241,7421	EPHX1,ESR1,NR3C1,HSD11B1,NR3C2,PGR,VDR	7/107
19_Member	GO Biological Processes	GO:0060443	mammary gland morphogenesis	-6.59333	-4.83207	2099,2263,2908,5241,7421	ESR1,FGFR2,NR3C1,PGR,VDR	5/45
19_Member	GO Biological Processes	GO:0060562	epithelial tube morphogenesis	-6.30307	-4.58166	836,846,2099,2263,2908,3791,5241,5663,7421	CASP3,CASR,ESR1,FGFR2,NR3C1,KDR,PGR,PSEN1,VDR	9/314
19_Member	GO Biological Processes	GO:0061138	morphogenesis of a branching epithelium	-6.09775	-4.39151	846,2099,2260,2263,3791,5241,7421	CASR,ESR1,FGFR1,FGFR2,KDR,PGR,VDR	7/167
19_Member	GO Biological Processes	GO:0060745	mammary gland branching involved in pregnancy	-6.02856	-4.33408	2099,5241,7421	ESR1,PGR,VDR	3/7
19_Member	GO Biological Processes	GO:0001763	morphogenesis of a branching structure	-5.91207	-4.2328	846,2099,2260,2263,3791,5241,7421	CASR,ESR1,FGFR1,FGFR2,KDR,PGR,VDR	7/178
19_Member	GO Biological Processes	GO:0048754	branching morphogenesis of an epithelial tube	-5.38634	-3.77281	846,2099,2263,3791,5241,7421	CASR,ESR1,FGFR2,KDR,PGR,VDR	6/138
19_Member	GO Biological Processes	GO:0060444	branching involved in mammary gland duct morphogenesis	-4.39944	-2.91723	2099,5241,7421	ESR1,PGR,VDR	3/22
19_Member	GO Molecular Functions	GO:0017025	TBP-class protein binding	-4.2281	-2.76955	2099,2908,4306	ESR1,NR3C1,NR3C2	3/25
19_Member	GO Molecular Functions	GO:0140296	general transcription initiation factor binding	-3.2468	-1.91037	2099,2908,4306	ESR1,NR3C1,NR3C2	3/53
19_Member	GO Molecular Functions	GO:0001228	DNA-binding transcription activator activity, RNA polymerase II-specific	-2.48461	-1.22638	2099,2908,3164,4780,5241,5468	ESR1,NR3C1,NR4A1,NFE2L2,PGR,PPARG	6/475
19_Member	GO Molecular Functions	GO:0001216	DNA-binding transcription activator activity	-2.45798	-1.20187	2099,2908,3164,4780,5241,5468	ESR1,NR3C1,NR4A1,NFE2L2,PGR,PPARG	6/481
20_Summary	KEGG Pathway	hsa04148	Efferocytosis	-11.7573	-9.22352	240,834,836,840,1432,3717,5467,5468,5594,5743,5747,841,1268,2263,3164,5599,5724,1588,2099,23476,120892,5836,3767,4780,1025,2322,2932,3716,3718,5292,7297	ALOX5,CASP1,CASP3,CASP7,MAPK14,JAK2,PPARD,PPARG,MAPK1,PTGS2,PTK2,CASP8,CNR1,FGFR2,NR4A1,MAPK8,PTAFR,CYP19A1,ESR1,BRD4,LRRK2,PYGL,KCNJ11,NFE2L2,CDK9,FLT3,GSK3B,JAK1,JAK3,PIM1,TYK2	31/-
20_Member	KEGG Pathway	hsa04148	Efferocytosis	-11.7573	-9.22352	240,834,836,840,1432,3717,5467,5468,5594,5743,5747	ALOX5,CASP1,CASP3,CASP7,MAPK14,JAK2,PPARD,PPARG,MAPK1,PTGS2,PTK2	11/156
20_Member	GO Biological Processes	GO:0032496	response to lipopolysaccharide	-10.5645	-8.23061	834,836,840,841,1268,1432,2263,3164,3717,5594,5599,5724,5743	CASP1,CASP3,CASP7,CASP8,CNR1,MAPK14,FGFR2,NR4A1,JAK2,MAPK1,MAPK8,PTAFR,PTGS2	13/333
20_Member	GO Biological Processes	GO:0002237	response to molecule of bacterial origin	-10.2353	-7.968	834,836,840,841,1268,1432,2263,3164,3717,5594,5599,5724,5743	CASP1,CASP3,CASP7,CASP8,CNR1,MAPK14,FGFR2,NR4A1,JAK2,MAPK1,MAPK8,PTAFR,PTGS2	13/354
20_Member	GO Biological Processes	GO:0050727	regulation of inflammatory response	-9.16377	-7.02923	240,834,836,1268,1432,1588,2099,3717,5467,5468,5743,23476,120892	ALOX5,CASP1,CASP3,CNR1,MAPK14,CYP19A1,ESR1,JAK2,PPARD,PPARG,PTGS2,BRD4,LRRK2	13/433
20_Member	GO Biological Processes	GO:0009617	response to bacterium	-7.49315	-5.60732	834,836,840,841,1268,1432,2263,3164,3717,5594,5599,5724,5743,5836	CASP1,CASP3,CASP7,CASP8,CNR1,MAPK14,FGFR2,NR4A1,JAK2,MAPK1,MAPK8,PTAFR,PTGS2,PYGL	14/713
20_Member	GO Biological Processes	GO:0034612	response to tumor necrosis factor	-7.05993	-5.24469	836,841,1432,3717,3767,4780,5594,5743	CASP3,CASP8,MAPK14,JAK2,KCNJ11,NFE2L2,MAPK1,PTGS2	8/182
20_Member	GO Biological Processes	GO:0071345	cellular response to cytokine stimulus	-6.45116	-4.71189	834,1025,1432,2322,2932,3716,3717,3718,3767,4780,5292,5594,7297	CASP1,CDK9,MAPK14,FLT3,GSK3B,JAK1,JAK2,JAK3,KCNJ11,NFE2L2,PIM1,MAPK1,TYK2	13/737
20_Member	GO Biological Processes	GO:0071216	cellular response to biotic stimulus	-6.05046	-4.35404	834,840,1432,2932,3717,5594,5599,5724	CASP1,CASP7,MAPK14,GSK3B,JAK2,MAPK1,MAPK8,PTAFR	8/247
20_Member	GO Biological Processes	GO:0071222	cellular response to lipopolysaccharide	-5.46293	-3.84211	834,840,1432,3717,5594,5599,5724	CASP1,CASP7,MAPK14,JAK2,MAPK1,MAPK8,PTAFR	7/208
20_Member	GO Biological Processes	GO:0071219	cellular response to molecule of bacterial origin	-5.28982	-3.69051	834,840,1432,3717,5594,5599,5724	CASP1,CASP7,MAPK14,JAK2,MAPK1,MAPK8,PTAFR	7/221
20_Member	GO Biological Processes	GO:0071356	cellular response to tumor necrosis factor	-3.93688	-2.51392	1432,3717,3767,4780,5594	MAPK14,JAK2,KCNJ11,NFE2L2,MAPK1	5/156

## Sheet: Annotation-HA and Liver injury
MyList	Gene ID	Type	Tax ID	Homologene Gene ID	Homologene Gene Tax ID	GO:0071417 cellular response to organonit	GO:0071407 cellular response to organic c	hsa05200 Pathways in cancer	GO:0048545 response to steroid hormone	hsa05417 Lipid and atherosclerosis	GO:0010038 response to metal ion	hsa05161 Hepatitis B	GO:0071214 cellular response to abiotic s	GO:0042391 regulation of membrane potenti	hsa04914 Progesterone-mediated oocyte m	GO:0003013 circulatory system process	GO:1903829 positive regulation of protein	GO:0007507 heart development	GO:0019900 kinase binding	GO:0010817 regulation of hormone levels	GO:0043068 positive regulation of program	hsa05215 Prostate cancer	GO:0001890 placenta development	GO:0071383 cellular response to steroid h	hsa04148 Efferocytosis
PPARG	5468	symbol	H. sapiens	5468	H. sapiens	1	0	1	0	1	1	0	0	0	0	1	1	0	0	1	1	0	1	1	1
PPARD	5467	symbol	H. sapiens	5467	H. sapiens	1	1	1	1	1	1	0	0	0	0	0	0	0	0	0	0	0	1	1	1
NR3C1	2908	symbol	H. sapiens	2908	H. sapiens	1	1	1	1	0	0	0	0	1	1	0	0	0	1	1	1	1	0	1	0
ESR1	2099	symbol	H. sapiens	2099	H. sapiens	1	1	1	1	1	0	0	1	0	1	0	0	0	1	1	0	1	0	1	1
NFE2L2	4780	symbol	H. sapiens	4780	H. sapiens	1	0	1	0	1	1	0	0	0	1	0	0	0	0	0	1	1	0	1	1
KCNA5	3741	symbol	H. sapiens	3741	H. sapiens	0	0	0	0	0	1	0	1	1	0	1	1	0	1	1	0	0	0	0	0
KCNE1	3753	symbol	H. sapiens	3753	H. sapiens	1	1	0	0	0	0	0	1	1	0	1	1	0	0	0	0	0	0	0	0
ALOX5	240	symbol	H. sapiens	240	H. sapiens	0	0	0	0	1	0	0	0	0	0	0	1	0	0	1	1	0	1	0	1
TNNC1	7134	symbol	H. sapiens	7134	H. sapiens	0	0	0	0	0	1	0	0	0	0	1	1	1	0	0	0	0	0	1	0
ABCC9	10060	symbol	H. sapiens	10060	H. sapiens	0	0	0	0	0	0	0	0	1	0	1	0	1	0	1	0	0	0	0	0
NR3C2	4306	symbol	H. sapiens	4306	H. sapiens	1	1	1	1	0	0	0	0	0	0	0	0	0	0	0	0	0	0	1	0
PGR	5241	symbol	H. sapiens	5241	H. sapiens	1	1	0	1	0	0	0	0	0	1	0	0	0	0	0	0	1	1	1	0
JAK1	3716	symbol	H. sapiens	3716	H. sapiens	1	0	1	0	1	0	1	0	0	0	0	1	0	0	0	0	0	0	0	1
JAK2	3717	symbol	H. sapiens	3717	H. sapiens	1	1	1	1	1	1	1	0	1	1	0	1	0	1	1	1	1	1	1	1
PARP1	142	symbol	H. sapiens	142	H. sapiens	1	0	1	1	1	1	0	1	1	1	1	1	0	1	0	1	0	1	0	0
PTAFR	5724	symbol	H. sapiens	5724	H. sapiens	1	1	1	1	0	0	0	1	1	0	1	0	0	1	1	1	1	0	0	1
MAP3K14	9020	symbol	H. sapiens	9020	H. sapiens	0	0	1	0	1	1	1	1	0	1	0	0	0	0	0	0	0	0	0	0
MAPK1	5594	symbol	H. sapiens	5594	H. sapiens	1	1	1	1	1	1	1	1	1	1	0	1	1	0	0	0	1	1	1	1
TYMS	7298	symbol	H. sapiens	7298	H. sapiens	1	0	0	1	0	1	0	0	0	1	0	0	0	0	0	0	1	1	0	0
CYP19A1	1588	symbol	H. sapiens	1588	H. sapiens	0	0	0	0	0	0	0	1	0	0	1	0	0	0	1	0	1	0	1	1
LRRK2	120892	symbol	H. sapiens	120892	H. sapiens	1	1	1	0	1	1	0	0	1	1	1	1	1	0	1	1	0	0	0	1
VDR	7421	symbol	H. sapiens	7421	H. sapiens	1	1	1	0	1	1	0	0	1	0	0	0	0	0	0	1	1	1	1	0
EGFR	1956	symbol	H. sapiens	1956	H. sapiens	1	1	1	1	1	1	1	1	1	1	1	1	1	1	1	1	1	1	1	0
PSEN2	5664	symbol	H. sapiens	5664	H. sapiens	0	0	0	0	1	0	0	0	1	1	0	0	0	0	0	1	0	0	0	0
PPOX	5498	symbol	H. sapiens	5498	H. sapiens	0	0	0	0	0	0	0	0	0	0	0	0	0	0	0	0	0	0	0	0
MAPK8	5599	symbol	H. sapiens	5599	H. sapiens	0	1	1	0	1	1	1	1	1	1	0	0	0	1	0	1	1	0	0	1
AKR1B1	231	symbol	H. sapiens	231	H. sapiens	0	0	0	0	0	1	0	1	0	0	0	0	0	0	1	0	0	0	0	0
PIM1	5292	symbol	H. sapiens	5292	H. sapiens	1	1	1	0	1	1	0	1	0	1	0	0	0	0	0	0	0	0	1	1
MCL1	4170	symbol	H. sapiens	4170	H. sapiens	0	0	1	0	1	0	0	1	1	0	0	0	0	0	0	1	0	0	0	0
PYGL	5836	symbol	H. sapiens	5836	H. sapiens	0	0	0	0	1	0	0	0	0	0	0	0	0	0	0	0	0	1	0	1
PTK2	5747	symbol	H. sapiens	5747	H. sapiens	1	0	1	0	1	0	1	1	1	1	0	0	1	1	1	0	1	1	0	1
KDR	3791	symbol	H. sapiens	3791	H. sapiens	0	0	1	1	1	0	0	0	1	1	0	0	1	0	1	1	0	1	1	0
MAPK14	1432	symbol	H. sapiens	1432	H. sapiens	1	1	1	0	1	1	1	1	1	1	0	1	1	1	0	1	1	1	0	1
PTGS2	5743	symbol	H. sapiens	5743	H. sapiens	1	1	1	1	1	1	1	1	1	1	1	1	0	0	1	1	0	1	0	1
MAPK10	5602	symbol	H. sapiens	5602	H. sapiens	0	0	1	0	1	1	1	0	1	1	0	0	0	0	0	0	1	0	0	0
CA2	760	symbol	H. sapiens	760	H. sapiens	1	0	0	0	0	0	0	0	0	0	0	0	0	0	0	0	0	0	1	0
CA1	759	symbol	H. sapiens	759	H. sapiens	0	0	0	0	0	0	0	0	0	0	0	0	0	0	0	0	0	0	0	0
CA4	762	symbol	H. sapiens	762	H. sapiens	0	0	0	0	0	0	0	0	1	0	0	0	0	0	0	0	0	0	0	0
GSK3B	2932	symbol	H. sapiens	2932	H. sapiens	1	1	1	0	1	0	1	0	1	1	0	1	0	1	1	0	1	0	0	1
CDK1	983	symbol	H. sapiens	983	H. sapiens	0	1	1	0	1	1	1	0	0	1	0	1	1	0	0	1	0	0	0	0
EPHX1	2052	symbol	H. sapiens	2052	H. sapiens	0	0	0	0	1	0	0	0	0	0	0	0	0	0	0	0	1	0	1	0
CNR1	1268	symbol	H. sapiens	1268	H. sapiens	0	0	1	0	0	1	0	0	1	0	1	1	0	0	1	1	1	0	0	1
HSD11B1	3290	symbol	H. sapiens	3290	H. sapiens	0	0	0	0	0	0	0	0	0	0	0	0	0	0	0	0	0	0	1	0
MDM2	4193	symbol	H. sapiens	4193	H. sapiens	1	1	1	1	1	1	1	1	0	1	1	1	1	0	0	1	1	0	1	0
PTGS1	5742	symbol	H. sapiens	5742	H. sapiens	0	0	0	0	0	1	0	0	0	0	1	0	0	0	0	0	1	0	0	0
TERT	7015	symbol	H. sapiens	7015	H. sapiens	0	0	1	0	0	1	1	0	0	1	0	1	0	0	0	1	1	0	0	0
CDK9	1025	symbol	H. sapiens	1025	H. sapiens	0	0	1	0	0	0	0	0	0	1	0	1	0	1	0	0	0	0	0	1
JAK3	3718	symbol	H. sapiens	3718	H. sapiens	1	0	1	0	1	0	1	0	0	0	0	0	0	0	0	0	1	0	0	1
CES1	1066	symbol	H. sapiens	1066	H. sapiens	0	1	0	0	0	0	0	0	0	0	0	0	0	0	1	0	0	0	0	0
CES2	8824	symbol	H. sapiens	8824	H. sapiens	0	0	0	0	0	0	0	0	0	0	0	0	0	0	0	0	0	0	0	0
TYK2	7297	symbol	H. sapiens	7297	H. sapiens	1	0	1	0	1	0	1	0	0	0	0	1	0	0	0	0	1	0	0	1
FGFR2	2263	symbol	H. sapiens	2263	H. sapiens	0	1	1	1	0	0	0	0	0	1	0	0	1	0	1	0	1	1	1	1
CASP1	834	symbol	H. sapiens	834	H. sapiens	0	1	0	0	1	1	0	1	0	0	0	0	0	1	0	1	1	0	0	1
CASR	846	symbol	H. sapiens	846	H. sapiens	0	1	1	0	1	1	0	0	1	0	1	1	0	1	1	0	0	0	1	0
MMP1	4312	symbol	H. sapiens	4312	H. sapiens	0	0	1	0	1	1	0	1	0	0	0	0	0	0	0	1	0	0	0	0
FLT3	2322	symbol	H. sapiens	2322	H. sapiens	1	1	1	1	0	0	0	0	0	0	0	0	0	0	0	0	1	0	1	1
CDK2	1017	symbol	H. sapiens	1017	H. sapiens	1	0	1	0	1	0	1	1	0	1	0	0	0	0	0	0	1	0	0	0
GRM5	2915	symbol	H. sapiens	2915	H. sapiens	1	0	1	0	1	1	0	0	1	0	0	0	0	1	0	0	0	0	0	0
GABRB3	2562	symbol	H. sapiens	2562	H. sapiens	1	1	1	0	0	0	0	0	1	0	0	0	0	0	0	0	0	0	0	0
GABRA2	2555	symbol	H. sapiens	2555	H. sapiens	0	0	1	0	0	0	0	0	1	0	0	0	0	0	0	0	0	0	0	0
KCNJ11	3767	symbol	H. sapiens	3767	H. sapiens	0	0	0	1	1	0	0	1	1	0	0	1	1	0	1	0	1	0	0	1
ABCB1	5243	symbol	H. sapiens	5243	H. sapiens	0	0	0	0	0	0	0	1	0	1	1	0	0	0	1	0	1	0	0	0
NQO2	4835	symbol	H. sapiens	4835	H. sapiens	0	0	0	0	0	0	0	0	0	0	0	0	0	0	0	0	0	0	0	0
AKR1C3	8644	symbol	H. sapiens	8644	H. sapiens	1	1	1	1	1	1	0	0	0	0	1	0	0	0	1	1	0	1	1	0
AURKA	6790	symbol	H. sapiens	6790	H. sapiens	0	0	1	0	1	0	0	0	1	1	0	0	0	1	1	0	1	0	0	0
IGF1R	3480	symbol	H. sapiens	3480	H. sapiens	1	1	1	1	1	1	0	1	1	1	0	0	1	0	1	1	1	0	1	0
INSR	3643	symbol	H. sapiens	3643	H. sapiens	1	0	1	1	1	0	0	0	1	1	1	0	1	0	1	0	1	0	0	0
FGFR1	2260	symbol	H. sapiens	2260	H. sapiens	0	0	1	0	0	1	0	0	0	1	1	0	1	0	1	0	1	1	1	0
CYP11B1	1584	symbol	H. sapiens	1584	H. sapiens	1	0	0	0	0	1	0	0	0	0	1	0	0	0	1	0	1	0	0	0
CYP11B2	1585	symbol	H. sapiens	1585	H. sapiens	1	0	0	0	0	1	0	0	0	0	1	0	0	0	1	0	0	0	0	0
PIK3CA	5290	symbol	H. sapiens	5290	H. sapiens	1	0	1	1	1	1	1	1	1	1	1	1	0	0	1	1	1	0	0	0
DHODH	1723	symbol	H. sapiens	1723	H. sapiens	0	0	0	0	0	0	0	0	0	0	0	0	0	0	0	0	0	0	0	0
CHEK1	1111	symbol	H. sapiens	1111	H. sapiens	1	1	1	0	1	0	1	1	0	1	0	0	0	0	0	1	0	0	0	0
BRD4	23476	symbol	H. sapiens	23476	H. sapiens	0	0	1	0	0	0	0	0	0	1	0	0	0	0	0	0	1	0	0	1
CASP3	836	symbol	H. sapiens	836	H. sapiens	1	1	1	1	1	1	1	1	0	1	0	0	1	0	0	1	1	1	1	1
CASP6	839	symbol	H. sapiens	839	H. sapiens	1	1	0	0	1	0	0	0	0	0	0	0	0	0	0	1	1	0	0	0
CASP7	840	symbol	H. sapiens	840	H. sapiens	1	1	1	0	1	0	0	0	0	0	0	0	1	0	0	1	0	0	0	1
ALOX12	239	symbol	H. sapiens	239	H. sapiens	0	0	0	0	1	0	0	0	0	0	0	0	0	0	0	0	0	0	0	0
CASP8	841	symbol	H. sapiens	841	H. sapiens	0	1	1	0	1	1	1	1	1	1	0	0	1	0	0	1	1	1	0	1
NR4A1	3164	symbol	H. sapiens	3164	H. sapiens	1	0	1	0	0	0	0	0	1	1	1	0	1	0	0	1	1	1	1	1
CDK5	1020	symbol	H. sapiens	1020	H. sapiens	1	0	1	0	1	0	0	0	1	1	0	1	1	0	1	1	1	0	0	0
GABRA3	2556	symbol	H. sapiens	2556	H. sapiens	0	0	1	0	0	0	0	0	1	0	0	0	0	0	0	0	0	0	0	0
GABRG2	2566	symbol	H. sapiens	2566	H. sapiens	1	1	1	0	0	0	0	0	1	0	0	0	0	0	0	0	0	0	0	0
KCNQ1	3784	symbol	H. sapiens	3784	H. sapiens	1	1	0	0	0	0	0	1	1	0	1	0	1	1	1	0	1	0	0	0
TNNT2	7139	symbol	H. sapiens	7139	H. sapiens	0	0	0	0	0	1	0	0	0	0	1	0	1	0	1	1	0	0	1	0
CCNB1	891	symbol	H. sapiens	891	H. sapiens	0	0	1	0	1	0	0	0	0	1	0	0	0	1	0	0	0	0	0	0
CCNA2	890	symbol	H. sapiens	890	H. sapiens	1	1	1	0	0	0	1	1	0	1	0	0	0	1	0	1	0	0	0	0
CCNE1	898	symbol	H. sapiens	898	H. sapiens	0	0	1	0	0	0	1	1	0	1	0	0	0	1	0	0	1	0	0	0
GABRA1	2554	symbol	H. sapiens	2554	H. sapiens	0	0	1	0	0	0	0	0	1	0	0	0	0	0	0	0	0	0	0	0
GABRA5	2558	symbol	H. sapiens	2558	H. sapiens	0	0	1	0	0	0	0	0	1	0	0	0	0	0	0	0	0	0	0	0
TNNI3	7137	symbol	H. sapiens	7137	H. sapiens	0	0	0	0	1	0	0	0	0	0	1	0	1	1	0	0	0	0	1	0
PSEN1	5663	symbol	H. sapiens	5663	H. sapiens	1	0	1	0	1	1	1	0	1	1	0	1	1	0	0	1	1	0	1	0

## Sheet: Enrichment-PP and Brain injury
GroupID	Category	Term	Description	LogP	Log(q-value)	Genes	Symbols	InTerm_InList
1_Summary	GO Molecular Functions	GO:0004879	nuclear receptor activity	-13.0785	-8.97915	196,5467,5468,6256,7068,7421,9971,4780,150,2740,2778,3320,4313,7157,4322,240,6532,23435	AHR,PPARD,PPARG,RXRA,THRB,VDR,NR1H4,NFE2L2,ADRA2A,GLP1R,GNAS,HSP90AA1,MMP2,TP53,MMP13,ALOX5,SLC6A4,TARDBP	18/-
1_Member	GO Molecular Functions	GO:0004879	nuclear receptor activity	-13.0785	-8.97915	196,5467,5468,6256,7068,7421,9971	AHR,PPARD,PPARG,RXRA,THRB,VDR,NR1H4	7/59
1_Member	GO Molecular Functions	GO:0098531	ligand-activated transcription factor activity	-13.0248	-8.97915	196,5467,5468,6256,7068,7421,9971	AHR,PPARD,PPARG,RXRA,THRB,VDR,NR1H4	7/60
1_Member	GO Molecular Functions	GO:0001221	transcription coregulator binding	-11.0116	-7.14196	196,4780,5467,5468,6256,7068,9971	AHR,NFE2L2,PPARD,PPARG,RXRA,THRB,NR1H4	7/114
1_Member	GO Biological Processes	GO:0009725	response to hormone	-10.272	-6.52734	150,2740,2778,3320,4313,4780,5467,5468,6256,7068,7421	ADRA2A,GLP1R,GNAS,HSP90AA1,MMP2,NFE2L2,PPARD,PPARG,RXRA,THRB,VDR	11/795
1_Member	GO Biological Processes	GO:0030522	intracellular receptor signaling pathway	-9.51036	-6.00873	196,5467,5468,6256,7068,7421,9971	AHR,PPARD,PPARG,RXRA,THRB,VDR,NR1H4	7/186
1_Member	GO Biological Processes	GO:0032870	cellular response to hormone stimulus	-9.25433	-5.98678	150,2740,2778,4780,5467,5468,6256,7068,7421	ADRA2A,GLP1R,GNAS,NFE2L2,PPARD,PPARG,RXRA,THRB,VDR	9/514
1_Member	GO Biological Processes	GO:0009299	mRNA transcription	-9.02435	-5.82375	5468,6256,7068,7157,7421	PPARG,RXRA,THRB,TP53,VDR	5/50
1_Member	GO Molecular Functions	GO:0008134	transcription factor binding	-8.66657	-5.52397	196,4780,5467,5468,6256,7068,7157,7421,9971	AHR,NFE2L2,PPARD,PPARG,RXRA,THRB,TP53,VDR,NR1H4	9/600
1_Member	GO Molecular Functions	GO:0140297	DNA-binding transcription factor binding	-8.07334	-5.02765	196,4780,5467,5468,6256,7157,7421,9971	AHR,NFE2L2,PPARD,PPARG,RXRA,TP53,VDR,NR1H4	8/478
1_Member	GO Molecular Functions	GO:0033293	monocarboxylic acid binding	-8.00549	-4.98098	5467,5468,6256,7421,9971	PPARD,PPARG,RXRA,VDR,NR1H4	5/79
1_Member	GO Biological Processes	GO:0141193	nuclear receptor-mediated signaling pathway	-7.79298	-4.8165	5468,6256,7068,7421,9971	PPARG,RXRA,THRB,VDR,NR1H4	5/87
1_Member	GO Cellular Components	GO:0005667	transcription regulator complex	-7.78301	-4.8165	196,4780,5468,6256,7068,7157,7421,9971	AHR,NFE2L2,PPARG,RXRA,THRB,TP53,VDR,NR1H4	8/521
1_Member	GO Molecular Functions	GO:0061629	RNA polymerase II-specific DNA-binding transcription factor binding	-7.66856	-4.75685	196,4780,5468,6256,7157,7421,9971	AHR,NFE2L2,PPARG,RXRA,TP53,VDR,NR1H4	7/343
1_Member	GO Biological Processes	GO:0042789	mRNA transcription by RNA polymerase II	-7.03524	-4.24482	5468,6256,7068,7421	PPARG,RXRA,THRB,VDR	4/46
1_Member	GO Cellular Components	GO:0090575	RNA polymerase II transcription regulator complex	-6.94944	-4.189	4780,5468,6256,7068,7421,9971	NFE2L2,PPARG,RXRA,THRB,VDR,NR1H4	6/257
1_Member	GO Biological Processes	GO:0009755	hormone-mediated signaling pathway	-6.72436	-4.00088	5467,5468,6256,7068,7421	PPARD,PPARG,RXRA,THRB,VDR	5/142
1_Member	GO Molecular Functions	GO:0046965	nuclear retinoid X receptor binding	-6.32363	-3.70118	5468,7421,9971	PPARG,VDR,NR1H4	3/17
1_Member	GO Biological Processes	GO:0048384	retinoic acid receptor signaling pathway	-6.32363	-3.70118	5468,6256,7068	PPARG,RXRA,THRB	3/17
1_Member	GO Molecular Functions	GO:0031406	carboxylic acid binding	-6.15452	-3.55598	5467,5468,6256,7421,9971	PPARD,PPARG,RXRA,VDR,NR1H4	5/185
1_Member	GO Molecular Functions	GO:0043177	organic acid binding	-6.0199	-3.4366	5467,5468,6256,7421,9971	PPARD,PPARG,RXRA,VDR,NR1H4	5/197
1_Member	GO Molecular Functions	GO:0042974	nuclear retinoic acid receptor binding	-5.79656	-3.24223	5468,7421,9971	PPARG,VDR,NR1H4	3/25
1_Member	GO Biological Processes	GO:0006366	transcription by RNA polymerase II	-5.77043	-3.22304	5468,6256,7068,7157,7421,9971	PPARG,RXRA,THRB,TP53,VDR,NR1H4	6/409
1_Member	GO Biological Processes	GO:0032107	regulation of response to nutrient levels	-5.5511	-3.03689	6256,7421,9971	RXRA,VDR,NR1H4	3/30
1_Member	KEGG Pathway	hsa04928	Parathyroid hormone synthesis, secretion and action	-5.42721	-2.93417	2778,4322,6256,7421	GNAS,MMP13,RXRA,VDR	4/115
1_Member	GO Molecular Functions	GO:0016922	nuclear receptor binding	-5.13805	-2.68895	5468,6256,7421,9971	PPARG,RXRA,VDR,NR1H4	4/136
1_Member	GO Cellular Components	GO:0043235	receptor complex	-5.06446	-2.64202	150,196,5468,6256,7421,9971	ADRA2A,AHR,PPARG,RXRA,VDR,NR1H4	6/543
1_Member	GO Biological Processes	GO:0006351	DNA-templated transcription	-5.05085	-2.63913	5468,6256,7068,7157,7421,9971	PPARG,RXRA,THRB,TP53,VDR,NR1H4	6/546
1_Member	GO Biological Processes	GO:0030501	positive regulation of bone mineralization	-5.04137	-2.63913	240,6256,7421	ALOX5,RXRA,VDR	3/44
1_Member	GO Biological Processes	GO:0007584	response to nutrient	-4.85941	-2.50832	5468,6532,7421,9971	PPARG,SLC6A4,VDR,NR1H4	4/160
1_Member	GO Biological Processes	GO:0045778	positive regulation of ossification	-4.77155	-2.44186	240,6256,7421	ALOX5,RXRA,VDR	3/54
1_Member	GO Biological Processes	GO:0070169	positive regulation of biomineral tissue development	-4.77155	-2.44186	240,6256,7421	ALOX5,RXRA,VDR	3/54
1_Member	GO Biological Processes	GO:0016071	mRNA metabolic process	-4.6646	-2.3671	5468,6256,7068,7157,7421,23435	PPARG,RXRA,THRB,TP53,VDR,TARDBP	6/639
1_Member	GO Biological Processes	GO:0030500	regulation of bone mineralization	-4.22634	-2.00347	240,6256,7421	ALOX5,RXRA,VDR	3/82
1_Member	GO Biological Processes	GO:0070167	regulation of biomineral tissue development	-3.9316	-1.77198	240,6256,7421	ALOX5,RXRA,VDR	3/103
1_Member	GO Biological Processes	GO:0030278	regulation of ossification	-3.69331	-1.57958	240,6256,7421	ALOX5,RXRA,VDR	3/124
2_Summary	GO Biological Processes	GO:0009410	response to xenobiotic stimulus	-9.91917	-6.27142	196,1576,1814,3320,4313,4780,6531,6532,7157,4353,5467	AHR,CYP3A4,DRD3,HSP90AA1,MMP2,NFE2L2,SLC6A3,SLC6A4,TP53,MPO,PPARD	11/-
2_Member	GO Biological Processes	GO:0009410	response to xenobiotic stimulus	-9.91917	-6.27142	196,1576,1814,3320,4313,4780,6531,6532,7157	AHR,CYP3A4,DRD3,HSP90AA1,MMP2,NFE2L2,SLC6A3,SLC6A4,TP53	9/432
2_Member	GO Biological Processes	GO:0071466	cellular response to xenobiotic stimulus	-4.53991	-2.26507	196,1576,4780,7157	AHR,CYP3A4,NFE2L2,TP53	4/193
2_Member	GO Biological Processes	GO:0044248	cellular catabolic process	-4.15111	-1.93807	1576,3320,4353,4780,5467,7157	CYP3A4,HSP90AA1,MPO,NFE2L2,PPARD,TP53	6/790
3_Summary	GO Biological Processes	GO:0071407	cellular response to organic cyclic compound	-9.62059	-6.05202	196,1814,2778,4313,5467,6256,6532,7421,9971	AHR,DRD3,GNAS,MMP2,PPARD,RXRA,SLC6A4,VDR,NR1H4	9/-
3_Member	GO Biological Processes	GO:0071407	cellular response to organic cyclic compound	-9.62059	-6.05202	196,1814,2778,4313,5467,6256,6532,7421,9971	AHR,DRD3,GNAS,MMP2,PPARD,RXRA,SLC6A4,VDR,NR1H4	9/467
3_Member	GO Biological Processes	GO:0071396	cellular response to lipid	-7.6876	-4.75685	196,2778,4313,5467,6256,6532,7421,9971	AHR,GNAS,MMP2,PPARD,RXRA,SLC6A4,VDR,NR1H4	8/536
3_Member	GO Biological Processes	GO:0032526	response to retinoic acid	-3.89464	-1.74381	4313,6256,6532	MMP2,RXRA,SLC6A4	3/106
4_Summary	GO Biological Processes	GO:0031667	response to nutrient levels	-9.43679	-5.99315	3309,4353,4780,5467,5468,6532,7157,7421,9971,2778,3320,4313,6256,196,240,1814,6531,150	HSPA5,MPO,NFE2L2,PPARD,PPARG,SLC6A4,TP53,VDR,NR1H4,GNAS,HSP90AA1,MMP2,RXRA,AHR,ALOX5,DRD3,SLC6A3,ADRA2A	18/-
4_Member	GO Biological Processes	GO:0031667	response to nutrient levels	-9.43679	-5.99315	3309,4353,4780,5467,5468,6532,7157,7421,9971	HSPA5,MPO,NFE2L2,PPARD,PPARG,SLC6A4,TP53,VDR,NR1H4	9/490
4_Member	KEGG Pathway	hsa05200	Pathways in cancer	-7.70646	-4.75767	2778,3320,4313,4780,5467,5468,6256,7157	GNAS,HSP90AA1,MMP2,NFE2L2,PPARD,PPARG,RXRA,TP53	8/533
4_Member	GO Biological Processes	GO:0031669	cellular response to nutrient levels	-7.17907	-4.35086	3309,4780,5467,7157,7421,9971	HSPA5,NFE2L2,PPARD,TP53,VDR,NR1H4	6/235
4_Member	GO Biological Processes	GO:0032102	negative regulation of response to external stimulus	-6.99897	-4.22045	196,240,1814,5467,5468,6531,9971	AHR,ALOX5,DRD3,PPARD,PPARG,SLC6A3,NR1H4	7/430
4_Member	GO Biological Processes	GO:0001666	response to hypoxia	-6.53737	-3.86275	4313,4780,5467,5468,6532,7157	MMP2,NFE2L2,PPARD,PPARG,SLC6A4,TP53	6/302
4_Member	GO Biological Processes	GO:0036293	response to decreased oxygen levels	-6.42212	-3.77437	4313,4780,5467,5468,6532,7157	MMP2,NFE2L2,PPARD,PPARG,SLC6A4,TP53	6/316
4_Member	GO Biological Processes	GO:0070482	response to oxygen levels	-6.22156	-3.60723	4313,4780,5467,5468,6532,7157	MMP2,NFE2L2,PPARD,PPARG,SLC6A4,TP53	6/342
4_Member	GO Biological Processes	GO:0050728	negative regulation of inflammatory response	-5.96629	-3.39042	196,240,5467,5468,9971	AHR,ALOX5,PPARD,PPARG,NR1H4	5/202
4_Member	GO Biological Processes	GO:0031348	negative regulation of defense response	-5.16981	-2.71518	196,240,5467,5468,9971	AHR,ALOX5,PPARD,PPARG,NR1H4	5/294
4_Member	GO Biological Processes	GO:0071456	cellular response to hypoxia	-5.08824	-2.65533	4780,5467,5468,7157	NFE2L2,PPARD,PPARG,TP53	4/140
4_Member	GO Biological Processes	GO:0036294	cellular response to decreased oxygen levels	-5.00451	-2.61202	4780,5467,5468,7157	NFE2L2,PPARD,PPARG,TP53	4/147
4_Member	KEGG Pathway	hsa04148	Efferocytosis	-4.90271	-2.54721	240,5467,5468,6256	ALOX5,PPARD,PPARG,RXRA	4/156
4_Member	GO Biological Processes	GO:0071453	cellular response to oxygen levels	-4.83817	-2.49145	4780,5467,5468,7157	NFE2L2,PPARD,PPARG,TP53	4/162
4_Member	GO Biological Processes	GO:0050680	negative regulation of epithelial cell proliferation	-4.72604	-2.4087	240,5467,5468,7421	ALOX5,PPARD,PPARG,VDR	4/173
4_Member	GO Biological Processes	GO:0045596	negative regulation of cell differentiation	-4.36451	-2.11626	1814,4780,5467,5468,6532,7157	DRD3,NFE2L2,PPARD,PPARG,SLC6A4,TP53	6/723
4_Member	GO Biological Processes	GO:0050727	regulation of inflammatory response	-4.36262	-2.11626	196,240,5467,5468,9971	AHR,ALOX5,PPARD,PPARG,NR1H4	5/433
4_Member	GO Biological Processes	GO:1902893	regulation of miRNA transcription	-4.34224	-2.10272	5467,5468,7157	PPARD,PPARG,TP53	3/75
4_Member	KEGG Pathway	hsa03320	PPAR signaling pathway	-4.32502	-2.08888	5467,5468,6256	PPARD,PPARG,RXRA	3/76
4_Member	GO Biological Processes	GO:0008285	negative regulation of cell population proliferation	-4.14807	-1.93807	240,5467,5468,6532,7157,7421	ALOX5,PPARD,PPARG,SLC6A4,TP53,VDR	6/791
4_Member	GO Biological Processes	GO:2000628	regulation of miRNA metabolic process	-4.10576	-1.90826	5467,5468,7157	PPARD,PPARG,TP53	3/90
4_Member	GO Biological Processes	GO:0010660	regulation of muscle cell apoptotic process	-4.07734	-1.88898	4780,5468,7157	NFE2L2,PPARG,TP53	3/92
4_Member	GO Biological Processes	GO:0015908	fatty acid transport	-4.04955	-1.86718	1814,5467,5468	DRD3,PPARD,PPARG	3/94
4_Member	GO Biological Processes	GO:0045834	positive regulation of lipid metabolic process	-3.69331	-1.57958	5467,5468,9971	PPARD,PPARG,NR1H4	3/124
4_Member	GO Biological Processes	GO:0019216	regulation of lipid metabolic process	-3.65521	-1.54904	150,5467,5468,9971	ADRA2A,PPARD,PPARG,NR1H4	4/327
4_Member	GO Biological Processes	GO:0062012	regulation of small molecule metabolic process	-3.63011	-1.53623	5467,5468,7157,9971	PPARD,PPARG,TP53,NR1H4	4/332
4_Member	GO Biological Processes	GO:0010565	regulation of cellular ketone metabolic process	-3.51124	-1.43867	5467,5468,9971	PPARD,PPARG,NR1H4	3/143
4_Member	GO Biological Processes	GO:0062013	positive regulation of small molecule metabolic process	-3.50237	-1.4344	5467,5468,9971	PPARD,PPARG,NR1H4	3/144
4_Member	GO Biological Processes	GO:0045598	regulation of fat cell differentiation	-3.47612	-1.4172	240,5467,5468	ALOX5,PPARD,PPARG	3/147
4_Member	GO Biological Processes	GO:0001890	placenta development	-3.45893	-1.40667	5467,5468,7421	PPARD,PPARG,VDR	3/149
4_Member	GO Biological Processes	GO:0015718	monocarboxylic acid transport	-3.40876	-1.36738	1814,5467,5468	DRD3,PPARD,PPARG	3/155
4_Member	GO Biological Processes	GO:0050678	regulation of epithelial cell proliferation	-3.29145	-1.26694	240,5467,5468,7421	ALOX5,PPARD,PPARG,VDR	4/408
4_Member	GO Biological Processes	GO:1905952	regulation of lipid localization	-3.19173	-1.18939	5467,5468,6256	PPARD,PPARG,RXRA	3/184
4_Member	GO Molecular Functions	GO:0001227	DNA-binding transcription repressor activity, RNA polymerase II-specific	-2.74061	-0.790088	5467,5468,7157	PPARD,PPARG,TP53	3/264
4_Member	GO Molecular Functions	GO:0001217	DNA-binding transcription repressor activity	-2.69918	-0.752129	5467,5468,7157	PPARD,PPARG,TP53	3/273
4_Member	GO Biological Processes	GO:0046942	carboxylic acid transport	-2.5913	-0.66782	1814,5467,5468	DRD3,PPARD,PPARG	3/298
4_Member	GO Biological Processes	GO:0015849	organic acid transport	-2.58719	-0.666973	1814,5467,5468	DRD3,PPARD,PPARG	3/299
4_Member	GO Biological Processes	GO:0006869	lipid transport	-2.40193	-0.506996	1814,5467,5468	DRD3,PPARD,PPARG	3/348
4_Member	GO Biological Processes	GO:0010876	lipid localization	-2.28607	-0.42507	1814,5467,5468	DRD3,PPARD,PPARG	3/383
4_Member	GO Biological Processes	GO:0015711	organic anion transport	-2.23388	-0.375706	1814,5467,5468	DRD3,PPARD,PPARG	3/400
5_Summary	GO Biological Processes	GO:0044703	multi-organism reproductive process	-9.38238	-5.9899	150,151,2778,4313,5467,6532,7421,231,4780,6531,1814,2740,5468,3320,7068,7157,9971,3309,55775	ADRA2A,ADRA2B,GNAS,MMP2,PPARD,SLC6A4,VDR,AKR1B1,NFE2L2,SLC6A3,DRD3,GLP1R,PPARG,HSP90AA1,THRB,TP53,NR1H4,HSPA5,TDP1	19/-
5_Member	GO Biological Processes	GO:0044703	multi-organism reproductive process	-9.38238	-5.9899	150,151,2778,4313,5467,6532,7421	ADRA2A,ADRA2B,GNAS,MMP2,PPARD,SLC6A4,VDR	7/194
5_Member	GO Biological Processes	GO:0044706	multi-multicellular organism process	-9.25974	-5.98678	150,151,2778,4313,5467,6532,7421	ADRA2A,ADRA2B,GNAS,MMP2,PPARD,SLC6A4,VDR	7/202
5_Member	GO Biological Processes	GO:0050878	regulation of body fluid levels	-9.08426	-5.85148	150,151,231,2778,4780,6531,6532,7421	ADRA2A,ADRA2B,AKR1B1,GNAS,NFE2L2,SLC6A3,SLC6A4,VDR	8/355
5_Member	GO Biological Processes	GO:0071880	adenylate cyclase-activating adrenergic receptor signaling pathway	-8.55548	-5.4392	150,151,1814,2778	ADRA2A,ADRA2B,DRD3,GNAS	4/20
5_Member	GO Biological Processes	GO:0071875	adrenergic receptor signaling pathway	-8.14005	-5.07208	150,151,1814,2778	ADRA2A,ADRA2B,DRD3,GNAS	4/25
5_Member	GO Biological Processes	GO:0007565	female pregnancy	-7.97053	-4.96623	150,151,2778,4313,5467,7421	ADRA2A,ADRA2B,GNAS,MMP2,PPARD,VDR	6/173
5_Member	GO Biological Processes	GO:0008015	blood circulation	-7.07539	-4.26015	150,151,1814,2740,4313,5468,6532	ADRA2A,ADRA2B,DRD3,GLP1R,MMP2,PPARG,SLC6A4	7/419
5_Member	GO Biological Processes	GO:1903522	regulation of blood circulation	-6.91971	-4.17505	150,151,2740,3320,4313,7068	ADRA2A,ADRA2B,GLP1R,HSP90AA1,MMP2,THRB	6/260
5_Member	GO Biological Processes	GO:0007189	adenylate cyclase-activating G protein-coupled receptor signaling pathway	-6.57728	-3.89331	150,151,1814,2740,2778	ADRA2A,ADRA2B,DRD3,GLP1R,GNAS	5/152
5_Member	GO Biological Processes	GO:0003013	circulatory system process	-6.50388	-3.8384	150,151,1814,2740,4313,5468,6532	ADRA2A,ADRA2B,DRD3,GLP1R,MMP2,PPARG,SLC6A4	7/509
5_Member	GO Biological Processes	GO:0044057	regulation of system process	-6.16898	-3.56262	150,151,2740,3320,4313,5468,7068	ADRA2A,ADRA2B,GLP1R,HSP90AA1,MMP2,PPARG,THRB	7/571
5_Member	GO Molecular Functions	GO:0042562	hormone binding	-5.81432	-3.25292	150,151,2740,7068	ADRA2A,ADRA2B,GLP1R,THRB	4/92
5_Member	GO Biological Processes	GO:0030168	platelet activation	-5.66935	-3.1288	150,151,2778,6532	ADRA2A,ADRA2B,GNAS,SLC6A4	4/100
5_Member	GO Biological Processes	GO:0009611	response to wounding	-5.63906	-3.11188	150,151,2778,4313,5467,6532	ADRA2A,ADRA2B,GNAS,MMP2,PPARD,SLC6A4	6/431
5_Member	GO Biological Processes	GO:0007188	adenylate cyclase-modulating G protein-coupled receptor signaling pathway	-5.59899	-3.07834	150,151,1814,2740,2778	ADRA2A,ADRA2B,DRD3,GLP1R,GNAS	5/240
5_Member	GO Biological Processes	GO:0050433	regulation of catecholamine secretion	-5.10291	-2.66467	150,151,1814	ADRA2A,ADRA2B,DRD3	3/42
5_Member	GO Biological Processes	GO:0042060	wound healing	-4.9852	-2.60227	150,151,2778,5467,6532	ADRA2A,ADRA2B,GNAS,PPARD,SLC6A4	5/321
5_Member	GO Biological Processes	GO:0035296	regulation of tube diameter	-4.93595	-2.5715	150,151,4313,6532	ADRA2A,ADRA2B,MMP2,SLC6A4	4/153
5_Member	GO Biological Processes	GO:0097746	blood vessel diameter maintenance	-4.93595	-2.5715	150,151,4313,6532	ADRA2A,ADRA2B,MMP2,SLC6A4	4/153
5_Member	GO Biological Processes	GO:0035150	regulation of tube size	-4.9248	-2.56485	150,151,4313,6532	ADRA2A,ADRA2B,MMP2,SLC6A4	4/154
5_Member	GO Biological Processes	GO:0007596	blood coagulation	-4.70644	-2.39314	150,151,2778,6532	ADRA2A,ADRA2B,GNAS,SLC6A4	4/175
5_Member	KEGG Pathway	hsa04080	Neuroactive ligand-receptor interaction	-4.69969	-2.39039	150,151,1814,2740,7068	ADRA2A,ADRA2B,DRD3,GLP1R,THRB	5/368
5_Member	GO Biological Processes	GO:0050817	coagulation	-4.68708	-2.38175	150,151,2778,6532	ADRA2A,ADRA2B,GNAS,SLC6A4	4/177
5_Member	GO Biological Processes	GO:0007599	hemostasis	-4.64903	-2.35539	150,151,2778,6532	ADRA2A,ADRA2B,GNAS,SLC6A4	4/181
5_Member	GO Biological Processes	GO:0008217	regulation of blood pressure	-4.59356	-2.3113	151,1814,2740,5468	ADRA2B,DRD3,GLP1R,PPARG	4/187
5_Member	GO Biological Processes	GO:0019229	regulation of vasoconstriction	-4.46985	-2.20948	150,151,4313	ADRA2A,ADRA2B,MMP2	3/68
5_Member	GO Biological Processes	GO:0051952	regulation of amine transport	-4.21062	-1.991	150,151,1814	ADRA2A,ADRA2B,DRD3	3/83
5_Member	GO Biological Processes	GO:0090257	regulation of muscle system process	-4.08957	-1.89818	150,151,3320,5468	ADRA2A,ADRA2B,HSP90AA1,PPARG	4/252
5_Member	GO Biological Processes	GO:0090066	regulation of anatomical structure size	-4.06324	-1.87789	150,151,3320,4313,6532	ADRA2A,ADRA2B,HSP90AA1,MMP2,SLC6A4	5/501
5_Member	GO Biological Processes	GO:0010469	regulation of signaling receptor activity	-3.99575	-1.81929	150,151,5468	ADRA2A,ADRA2B,PPARG	3/98
5_Member	GO Biological Processes	GO:0003018	vascular process in circulatory system	-3.94938	-1.77875	150,151,4313,6532	ADRA2A,ADRA2B,MMP2,SLC6A4	4/274
5_Member	GO Biological Processes	GO:1903531	negative regulation of secretion by cell	-3.43358	-1.38571	150,151,1814	ADRA2A,ADRA2B,DRD3	3/152
5_Member	GO Biological Processes	GO:0010562	positive regulation of phosphorus metabolic process	-3.40934	-1.36738	150,151,3320,7157,9971	ADRA2A,ADRA2B,HSP90AA1,TP53,NR1H4	5/693
5_Member	GO Biological Processes	GO:0045937	positive regulation of phosphate metabolic process	-3.40934	-1.36738	150,151,3320,7157,9971	ADRA2A,ADRA2B,HSP90AA1,TP53,NR1H4	5/693
5_Member	GO Biological Processes	GO:0001775	cell activation	-3.3063	-1.27554	150,151,2778,6532,7157	ADRA2A,ADRA2B,GNAS,SLC6A4,TP53	5/730
5_Member	GO Biological Processes	GO:0006937	regulation of muscle contraction	-3.27688	-1.25444	150,151,3320	ADRA2A,ADRA2B,HSP90AA1	3/172
5_Member	GO Biological Processes	GO:0051048	negative regulation of secretion	-3.26955	-1.24916	150,151,1814	ADRA2A,ADRA2B,DRD3	3/173
5_Member	GO Biological Processes	GO:0031401	positive regulation of protein modification process	-3.23989	-1.22358	150,151,3309,3320,7157	ADRA2A,ADRA2B,HSPA5,HSP90AA1,TP53	5/755
5_Member	GO Biological Processes	GO:0045859	regulation of protein kinase activity	-3.1143	-1.12168	150,151,3320,5468	ADRA2A,ADRA2B,HSP90AA1,PPARG	4/455
5_Member	GO Biological Processes	GO:0043549	regulation of kinase activity	-2.90874	-0.934927	150,151,3320,5468	ADRA2A,ADRA2B,HSP90AA1,PPARG	4/517
5_Member	GO Biological Processes	GO:0045860	positive regulation of protein kinase activity	-2.82817	-0.863461	150,151,3320	ADRA2A,ADRA2B,HSP90AA1	3/246
5_Member	GO Biological Processes	GO:0001934	positive regulation of protein phosphorylation	-2.75608	-0.800295	150,151,3320,7157	ADRA2A,ADRA2B,HSP90AA1,TP53	4/569
5_Member	GO Biological Processes	GO:0042327	positive regulation of phosphorylation	-2.63589	-0.704141	150,151,3320,7157	ADRA2A,ADRA2B,HSP90AA1,TP53	4/614
5_Member	GO Biological Processes	GO:0033674	positive regulation of kinase activity	-2.61629	-0.687905	150,151,3320	ADRA2A,ADRA2B,HSP90AA1	3/292
5_Member	GO Biological Processes	GO:0051338	regulation of transferase activity	-2.61303	-0.687905	150,151,3320,5468	ADRA2A,ADRA2B,HSP90AA1,PPARG	4/623
5_Member	GO Biological Processes	GO:0043408	regulation of MAPK cascade	-2.52037	-0.606619	150,151,1814,5468	ADRA2A,ADRA2B,DRD3,PPARG	4/661
5_Member	GO Biological Processes	GO:0006259	DNA metabolic process	-2.35806	-0.479685	150,3320,7157,55775	ADRA2A,HSP90AA1,TP53,TDP1	4/734
5_Member	GO Biological Processes	GO:0051347	positive regulation of transferase activity	-2.34747	-0.474965	150,151,3320	ADRA2A,ADRA2B,HSP90AA1	3/364
5_Member	GO Biological Processes	GO:0051051	negative regulation of transport	-2.06479	-0.21912	150,151,1814	ADRA2A,ADRA2B,DRD3	3/461
5_Member	GO Biological Processes	GO:0043410	positive regulation of MAPK cascade	-2.0495	-0.205202	150,151,1814	ADRA2A,ADRA2B,DRD3	3/467
6_Summary	GO Biological Processes	GO:0071417	cellular response to organonitrogen compound	-9.30661	-5.98678	196,1814,2740,2778,4780,5468,6532,7157,9971,3320,3309,150,7421,240	AHR,DRD3,GLP1R,GNAS,NFE2L2,PPARG,SLC6A4,TP53,NR1H4,HSP90AA1,HSPA5,ADRA2A,VDR,ALOX5	14/-
6_Member	GO Biological Processes	GO:0071417	cellular response to organonitrogen compound	-9.30661	-5.98678	196,1814,2740,2778,4780,5468,6532,7157,9971	AHR,DRD3,GLP1R,GNAS,NFE2L2,PPARG,SLC6A4,TP53,NR1H4	9/507
6_Member	GO Biological Processes	GO:1901699	cellular response to nitrogen compound	-8.78197	-5.61134	196,1814,2740,2778,4780,5468,6532,7157,9971	AHR,DRD3,GLP1R,GNAS,NFE2L2,PPARG,SLC6A4,TP53,NR1H4	9/582
6_Member	GO Biological Processes	GO:0034248	regulation of amide metabolic process	-4.24226	-2.01611	4780,7157,9971	NFE2L2,TP53,NR1H4	3/81
6_Member	GO Biological Processes	GO:0002831	regulation of response to biotic stimulus	-3.89934	-1.74381	196,3320,4780,5468,9971	AHR,HSP90AA1,NFE2L2,PPARG,NR1H4	5/543
6_Member	GO Biological Processes	GO:1902532	negative regulation of intracellular signal transduction	-3.37809	-1.33932	1814,3309,4780,5468,9971	DRD3,HSPA5,NFE2L2,PPARG,NR1H4	5/704
6_Member	GO Biological Processes	GO:0045088	regulation of innate immune response	-3.1143	-1.12168	3320,4780,5468,9971	HSP90AA1,NFE2L2,PPARG,NR1H4	4/455
6_Member	GO Molecular Functions	GO:0001228	DNA-binding transcription activator activity, RNA polymerase II-specific	-3.04483	-1.0624	4780,5468,7157,9971	NFE2L2,PPARG,TP53,NR1H4	4/475
6_Member	GO Molecular Functions	GO:0001216	DNA-binding transcription activator activity	-3.0246	-1.04523	4780,5468,7157,9971	NFE2L2,PPARG,TP53,NR1H4	4/481
6_Member	GO Biological Processes	GO:0071375	cellular response to peptide hormone stimulus	-2.81811	-0.855202	2740,4780,5468	GLP1R,NFE2L2,PPARG	3/248
6_Member	GO Biological Processes	GO:0030162	regulation of proteolysis	-2.67484	-0.736358	150,4780,5468,7157	ADRA2A,NFE2L2,PPARG,TP53	4/599
6_Member	GO Biological Processes	GO:0019725	cellular homeostasis	-2.45134	-0.551774	1814,4780,7421,9971	DRD3,NFE2L2,VDR,NR1H4	4/691
6_Member	GO Biological Processes	GO:0045862	positive regulation of proteolysis	-2.44097	-0.542949	150,4780,5468	ADRA2A,NFE2L2,PPARG	3/337
6_Member	GO Biological Processes	GO:0045765	regulation of angiogenesis	-2.37097	-0.488143	240,4780,5468	ALOX5,NFE2L2,PPARG	3/357
6_Member	GO Biological Processes	GO:1901342	regulation of vasculature development	-2.34085	-0.469795	240,4780,5468	ALOX5,NFE2L2,PPARG	3/366
6_Member	GO Biological Processes	GO:0043434	response to peptide hormone	-2.29555	-0.433121	2740,4780,5468	GLP1R,NFE2L2,PPARG	3/380
7_Summary	GO Biological Processes	GO:0048511	rhythmic process	-8.37294	-5.28149	196,1814,4313,5468,6532,7157,23435,150,6256	AHR,DRD3,MMP2,PPARG,SLC6A4,TP53,TARDBP,ADRA2A,RXRA	9/-
7_Member	GO Biological Processes	GO:0048511	rhythmic process	-8.37294	-5.28149	196,1814,4313,5468,6532,7157,23435	AHR,DRD3,MMP2,PPARG,SLC6A4,TP53,TARDBP	7/271
7_Member	GO Biological Processes	GO:0007623	circadian rhythm	-5.11296	-2.66932	196,1814,6532,7157	AHR,DRD3,SLC6A4,TP53	4/138
7_Member	GO Biological Processes	GO:0032409	regulation of transporter activity	-4.10967	-1.90908	150,1814,5468,6256	ADRA2A,DRD3,PPARG,RXRA	4/249
7_Member	GO Biological Processes	GO:0009416	response to light stimulus	-2.52721	-0.610237	1814,4313,7157	DRD3,MMP2,TP53	3/314
7_Member	GO Molecular Functions	GO:0046982	protein heterodimerization activity	-2.39498	-0.5031	150,196,7157	ADRA2A,AHR,TP53	3/350
7_Member	GO Biological Processes	GO:0044092	negative regulation of molecular function	-2.35806	-0.479685	150,1814,5468,7157	ADRA2A,DRD3,PPARG,TP53	4/734
7_Member	GO Biological Processes	GO:0009314	response to radiation	-2.15856	-0.305995	1814,4313,7157	DRD3,MMP2,TP53	3/426
7_Member	GO Biological Processes	GO:0043086	negative regulation of catalytic activity	-2.12549	-0.277072	1814,5468,7157	DRD3,PPARG,TP53	3/438
8_Summary	GO Biological Processes	GO:0010817	regulation of hormone levels	-7.65642	-4.75685	150,231,240,1576,2740,5468,9971,23435,151,1814,6532,3320	ADRA2A,AKR1B1,ALOX5,CYP3A4,GLP1R,PPARG,NR1H4,TARDBP,ADRA2B,DRD3,SLC6A4,HSP90AA1	12/-
8_Member	GO Biological Processes	GO:0010817	regulation of hormone levels	-7.65642	-4.75685	150,231,240,1576,2740,5468,9971,23435	ADRA2A,AKR1B1,ALOX5,CYP3A4,GLP1R,PPARG,NR1H4,TARDBP	8/541
8_Member	GO Biological Processes	GO:1903530	regulation of secretion by cell	-7.5828	-4.69847	150,151,240,1814,5468,6532,9971,23435	ADRA2A,ADRA2B,ALOX5,DRD3,PPARG,SLC6A4,NR1H4,TARDBP	8/553
8_Member	GO Biological Processes	GO:0051046	regulation of secretion	-7.27104	-4.42947	150,151,240,1814,5468,6532,9971,23435	ADRA2A,ADRA2B,ALOX5,DRD3,PPARG,SLC6A4,NR1H4,TARDBP	8/607
8_Member	GO Biological Processes	GO:0051223	regulation of protein transport	-6.94466	-4.189	150,240,1814,3320,5468,9971,23435	ADRA2A,ALOX5,DRD3,HSP90AA1,PPARG,NR1H4,TARDBP	7/438
8_Member	GO Biological Processes	GO:0050708	regulation of protein secretion	-6.86132	-4.12738	150,240,1814,5468,9971,23435	ADRA2A,ALOX5,DRD3,PPARG,NR1H4,TARDBP	6/266
8_Member	GO Biological Processes	GO:0070201	regulation of establishment of protein localization	-6.35302	-3.71386	150,240,1814,3320,5468,9971,23435	ADRA2A,ALOX5,DRD3,HSP90AA1,PPARG,NR1H4,TARDBP	7/536
8_Member	GO Biological Processes	GO:0046883	regulation of hormone secretion	-5.4704	-2.96877	150,240,5468,9971,23435	ADRA2A,ALOX5,PPARG,NR1H4,TARDBP	5/255
8_Member	GO Biological Processes	GO:0050796	regulation of insulin secretion	-4.77606	-2.44186	150,240,9971,23435	ADRA2A,ALOX5,NR1H4,TARDBP	4/168
8_Member	GO Biological Processes	GO:0090276	regulation of peptide hormone secretion	-4.49651	-2.22533	150,240,9971,23435	ADRA2A,ALOX5,NR1H4,TARDBP	4/198
8_Member	GO Biological Processes	GO:0002791	regulation of peptide secretion	-4.47101	-2.20948	150,240,9971,23435	ADRA2A,ALOX5,NR1H4,TARDBP	4/201
8_Member	GO Biological Processes	GO:0090087	regulation of peptide transport	-4.47101	-2.20948	150,240,9971,23435	ADRA2A,ALOX5,NR1H4,TARDBP	4/201
8_Member	GO Biological Processes	GO:0042593	glucose homeostasis	-4.36492	-2.11626	150,240,5468,9971	ADRA2A,ALOX5,PPARG,NR1H4	4/214
8_Member	GO Biological Processes	GO:0033500	carbohydrate homeostasis	-4.35704	-2.11412	150,240,5468,9971	ADRA2A,ALOX5,PPARG,NR1H4	4/215
8_Member	GO Biological Processes	GO:0051222	positive regulation of protein transport	-4.08957	-1.89818	3320,5468,9971,23435	HSP90AA1,PPARG,NR1H4,TARDBP	4/252
8_Member	GO Biological Processes	GO:1903532	positive regulation of secretion by cell	-3.84893	-1.70632	5468,6532,9971,23435	PPARG,SLC6A4,NR1H4,TARDBP	4/291
8_Member	GO Biological Processes	GO:0051047	positive regulation of secretion	-3.72774	-1.60112	5468,6532,9971,23435	PPARG,SLC6A4,NR1H4,TARDBP	4/313
8_Member	GO Biological Processes	GO:1904951	positive regulation of establishment of protein localization	-3.65016	-1.54647	3320,5468,9971,23435	HSP90AA1,PPARG,NR1H4,TARDBP	4/328
8_Member	GO Biological Processes	GO:0046887	positive regulation of hormone secretion	-3.50237	-1.4344	5468,9971,23435	PPARG,NR1H4,TARDBP	3/144
8_Member	GO Biological Processes	GO:0050714	positive regulation of protein secretion	-3.47612	-1.4172	5468,9971,23435	PPARG,NR1H4,TARDBP	3/147
8_Member	GO Biological Processes	GO:1903829	positive regulation of protein localization	-3.01127	-1.03376	3320,5468,9971,23435	HSP90AA1,PPARG,NR1H4,TARDBP	4/485
9_Summary	KEGG Pathway	hsa05207	Chemical carcinogenesis - receptor activation	-7.40805	-4.54072	196,1576,2778,3320,6256,7421,9971	AHR,CYP3A4,GNAS,HSP90AA1,RXRA,VDR,NR1H4	7/-
9_Member	KEGG Pathway	hsa05207	Chemical carcinogenesis - receptor activation	-7.40805	-4.54072	196,1576,2778,3320,6256,7421	AHR,CYP3A4,GNAS,HSP90AA1,RXRA,VDR	6/215
9_Member	KEGG Pathway	hsa04976	Bile secretion	-5.8526	-3.28402	1576,2778,6256,9971	CYP3A4,GNAS,RXRA,NR1H4	4/90
9_Member	GO Molecular Functions	GO:0005496	steroid binding	-3.88256	-1.73449	1576,7421,9971	CYP3A4,VDR,NR1H4	3/107
10_Summary	KEGG Pathway	hsa05417	Lipid and atherosclerosis	-7.39609	-4.54072	3309,3320,4780,5468,6256,7157,2778,6531,231,4313,4353,23435,240,150	HSPA5,HSP90AA1,NFE2L2,PPARG,RXRA,TP53,GNAS,SLC6A3,AKR1B1,MMP2,MPO,TARDBP,ALOX5,ADRA2A	14/-
10_Member	KEGG Pathway	hsa05417	Lipid and atherosclerosis	-7.39609	-4.54072	3309,3320,4780,5468,6256,7157	HSPA5,HSP90AA1,NFE2L2,PPARG,RXRA,TP53	6/216
10_Member	GO Biological Processes	GO:0006984	ER-nucleus signaling pathway	-5.42356	-2.93417	3309,4780,7157	HSPA5,NFE2L2,TP53	3/33
10_Member	KEGG Pathway	hsa05012	Parkinson disease	-5.34164	-2.85824	2778,3309,4780,6531,7157	GNAS,HSPA5,NFE2L2,SLC6A3,TP53	5/271
10_Member	GO Biological Processes	GO:0062197	cellular response to chemical stress	-5.25017	-2.78426	231,4313,4353,4780,7157	AKR1B1,MMP2,MPO,NFE2L2,TP53	5/283
10_Member	KEGG Pathway	hsa05418	Fluid shear stress and atherosclerosis	-5.07601	-2.64837	3320,4313,4780,7157	HSP90AA1,MMP2,NFE2L2,TP53	4/141
10_Member	GO Biological Processes	GO:0042149	cellular response to glucose starvation	-5.01167	-2.61434	3309,4780,7157	HSPA5,NFE2L2,TP53	3/45
10_Member	GO Molecular Functions	GO:0019904	protein domain specific binding	-4.60427	-2.31825	3309,3320,4780,5468,6256,7157	HSPA5,HSP90AA1,NFE2L2,PPARG,RXRA,TP53	6/655
10_Member	GO Biological Processes	GO:0034599	cellular response to oxidative stress	-4.27279	-2.04001	4313,4353,4780,7157	MMP2,MPO,NFE2L2,TP53	4/226
10_Member	GO Biological Processes	GO:0034976	response to endoplasmic reticulum stress	-4.26534	-2.03589	3309,4780,7157,23435	HSPA5,NFE2L2,TP53,TARDBP	4/227
10_Member	GO Biological Processes	GO:1905897	regulation of response to endoplasmic reticulum stress	-4.17976	-1.96337	240,3309,4780	ALOX5,HSPA5,NFE2L2	3/85
10_Member	GO Molecular Functions	GO:0031625	ubiquitin protein ligase binding	-3.77073	-1.64149	3309,3320,4780,7157	HSPA5,HSP90AA1,NFE2L2,TP53	4/305
10_Member	GO Biological Processes	GO:0006986	response to unfolded protein	-3.72468	-1.60067	3309,3320,4780	HSPA5,HSP90AA1,NFE2L2	3/121
10_Member	GO Molecular Functions	GO:0044389	ubiquitin-like protein ligase binding	-3.67047	-1.5618	3309,3320,4780,7157	HSPA5,HSP90AA1,NFE2L2,TP53	4/324
10_Member	GO Biological Processes	GO:0034614	cellular response to reactive oxygen species	-3.58465	-1.49561	4313,4353,4780	MMP2,MPO,NFE2L2	3/135
10_Member	GO Biological Processes	GO:0035966	response to topologically incorrect protein	-3.55661	-1.4747	3309,3320,4780	HSPA5,HSP90AA1,NFE2L2	3/138
10_Member	GO Biological Processes	GO:0061041	regulation of wound healing	-3.55661	-1.4747	150,240,4780	ADRA2A,ALOX5,NFE2L2	3/138
10_Member	GO Biological Processes	GO:2000377	regulation of reactive oxygen species metabolic process	-3.46749	-1.4108	240,4780,7157	ALOX5,NFE2L2,TP53	3/148
10_Member	GO Biological Processes	GO:0006979	response to oxidative stress	-3.46039	-1.40667	4313,4353,4780,7157	MMP2,MPO,NFE2L2,TP53	4/368
10_Member	KEGG Pathway	hsa04141	Protein processing in endoplasmic reticulum	-3.29167	-1.26694	3309,3320,4780	HSPA5,HSP90AA1,NFE2L2	3/170
10_Member	GO Biological Processes	GO:0009267	cellular response to starvation	-3.25502	-1.23668	3309,4780,7157	HSPA5,NFE2L2,TP53	3/175
10_Member	GO Biological Processes	GO:1903034	regulation of response to wounding	-3.22648	-1.21421	150,240,4780	ADRA2A,ALOX5,NFE2L2	3/179
10_Member	GO Biological Processes	GO:0000302	response to reactive oxygen species	-3.20551	-1.20121	4313,4353,4780	MMP2,MPO,NFE2L2	3/182
10_Member	GO Biological Processes	GO:2001242	regulation of intrinsic apoptotic signaling pathway	-3.15794	-1.16147	4313,4780,7157	MMP2,NFE2L2,TP53	3/189
10_Member	GO Biological Processes	GO:0045732	positive regulation of protein catabolic process	-3.06194	-1.07695	150,3320,4780	ADRA2A,HSP90AA1,NFE2L2	3/204
10_Member	GO Biological Processes	GO:0042594	response to starvation	-2.99033	-1.01467	3309,4780,7157	HSPA5,NFE2L2,TP53	3/216
10_Member	GO Biological Processes	GO:0080135	regulation of cellular response to stress	-2.88115	-0.911462	240,3309,4780,7157	ALOX5,HSPA5,NFE2L2,TP53	4/526
10_Member	GO Biological Processes	GO:0030335	positive regulation of cell migration	-2.68541	-0.743521	150,3309,4313,4780	ADRA2A,HSPA5,MMP2,NFE2L2	4/595
10_Member	GO Biological Processes	GO:0009896	positive regulation of catabolic process	-2.61303	-0.687905	150,3320,4780,23435	ADRA2A,HSP90AA1,NFE2L2,TARDBP	4/623
10_Member	GO Biological Processes	GO:2000147	positive regulation of cell motility	-2.61303	-0.687905	150,3309,4313,4780	ADRA2A,HSPA5,MMP2,NFE2L2	4/623
10_Member	GO Biological Processes	GO:0040017	positive regulation of locomotion	-2.57818	-0.659586	150,3309,4313,4780	ADRA2A,HSPA5,MMP2,NFE2L2	4/637
10_Member	GO Biological Processes	GO:0030163	protein catabolic process	-2.37707	-0.490046	3309,3320,4313,4780	HSPA5,HSP90AA1,MMP2,NFE2L2	4/725
10_Member	GO Biological Processes	GO:0071345	cellular response to cytokine stimulus	-2.35179	-0.476832	3309,4313,4780,7157	HSPA5,MMP2,NFE2L2,TP53	4/737
10_Member	GO Biological Processes	GO:0042176	regulation of protein catabolic process	-2.3508	-0.476832	150,3320,4780	ADRA2A,HSP90AA1,NFE2L2	3/363
10_Member	GO Biological Processes	GO:2001233	regulation of apoptotic signaling pathway	-2.24594	-0.386354	4313,4780,7157	MMP2,NFE2L2,TP53	3/396
11_Summary	GO Biological Processes	GO:0022617	extracellular matrix disassembly	-7.03524	-4.24482	4313,4322,9507,11096,7157,3320	MMP2,MMP13,ADAMTS4,ADAMTS5,TP53,HSP90AA1	6/-
11_Member	GO Biological Processes	GO:0022617	extracellular matrix disassembly	-7.03524	-4.24482	4313,4322,9507,11096	MMP2,MMP13,ADAMTS4,ADAMTS5	4/46
11_Member	GO Molecular Functions	GO:0004222	metalloendopeptidase activity	-5.5041	-2.99623	4313,4322,9507,11096	MMP2,MMP13,ADAMTS4,ADAMTS5	4/110
11_Member	GO Biological Processes	GO:0022411	cellular component disassembly	-4.74548	-2.42406	4313,4322,7157,9507,11096	MMP2,MMP13,TP53,ADAMTS4,ADAMTS5	5/360
11_Member	GO Molecular Functions	GO:0008237	metallopeptidase activity	-4.61184	-2.32202	4313,4322,9507,11096	MMP2,MMP13,ADAMTS4,ADAMTS5	4/185
11_Member	GO Biological Processes	GO:0030198	extracellular matrix organization	-3.94329	-1.77554	4313,4322,9507,11096	MMP2,MMP13,ADAMTS4,ADAMTS5	4/275
11_Member	GO Biological Processes	GO:0043062	extracellular structure organization	-3.93723	-1.77235	4313,4322,9507,11096	MMP2,MMP13,ADAMTS4,ADAMTS5	4/276
11_Member	GO Biological Processes	GO:0045229	external encapsulating structure organization	-3.93118	-1.77198	4313,4322,9507,11096	MMP2,MMP13,ADAMTS4,ADAMTS5	4/277
11_Member	GO Cellular Components	GO:0031012	extracellular matrix	-3.82963	-1.68973	3320,4313,4322,9507,11096	HSP90AA1,MMP2,MMP13,ADAMTS4,ADAMTS5	5/562
11_Member	GO Cellular Components	GO:0030312	external encapsulating structure	-3.82603	-1.68882	3320,4313,4322,9507,11096	HSP90AA1,MMP2,MMP13,ADAMTS4,ADAMTS5	5/563
11_Member	GO Molecular Functions	GO:0004175	endopeptidase activity	-3.33197	-1.29699	4313,4322,9507,11096	MMP2,MMP13,ADAMTS4,ADAMTS5	4/398
11_Member	GO Cellular Components	GO:0062023	collagen-containing extracellular matrix	-3.21351	-1.20618	3320,4313,9507,11096	HSP90AA1,MMP2,ADAMTS4,ADAMTS5	4/428
11_Member	GO Molecular Functions	GO:0008233	peptidase activity	-2.64618	-0.71107	4313,4322,9507,11096	MMP2,MMP13,ADAMTS4,ADAMTS5	4/610
12_Summary	GO Molecular Functions	GO:1901338	catecholamine binding	-6.6987	-3.98544	150,151,6531,2778,5467,6532,7157,196,9507,3320,3309,4313	ADRA2A,ADRA2B,SLC6A3,GNAS,PPARD,SLC6A4,TP53,AHR,ADAMTS4,HSP90AA1,HSPA5,MMP2	12/-
12_Member	GO Molecular Functions	GO:1901338	catecholamine binding	-6.6987	-3.98544	150,151,6531	ADRA2A,ADRA2B,SLC6A3	3/13
12_Member	GO Biological Processes	GO:0048638	regulation of developmental growth	-3.70145	-1.58261	2778,5467,6531,6532	GNAS,PPARD,SLC6A3,SLC6A4	4/318
12_Member	GO Biological Processes	GO:0040008	regulation of growth	-3.67421	-1.56302	2778,5467,6531,6532,7157	GNAS,PPARD,SLC6A3,SLC6A4,TP53	5/607
12_Member	GO Biological Processes	GO:0046683	response to organophosphorus	-3.63286	-1.53655	196,6531,6532	AHR,SLC6A3,SLC6A4	3/130
12_Member	GO Molecular Functions	GO:0002020	protease binding	-3.55661	-1.4747	6531,7157,9507	SLC6A3,TP53,ADAMTS4	3/138
12_Member	GO Molecular Functions	GO:0019903	protein phosphatase binding	-3.51124	-1.43867	3320,6531,7157	HSP90AA1,SLC6A3,TP53	3/143
12_Member	GO Biological Processes	GO:0014074	response to purine-containing compound	-3.49355	-1.43013	196,6531,6532	AHR,SLC6A3,SLC6A4	3/145
12_Member	GO Cellular Components	GO:0042734	presynaptic membrane	-3.29914	-1.27048	150,6531,6532	ADRA2A,SLC6A3,SLC6A4	3/169
12_Member	GO Biological Processes	GO:0060322	head development	-3.17336	-1.17299	3309,4313,6531,6532,7157	HSPA5,MMP2,SLC6A3,SLC6A4,TP53	5/781
12_Member	GO Molecular Functions	GO:0019902	phosphatase binding	-3.15794	-1.16147	3320,6531,7157	HSP90AA1,SLC6A3,TP53	3/189
12_Member	GO Biological Processes	GO:0097305	response to alcohol	-2.74531	-0.793036	196,2778,6531	AHR,GNAS,SLC6A3	3/263
12_Member	GO Cellular Components	GO:0150034	distal axon	-2.69467	-0.749341	150,3320,6531	ADRA2A,HSP90AA1,SLC6A3	3/274
12_Member	GO Cellular Components	GO:0045211	postsynaptic membrane	-2.66794	-0.731153	150,6531,6532	ADRA2A,SLC6A3,SLC6A4	3/280
12_Member	GO Biological Processes	GO:0007420	brain development	-2.36437	-0.483026	3309,6531,6532,7157	HSPA5,SLC6A3,SLC6A4,TP53	4/731
12_Member	GO Cellular Components	GO:0097060	synaptic membrane	-2.23089	-0.374119	150,6531,6532	ADRA2A,SLC6A3,SLC6A4	3/401
13_Summary	GO Biological Processes	GO:0042220	response to cocaine	-6.68566	-3.98239	1814,3320,6531,6532,2740,2778,7068,7157,7421,150	DRD3,HSP90AA1,SLC6A3,SLC6A4,GLP1R,GNAS,THRB,TP53,VDR,ADRA2A	10/-
13_Member	GO Biological Processes	GO:0042220	response to cocaine	-6.68566	-3.98239	1814,3320,6531,6532	DRD3,HSP90AA1,SLC6A3,SLC6A4	4/56
13_Member	GO Biological Processes	GO:0043279	response to alkaloid	-5.65207	-3.11826	1814,3320,6531,6532	DRD3,HSP90AA1,SLC6A3,SLC6A4	4/101
13_Member	GO Biological Processes	GO:0045761	regulation of adenylate cyclase activity	-5.04137	-2.63913	1814,2740,2778	DRD3,GLP1R,GNAS	3/44
13_Member	GO Biological Processes	GO:0050890	cognition	-4.9852	-2.60227	1814,2740,2778,6531,6532	DRD3,GLP1R,GNAS,SLC6A3,SLC6A4	5/321
13_Member	GO Biological Processes	GO:0031279	regulation of cyclase activity	-4.77155	-2.44186	1814,2740,2778	DRD3,GLP1R,GNAS	3/54
13_Member	GO Biological Processes	GO:0007610	behavior	-4.7463	-2.42406	1814,2740,6531,6532,7068,7157	DRD3,GLP1R,SLC6A3,SLC6A4,THRB,TP53	6/618
13_Member	GO Biological Processes	GO:0051339	regulation of lyase activity	-4.6778	-2.3764	1814,2740,2778	DRD3,GLP1R,GNAS	3/58
13_Member	GO Biological Processes	GO:0046903	secretion	-3.89561	-1.74381	1814,2740,2778,6531,7421	DRD3,GLP1R,GNAS,SLC6A3,VDR	5/544
13_Member	KEGG Pathway	hsa04728	Dopaminergic synapse	-3.61335	-1.5219	1814,2778,6531	DRD3,GNAS,SLC6A3	3/132
13_Member	GO Biological Processes	GO:0050905	neuromuscular process	-3.45042	-1.40036	1814,3320,6531	DRD3,HSP90AA1,SLC6A3	3/150
13_Member	GO Biological Processes	GO:0007611	learning or memory	-2.68123	-0.741044	1814,2740,6532	DRD3,GLP1R,SLC6A4	3/277
13_Member	GO Biological Processes	GO:0043269	regulation of monoatomic ion transport	-2.04445	-0.202878	150,1814,6532	ADRA2A,DRD3,SLC6A4	3/469
14_Summary	GO Biological Processes	GO:1901615	organic hydroxy compound metabolic process	-6.65734	-3.96383	231,1576,1814,5467,6531,7157,9971,240,5468,4780,4353	AKR1B1,CYP3A4,DRD3,PPARD,SLC6A3,TP53,NR1H4,ALOX5,PPARG,NFE2L2,MPO	11/-
14_Member	GO Biological Processes	GO:1901615	organic hydroxy compound metabolic process	-6.65734	-3.96383	231,1576,1814,5467,6531,7157,9971	AKR1B1,CYP3A4,DRD3,PPARD,SLC6A3,TP53,NR1H4	7/483
14_Member	GO Biological Processes	GO:0032787	monocarboxylic acid metabolic process	-6.43581	-3.77929	231,240,1576,5467,5468,7157,9971	AKR1B1,ALOX5,CYP3A4,PPARD,PPARG,TP53,NR1H4	7/521
14_Member	GO Biological Processes	GO:0019752	carboxylic acid metabolic process	-5.22879	-2.76856	231,240,1576,5467,5468,7157,9971	AKR1B1,ALOX5,CYP3A4,PPARD,PPARG,TP53,NR1H4	7/792
14_Member	GO Biological Processes	GO:0006631	fatty acid metabolic process	-4.9657	-2.58746	231,240,1576,5467,5468	AKR1B1,ALOX5,CYP3A4,PPARD,PPARG	5/324
14_Member	GO Biological Processes	GO:0019748	secondary metabolic process	-4.95427	-2.58068	231,1576,4780	AKR1B1,CYP3A4,NFE2L2	3/47
14_Member	GO Biological Processes	GO:0008202	steroid metabolic process	-4.04361	-1.86421	231,1576,5467,9971	AKR1B1,CYP3A4,PPARD,NR1H4	4/259
14_Member	GO Biological Processes	GO:0120254	olefinic compound metabolic process	-3.49355	-1.43013	231,240,1576	AKR1B1,ALOX5,CYP3A4	3/145
14_Member	GO Biological Processes	GO:0030258	lipid modification	-3.31421	-1.28135	240,1576,5467	ALOX5,CYP3A4,PPARD	3/167
14_Member	GO Biological Processes	GO:0044283	small molecule biosynthetic process	-3.08962	-1.10083	231,240,1576,4353	AKR1B1,ALOX5,CYP3A4,MPO	4/462
14_Member	GO Biological Processes	GO:0046394	carboxylic acid biosynthetic process	-2.70371	-0.754926	231,240,1576	AKR1B1,ALOX5,CYP3A4	3/272
14_Member	GO Biological Processes	GO:0016053	organic acid biosynthetic process	-2.69017	-0.746565	231,240,1576	AKR1B1,ALOX5,CYP3A4	3/275
14_Member	GO Biological Processes	GO:0006066	alcohol metabolic process	-2.48515	-0.57933	231,1576,5467	AKR1B1,CYP3A4,PPARD	3/325
14_Member	GO Molecular Functions	GO:0016491	oxidoreductase activity	-2.37494	-0.490046	231,240,1576,4353	AKR1B1,ALOX5,CYP3A4,MPO	4/726
14_Member	GO Biological Processes	GO:0044282	small molecule catabolic process	-2.37437	-0.490046	1576,5467,7157	CYP3A4,PPARD,TP53	3/356
15_Summary	GO Biological Processes	GO:0009651	response to salt stress	-6.10004	-3.50919	231,3320,7157,5467,4313,5468,7421	AKR1B1,HSP90AA1,TP53,PPARD,MMP2,PPARG,VDR	7/-
15_Member	GO Biological Processes	GO:0009651	response to salt stress	-6.10004	-3.50919	231,3320,7157	AKR1B1,HSP90AA1,TP53	3/20
15_Member	GO Biological Processes	GO:0006970	response to osmotic stress	-4.3774	-2.12059	231,3320,7157	AKR1B1,HSP90AA1,TP53	3/73
15_Member	GO Biological Processes	GO:0019318	hexose metabolic process	-3.37642	-1.33932	231,5467,7157	AKR1B1,PPARD,TP53	3/159
15_Member	GO Biological Processes	GO:0005996	monosaccharide metabolic process	-3.21246	-1.20618	231,5467,7157	AKR1B1,PPARD,TP53	3/181
15_Member	GO Biological Processes	GO:0071695	anatomical structure maturation	-2.87452	-0.908011	231,4313,5468	AKR1B1,MMP2,PPARG	3/237
15_Member	GO Biological Processes	GO:0043065	positive regulation of apoptotic process	-2.80425	-0.843128	4313,5468,7157,7421	MMP2,PPARG,TP53,VDR	4/552
15_Member	GO Biological Processes	GO:0043068	positive regulation of programmed cell death	-2.75052	-0.796496	4313,5468,7157,7421	MMP2,PPARG,TP53,VDR	4/571
15_Member	GO Biological Processes	GO:0021700	developmental maturation	-2.64183	-0.708401	231,4313,5468	AKR1B1,MMP2,PPARG	3/286
15_Member	GO Biological Processes	GO:0071214	cellular response to abiotic stimulus	-2.50407	-0.593511	231,4313,7157	AKR1B1,MMP2,TP53	3/320
15_Member	GO Biological Processes	GO:0104004	cellular response to environmental stimulus	-2.50407	-0.593511	231,4313,7157	AKR1B1,MMP2,TP53	3/320
15_Member	GO Biological Processes	GO:0005975	carbohydrate metabolic process	-2.112	-0.264959	231,5467,7157	AKR1B1,PPARD,TP53	3/443
16_Summary	KEGG Pathway	hsa05216	Thyroid cancer	-5.27109	-2.79359	5468,6256,7157,4353,196,3309,9971,23435,7068,3320,150	PPARG,RXRA,TP53,MPO,AHR,HSPA5,NR1H4,TARDBP,THRB,HSP90AA1,ADRA2A	11/-
16_Member	KEGG Pathway	hsa05216	Thyroid cancer	-5.27109	-2.79359	5468,6256,7157	PPARG,RXRA,TP53	3/37
16_Member	KEGG Pathway	hsa05202	Transcriptional misregulation in cancer	-4.53991	-2.26507	4353,5468,6256,7157	MPO,PPARG,RXRA,TP53	4/193
16_Member	GO Biological Processes	GO:0071216	cellular response to biotic stimulus	-4.12322	-1.91951	196,3309,7157,9971	AHR,HSPA5,TP53,NR1H4	4/247
16_Member	GO Biological Processes	GO:0042752	regulation of circadian rhythm	-3.80111	-1.66657	5468,7157,23435	PPARG,TP53,TARDBP	3/114
16_Member	KEGG Pathway	hsa04919	Thyroid hormone signaling pathway	-3.71413	-1.59272	6256,7068,7157	RXRA,THRB,TP53	3/122
16_Member	GO Biological Processes	GO:0030512	negative regulation of transforming growth factor beta receptor signaling pathway	-3.64273	-1.54152	3309,5468,7157	HSPA5,PPARG,TP53	3/129
16_Member	GO Biological Processes	GO:0017015	regulation of transforming growth factor beta receptor signaling pathway	-3.23355	-1.21927	3309,5468,7157	HSPA5,PPARG,TP53	3/178
16_Member	GO Biological Processes	GO:1903844	regulation of cellular response to transforming growth factor beta stimulus	-3.21246	-1.20618	3309,5468,7157	HSPA5,PPARG,TP53	3/181
16_Member	GO Biological Processes	GO:0090101	negative regulation of transmembrane receptor protein serine/threonine kinase signaling pathway	-3.08054	-1.09365	3309,5468,7157	HSPA5,PPARG,TP53	3/201
16_Member	GO Molecular Functions	GO:0003682	chromatin binding	-2.58805	-0.666973	4353,5468,7068,7157	MPO,PPARG,THRB,TP53	4/633
16_Member	GO Biological Processes	GO:0090092	regulation of transmembrane receptor protein serine/threonine kinase signaling pathway	-2.50026	-0.591288	3309,5468,7157	HSPA5,PPARG,TP53	3/321
16_Member	GO Biological Processes	GO:0031647	regulation of protein stability	-2.46284	-0.561721	3320,7157,23435	HSP90AA1,TP53,TARDBP	3/331
16_Member	GO Biological Processes	GO:0051129	negative regulation of cellular component organization	-2.3985	-0.50509	3309,5468,7157,9971	HSPA5,PPARG,TP53,NR1H4	4/715
16_Member	GO Biological Processes	GO:0009895	negative regulation of catabolic process	-2.37437	-0.490046	150,7157,23435	ADRA2A,TP53,TARDBP	3/356
16_Member	KEGG Pathway	hsa05014	Amyotrophic lateral sclerosis	-2.32446	-0.454853	3309,7157,23435	HSPA5,TP53,TARDBP	3/371
16_Member	GO Biological Processes	GO:0090287	regulation of cellular response to growth factor stimulus	-2.31474	-0.446577	3309,5468,7157	HSPA5,PPARG,TP53	3/374
16_Member	GO Biological Processes	GO:0045936	negative regulation of phosphate metabolic process	-2.31151	-0.444796	5468,7157,23435	PPARG,TP53,TARDBP	3/375
16_Member	GO Biological Processes	GO:0010563	negative regulation of phosphorus metabolic process	-2.3083	-0.44302	5468,7157,23435	PPARG,TP53,TARDBP	3/376
17_Summary	GO Biological Processes	GO:0001501	skeletal system development	-5.25886	-2.7872	2778,4313,4322,7157,7421,9507,3320,6532	GNAS,MMP2,MMP13,TP53,VDR,ADAMTS4,HSP90AA1,SLC6A4	8/-
17_Member	GO Biological Processes	GO:0001501	skeletal system development	-5.25886	-2.7872	2778,4313,4322,7157,7421,9507	GNAS,MMP2,MMP13,TP53,VDR,ADAMTS4	6/502
17_Member	KEGG Pathway	hsa01522	Endocrine resistance	-3.98266	-1.80912	2778,4313,7157	GNAS,MMP2,TP53	3/99
17_Member	KEGG Pathway	hsa04926	Relaxin signaling pathway	-3.63286	-1.53655	2778,4313,4322	GNAS,MMP2,MMP13	3/130
17_Member	KEGG Pathway	hsa04915	Estrogen signaling pathway	-3.5474	-1.46785	2778,3320,4313	GNAS,HSP90AA1,MMP2	3/139
17_Member	GO Biological Processes	GO:0060348	bone development	-3.10579	-1.11509	2778,4322,7157	GNAS,MMP13,TP53	3/197
17_Member	GO Biological Processes	GO:0045926	negative regulation of growth	-2.90109	-0.929111	2778,6532,7157	GNAS,SLC6A4,TP53	3/232
17_Member	GO Biological Processes	GO:0040007	growth	-2.14466	-0.294864	2778,4322,7157	GNAS,MMP13,TP53	3/431
17_Member	GO Biological Processes	GO:0048589	developmental growth	-2.14466	-0.294864	2778,4322,7157	GNAS,MMP13,TP53	3/431
18_Summary	GO Molecular Functions	GO:0001223	transcription coactivator binding	-5.04137	-2.63913	196,5467,7068	AHR,PPARD,THRB	3/-
18_Member	GO Molecular Functions	GO:0001223	transcription coactivator binding	-5.04137	-2.63913	196,5467,7068	AHR,PPARD,THRB	3/44
19_Summary	GO Biological Processes	GO:0009636	response to toxic substance	-4.12322	-1.91951	196,4353,4780,6532,9971,11096	AHR,MPO,NFE2L2,SLC6A4,NR1H4,ADAMTS5	6/-
19_Member	GO Biological Processes	GO:0009636	response to toxic substance	-4.12322	-1.91951	196,4353,4780,6532	AHR,MPO,NFE2L2,SLC6A4	4/247
19_Member	GO Biological Processes	GO:0042742	defense response to bacterium	-2.52332	-0.60796	4353,9971,11096	MPO,NR1H4,ADAMTS5	3/315
19_Member	GO Biological Processes	GO:0009617	response to bacterium	-2.40282	-0.506996	196,4353,9971,11096	AHR,MPO,NR1H4,ADAMTS5	4/713
19_Member	GO Biological Processes	GO:0002237	response to molecule of bacterial origin	-2.3812	-0.490841	196,4353,9971	AHR,MPO,NR1H4	3/354
20_Summary	KEGG Pathway	hsa04659	Th17 cell differentiation	-3.87059	-1.72526	196,3320,6256,2740,3309,7157,7068	AHR,HSP90AA1,RXRA,GLP1R,HSPA5,TP53,THRB	7/-
20_Member	KEGG Pathway	hsa04659	Th17 cell differentiation	-3.87059	-1.72526	196,3320,6256	AHR,HSP90AA1,RXRA	3/108
20_Member	GO Biological Processes	GO:0072594	establishment of protein localization to organelle	-3.5242	-1.44699	2740,3309,3320,7157	GLP1R,HSPA5,HSP90AA1,TP53	4/354
20_Member	GO Biological Processes	GO:0008016	regulation of heart contraction	-3.04363	-1.0624	2740,3320,7068	GLP1R,HSP90AA1,THRB	3/207
20_Member	GO Biological Processes	GO:0090150	establishment of protein localization to membrane	-2.87979	-0.911462	2740,3309,3320	GLP1R,HSPA5,HSP90AA1	3/236
20_Member	GO Biological Processes	GO:0006886	intracellular protein transport	-2.78706	-0.827729	2740,3309,3320,7157	GLP1R,HSPA5,HSP90AA1,TP53	4/558
20_Member	GO Biological Processes	GO:0006605	protein targeting	-2.77389	-0.81633	2740,3309,3320	GLP1R,HSPA5,HSP90AA1	3/257
20_Member	KEGG Pathway	hsa04151	PI3K-Akt signaling pathway	-2.35414	-0.477235	3320,6256,7157	HSP90AA1,RXRA,TP53	3/362
20_Member	GO Biological Processes	GO:0033365	protein localization to organelle	-2.29658	-0.433121	2740,3309,3320,7157	GLP1R,HSPA5,HSP90AA1,TP53	4/764
20_Member	GO Biological Processes	GO:0043254	regulation of protein-containing complex assembly	-2.16982	-0.314456	3309,3320,7157	HSPA5,HSP90AA1,TP53	3/422
20_Member	GO Biological Processes	GO:0072657	protein localization to membrane	-2.04445	-0.202878	2740,3309,3320	GLP1R,HSPA5,HSP90AA1	3/469

## Sheet: Annotation-PP and Brain injury
MyList	Gene ID	Type	Tax ID	Homologene Gene ID	Homologene Gene Tax ID	GO:0004879 nuclear receptor activity	GO:0009410 response to xenobiotic stimulu	GO:0071407 cellular response to organic c	GO:0031667 response to nutrient levels	GO:0044703 multi-organism reproductive pr	GO:0071417 cellular response to organonit	GO:0048511 rhythmic process	GO:0010817 regulation of hormone levels	hsa05207 Chemical carcinogenesis - rece	hsa05417 Lipid and atherosclerosis	GO:0022617 extracellular matrix disassemb	GO:1901338 catecholamine binding	GO:0042220 response to cocaine	GO:1901615 organic hydroxy compound metab	GO:0009651 response to salt stress	hsa05216 Thyroid cancer	GO:0001501 skeletal system development	GO:0001223 transcription coactivator bind	GO:0009636 response to toxic substance	hsa04659 Th17 cell differentiation
TARDBP	23435	symbol	H. sapiens	23435	H. sapiens	1	0	0	0	0	0	1	1	0	1	0	0	0	0	0	1	0	0	0	0
HSPA5	3309	symbol	H. sapiens	3309	H. sapiens	0	0	0	1	1	1	0	0	0	1	0	1	0	0	0	1	0	0	0	1
RXRA	6256	symbol	H. sapiens	6256	H. sapiens	1	0	1	1	0	0	1	0	1	1	0	0	0	0	0	1	0	0	0	1
PPARD	5467	symbol	H. sapiens	5467	H. sapiens	1	1	1	1	1	0	0	0	0	0	0	1	0	1	1	0	0	1	0	0
AHR	196	symbol	H. sapiens	196	H. sapiens	1	1	1	1	0	1	1	0	1	0	0	1	0	0	0	1	0	1	1	1
VDR	7421	symbol	H. sapiens	7421	H. sapiens	1	0	1	1	1	1	0	0	1	0	0	0	1	0	1	0	1	0	0	0
PPARG	5468	symbol	H. sapiens	5468	H. sapiens	1	0	0	1	1	1	1	1	0	1	0	0	0	1	1	1	0	0	0	0
GNAS	2778	symbol	H. sapiens	2778	H. sapiens	1	0	1	1	1	1	0	0	1	1	0	1	1	0	0	0	1	0	0	0
TP53	7157	symbol	H. sapiens	7157	H. sapiens	1	1	0	1	1	1	1	0	0	1	1	1	1	1	1	1	1	0	0	1
NR1H4	9971	symbol	H. sapiens	9971	H. sapiens	1	0	1	1	1	1	0	1	1	0	0	0	0	1	0	1	0	0	1	0
GLP1R	2740	symbol	H. sapiens	2740	H. sapiens	1	0	0	0	1	1	0	1	0	0	0	0	1	0	0	0	0	0	0	1
TDP1	55775	symbol	H. sapiens	55775	H. sapiens	0	0	0	0	1	0	0	0	0	0	0	0	0	0	0	0	0	0	0	0
CYP3A4	1576	symbol	H. sapiens	1576	H. sapiens	0	1	0	0	0	0	0	1	1	0	0	0	0	1	0	0	0	0	0	0
THRB	7068	symbol	H. sapiens	7068	H. sapiens	1	0	0	0	1	0	0	0	0	0	0	0	1	0	0	1	0	1	0	1
HSP90AA1	3320	symbol	H. sapiens	3320	H. sapiens	1	1	0	1	1	1	0	1	1	1	1	1	1	0	1	1	1	0	0	1
NFE2L2	4780	symbol	H. sapiens	4780	H. sapiens	1	1	0	1	1	1	0	0	0	1	0	0	0	1	0	0	0	0	1	0
DRD3	1814	symbol	H. sapiens	1814	H. sapiens	0	1	1	1	1	1	1	1	0	0	0	0	1	1	0	0	0	0	0	0
MPO	4353	symbol	H. sapiens	4353	H. sapiens	0	1	0	1	0	0	0	0	0	1	0	0	0	1	0	1	0	0	1	0
ALOX5	240	symbol	H. sapiens	240	H. sapiens	1	0	0	1	0	1	0	1	0	1	0	0	0	1	0	0	0	0	0	0
ADAMTS5	11096	symbol	H. sapiens	11096	H. sapiens	0	0	0	0	0	0	0	0	0	0	1	0	0	0	0	0	0	0	1	0
ADAMTS4	9507	symbol	H. sapiens	9507	H. sapiens	0	0	0	0	0	0	0	0	0	0	1	1	0	0	0	0	1	0	0	0
MMP13	4322	symbol	H. sapiens	4322	H. sapiens	1	0	0	0	0	0	0	0	0	0	1	0	0	0	0	0	1	0	0	0
MMP2	4313	symbol	H. sapiens	4313	H. sapiens	1	1	1	1	1	0	1	0	0	1	1	1	0	0	1	0	1	0	0	0
ADRA2A	150	symbol	H. sapiens	150	H. sapiens	1	0	0	1	1	1	1	1	0	1	0	1	1	0	0	1	0	0	0	0
ADRA2B	151	symbol	H. sapiens	151	H. sapiens	0	0	0	0	1	0	0	1	0	0	0	1	0	0	0	0	0	0	0	0
AKR1B1	231	symbol	H. sapiens	231	H. sapiens	0	0	0	0	1	0	0	1	0	1	0	0	0	1	1	0	0	0	0	0
SLC6A4	6532	symbol	H. sapiens	6532	H. sapiens	1	1	1	1	1	1	1	1	0	0	0	1	1	0	0	0	1	0	1	0
SLC6A3	6531	symbol	H. sapiens	6531	H. sapiens	0	1	0	1	1	0	0	0	0	1	0	1	1	1	0	0	0	0	0	0

## Sheet: Enrichment-PP and Liver injury
GroupID	Category	Term	Description	LogP	Log(q-value)	Genes	Symbols	InTerm_InList
1_Summary	GO Molecular Functions	GO:0004879	nuclear receptor activity	-11.2632	-7.17198	196,5467,5468,6256,7421,9971,4780,7157,240,6531,150,6532,4353,23435,4313	AHR,PPARD,PPARG,RXRA,VDR,NR1H4,NFE2L2,TP53,ALOX5,SLC6A3,ADRA2A,SLC6A4,MPO,TARDBP,MMP2	15/-
1_Member	GO Molecular Functions	GO:0004879	nuclear receptor activity	-11.2632	-7.17198	196,5467,5468,6256,7421,9971	AHR,PPARD,PPARG,RXRA,VDR,NR1H4	6/59
1_Member	GO Molecular Functions	GO:0098531	ligand-activated transcription factor activity	-11.2177	-7.17198	196,5467,5468,6256,7421,9971	AHR,PPARD,PPARG,RXRA,VDR,NR1H4	6/60
1_Member	GO Molecular Functions	GO:0001221	transcription coregulator binding	-9.50313	-6.0595	196,4780,5467,5468,6256,9971	AHR,NFE2L2,PPARD,PPARG,RXRA,NR1H4	6/114
1_Member	GO Molecular Functions	GO:0140297	DNA-binding transcription factor binding	-8.67524	-5.36991	196,4780,5467,5468,6256,7157,7421,9971	AHR,NFE2L2,PPARD,PPARG,RXRA,TP53,VDR,NR1H4	8/478
1_Member	GO Molecular Functions	GO:0033293	monocarboxylic acid binding	-8.36599	-5.19536	5467,5468,6256,7421,9971	PPARD,PPARG,RXRA,VDR,NR1H4	5/79
1_Member	GO Biological Processes	GO:0030522	intracellular receptor signaling pathway	-8.22072	-5.15275	196,5467,5468,6256,7421,9971	AHR,PPARD,PPARG,RXRA,VDR,NR1H4	6/186
1_Member	GO Molecular Functions	GO:0061629	RNA polymerase II-specific DNA-binding transcription factor binding	-8.18584	-5.14015	196,4780,5468,6256,7157,7421,9971	AHR,NFE2L2,PPARG,RXRA,TP53,VDR,NR1H4	7/343
1_Member	GO Molecular Functions	GO:0008134	transcription factor binding	-7.9054	-4.9011	196,4780,5467,5468,6256,7157,7421,9971	AHR,NFE2L2,PPARD,PPARG,RXRA,TP53,VDR,NR1H4	8/600
1_Member	GO Biological Processes	GO:0009299	mRNA transcription	-7.16947	-4.25411	5468,6256,7157,7421	PPARG,RXRA,TP53,VDR	4/50
1_Member	GO Cellular Components	GO:0005667	transcription regulator complex	-6.94413	-4.07452	196,4780,5468,6256,7157,7421,9971	AHR,NFE2L2,PPARG,RXRA,TP53,VDR,NR1H4	7/521
1_Member	GO Molecular Functions	GO:0046965	nuclear retinoid X receptor binding	-6.53216	-3.72951	5468,7421,9971	PPARG,VDR,NR1H4	3/17
1_Member	GO Molecular Functions	GO:0031406	carboxylic acid binding	-6.50996	-3.71954	5467,5468,6256,7421,9971	PPARD,PPARG,RXRA,VDR,NR1H4	5/185
1_Member	GO Molecular Functions	GO:0043177	organic acid binding	-6.37477	-3.60783	5467,5468,6256,7421,9971	PPARD,PPARG,RXRA,VDR,NR1H4	5/197
1_Member	GO Biological Processes	GO:0050728	negative regulation of inflammatory response	-6.32092	-3.5745	196,240,5467,5468,9971	AHR,ALOX5,PPARD,PPARG,NR1H4	5/202
1_Member	GO Biological Processes	GO:0141193	nuclear receptor-mediated signaling pathway	-6.19274	-3.46927	5468,6256,7421,9971	PPARG,RXRA,VDR,NR1H4	4/87
1_Member	GO Biological Processes	GO:0032102	negative regulation of response to external stimulus	-6.07104	-3.38121	196,240,5467,5468,6531,9971	AHR,ALOX5,PPARD,PPARG,SLC6A3,NR1H4	6/430
1_Member	GO Molecular Functions	GO:0042974	nuclear retinoic acid receptor binding	-6.00475	-3.34822	5468,7421,9971	PPARG,VDR,NR1H4	3/25
1_Member	GO Cellular Components	GO:0090575	RNA polymerase II transcription regulator complex	-5.80586	-3.17514	4780,5468,6256,7421,9971	NFE2L2,PPARG,RXRA,VDR,NR1H4	5/257
1_Member	GO Biological Processes	GO:0032107	regulation of response to nutrient levels	-5.75908	-3.15271	6256,7421,9971	RXRA,VDR,NR1H4	3/30
1_Member	GO Biological Processes	GO:0031348	negative regulation of defense response	-5.52006	-2.98366	196,240,5467,5468,9971	AHR,ALOX5,PPARD,PPARG,NR1H4	5/294
1_Member	GO Cellular Components	GO:0043235	receptor complex	-5.48506	-2.95811	150,196,5468,6256,7421,9971	ADRA2A,AHR,PPARG,RXRA,VDR,NR1H4	6/543
1_Member	KEGG Pathway	hsa05216	Thyroid cancer	-5.47876	-2.95811	5468,6256,7157	PPARG,RXRA,TP53	3/37
1_Member	GO Molecular Functions	GO:0016922	nuclear receptor binding	-5.41686	-2.90265	5468,6256,7421,9971	PPARG,RXRA,VDR,NR1H4	4/136
1_Member	GO Biological Processes	GO:0009755	hormone-mediated signaling pathway	-5.34242	-2.85303	5467,5468,6256,7421	PPARD,PPARG,RXRA,VDR	4/142
1_Member	GO Biological Processes	GO:0042789	mRNA transcription by RNA polymerase II	-5.18994	-2.76229	5468,6256,7421	PPARG,RXRA,VDR	3/46
1_Member	KEGG Pathway	hsa04148	Efferocytosis	-5.18061	-2.75816	240,5467,5468,6256	ALOX5,PPARD,PPARG,RXRA	4/156
1_Member	GO Biological Processes	GO:0007584	response to nutrient	-5.13712	-2.7249	5468,6532,7421,9971	PPARG,SLC6A4,VDR,NR1H4	4/160
1_Member	GO Biological Processes	GO:0050680	negative regulation of epithelial cell proliferation	-5.00316	-2.61068	240,5467,5468,7421	ALOX5,PPARD,PPARG,VDR	4/173
1_Member	GO Biological Processes	GO:0006366	transcription by RNA polymerase II	-4.82518	-2.46523	5468,6256,7157,7421,9971	PPARG,RXRA,TP53,VDR,NR1H4	5/409
1_Member	KEGG Pathway	hsa05202	Transcriptional misregulation in cancer	-4.81612	-2.46503	4353,5468,6256,7157	MPO,PPARG,RXRA,TP53	4/193
1_Member	GO Biological Processes	GO:0050727	regulation of inflammatory response	-4.70624	-2.37235	196,240,5467,5468,9971	AHR,ALOX5,PPARD,PPARG,NR1H4	5/433
1_Member	GO Biological Processes	GO:0008285	negative regulation of cell population proliferation	-4.55647	-2.24717	240,5467,5468,6532,7157,7421	ALOX5,PPARD,PPARG,SLC6A4,TP53,VDR	6/791
1_Member	KEGG Pathway	hsa03320	PPAR signaling pathway	-4.53102	-2.23737	5467,5468,6256	PPARD,PPARG,RXRA	3/76
1_Member	GO Biological Processes	GO:0006351	DNA-templated transcription	-4.22641	-1.98689	5468,6256,7157,7421,9971	PPARG,RXRA,TP53,VDR,NR1H4	5/546
1_Member	GO Biological Processes	GO:0019216	regulation of lipid metabolic process	-3.92531	-1.74885	150,5467,5468,9971	ADRA2A,PPARD,PPARG,NR1H4	4/327
1_Member	GO Biological Processes	GO:0016071	mRNA metabolic process	-3.90495	-1.73522	5468,6256,7157,7421,23435	PPARG,RXRA,TP53,VDR,TARDBP	5/639
1_Member	GO Biological Processes	GO:0045834	positive regulation of lipid metabolic process	-3.89726	-1.73522	5467,5468,9971	PPARD,PPARG,NR1H4	3/124
1_Member	GO Biological Processes	GO:0010565	regulation of cellular ketone metabolic process	-3.71438	-1.59554	5467,5468,9971	PPARD,PPARG,NR1H4	3/143
1_Member	GO Biological Processes	GO:0062013	positive regulation of small molecule metabolic process	-3.70546	-1.59173	5467,5468,9971	PPARD,PPARG,NR1H4	3/144
1_Member	GO Biological Processes	GO:0045598	regulation of fat cell differentiation	-3.67909	-1.5754	240,5467,5468	ALOX5,PPARD,PPARG	3/147
1_Member	GO Biological Processes	GO:0001890	placenta development	-3.66181	-1.56306	5467,5468,7421	PPARD,PPARG,VDR	3/149
1_Member	GO Biological Processes	GO:0050678	regulation of epithelial cell proliferation	-3.55786	-1.47121	240,5467,5468,7421	ALOX5,PPARD,PPARG,VDR	4/408
1_Member	GO Biological Processes	GO:1905952	regulation of lipid localization	-3.39312	-1.33419	5467,5468,6256	PPARD,PPARG,RXRA	3/184
1_Member	GO Biological Processes	GO:0043065	positive regulation of apoptotic process	-3.06414	-1.04985	4313,5468,7157,7421	MMP2,PPARG,TP53,VDR	4/552
1_Member	GO Biological Processes	GO:0032409	regulation of transporter activity	-3.01174	-1.01137	150,5468,6256	ADRA2A,PPARG,RXRA	3/249
1_Member	GO Biological Processes	GO:0043068	positive regulation of programmed cell death	-3.00956	-1.01114	4313,5468,7157,7421	MMP2,PPARG,TP53,VDR	4/571
2_Summary	GO Biological Processes	GO:0031667	response to nutrient levels	-10.1347	-6.2651	3309,4353,4780,5467,5468,6532,7157,7421,9971,196,2740,2778,4313,3320	HSPA5,MPO,NFE2L2,PPARD,PPARG,SLC6A4,TP53,VDR,NR1H4,AHR,GLP1R,GNAS,MMP2,HSP90AA1	14/-
2_Member	GO Biological Processes	GO:0031667	response to nutrient levels	-10.1347	-6.2651	3309,4353,4780,5467,5468,6532,7157,7421,9971	HSPA5,MPO,NFE2L2,PPARD,PPARG,SLC6A4,TP53,VDR,NR1H4	9/490
2_Member	GO Biological Processes	GO:0071417	cellular response to organonitrogen compound	-8.47511	-5.20873	196,2740,2778,4780,5468,6532,7157,9971	AHR,GLP1R,GNAS,NFE2L2,PPARG,SLC6A4,TP53,NR1H4	8/507
2_Member	GO Biological Processes	GO:1901699	cellular response to nitrogen compound	-8.00814	-4.98363	196,2740,2778,4780,5468,6532,7157,9971	AHR,GLP1R,GNAS,NFE2L2,PPARG,SLC6A4,TP53,NR1H4	8/582
2_Member	GO Biological Processes	GO:0031669	cellular response to nutrient levels	-7.61483	-4.66604	3309,4780,5467,7157,7421,9971	HSPA5,NFE2L2,PPARD,TP53,VDR,NR1H4	6/235
2_Member	GO Biological Processes	GO:0001666	response to hypoxia	-6.96983	-4.07452	4313,4780,5467,5468,6532,7157	MMP2,NFE2L2,PPARD,PPARG,SLC6A4,TP53	6/302
2_Member	GO Biological Processes	GO:0036293	response to decreased oxygen levels	-6.8539	-4.01232	4313,4780,5467,5468,6532,7157	MMP2,NFE2L2,PPARD,PPARG,SLC6A4,TP53	6/316
2_Member	GO Biological Processes	GO:0070482	response to oxygen levels	-6.65205	-3.83681	4313,4780,5467,5468,6532,7157	MMP2,NFE2L2,PPARD,PPARG,SLC6A4,TP53	6/342
2_Member	GO Biological Processes	GO:0071456	cellular response to hypoxia	-5.36687	-2.85913	4780,5467,5468,7157	NFE2L2,PPARD,PPARG,TP53	4/140
2_Member	GO Biological Processes	GO:0036294	cellular response to decreased oxygen levels	-5.28281	-2.81115	4780,5467,5468,7157	NFE2L2,PPARD,PPARG,TP53	4/147
2_Member	GO Biological Processes	GO:0071453	cellular response to oxygen levels	-5.1158	-2.70859	4780,5467,5468,7157	NFE2L2,PPARD,PPARG,TP53	4/162
2_Member	GO Biological Processes	GO:1902893	regulation of miRNA transcription	-4.54828	-2.24609	5467,5468,7157	PPARD,PPARG,TP53	3/75
2_Member	GO Biological Processes	GO:0034248	regulation of amide metabolic process	-4.44805	-2.15958	4780,7157,9971	NFE2L2,TP53,NR1H4	3/81
2_Member	GO Biological Processes	GO:0071216	cellular response to biotic stimulus	-4.39696	-2.12579	196,3309,7157,9971	AHR,HSPA5,TP53,NR1H4	4/247
2_Member	GO Biological Processes	GO:2000628	regulation of miRNA metabolic process	-4.31117	-2.05786	5467,5468,7157	PPARD,PPARG,TP53	3/90
2_Member	GO Biological Processes	GO:0010660	regulation of muscle cell apoptotic process	-4.28266	-2.03631	4780,5468,7157	NFE2L2,PPARG,TP53	3/92
2_Member	GO Biological Processes	GO:0002831	regulation of response to biotic stimulus	-4.23773	-1.99481	196,3320,4780,5468,9971	AHR,HSP90AA1,NFE2L2,PPARG,NR1H4	5/543
2_Member	GO Biological Processes	GO:0062012	regulation of small molecule metabolic process	-3.89998	-1.73522	5467,5468,7157,9971	PPARD,PPARG,TP53,NR1H4	4/332
2_Member	GO Biological Processes	GO:0030512	negative regulation of transforming growth factor beta receptor signaling pathway	-3.84647	-1.68726	3309,5468,7157	HSPA5,PPARG,TP53	3/129
2_Member	GO Biological Processes	GO:0045596	negative regulation of cell differentiation	-3.65518	-1.55887	4780,5467,5468,6532,7157	NFE2L2,PPARD,PPARG,SLC6A4,TP53	5/723
2_Member	GO Biological Processes	GO:0017015	regulation of transforming growth factor beta receptor signaling pathway	-3.4352	-1.36494	3309,5468,7157	HSPA5,PPARG,TP53	3/178
2_Member	GO Biological Processes	GO:1903844	regulation of cellular response to transforming growth factor beta stimulus	-3.41398	-1.35055	3309,5468,7157	HSPA5,PPARG,TP53	3/181
2_Member	GO Biological Processes	GO:0045088	regulation of innate immune response	-3.37859	-1.32633	3320,4780,5468,9971	HSP90AA1,NFE2L2,PPARG,NR1H4	4/455
2_Member	GO Molecular Functions	GO:0001228	DNA-binding transcription activator activity, RNA polymerase II-specific	-3.30821	-1.2674	4780,5468,7157,9971	NFE2L2,PPARG,TP53,NR1H4	4/475
2_Member	GO Molecular Functions	GO:0001216	DNA-binding transcription activator activity	-3.28771	-1.25062	4780,5468,7157,9971	NFE2L2,PPARG,TP53,NR1H4	4/481
2_Member	GO Biological Processes	GO:0090101	negative regulation of transmembrane receptor protein serine/threonine kinase signaling pathway	-3.28121	-1.24624	3309,5468,7157	HSPA5,PPARG,TP53	3/201
2_Member	GO Molecular Functions	GO:0001227	DNA-binding transcription repressor activity, RNA polymerase II-specific	-2.9386	-0.947906	5467,5468,7157	PPARD,PPARG,TP53	3/264
2_Member	GO Molecular Functions	GO:0001217	DNA-binding transcription repressor activity	-2.89679	-0.911793	5467,5468,7157	PPARD,PPARG,TP53	3/273
2_Member	GO Biological Processes	GO:0090092	regulation of transmembrane receptor protein serine/threonine kinase signaling pathway	-2.69584	-0.741814	3309,5468,7157	HSPA5,PPARG,TP53	3/321
2_Member	GO Biological Processes	GO:1902532	negative regulation of intracellular signal transduction	-2.6755	-0.726718	3309,4780,5468,9971	HSPA5,NFE2L2,PPARG,NR1H4	4/704
2_Member	GO Biological Processes	GO:0051129	negative regulation of cellular component organization	-2.65104	-0.709149	3309,5468,7157,9971	HSPA5,PPARG,TP53,NR1H4	4/715
2_Member	GO Biological Processes	GO:0090287	regulation of cellular response to growth factor stimulus	-2.50808	-0.595924	3309,5468,7157	HSPA5,PPARG,TP53	3/374
3_Summary	GO Biological Processes	GO:0044703	multi-organism reproductive process	-9.90715	-6.19055	150,151,2778,4313,5467,6532,7421,231,4780,6531,2740,5468,3320,7157,9971,3309,23435	ADRA2A,ADRA2B,GNAS,MMP2,PPARD,SLC6A4,VDR,AKR1B1,NFE2L2,SLC6A3,GLP1R,PPARG,HSP90AA1,TP53,NR1H4,HSPA5,TARDBP	17/-
3_Member	GO Biological Processes	GO:0044703	multi-organism reproductive process	-9.90715	-6.19055	150,151,2778,4313,5467,6532,7421	ADRA2A,ADRA2B,GNAS,MMP2,PPARD,SLC6A4,VDR	7/194
3_Member	GO Biological Processes	GO:0044706	multi-multicellular organism process	-9.78411	-6.19055	150,151,2778,4313,5467,6532,7421	ADRA2A,ADRA2B,GNAS,MMP2,PPARD,SLC6A4,VDR	7/202
3_Member	GO Biological Processes	GO:0050878	regulation of body fluid levels	-9.69246	-6.19055	150,151,231,2778,4780,6531,6532,7421	ADRA2A,ADRA2B,AKR1B1,GNAS,NFE2L2,SLC6A3,SLC6A4,VDR	8/355
3_Member	GO Biological Processes	GO:0007565	female pregnancy	-8.40933	-5.20873	150,151,2778,4313,5467,7421	ADRA2A,ADRA2B,GNAS,MMP2,PPARD,VDR	6/173
3_Member	GO Molecular Functions	GO:1901338	catecholamine binding	-6.9074	-4.05204	150,151,6531	ADRA2A,ADRA2B,SLC6A3	3/13
3_Member	GO Biological Processes	GO:0071880	adenylate cyclase-activating adrenergic receptor signaling pathway	-6.30844	-3.5745	150,151,2778	ADRA2A,ADRA2B,GNAS	3/20
3_Member	GO Biological Processes	GO:0008015	blood circulation	-6.13652	-3.43024	150,151,2740,4313,5468,6532	ADRA2A,ADRA2B,GLP1R,MMP2,PPARG,SLC6A4	6/419
3_Member	GO Biological Processes	GO:0009611	response to wounding	-6.06518	-3.38121	150,151,2778,4313,5467,6532	ADRA2A,ADRA2B,GNAS,MMP2,PPARD,SLC6A4	6/431
3_Member	GO Biological Processes	GO:0071875	adrenergic receptor signaling pathway	-6.00475	-3.34822	150,151,2778	ADRA2A,ADRA2B,GNAS	3/25
3_Member	GO Biological Processes	GO:0030168	platelet activation	-5.9498	-3.30205	150,151,2778,6532	ADRA2A,ADRA2B,GNAS,SLC6A4	4/100
3_Member	GO Biological Processes	GO:1903522	regulation of blood circulation	-5.78115	-3.16397	150,151,2740,3320,4313	ADRA2A,ADRA2B,GLP1R,HSP90AA1,MMP2	5/260
3_Member	GO Biological Processes	GO:0003013	circulatory system process	-5.64678	-3.08538	150,151,2740,4313,5468,6532	ADRA2A,ADRA2B,GLP1R,MMP2,PPARG,SLC6A4	6/509
3_Member	GO Biological Processes	GO:0044057	regulation of system process	-5.3597	-2.85913	150,151,2740,3320,4313,5468	ADRA2A,ADRA2B,GLP1R,HSP90AA1,MMP2,PPARG	6/571
3_Member	GO Biological Processes	GO:0042060	wound healing	-5.33416	-2.85076	150,151,2778,5467,6532	ADRA2A,ADRA2B,GNAS,PPARD,SLC6A4	5/321
3_Member	GO Biological Processes	GO:0007189	adenylate cyclase-activating G protein-coupled receptor signaling pathway	-5.22526	-2.77035	150,151,2740,2778	ADRA2A,ADRA2B,GLP1R,GNAS	4/152
3_Member	GO Biological Processes	GO:0035296	regulation of tube diameter	-5.21399	-2.77035	150,151,4313,6532	ADRA2A,ADRA2B,MMP2,SLC6A4	4/153
3_Member	GO Biological Processes	GO:0097746	blood vessel diameter maintenance	-5.21399	-2.77035	150,151,4313,6532	ADRA2A,ADRA2B,MMP2,SLC6A4	4/153
3_Member	GO Biological Processes	GO:0035150	regulation of tube size	-5.20279	-2.76455	150,151,4313,6532	ADRA2A,ADRA2B,MMP2,SLC6A4	4/154
3_Member	GO Biological Processes	GO:0007596	blood coagulation	-4.98347	-2.60025	150,151,2778,6532	ADRA2A,ADRA2B,GNAS,SLC6A4	4/175
3_Member	GO Biological Processes	GO:0050817	coagulation	-4.96402	-2.59042	150,151,2778,6532	ADRA2A,ADRA2B,GNAS,SLC6A4	4/177
3_Member	GO Biological Processes	GO:0007599	hemostasis	-4.92579	-2.56133	150,151,2778,6532	ADRA2A,ADRA2B,GNAS,SLC6A4	4/181
3_Member	GO Biological Processes	GO:0019229	regulation of vasoconstriction	-4.67619	-2.3465	150,151,4313	ADRA2A,ADRA2B,MMP2	3/68
3_Member	GO Biological Processes	GO:0007188	adenylate cyclase-modulating G protein-coupled receptor signaling pathway	-4.44561	-2.15958	150,151,2740,2778	ADRA2A,ADRA2B,GLP1R,GNAS	4/240
3_Member	GO Biological Processes	GO:0090066	regulation of anatomical structure size	-4.40363	-2.12579	150,151,3320,4313,6532	ADRA2A,ADRA2B,HSP90AA1,MMP2,SLC6A4	5/501
3_Member	GO Biological Processes	GO:0090257	regulation of muscle system process	-4.36308	-2.10272	150,151,3320,5468	ADRA2A,ADRA2B,HSP90AA1,PPARG	4/252
3_Member	GO Molecular Functions	GO:0042562	hormone binding	-4.28266	-2.03631	150,151,2740	ADRA2A,ADRA2B,GLP1R	3/92
3_Member	GO Biological Processes	GO:0003018	vascular process in circulatory system	-4.22189	-1.98576	150,151,4313,6532	ADRA2A,ADRA2B,MMP2,SLC6A4	4/274
3_Member	GO Biological Processes	GO:0010469	regulation of signaling receptor activity	-4.20081	-1.96803	150,151,5468	ADRA2A,ADRA2B,PPARG	3/98
3_Member	GO Biological Processes	GO:0010562	positive regulation of phosphorus metabolic process	-3.7406	-1.61399	150,151,3320,7157,9971	ADRA2A,ADRA2B,HSP90AA1,TP53,NR1H4	5/693
3_Member	GO Biological Processes	GO:0045937	positive regulation of phosphate metabolic process	-3.7406	-1.61399	150,151,3320,7157,9971	ADRA2A,ADRA2B,HSP90AA1,TP53,NR1H4	5/693
3_Member	GO Biological Processes	GO:0001775	cell activation	-3.6358	-1.54193	150,151,2778,6532,7157	ADRA2A,ADRA2B,GNAS,SLC6A4,TP53	5/730
3_Member	GO Biological Processes	GO:0031401	positive regulation of protein modification process	-3.5682	-1.47916	150,151,3309,3320,7157	ADRA2A,ADRA2B,HSPA5,HSP90AA1,TP53	5/755
3_Member	GO Biological Processes	GO:0006937	regulation of muscle contraction	-3.47878	-1.4039	150,151,3320	ADRA2A,ADRA2B,HSP90AA1	3/172
3_Member	GO Biological Processes	GO:0045859	regulation of protein kinase activity	-3.37859	-1.32633	150,151,3320,5468	ADRA2A,ADRA2B,HSP90AA1,PPARG	4/455
3_Member	GO Biological Processes	GO:0045732	positive regulation of protein catabolic process	-3.26248	-1.23173	150,3320,4780	ADRA2A,HSP90AA1,NFE2L2	3/204
3_Member	GO Biological Processes	GO:0043549	regulation of kinase activity	-3.17022	-1.14364	150,151,3320,5468	ADRA2A,ADRA2B,HSP90AA1,PPARG	4/517
3_Member	GO Biological Processes	GO:0045860	positive regulation of protein kinase activity	-3.02692	-1.02064	150,151,3320	ADRA2A,ADRA2B,HSP90AA1	3/246
3_Member	GO Biological Processes	GO:0001934	positive regulation of protein phosphorylation	-3.01521	-1.01288	150,151,3320,7157	ADRA2A,ADRA2B,HSP90AA1,TP53	4/569
3_Member	GO Biological Processes	GO:0042327	positive regulation of phosphorylation	-2.89299	-0.910997	150,151,3320,7157	ADRA2A,ADRA2B,HSP90AA1,TP53	4/614
3_Member	GO Cellular Components	GO:0150034	distal axon	-2.89223	-0.910997	150,3320,6531	ADRA2A,HSP90AA1,SLC6A3	3/274
3_Member	GO Biological Processes	GO:0009896	positive regulation of catabolic process	-2.86971	-0.903201	150,3320,4780,23435	ADRA2A,HSP90AA1,NFE2L2,TARDBP	4/623
3_Member	GO Biological Processes	GO:0051338	regulation of transferase activity	-2.86971	-0.903201	150,151,3320,5468	ADRA2A,ADRA2B,HSP90AA1,PPARG	4/623
3_Member	GO Biological Processes	GO:0033674	positive regulation of kinase activity	-2.81309	-0.853757	150,151,3320	ADRA2A,ADRA2B,HSP90AA1	3/292
3_Member	GO Biological Processes	GO:0042176	regulation of protein catabolic process	-2.54461	-0.624395	150,3320,4780	ADRA2A,HSP90AA1,NFE2L2	3/363
3_Member	GO Biological Processes	GO:0051347	positive regulation of transferase activity	-2.54124	-0.622649	150,151,3320	ADRA2A,ADRA2B,HSP90AA1	3/364
3_Member	KEGG Pathway	hsa04080	Neuroactive ligand-receptor interaction	-2.52786	-0.612498	150,151,2740	ADRA2A,ADRA2B,GLP1R	3/368
3_Member	GO Cellular Components	GO:0043025	neuronal cell body	-2.17646	-0.28762	150,3320,6531	ADRA2A,HSP90AA1,SLC6A3	3/492
3_Member	GO Biological Processes	GO:0001819	positive regulation of cytokine production	-2.14533	-0.258001	150,3320,9971	ADRA2A,HSP90AA1,NR1H4	3/505
3_Member	GO Cellular Components	GO:0044297	cell body	-2.02484	-0.143494	150,3320,6531	ADRA2A,HSP90AA1,SLC6A3	3/559
4_Summary	GO Biological Processes	GO:0009725	response to hormone	-9.69218	-6.19055	150,2740,2778,3320,4313,4780,5467,5468,6256,7421,7157	ADRA2A,GLP1R,GNAS,HSP90AA1,MMP2,NFE2L2,PPARD,PPARG,RXRA,VDR,TP53	11/-
4_Member	GO Biological Processes	GO:0009725	response to hormone	-9.69218	-6.19055	150,2740,2778,3320,4313,4780,5467,5468,6256,7421	ADRA2A,GLP1R,GNAS,HSP90AA1,MMP2,NFE2L2,PPARD,PPARG,RXRA,VDR	10/795
4_Member	GO Biological Processes	GO:0032870	cellular response to hormone stimulus	-8.42858	-5.20873	150,2740,2778,4780,5467,5468,6256,7421	ADRA2A,GLP1R,GNAS,NFE2L2,PPARD,PPARG,RXRA,VDR	8/514
4_Member	KEGG Pathway	hsa05200	Pathways in cancer	-8.30553	-5.17025	2778,3320,4313,4780,5467,5468,6256,7157	GNAS,HSP90AA1,MMP2,NFE2L2,PPARD,PPARG,RXRA,TP53	8/533
5_Summary	GO Biological Processes	GO:0009410	response to xenobiotic stimulus	-9.02006	-5.62758	196,1576,3320,4313,4780,6531,6532,7157,4353,5467	AHR,CYP3A4,HSP90AA1,MMP2,NFE2L2,SLC6A3,SLC6A4,TP53,MPO,PPARD	10/-
5_Member	GO Biological Processes	GO:0009410	response to xenobiotic stimulus	-9.02006	-5.62758	196,1576,3320,4313,4780,6531,6532,7157	AHR,CYP3A4,HSP90AA1,MMP2,NFE2L2,SLC6A3,SLC6A4,TP53	8/432
5_Member	GO Biological Processes	GO:0071466	cellular response to xenobiotic stimulus	-4.81612	-2.46503	196,1576,4780,7157	AHR,CYP3A4,NFE2L2,TP53	4/193
5_Member	GO Biological Processes	GO:0044248	cellular catabolic process	-4.55955	-2.24717	1576,3320,4353,4780,5467,7157	CYP3A4,HSP90AA1,MPO,NFE2L2,PPARD,TP53	6/790
6_Summary	GO Biological Processes	GO:0071407	cellular response to organic cyclic compound	-8.75447	-5.40775	196,2778,4313,5467,6256,6532,7421,9971	AHR,GNAS,MMP2,PPARD,RXRA,SLC6A4,VDR,NR1H4	8/-
6_Member	GO Biological Processes	GO:0071407	cellular response to organic cyclic compound	-8.75447	-5.40775	196,2778,4313,5467,6256,6532,7421,9971	AHR,GNAS,MMP2,PPARD,RXRA,SLC6A4,VDR,NR1H4	8/467
6_Member	GO Biological Processes	GO:0071396	cellular response to lipid	-8.28652	-5.17025	196,2778,4313,5467,6256,6532,7421,9971	AHR,GNAS,MMP2,PPARD,RXRA,SLC6A4,VDR,NR1H4	8/536
6_Member	GO Biological Processes	GO:0032526	response to retinoic acid	-4.09936	-1.88297	4313,6256,6532	MMP2,RXRA,SLC6A4	3/106
7_Summary	GO Biological Processes	GO:0010817	regulation of hormone levels	-8.25508	-5.16363	150,231,240,1576,2740,5468,9971,23435,151,6532,3320	ADRA2A,AKR1B1,ALOX5,CYP3A4,GLP1R,PPARG,NR1H4,TARDBP,ADRA2B,SLC6A4,HSP90AA1	11/-
7_Member	GO Biological Processes	GO:0010817	regulation of hormone levels	-8.25508	-5.16363	150,231,240,1576,2740,5468,9971,23435	ADRA2A,AKR1B1,ALOX5,CYP3A4,GLP1R,PPARG,NR1H4,TARDBP	8/541
7_Member	GO Biological Processes	GO:1903530	regulation of secretion by cell	-6.76879	-3.94058	150,151,240,5468,6532,9971,23435	ADRA2A,ADRA2B,ALOX5,PPARG,SLC6A4,NR1H4,TARDBP	7/553
7_Member	GO Biological Processes	GO:0051046	regulation of secretion	-6.49571	-3.71719	150,151,240,5468,6532,9971,23435	ADRA2A,ADRA2B,ALOX5,PPARG,SLC6A4,NR1H4,TARDBP	7/607
7_Member	GO Biological Processes	GO:0051223	regulation of protein transport	-6.02451	-3.34988	150,240,3320,5468,9971,23435	ADRA2A,ALOX5,HSP90AA1,PPARG,NR1H4,TARDBP	6/438
7_Member	GO Biological Processes	GO:0046883	regulation of hormone secretion	-5.8225	-3.18335	150,240,5468,9971,23435	ADRA2A,ALOX5,PPARG,NR1H4,TARDBP	5/255
7_Member	GO Biological Processes	GO:0050708	regulation of protein secretion	-5.73259	-3.13405	150,240,5468,9971,23435	ADRA2A,ALOX5,PPARG,NR1H4,TARDBP	5/266
7_Member	GO Biological Processes	GO:0070201	regulation of establishment of protein localization	-5.51747	-2.98366	150,240,3320,5468,9971,23435	ADRA2A,ALOX5,HSP90AA1,PPARG,NR1H4,TARDBP	6/536
7_Member	GO Biological Processes	GO:0050796	regulation of insulin secretion	-5.05341	-2.65117	150,240,9971,23435	ADRA2A,ALOX5,NR1H4,TARDBP	4/168
7_Member	GO Biological Processes	GO:0090276	regulation of peptide hormone secretion	-4.77249	-2.42576	150,240,9971,23435	ADRA2A,ALOX5,NR1H4,TARDBP	4/198
7_Member	GO Biological Processes	GO:0002791	regulation of peptide secretion	-4.74685	-2.40873	150,240,9971,23435	ADRA2A,ALOX5,NR1H4,TARDBP	4/201
7_Member	GO Biological Processes	GO:0090087	regulation of peptide transport	-4.74685	-2.40873	150,240,9971,23435	ADRA2A,ALOX5,NR1H4,TARDBP	4/201
7_Member	GO Biological Processes	GO:0042593	glucose homeostasis	-4.64017	-2.31463	150,240,5468,9971	ADRA2A,ALOX5,PPARG,NR1H4	4/214
7_Member	GO Biological Processes	GO:0033500	carbohydrate homeostasis	-4.63224	-2.31082	150,240,5468,9971	ADRA2A,ALOX5,PPARG,NR1H4	4/215
7_Member	GO Biological Processes	GO:0051222	positive regulation of protein transport	-4.36308	-2.10272	3320,5468,9971,23435	HSP90AA1,PPARG,NR1H4,TARDBP	4/252
7_Member	GO Biological Processes	GO:1903532	positive regulation of secretion by cell	-4.12066	-1.90105	5468,6532,9971,23435	PPARG,SLC6A4,NR1H4,TARDBP	4/291
7_Member	GO Biological Processes	GO:0051047	positive regulation of secretion	-3.99847	-1.80404	5468,6532,9971,23435	PPARG,SLC6A4,NR1H4,TARDBP	4/313
7_Member	GO Biological Processes	GO:1904951	positive regulation of establishment of protein localization	-3.92021	-1.74668	3320,5468,9971,23435	HSP90AA1,PPARG,NR1H4,TARDBP	4/328
7_Member	GO Biological Processes	GO:0046887	positive regulation of hormone secretion	-3.70546	-1.59173	5468,9971,23435	PPARG,NR1H4,TARDBP	3/144
7_Member	GO Biological Processes	GO:0050714	positive regulation of protein secretion	-3.67909	-1.5754	5468,9971,23435	PPARG,NR1H4,TARDBP	3/147
7_Member	GO Biological Processes	GO:1903829	positive regulation of protein localization	-3.2742	-1.24134	3320,5468,9971,23435	HSP90AA1,PPARG,NR1H4,TARDBP	4/485
8_Summary	KEGG Pathway	hsa05207	Chemical carcinogenesis - receptor activation	-7.84479	-4.86626	196,1576,2778,3320,6256,7421,7157	AHR,CYP3A4,GNAS,HSP90AA1,RXRA,VDR,TP53	7/-
8_Member	KEGG Pathway	hsa05207	Chemical carcinogenesis - receptor activation	-7.84479	-4.86626	196,1576,2778,3320,6256,7421	AHR,CYP3A4,GNAS,HSP90AA1,RXRA,VDR	6/215
8_Member	KEGG Pathway	hsa04659	Th17 cell differentiation	-4.07522	-1.86522	196,3320,6256	AHR,HSP90AA1,RXRA	3/108
8_Member	KEGG Pathway	hsa04151	PI3K-Akt signaling pathway	-2.54799	-0.625073	3320,6256,7157	HSP90AA1,RXRA,TP53	3/362
9_Summary	KEGG Pathway	hsa05417	Lipid and atherosclerosis	-7.83278	-4.86626	3309,3320,4780,5468,6256,7157,2778,6531,231,4313,4353,23435,240,150	HSPA5,HSP90AA1,NFE2L2,PPARG,RXRA,TP53,GNAS,SLC6A3,AKR1B1,MMP2,MPO,TARDBP,ALOX5,ADRA2A	14/-
9_Member	KEGG Pathway	hsa05417	Lipid and atherosclerosis	-7.83278	-4.86626	3309,3320,4780,5468,6256,7157	HSPA5,HSP90AA1,NFE2L2,PPARG,RXRA,TP53	6/216
9_Member	KEGG Pathway	hsa05012	Parkinson disease	-5.69298	-3.11711	2778,3309,4780,6531,7157	GNAS,HSPA5,NFE2L2,SLC6A3,TP53	5/271
9_Member	GO Biological Processes	GO:0006984	ER-nucleus signaling pathway	-5.6314	-3.07707	3309,4780,7157	HSPA5,NFE2L2,TP53	3/33
9_Member	GO Biological Processes	GO:0062197	cellular response to chemical stress	-5.60094	-3.05356	231,4313,4353,4780,7157	AKR1B1,MMP2,MPO,NFE2L2,TP53	5/283
9_Member	KEGG Pathway	hsa05418	Fluid shear stress and atherosclerosis	-5.3546	-2.85913	3320,4313,4780,7157	HSP90AA1,MMP2,NFE2L2,TP53	4/141
9_Member	GO Biological Processes	GO:0042149	cellular response to glucose starvation	-5.219	-2.77035	3309,4780,7157	HSPA5,NFE2L2,TP53	3/45
9_Member	GO Molecular Functions	GO:0019904	protein domain specific binding	-5.01936	-2.62203	3309,3320,4780,5468,6256,7157	HSPA5,HSP90AA1,NFE2L2,PPARG,RXRA,TP53	6/655
9_Member	GO Biological Processes	GO:0034599	cellular response to oxidative stress	-4.54749	-2.24609	4313,4353,4780,7157	MMP2,MPO,NFE2L2,TP53	4/226
9_Member	GO Biological Processes	GO:0034976	response to endoplasmic reticulum stress	-4.54	-2.24249	3309,4780,7157,23435	HSPA5,NFE2L2,TP53,TARDBP	4/227
9_Member	GO Biological Processes	GO:1905897	regulation of response to endoplasmic reticulum stress	-4.38538	-2.11783	240,3309,4780	ALOX5,HSPA5,NFE2L2	3/85
9_Member	GO Molecular Functions	GO:0031625	ubiquitin protein ligase binding	-4.04184	-1.83813	3309,3320,4780,7157	HSPA5,HSP90AA1,NFE2L2,TP53	4/305
9_Member	GO Molecular Functions	GO:0044389	ubiquitin-like protein ligase binding	-3.94071	-1.75834	3309,3320,4780,7157	HSPA5,HSP90AA1,NFE2L2,TP53	4/324
9_Member	GO Biological Processes	GO:0006986	response to unfolded protein	-3.92875	-1.74935	3309,3320,4780	HSPA5,HSP90AA1,NFE2L2	3/121
9_Member	GO Biological Processes	GO:0034614	cellular response to reactive oxygen species	-3.78813	-1.64006	4313,4353,4780	MMP2,MPO,NFE2L2	3/135
9_Member	GO Biological Processes	GO:0035966	response to topologically incorrect protein	-3.75996	-1.62542	3309,3320,4780	HSPA5,HSP90AA1,NFE2L2	3/138
9_Member	GO Biological Processes	GO:0006979	response to oxidative stress	-3.72863	-1.60462	4313,4353,4780,7157	MMP2,MPO,NFE2L2,TP53	4/368
9_Member	GO Biological Processes	GO:2000377	regulation of reactive oxygen species metabolic process	-3.67042	-1.56921	240,4780,7157	ALOX5,NFE2L2,TP53	3/148
9_Member	KEGG Pathway	hsa04141	Protein processing in endoplasmic reticulum	-3.49366	-1.41645	3309,3320,4780	HSPA5,HSP90AA1,NFE2L2	3/170
9_Member	GO Biological Processes	GO:0009267	cellular response to starvation	-3.4568	-1.38423	3309,4780,7157	HSPA5,NFE2L2,TP53	3/175
9_Member	GO Biological Processes	GO:0000302	response to reactive oxygen species	-3.40698	-1.34582	4313,4353,4780	MMP2,MPO,NFE2L2	3/182
9_Member	GO Biological Processes	GO:2001242	regulation of intrinsic apoptotic signaling pathway	-3.35912	-1.31343	4313,4780,7157	MMP2,NFE2L2,TP53	3/189
9_Member	GO Biological Processes	GO:0042594	response to starvation	-3.19036	-1.1617	3309,4780,7157	HSPA5,NFE2L2,TP53	3/216
9_Member	GO Biological Processes	GO:0080135	regulation of cellular response to stress	-3.14222	-1.11771	240,3309,4780,7157	ALOX5,HSPA5,NFE2L2,TP53	4/526
9_Member	GO Biological Processes	GO:0030335	positive regulation of cell migration	-2.94336	-0.950727	150,3309,4313,4780	ADRA2A,HSPA5,MMP2,NFE2L2	4/595
9_Member	GO Biological Processes	GO:2000147	positive regulation of cell motility	-2.86971	-0.903201	150,3309,4313,4780	ADRA2A,HSPA5,MMP2,NFE2L2	4/623
9_Member	GO Biological Processes	GO:0040017	positive regulation of locomotion	-2.83423	-0.873114	150,3309,4313,4780	ADRA2A,HSPA5,MMP2,NFE2L2	4/637
9_Member	GO Biological Processes	GO:0030163	protein catabolic process	-2.62916	-0.690675	3309,3320,4313,4780	HSPA5,HSP90AA1,MMP2,NFE2L2	4/725
9_Member	GO Biological Processes	GO:0071345	cellular response to cytokine stimulus	-2.60334	-0.669915	3309,4313,4780,7157	HSPA5,MMP2,NFE2L2,TP53	4/737
9_Member	GO Biological Processes	GO:2001233	regulation of apoptotic signaling pathway	-2.43836	-0.532543	4313,4780,7157	MMP2,NFE2L2,TP53	3/396
10_Summary	GO Biological Processes	GO:0048511	rhythmic process	-7.24767	-4.31592	196,4313,5468,6532,7157,23435,3320,150,3309	AHR,MMP2,PPARG,SLC6A4,TP53,TARDBP,HSP90AA1,ADRA2A,HSPA5	9/-
10_Member	GO Biological Processes	GO:0048511	rhythmic process	-7.24767	-4.31592	196,4313,5468,6532,7157,23435	AHR,MMP2,PPARG,SLC6A4,TP53,TARDBP	6/271
10_Member	GO Biological Processes	GO:0042752	regulation of circadian rhythm	-4.00549	-1.80798	5468,7157,23435	PPARG,TP53,TARDBP	3/114
10_Member	GO Biological Processes	GO:0031647	regulation of protein stability	-2.658	-0.714394	3320,7157,23435	HSP90AA1,TP53,TARDBP	3/331
10_Member	GO Molecular Functions	GO:0046982	protein heterodimerization activity	-2.58934	-0.657584	150,196,7157	ADRA2A,AHR,TP53	3/350
10_Member	GO Biological Processes	GO:0009895	negative regulation of catabolic process	-2.56848	-0.641706	150,7157,23435	ADRA2A,TP53,TARDBP	3/356
10_Member	KEGG Pathway	hsa05014	Amyotrophic lateral sclerosis	-2.51793	-0.604171	3309,7157,23435	HSPA5,TP53,TARDBP	3/371
10_Member	GO Biological Processes	GO:0045936	negative regulation of phosphate metabolic process	-2.50482	-0.594254	5468,7157,23435	PPARG,TP53,TARDBP	3/375
10_Member	GO Biological Processes	GO:0010563	negative regulation of phosphorus metabolic process	-2.50156	-0.592588	5468,7157,23435	PPARG,TP53,TARDBP	3/376
11_Summary	GO Biological Processes	GO:0032787	monocarboxylic acid metabolic process	-6.94413	-4.07452	231,240,1576,5467,5468,7157,9971,6531,4780,4353	AKR1B1,ALOX5,CYP3A4,PPARD,PPARG,TP53,NR1H4,SLC6A3,NFE2L2,MPO	10/-
11_Member	GO Biological Processes	GO:0032787	monocarboxylic acid metabolic process	-6.94413	-4.07452	231,240,1576,5467,5468,7157,9971	AKR1B1,ALOX5,CYP3A4,PPARD,PPARG,TP53,NR1H4	7/521
11_Member	GO Biological Processes	GO:1901615	organic hydroxy compound metabolic process	-5.7783	-3.16397	231,1576,5467,6531,7157,9971	AKR1B1,CYP3A4,PPARD,SLC6A3,TP53,NR1H4	6/483
11_Member	GO Biological Processes	GO:0019752	carboxylic acid metabolic process	-5.72342	-3.13257	231,240,1576,5467,5468,7157,9971	AKR1B1,ALOX5,CYP3A4,PPARD,PPARG,TP53,NR1H4	7/792
11_Member	GO Biological Processes	GO:0006631	fatty acid metabolic process	-5.31452	-2.83703	231,240,1576,5467,5468	AKR1B1,ALOX5,CYP3A4,PPARD,PPARG	5/324
11_Member	GO Biological Processes	GO:0019748	secondary metabolic process	-5.16152	-2.74421	231,1576,4780	AKR1B1,CYP3A4,NFE2L2	3/47
11_Member	GO Biological Processes	GO:0008202	steroid metabolic process	-4.31681	-2.05999	231,1576,5467,9971	AKR1B1,CYP3A4,PPARD,NR1H4	4/259
11_Member	GO Biological Processes	GO:0120254	olefinic compound metabolic process	-3.69661	-1.58793	231,240,1576	AKR1B1,ALOX5,CYP3A4	3/145
11_Member	GO Biological Processes	GO:0030258	lipid modification	-3.51632	-1.43205	240,1576,5467	ALOX5,CYP3A4,PPARD	3/167
11_Member	GO Biological Processes	GO:0044283	small molecule biosynthetic process	-3.35358	-1.31006	231,240,1576,4353	AKR1B1,ALOX5,CYP3A4,MPO	4/462
11_Member	GO Biological Processes	GO:0046394	carboxylic acid biosynthetic process	-2.90136	-0.914475	231,240,1576	AKR1B1,ALOX5,CYP3A4	3/272
11_Member	GO Biological Processes	GO:0016053	organic acid biosynthetic process	-2.88769	-0.910186	231,240,1576	AKR1B1,ALOX5,CYP3A4	3/275
11_Member	GO Biological Processes	GO:0006066	alcohol metabolic process	-2.68056	-0.730031	231,1576,5467	AKR1B1,CYP3A4,PPARD	3/325
11_Member	GO Molecular Functions	GO:0016491	oxidoreductase activity	-2.62699	-0.690198	231,240,1576,4353	AKR1B1,ALOX5,CYP3A4,MPO	4/726
11_Member	GO Biological Processes	GO:0044282	small molecule catabolic process	-2.56848	-0.641706	1576,5467,7157	CYP3A4,PPARD,TP53	3/356
12_Summary	GO Biological Processes	GO:0009651	response to salt stress	-6.30844	-3.5745	231,3320,7157,5467,4313,5468	AKR1B1,HSP90AA1,TP53,PPARD,MMP2,PPARG	6/-
12_Member	GO Biological Processes	GO:0009651	response to salt stress	-6.30844	-3.5745	231,3320,7157	AKR1B1,HSP90AA1,TP53	3/20
12_Member	GO Biological Processes	GO:0006970	response to osmotic stress	-4.58353	-2.26619	231,3320,7157	AKR1B1,HSP90AA1,TP53	3/73
12_Member	GO Biological Processes	GO:0019318	hexose metabolic process	-3.57887	-1.48742	231,5467,7157	AKR1B1,PPARD,TP53	3/159
12_Member	GO Biological Processes	GO:0005996	monosaccharide metabolic process	-3.41398	-1.35055	231,5467,7157	AKR1B1,PPARD,TP53	3/181
12_Member	GO Biological Processes	GO:0071695	anatomical structure maturation	-3.07366	-1.05735	231,4313,5468	AKR1B1,MMP2,PPARG	3/237
12_Member	GO Biological Processes	GO:0021700	developmental maturation	-2.83889	-0.875977	231,4313,5468	AKR1B1,MMP2,PPARG	3/286
12_Member	GO Biological Processes	GO:0071214	cellular response to abiotic stimulus	-2.69969	-0.743906	231,4313,7157	AKR1B1,MMP2,TP53	3/320
12_Member	GO Biological Processes	GO:0104004	cellular response to environmental stimulus	-2.69969	-0.743906	231,4313,7157	AKR1B1,MMP2,TP53	3/320
12_Member	GO Biological Processes	GO:0005975	carbohydrate metabolic process	-2.30244	-0.409034	231,5467,7157	AKR1B1,PPARD,TP53	3/443
13_Summary	KEGG Pathway	hsa04976	Bile secretion	-6.13351	-3.43024	1576,2778,6256,9971,7421	CYP3A4,GNAS,RXRA,NR1H4,VDR	5/-
13_Member	KEGG Pathway	hsa04976	Bile secretion	-6.13351	-3.43024	1576,2778,6256,9971	CYP3A4,GNAS,RXRA,NR1H4	4/90
13_Member	GO Molecular Functions	GO:0005496	steroid binding	-4.08723	-1.87405	1576,7421,9971	CYP3A4,VDR,NR1H4	3/107
14_Summary	KEGG Pathway	hsa04928	Parathyroid hormone synthesis, secretion and action	-5.70698	-3.12368	2778,4322,6256,7421,240	GNAS,MMP13,RXRA,VDR,ALOX5	5/-
14_Member	KEGG Pathway	hsa04928	Parathyroid hormone synthesis, secretion and action	-5.70698	-3.12368	2778,4322,6256,7421	GNAS,MMP13,RXRA,VDR	4/115
14_Member	GO Biological Processes	GO:0030501	positive regulation of bone mineralization	-5.24874	-2.78283	240,6256,7421	ALOX5,RXRA,VDR	3/44
14_Member	GO Biological Processes	GO:0045778	positive regulation of ossification	-4.97849	-2.60025	240,6256,7421	ALOX5,RXRA,VDR	3/54
14_Member	GO Biological Processes	GO:0070169	positive regulation of biomineral tissue development	-4.97849	-2.60025	240,6256,7421	ALOX5,RXRA,VDR	3/54
14_Member	GO Biological Processes	GO:0030500	regulation of bone mineralization	-4.43209	-2.14982	240,6256,7421	ALOX5,RXRA,VDR	3/82
14_Member	GO Biological Processes	GO:0070167	regulation of biomineral tissue development	-4.13645	-1.91358	240,6256,7421	ALOX5,RXRA,VDR	3/103
14_Member	GO Biological Processes	GO:0030278	regulation of ossification	-3.89726	-1.73522	240,6256,7421	ALOX5,RXRA,VDR	3/124
15_Summary	GO Biological Processes	GO:0001501	skeletal system development	-5.68148	-3.11291	2778,4313,4322,7157,7421,9507,3320	GNAS,MMP2,MMP13,TP53,VDR,ADAMTS4,HSP90AA1	7/-
15_Member	GO Biological Processes	GO:0001501	skeletal system development	-5.68148	-3.11291	2778,4313,4322,7157,7421,9507	GNAS,MMP2,MMP13,TP53,VDR,ADAMTS4	6/502
15_Member	GO Biological Processes	GO:0022617	extracellular matrix disassembly	-5.18994	-2.76229	4313,4322,9507	MMP2,MMP13,ADAMTS4	3/46
15_Member	KEGG Pathway	hsa01522	Endocrine resistance	-4.18768	-1.95822	2778,4313,7157	GNAS,MMP2,TP53	3/99
15_Member	GO Molecular Functions	GO:0004222	metalloendopeptidase activity	-4.05154	-1.8447	4313,4322,9507	MMP2,MMP13,ADAMTS4	3/110
15_Member	KEGG Pathway	hsa04926	Relaxin signaling pathway	-3.83655	-1.68295	2778,4313,4322	GNAS,MMP2,MMP13	3/130
15_Member	GO Biological Processes	GO:0022411	cellular component disassembly	-3.76513	-1.62542	4313,4322,7157,9507	MMP2,MMP13,TP53,ADAMTS4	4/360
15_Member	KEGG Pathway	hsa04915	Estrogen signaling pathway	-3.75071	-1.61883	2778,3320,4313	GNAS,HSP90AA1,MMP2	3/139
15_Member	GO Molecular Functions	GO:0008237	metallopeptidase activity	-3.38624	-1.32955	4313,4322,9507	MMP2,MMP13,ADAMTS4	3/185
15_Member	GO Biological Processes	GO:0060348	bone development	-3.30663	-1.2674	2778,4322,7157	GNAS,MMP13,TP53	3/197
15_Member	GO Cellular Components	GO:0031012	extracellular matrix	-3.03516	-1.0249	3320,4313,4322,9507	HSP90AA1,MMP2,MMP13,ADAMTS4	4/562
15_Member	GO Cellular Components	GO:0030312	external encapsulating structure	-3.0323	-1.02403	3320,4313,4322,9507	HSP90AA1,MMP2,MMP13,ADAMTS4	4/563
15_Member	GO Biological Processes	GO:0030198	extracellular matrix organization	-2.88769	-0.910186	4313,4322,9507	MMP2,MMP13,ADAMTS4	3/275
15_Member	GO Biological Processes	GO:0043062	extracellular structure organization	-2.88317	-0.908785	4313,4322,9507	MMP2,MMP13,ADAMTS4	3/276
15_Member	GO Biological Processes	GO:0045229	external encapsulating structure organization	-2.87867	-0.906693	4313,4322,9507	MMP2,MMP13,ADAMTS4	3/277
15_Member	GO Molecular Functions	GO:0004175	endopeptidase activity	-2.43223	-0.527982	4313,4322,9507	MMP2,MMP13,ADAMTS4	3/398
15_Member	GO Cellular Components	GO:0062023	collagen-containing extracellular matrix	-2.34405	-0.446036	3320,4313,9507	HSP90AA1,MMP2,ADAMTS4	3/428
15_Member	GO Biological Processes	GO:0040007	growth	-2.33561	-0.440668	2778,4322,7157	GNAS,MMP13,TP53	3/431
15_Member	GO Biological Processes	GO:0048589	developmental growth	-2.33561	-0.440668	2778,4322,7157	GNAS,MMP13,TP53	3/431
16_Summary	GO Biological Processes	GO:0042220	response to cocaine	-4.93067	-2.56167	3320,6531,6532,196,4353,4780,2778,5467,7157,240,2740,150,3309,4313,7421	HSP90AA1,SLC6A3,SLC6A4,AHR,MPO,NFE2L2,GNAS,PPARD,TP53,ALOX5,GLP1R,ADRA2A,HSPA5,MMP2,VDR	15/-
16_Member	GO Biological Processes	GO:0042220	response to cocaine	-4.93067	-2.56167	3320,6531,6532	HSP90AA1,SLC6A3,SLC6A4	3/56
16_Member	GO Biological Processes	GO:0009636	response to toxic substance	-4.39696	-2.12579	196,4353,4780,6532	AHR,MPO,NFE2L2,SLC6A4	4/247
16_Member	GO Biological Processes	GO:0043279	response to alkaloid	-4.1618	-1.93565	3320,6531,6532	HSP90AA1,SLC6A3,SLC6A4	3/101
16_Member	GO Biological Processes	GO:0040008	regulation of growth	-4.00956	-1.80896	2778,5467,6531,6532,7157	GNAS,PPARD,SLC6A3,SLC6A4,TP53	5/607
16_Member	KEGG Pathway	hsa04726	Serotonergic synapse	-3.99423	-1.80284	240,2778,6532	ALOX5,GNAS,SLC6A4	3/115
16_Member	GO Biological Processes	GO:0048638	regulation of developmental growth	-3.97196	-1.7836	2778,5467,6531,6532	GNAS,PPARD,SLC6A3,SLC6A4	4/318
16_Member	GO Biological Processes	GO:0050890	cognition	-3.95626	-1.7709	2740,2778,6531,6532	GLP1R,GNAS,SLC6A3,SLC6A4	4/321
16_Member	GO Biological Processes	GO:0046683	response to organophosphorus	-3.83655	-1.68295	196,6531,6532	AHR,SLC6A3,SLC6A4	3/130
16_Member	GO Biological Processes	GO:0007623	circadian rhythm	-3.75996	-1.62542	196,6532,7157	AHR,SLC6A4,TP53	3/138
16_Member	GO Biological Processes	GO:0014074	response to purine-containing compound	-3.69661	-1.58793	196,6531,6532	AHR,SLC6A3,SLC6A4	3/145
16_Member	GO Cellular Components	GO:0042734	presynaptic membrane	-3.50117	-1.42089	150,6531,6532	ADRA2A,SLC6A3,SLC6A4	3/169
16_Member	GO Biological Processes	GO:0060322	head development	-3.50044	-1.42089	3309,4313,6531,6532,7157	HSPA5,MMP2,SLC6A3,SLC6A4,TP53	5/781
16_Member	GO Biological Processes	GO:0045926	negative regulation of growth	-3.10044	-1.07799	2778,6532,7157	GNAS,SLC6A4,TP53	3/232
16_Member	GO Biological Processes	GO:0046903	secretion	-3.08773	-1.06734	2740,2778,6531,7421	GLP1R,GNAS,SLC6A3,VDR	4/544
16_Member	GO Biological Processes	GO:0097305	response to alcohol	-2.94334	-0.950727	196,2778,6531	AHR,GNAS,SLC6A3	3/263
16_Member	GO Biological Processes	GO:0007610	behavior	-2.8826	-0.908785	2740,6531,6532,7157	GLP1R,SLC6A3,SLC6A4,TP53	4/618
16_Member	GO Cellular Components	GO:0045211	postsynaptic membrane	-2.86526	-0.900551	150,6531,6532	ADRA2A,SLC6A3,SLC6A4	3/280
16_Member	GO Biological Processes	GO:0007420	brain development	-2.61619	-0.681086	3309,6531,6532,7157	HSPA5,SLC6A3,SLC6A4,TP53	4/731
16_Member	GO Cellular Components	GO:0097060	synaptic membrane	-2.42309	-0.520413	150,6531,6532	ADRA2A,SLC6A3,SLC6A4	3/401
16_Member	GO Cellular Components	GO:0098793	presynapse	-2.00187	-0.122011	150,6531,6532	ADRA2A,SLC6A3,SLC6A4	3/570
17_Summary	GO Biological Processes	GO:0072594	establishment of protein localization to organelle	-3.79308	-1.64225	2740,3309,3320,7157	GLP1R,HSPA5,HSP90AA1,TP53	4/-
17_Member	GO Biological Processes	GO:0072594	establishment of protein localization to organelle	-3.79308	-1.64225	2740,3309,3320,7157	GLP1R,HSPA5,HSP90AA1,TP53	4/354
17_Member	GO Biological Processes	GO:0090150	establishment of protein localization to membrane	-3.07897	-1.06062	2740,3309,3320	GLP1R,HSPA5,HSP90AA1	3/236
17_Member	GO Biological Processes	GO:0006886	intracellular protein transport	-3.04669	-1.03442	2740,3309,3320,7157	GLP1R,HSPA5,HSP90AA1,TP53	4/558
17_Member	GO Biological Processes	GO:0006605	protein targeting	-2.97218	-0.975701	2740,3309,3320	GLP1R,HSPA5,HSP90AA1	3/257
17_Member	GO Biological Processes	GO:0033365	protein localization to organelle	-2.54692	-0.625073	2740,3309,3320,7157	GLP1R,HSPA5,HSP90AA1,TP53	4/764
17_Member	GO Biological Processes	GO:0043254	regulation of protein-containing complex assembly	-2.36114	-0.460024	3309,3320,7157	HSPA5,HSP90AA1,TP53	3/422
17_Member	GO Biological Processes	GO:0072657	protein localization to membrane	-2.23381	-0.341927	2740,3309,3320	GLP1R,HSPA5,HSP90AA1	3/469
17_Member	GO Biological Processes	GO:0051668	localization within membrane	-2.03119	-0.148355	2740,3309,3320	GLP1R,HSPA5,HSP90AA1	3/556
18_Summary	GO Biological Processes	GO:0061041	regulation of wound healing	-3.75996	-1.62542	150,240,4780,151,2740,5468,7157	ADRA2A,ALOX5,NFE2L2,ADRA2B,GLP1R,PPARG,TP53	7/-
18_Member	GO Biological Processes	GO:0061041	regulation of wound healing	-3.75996	-1.62542	150,240,4780	ADRA2A,ALOX5,NFE2L2	3/138
18_Member	GO Biological Processes	GO:1903034	regulation of response to wounding	-3.42809	-1.36011	150,240,4780	ADRA2A,ALOX5,NFE2L2	3/179
18_Member	GO Biological Processes	GO:0008217	regulation of blood pressure	-3.37261	-1.32255	151,2740,5468	ADRA2B,GLP1R,PPARG	3/187
18_Member	GO Biological Processes	GO:0071375	cellular response to peptide hormone stimulus	-3.01678	-1.01288	2740,4780,5468	GLP1R,NFE2L2,PPARG	3/248
18_Member	GO Biological Processes	GO:0030162	regulation of proteolysis	-2.93261	-0.943824	150,4780,5468,7157	ADRA2A,NFE2L2,PPARG,TP53	4/599
18_Member	GO Biological Processes	GO:0045862	positive regulation of proteolysis	-2.63587	-0.695687	150,4780,5468	ADRA2A,NFE2L2,PPARG	3/337
18_Member	GO Biological Processes	GO:0045765	regulation of angiogenesis	-2.56504	-0.639914	240,4780,5468	ALOX5,NFE2L2,PPARG	3/357
18_Member	GO Biological Processes	GO:1901342	regulation of vasculature development	-2.53453	-0.617557	240,4780,5468	ALOX5,NFE2L2,PPARG	3/366
18_Member	GO Biological Processes	GO:0043434	response to peptide hormone	-2.48864	-0.581245	2740,4780,5468	GLP1R,NFE2L2,PPARG	3/380
19_Summary	GO Molecular Functions	GO:0002020	protease binding	-3.75996	-1.62542	6531,7157,9507,3320	SLC6A3,TP53,ADAMTS4,HSP90AA1	4/-
19_Member	GO Molecular Functions	GO:0002020	protease binding	-3.75996	-1.62542	6531,7157,9507	SLC6A3,TP53,ADAMTS4	3/138
19_Member	GO Molecular Functions	GO:0019903	protein phosphatase binding	-3.71438	-1.59554	3320,6531,7157	HSP90AA1,SLC6A3,TP53	3/143
19_Member	GO Molecular Functions	GO:0019902	phosphatase binding	-3.35912	-1.31343	3320,6531,7157	HSP90AA1,SLC6A3,TP53	3/189
20_Summary	GO Cellular Components	GO:0034774	secretory granule lumen	-2.692	-0.739729	240,3320,4353	ALOX5,HSP90AA1,MPO	3/-
20_Member	GO Cellular Components	GO:0034774	secretory granule lumen	-2.692	-0.739729	240,3320,4353	ALOX5,HSP90AA1,MPO	3/322
20_Member	GO Cellular Components	GO:0060205	cytoplasmic vesicle lumen	-2.67299	-0.725937	240,3320,4353	ALOX5,HSP90AA1,MPO	3/327
20_Member	GO Cellular Components	GO:0031983	vesicle lumen	-2.66922	-0.723898	240,3320,4353	ALOX5,HSP90AA1,MPO	3/328

## Sheet: Annotation-PP and Liver injury
MyList	Gene ID	Type	Tax ID	Homologene Gene ID	Homologene Gene Tax ID	GO:0004879 nuclear receptor activity	GO:0031667 response to nutrient levels	GO:0044703 multi-organism reproductive pr	GO:0009725 response to hormone	GO:0009410 response to xenobiotic stimulu	GO:0071407 cellular response to organic c	GO:0010817 regulation of hormone levels	hsa05207 Chemical carcinogenesis - rece	hsa05417 Lipid and atherosclerosis	GO:0048511 rhythmic process	GO:0032787 monocarboxylic acid metabolic	GO:0009651 response to salt stress	hsa04976 Bile secretion	hsa04928 Parathyroid hormone synthesis,	GO:0001501 skeletal system development	GO:0042220 response to cocaine	GO:0072594 establishment of protein local	GO:0061041 regulation of wound healing	GO:0002020 protease binding	GO:0034774 secretory granule lumen
TARDBP	23435	symbol	H. sapiens	23435	H. sapiens	1	0	1	0	0	0	1	0	1	1	0	0	0	0	0	0	0	0	0	0
HSPA5	3309	symbol	H. sapiens	3309	H. sapiens	0	1	1	0	0	0	0	0	1	1	0	0	0	0	0	1	1	0	0	0
RXRA	6256	symbol	H. sapiens	6256	H. sapiens	1	0	0	1	0	1	0	1	1	0	0	0	1	1	0	0	0	0	0	0
PPARD	5467	symbol	H. sapiens	5467	H. sapiens	1	1	1	1	1	1	0	0	0	0	1	1	0	0	0	1	0	0	0	0
AHR	196	symbol	H. sapiens	196	H. sapiens	1	1	0	0	1	1	0	1	0	1	0	0	0	0	0	1	0	0	0	0
VDR	7421	symbol	H. sapiens	7421	H. sapiens	1	1	1	1	0	1	0	1	0	0	0	0	1	1	1	1	0	0	0	0
PPARG	5468	symbol	H. sapiens	5468	H. sapiens	1	1	1	1	0	0	1	0	1	1	1	1	0	0	0	0	0	1	0	0
GNAS	2778	symbol	H. sapiens	2778	H. sapiens	0	1	1	1	0	1	0	1	1	0	0	0	1	1	1	1	0	0	0	0
TP53	7157	symbol	H. sapiens	7157	H. sapiens	1	1	1	1	1	0	0	1	1	1	1	1	0	0	1	1	1	1	1	0
NR1H4	9971	symbol	H. sapiens	9971	H. sapiens	1	1	1	0	0	1	1	0	0	0	1	0	1	0	0	0	0	0	0	0
GLP1R	2740	symbol	H. sapiens	2740	H. sapiens	0	1	1	1	0	0	1	0	0	0	0	0	0	0	0	1	1	1	0	0
CYP3A4	1576	symbol	H. sapiens	1576	H. sapiens	0	0	0	0	1	0	1	1	0	0	1	0	1	0	0	0	0	0	0	0
HSP90AA1	3320	symbol	H. sapiens	3320	H. sapiens	0	1	1	1	1	0	1	1	1	1	0	1	0	0	1	1	1	0	1	1
NFE2L2	4780	symbol	H. sapiens	4780	H. sapiens	1	1	1	1	1	0	0	0	1	0	1	0	0	0	0	1	0	1	0	0
MPO	4353	symbol	H. sapiens	4353	H. sapiens	1	1	0	0	1	0	0	0	1	0	1	0	0	0	0	1	0	0	0	1
ALOX5	240	symbol	H. sapiens	240	H. sapiens	1	0	0	0	0	0	1	0	1	0	1	0	0	1	0	1	0	1	0	1
ADAMTS4	9507	symbol	H. sapiens	9507	H. sapiens	0	0	0	0	0	0	0	0	0	0	0	0	0	0	1	0	0	0	1	0
MMP13	4322	symbol	H. sapiens	4322	H. sapiens	0	0	0	0	0	0	0	0	0	0	0	0	0	1	1	0	0	0	0	0
MMP2	4313	symbol	H. sapiens	4313	H. sapiens	1	1	1	1	1	1	0	0	1	1	0	1	0	0	1	1	0	0	0	0
ADRA2A	150	symbol	H. sapiens	150	H. sapiens	1	0	1	1	0	0	1	0	1	1	0	0	0	0	0	1	0	1	0	0
ADRA2B	151	symbol	H. sapiens	151	H. sapiens	0	0	1	0	0	0	1	0	0	0	0	0	0	0	0	0	0	1	0	0
AKR1B1	231	symbol	H. sapiens	231	H. sapiens	0	0	1	0	0	0	1	0	1	0	1	1	0	0	0	0	0	0	0	0
SLC6A4	6532	symbol	H. sapiens	6532	H. sapiens	1	1	1	0	1	1	1	0	0	1	0	0	0	0	0	1	0	0	0	0
SLC6A3	6531	symbol	H. sapiens	6531	H. sapiens	1	0	1	0	1	0	0	0	1	0	1	0	0	0	0	1	0	0	1	0

## Sheet: Enrichment-PT and Brain injury
GroupID	Category	Term	Description	LogP	Log(q-value)	Genes	Symbols	InTerm_InList
1_Summary	GO Biological Processes	GO:0009725	response to hormone	-33.9367	-29.59	142,367,590,706,890,1432,1513,1520,1585,1956,2099,2322,2908,2932,3061,3480,3643,3716,3717,3784,4193,4306,4780,4986,5241,5467,5468,5594,5724,5743,5747,7068,7297,7298,7421,7442,983,3356,3753,4988,23385,120892,2263,5599	PARP1,AR,BCHE,TSPO,CCNA2,MAPK14,CTSK,CTSS,CYP11B2,EGFR,ESR1,FLT3,NR3C1,GSK3B,HCRTR1,IGF1R,INSR,JAK1,JAK2,KCNQ1,MDM2,NR3C2,NFE2L2,OPRK1,PGR,PPARD,PPARG,MAPK1,PTAFR,PTGS2,PTK2,THRB,TYK2,TYMS,VDR,TRPV1,CDK1,HTR2A,KCNE1,OPRM1,NCSTN,LRRK2,FGFR2,MAPK8	44/-
1_Member	GO Biological Processes	GO:0009725	response to hormone	-33.9367	-29.59	142,367,590,706,890,1432,1513,1520,1585,1956,2099,2322,2908,2932,3061,3480,3643,3716,3717,3784,4193,4306,4780,4986,5241,5467,5468,5594,5724,5743,5747,7068,7297,7298,7421,7442	PARP1,AR,BCHE,TSPO,CCNA2,MAPK14,CTSK,CTSS,CYP11B2,EGFR,ESR1,FLT3,NR3C1,GSK3B,HCRTR1,IGF1R,INSR,JAK1,JAK2,KCNQ1,MDM2,NR3C2,NFE2L2,OPRK1,PGR,PPARD,PPARG,MAPK1,PTAFR,PTGS2,PTK2,THRB,TYK2,TYMS,VDR,TRPV1	36/795
1_Member	GO Biological Processes	GO:0032870	cellular response to hormone stimulus	-25.1709	-21.3013	142,367,890,1520,1585,1956,2099,2322,2908,2932,3061,3480,3643,3716,3717,4193,4306,4780,5241,5467,5468,5594,5747,7068,7297,7421	PARP1,AR,CCNA2,CTSS,CYP11B2,EGFR,ESR1,FLT3,NR3C1,GSK3B,HCRTR1,IGF1R,INSR,JAK1,JAK2,MDM2,NR3C2,NFE2L2,PGR,PPARD,PPARG,MAPK1,PTK2,THRB,TYK2,VDR	26/514
1_Member	GO Biological Processes	GO:0071407	cellular response to organic cyclic compound	-24.7703	-21.0256	367,890,983,1956,2099,2322,2908,2932,3356,3480,3717,3753,3784,4193,4306,4988,5241,5467,5594,5724,5743,7421,7442,23385,120892	AR,CCNA2,CDK1,EGFR,ESR1,FLT3,NR3C1,GSK3B,HTR2A,IGF1R,JAK2,KCNE1,KCNQ1,MDM2,NR3C2,OPRM1,PGR,PPARD,MAPK1,PTAFR,PTGS2,VDR,TRPV1,NCSTN,LRRK2	25/467
1_Member	GO Biological Processes	GO:0071396	cellular response to lipid	-16.6326	-13.5163	367,706,890,1432,1956,2099,2263,2322,2908,2932,3480,3717,4306,4986,5241,5467,5594,5599,5724,7421	AR,TSPO,CCNA2,MAPK14,EGFR,ESR1,FGFR2,FLT3,NR3C1,GSK3B,IGF1R,JAK2,NR3C2,OPRK1,PGR,PPARD,MAPK1,MAPK8,PTAFR,VDR	20/536
2_Summary	GO Biological Processes	GO:1901699	cellular response to nitrogen compound	-29.5193	-25.4736	43,142,890,1017,1128,1129,1131,1132,1585,2932,3356,3480,3643,3716,3717,3753,3784,4193,4780,4988,5468,5594,5663,5724,5743,5747,7297,7442,23385,120892,1432,1513,4986	ACHE,PARP1,CCNA2,CDK2,CHRM1,CHRM2,CHRM3,CHRM4,CYP11B2,GSK3B,HTR2A,IGF1R,INSR,JAK1,JAK2,KCNE1,KCNQ1,MDM2,NFE2L2,OPRM1,PPARG,MAPK1,PSEN1,PTAFR,PTGS2,PTK2,TYK2,TRPV1,NCSTN,LRRK2,MAPK14,CTSK,OPRK1	33/-
2_Member	GO Biological Processes	GO:1901699	cellular response to nitrogen compound	-29.5193	-25.4736	43,142,890,1017,1128,1129,1131,1132,1585,2932,3356,3480,3643,3716,3717,3753,3784,4193,4780,4988,5468,5594,5663,5724,5743,5747,7297,7442,23385,120892	ACHE,PARP1,CCNA2,CDK2,CHRM1,CHRM2,CHRM3,CHRM4,CYP11B2,GSK3B,HTR2A,IGF1R,INSR,JAK1,JAK2,KCNE1,KCNQ1,MDM2,NFE2L2,OPRM1,PPARG,MAPK1,PSEN1,PTAFR,PTGS2,PTK2,TYK2,TRPV1,NCSTN,LRRK2	30/582
2_Member	GO Biological Processes	GO:0071417	cellular response to organonitrogen compound	-22.4776	-18.8298	142,890,1585,2932,3356,3480,3643,3716,3717,3753,3784,4193,4780,4988,5468,5594,5663,5724,5743,5747,7297,7442,23385,120892	PARP1,CCNA2,CYP11B2,GSK3B,HTR2A,IGF1R,INSR,JAK1,JAK2,KCNE1,KCNQ1,MDM2,NFE2L2,OPRM1,PPARG,MAPK1,PSEN1,PTAFR,PTGS2,PTK2,TYK2,TRPV1,NCSTN,LRRK2	24/507
2_Member	GO Biological Processes	GO:0043434	response to peptide hormone	-19.5474	-16.1037	142,890,1432,1513,1585,2932,3480,3643,3716,3717,3784,4193,4780,4986,5468,5594,5743,5747,7297,7442	PARP1,CCNA2,MAPK14,CTSK,CYP11B2,GSK3B,IGF1R,INSR,JAK1,JAK2,KCNQ1,MDM2,NFE2L2,OPRK1,PPARG,MAPK1,PTGS2,PTK2,TYK2,TRPV1	20/380
2_Member	GO Biological Processes	GO:0071375	cellular response to peptide hormone stimulus	-14.1045	-11.2763	142,890,1585,2932,3480,3643,3716,3717,4193,4780,5468,5594,5747,7297	PARP1,CCNA2,CYP11B2,GSK3B,IGF1R,INSR,JAK1,JAK2,MDM2,NFE2L2,PPARG,MAPK1,PTK2,TYK2	14/248
3_Summary	KEGG Pathway	hsa05200	Pathways in cancer	-21.9662	-18.3977	367,890,898,1017,1956,2064,2099,2260,2263,2322,2932,3480,3716,3717,4193,4780,5467,5468,5594,5599,5602,5743,5747,8900,5663,7297,1432,1586	AR,CCNA2,CCNE1,CDK2,EGFR,ERBB2,ESR1,FGFR1,FGFR2,FLT3,GSK3B,IGF1R,JAK1,JAK2,MDM2,NFE2L2,PPARD,PPARG,MAPK1,MAPK8,MAPK10,PTGS2,PTK2,CCNA1,PSEN1,TYK2,MAPK14,CYP17A1	28/-
3_Member	KEGG Pathway	hsa05200	Pathways in cancer	-21.9662	-18.3977	367,890,898,1017,1956,2064,2099,2260,2263,2322,2932,3480,3716,3717,4193,4780,5467,5468,5594,5599,5602,5743,5747,8900	AR,CCNA2,CCNE1,CDK2,EGFR,ERBB2,ESR1,FGFR1,FGFR2,FLT3,GSK3B,IGF1R,JAK1,JAK2,MDM2,NFE2L2,PPARD,PPARG,MAPK1,MAPK8,MAPK10,PTGS2,PTK2,CCNA1	24/533
3_Member	KEGG Pathway	hsa05215	Prostate cancer	-14.465	-11.6096	367,898,1017,1956,2064,2260,2263,2932,3480,4193,5594	AR,CCNE1,CDK2,EGFR,ERBB2,FGFR1,FGFR2,GSK3B,IGF1R,MDM2,MAPK1	11/98
3_Member	KEGG Pathway	hsa05165	Human papillomavirus infection	-11.0827	-8.6603	890,898,1017,1956,2932,3716,4193,5594,5663,5743,5747,7297,8900	CCNA2,CCNE1,CDK2,EGFR,GSK3B,JAK1,MDM2,MAPK1,PSEN1,PTGS2,PTK2,TYK2,CCNA1	13/333
3_Member	KEGG Pathway	hsa05226	Gastric cancer	-6.68457	-4.8272	898,1017,1956,2064,2263,2932,5594	CCNE1,CDK2,EGFR,ERBB2,FGFR2,GSK3B,MAPK1	7/150
3_Member	KEGG Pathway	hsa05163	Human cytomegalovirus infection	-6.64862	-4.79537	1432,1956,2932,3716,4193,5594,5743,5747	MAPK14,EGFR,GSK3B,JAK1,MDM2,MAPK1,PTGS2,PTK2	8/226
3_Member	KEGG Pathway	hsa04934	Cushing syndrome	-5.32572	-3.67536	898,1017,1586,1956,2932,5594	CCNE1,CDK2,CYP17A1,EGFR,GSK3B,MAPK1	6/155
3_Member	KEGG Pathway	hsa05160	Hepatitis C	-5.26207	-3.62631	1017,1956,2932,3716,5594,7297	CDK2,EGFR,GSK3B,JAK1,MAPK1,TYK2	6/159
4_Summary	GO Biological Processes	GO:0044057	regulation of system process	-21.2649	-17.7633	142,706,1129,1131,1956,2260,3274,3356,3741,3753,3784,4193,4986,5468,5724,5743,6331,7068,7137,7139,7442,8864,10060,120892,367,1585,5742,6335,3643	PARP1,TSPO,CHRM2,CHRM3,EGFR,FGFR1,HRH2,HTR2A,KCNA5,KCNE1,KCNQ1,MDM2,OPRK1,PPARG,PTAFR,PTGS2,SCN5A,THRB,TNNI3,TNNT2,TRPV1,PER2,ABCC9,LRRK2,AR,CYP11B2,PTGS1,SCN9A,INSR	29/-
4_Member	GO Biological Processes	GO:0044057	regulation of system process	-21.2649	-17.7633	142,706,1129,1131,1956,2260,3274,3356,3741,3753,3784,4193,4986,5468,5724,5743,6331,7068,7137,7139,7442,8864,10060,120892	PARP1,TSPO,CHRM2,CHRM3,EGFR,FGFR1,HRH2,HTR2A,KCNA5,KCNE1,KCNQ1,MDM2,OPRK1,PPARG,PTAFR,PTGS2,SCN5A,THRB,TNNI3,TNNT2,TRPV1,PER2,ABCC9,LRRK2	24/571
4_Member	GO Biological Processes	GO:0008015	blood circulation	-17.35	-14.1494	367,1585,1956,3274,3356,3741,3753,3784,5468,5724,5742,5743,6331,6335,7137,7139,7442,8864,10060	AR,CYP11B2,EGFR,HRH2,HTR2A,KCNA5,KCNE1,KCNQ1,PPARG,PTAFR,PTGS1,PTGS2,SCN5A,SCN9A,TNNI3,TNNT2,TRPV1,PER2,ABCC9	19/419
4_Member	GO Biological Processes	GO:0003013	circulatory system process	-17.066	-13.8953	367,1585,1956,3274,3356,3643,3741,3753,3784,5468,5724,5742,5743,6331,6335,7137,7139,7442,8864,10060	AR,CYP11B2,EGFR,HRH2,HTR2A,INSR,KCNA5,KCNE1,KCNQ1,PPARG,PTAFR,PTGS1,PTGS2,SCN5A,SCN9A,TNNI3,TNNT2,TRPV1,PER2,ABCC9	20/509
4_Member	GO Biological Processes	GO:1903522	regulation of blood circulation	-16.6941	-13.5515	1129,1956,3274,3356,3741,3753,3784,4193,5743,6331,7068,7137,7139,7442,8864,10060	CHRM2,EGFR,HRH2,HTR2A,KCNA5,KCNE1,KCNQ1,MDM2,PTGS2,SCN5A,THRB,TNNI3,TNNT2,TRPV1,PER2,ABCC9	16/260
4_Member	GO Biological Processes	GO:0008016	regulation of heart contraction	-10.862	-8.45978	1129,3741,3753,3784,4193,6331,7068,7137,7139,7442,10060	CHRM2,KCNA5,KCNE1,KCNQ1,MDM2,SCN5A,THRB,TNNI3,TNNT2,TRPV1,ABCC9	11/207
4_Member	GO Biological Processes	GO:0008217	regulation of blood pressure	-9.9368	-7.66562	367,1585,3784,5468,5724,5742,5743,7137,7442,10060	AR,CYP11B2,KCNQ1,PPARG,PTAFR,PTGS1,PTGS2,TNNI3,TRPV1,ABCC9	10/187
5_Summary	GO Biological Processes	GO:0048545	response to steroid hormone	-18.9589	-15.5664	142,367,590,706,1956,2099,2322,2908,3480,3717,4193,4306,5241,5467,5594,5724,5743,7298,3988,240,3620,4780,5663,6335,7442	PARP1,AR,BCHE,TSPO,EGFR,ESR1,FLT3,NR3C1,IGF1R,JAK2,MDM2,NR3C2,PGR,PPARD,MAPK1,PTAFR,PTGS2,TYMS,LIPA,ALOX5,IDO1,NFE2L2,PSEN1,SCN9A,TRPV1	25/-
5_Member	GO Biological Processes	GO:0048545	response to steroid hormone	-18.9589	-15.5664	142,367,590,706,1956,2099,2322,2908,3480,3717,4193,4306,5241,5467,5594,5724,5743,7298	PARP1,AR,BCHE,TSPO,EGFR,ESR1,FLT3,NR3C1,IGF1R,JAK2,MDM2,NR3C2,PGR,PPARD,MAPK1,PTAFR,PTGS2,TYMS	18/286
5_Member	GO Biological Processes	GO:0031960	response to corticosteroid	-10.6605	-8.28695	142,590,1956,2322,2908,3480,3717,5724,5743,7298	PARP1,BCHE,EGFR,FLT3,NR3C1,IGF1R,JAK2,PTAFR,PTGS2,TYMS	10/158
5_Member	GO Biological Processes	GO:0051384	response to glucocorticoid	-9.80976	-7.55294	590,1956,2322,2908,3480,3717,5724,5743,7298	BCHE,EGFR,FLT3,NR3C1,IGF1R,JAK2,PTAFR,PTGS2,TYMS	9/136
5_Member	GO Biological Processes	GO:1901654	response to ketone	-9.26593	-7.09509	142,367,706,1956,2908,3480,3717,3988,5724,7298	PARP1,AR,TSPO,EGFR,NR3C1,IGF1R,JAK2,LIPA,PTAFR,TYMS	10/219
5_Member	GO Biological Processes	GO:0071548	response to dexamethasone	-6.79171	-4.92928	1956,2908,3480,3717,5724	EGFR,NR3C1,IGF1R,JAK2,PTAFR	5/45
5_Member	GO Biological Processes	GO:0071385	cellular response to glucocorticoid stimulus	-6.34669	-4.53904	1956,2322,2908,3480,3717	EGFR,FLT3,NR3C1,IGF1R,JAK2	5/55
5_Member	GO Biological Processes	GO:0006954	inflammatory response	-6.23111	-4.43948	240,1956,2908,3620,3717,3988,4780,5663,5724,6335,7442	ALOX5,EGFR,NR3C1,IDO1,JAK2,LIPA,NFE2L2,PSEN1,PTAFR,SCN9A,TRPV1	11/579
5_Member	GO Biological Processes	GO:0071384	cellular response to corticosteroid stimulus	-5.98056	-4.2249	1956,2322,2908,3480,3717	EGFR,FLT3,NR3C1,IGF1R,JAK2	5/65
5_Member	GO Biological Processes	GO:0071549	cellular response to dexamethasone stimulus	-5.97292	-4.21949	1956,2908,3480,3717	EGFR,NR3C1,IGF1R,JAK2	4/28
5_Member	GO Biological Processes	GO:1901655	cellular response to ketone	-4.91048	-3.3204	367,1956,2908,3480,3717	AR,EGFR,NR3C1,IGF1R,JAK2	5/107
6_Summary	GO Biological Processes	GO:0006468	protein phosphorylation	-18.7235	-15.3767	898,983,1017,1432,1956,2064,2260,2263,2322,2932,3480,3643,3716,3717,3791,5594,5599,5602,5747,7297,120892,1128,1129,4170,4193,23476,142,890,1513,2908,4985,5468,7442,367,891,8900,2099,3356,5663,5724,5743,3061,4986,4988,6331,4306,7421,5467,4780,3988,706	CCNE1,CDK1,CDK2,MAPK14,EGFR,ERBB2,FGFR1,FGFR2,FLT3,GSK3B,IGF1R,INSR,JAK1,JAK2,KDR,MAPK1,MAPK8,MAPK10,PTK2,TYK2,LRRK2,CHRM1,CHRM2,MCL1,MDM2,BRD4,PARP1,CCNA2,CTSK,NR3C1,OPRD1,PPARG,TRPV1,AR,CCNB1,CCNA1,ESR1,HTR2A,PSEN1,PTAFR,PTGS2,HCRTR1,OPRK1,OPRM1,SCN5A,NR3C2,VDR,PPARD,NFE2L2,LIPA,TSPO	51/-
6_Member	GO Biological Processes	GO:0006468	protein phosphorylation	-18.7235	-15.3767	898,983,1017,1432,1956,2064,2260,2263,2322,2932,3480,3643,3716,3717,3791,5594,5599,5602,5747,7297,120892	CCNE1,CDK1,CDK2,MAPK14,EGFR,ERBB2,FGFR1,FGFR2,FLT3,GSK3B,IGF1R,INSR,JAK1,JAK2,KDR,MAPK1,MAPK8,MAPK10,PTK2,TYK2,LRRK2	21/489
6_Member	KEGG Pathway	hsa04151	PI3K-Akt signaling pathway	-18.5344	-15.2291	898,1017,1128,1129,1956,2064,2260,2263,2322,2932,3480,3643,3716,3717,3791,4170,4193,5594,5747	CCNE1,CDK2,CHRM1,CHRM2,EGFR,ERBB2,FGFR1,FGFR2,FLT3,GSK3B,IGF1R,INSR,JAK1,JAK2,KDR,MCL1,MDM2,MAPK1,PTK2	19/362
6_Member	GO Biological Processes	GO:0016310	phosphorylation	-17.7316	-14.4641	898,983,1017,1432,1956,2064,2260,2263,2322,2932,3480,3643,3716,3717,3791,5594,5599,5602,5747,7297,120892	CCNE1,CDK1,CDK2,MAPK14,EGFR,ERBB2,FGFR1,FGFR2,FLT3,GSK3B,IGF1R,INSR,JAK1,JAK2,KDR,MAPK1,MAPK8,MAPK10,PTK2,TYK2,LRRK2	21/547
6_Member	GO Molecular Functions	GO:0004672	protein kinase activity	-17.4622	-14.2294	983,1017,1432,1956,2064,2260,2263,2322,2932,3480,3643,3716,3717,3791,5594,5599,5602,5747,7297,23476,120892	CDK1,CDK2,MAPK14,EGFR,ERBB2,FGFR1,FGFR2,FLT3,GSK3B,IGF1R,INSR,JAK1,JAK2,KDR,MAPK1,MAPK8,MAPK10,PTK2,TYK2,BRD4,LRRK2	21/564
6_Member	GO Biological Processes	GO:0018108	peptidyl-tyrosine phosphorylation	-16.5308	-13.4394	1956,2064,2260,2263,2322,3480,3643,3716,3717,3791,5747	EGFR,ERBB2,FGFR1,FGFR2,FLT3,IGF1R,INSR,JAK1,JAK2,KDR,PTK2	11/65
6_Member	GO Molecular Functions	GO:0016301	kinase activity	-16.4319	-13.364	898,983,1017,1432,1956,2064,2260,2263,2322,2932,3480,3643,3716,3717,3791,5594,5599,5602,5747,7297,23476,120892	CCNE1,CDK1,CDK2,MAPK14,EGFR,ERBB2,FGFR1,FGFR2,FLT3,GSK3B,IGF1R,INSR,JAK1,JAK2,KDR,MAPK1,MAPK8,MAPK10,PTK2,TYK2,BRD4,LRRK2	22/726
6_Member	GO Biological Processes	GO:0018212	peptidyl-tyrosine modification	-16.3757	-13.33	1956,2064,2260,2263,2322,3480,3643,3716,3717,3791,5747	EGFR,ERBB2,FGFR1,FGFR2,FLT3,IGF1R,INSR,JAK1,JAK2,KDR,PTK2	11/67
6_Member	GO Molecular Functions	GO:0016773	phosphotransferase activity, alcohol group as acceptor	-15.9324	-12.9079	983,1017,1432,1956,2064,2260,2263,2322,2932,3480,3643,3716,3717,3791,5594,5599,5602,5747,7297,23476,120892	CDK1,CDK2,MAPK14,EGFR,ERBB2,FGFR1,FGFR2,FLT3,GSK3B,IGF1R,INSR,JAK1,JAK2,KDR,MAPK1,MAPK8,MAPK10,PTK2,TYK2,BRD4,LRRK2	21/672
6_Member	GO Biological Processes	GO:0018193	peptidyl-amino acid modification	-15.6843	-12.68	983,1017,1432,1956,2064,2260,2263,2322,2932,3480,3643,3716,3717,3791,4193,5594,5599,5747,120892	CDK1,CDK2,MAPK14,EGFR,ERBB2,FGFR1,FGFR2,FLT3,GSK3B,IGF1R,INSR,JAK1,JAK2,KDR,MDM2,MAPK1,MAPK8,PTK2,LRRK2	19/516
6_Member	GO Biological Processes	GO:0070848	response to growth factor	-15.5926	-12.6076	142,890,1432,1513,1956,2064,2260,2263,2322,2908,3480,3643,3791,4193,4985,5468,5594,5747,7442	PARP1,CCNA2,MAPK14,CTSK,EGFR,ERBB2,FGFR1,FGFR2,FLT3,NR3C1,IGF1R,INSR,KDR,MDM2,OPRD1,PPARG,MAPK1,PTK2,TRPV1	19/522
6_Member	GO Biological Processes	GO:0071363	cellular response to growth factor stimulus	-14.8346	-11.935	142,890,1432,1513,1956,2064,2260,2263,2322,2908,3480,3643,3791,4193,4985,5468,5747,7442	PARP1,CCNA2,MAPK14,CTSK,EGFR,ERBB2,FGFR1,FGFR2,FLT3,NR3C1,IGF1R,INSR,KDR,MDM2,OPRD1,PPARG,PTK2,TRPV1	18/490
6_Member	GO Molecular Functions	GO:0004713	protein tyrosine kinase activity	-14.385	-11.5435	1956,2064,2260,2263,2322,3480,3643,3716,3717,3791,5747,7297	EGFR,ERBB2,FGFR1,FGFR2,FLT3,IGF1R,INSR,JAK1,JAK2,KDR,PTK2,TYK2	12/138
6_Member	GO Biological Processes	GO:0007169	cell surface receptor protein tyrosine kinase signaling pathway	-13.3831	-10.6162	367,1432,1956,2064,2260,2263,2322,2932,3480,3643,3716,3717,3791,5594,5747,7297	AR,MAPK14,EGFR,ERBB2,FGFR1,FGFR2,FLT3,GSK3B,IGF1R,INSR,JAK1,JAK2,KDR,MAPK1,PTK2,TYK2	16/423
6_Member	GO Biological Processes	GO:0007167	enzyme-linked receptor protein signaling pathway	-13.108	-10.3947	142,367,1432,1956,2064,2260,2263,2322,2932,3480,3643,3716,3717,3791,5468,5594,5747,7297	PARP1,AR,MAPK14,EGFR,ERBB2,FGFR1,FGFR2,FLT3,GSK3B,IGF1R,INSR,JAK1,JAK2,KDR,PPARG,MAPK1,PTK2,TYK2	18/618
6_Member	GO Biological Processes	GO:0051338	regulation of transferase activity	-13.0486	-10.3551	890,891,898,1956,2064,2260,2263,2322,2932,3480,3643,3717,3791,5468,5594,5747,8900,120892	CCNA2,CCNB1,CCNE1,EGFR,ERBB2,FGFR1,FGFR2,FLT3,GSK3B,IGF1R,INSR,JAK2,KDR,PPARG,MAPK1,PTK2,CCNA1,LRRK2	18/623
6_Member	KEGG Pathway	hsa01522	Endocrine resistance	-12.7116	-10.0461	1432,1956,2064,2099,3480,4193,5594,5599,5602,5747	MAPK14,EGFR,ERBB2,ESR1,IGF1R,MDM2,MAPK1,MAPK8,MAPK10,PTK2	10/99
6_Member	GO Biological Processes	GO:0010562	positive regulation of phosphorus metabolic process	-12.269	-9.66683	367,1956,2064,2260,2263,2322,3356,3480,3643,3717,3791,4985,5594,5663,5724,5743,5747,120892	AR,EGFR,ERBB2,FGFR1,FGFR2,FLT3,HTR2A,IGF1R,INSR,JAK2,KDR,OPRD1,MAPK1,PSEN1,PTAFR,PTGS2,PTK2,LRRK2	18/693
6_Member	GO Biological Processes	GO:0045937	positive regulation of phosphate metabolic process	-12.269	-9.66683	367,1956,2064,2260,2263,2322,3356,3480,3643,3717,3791,4985,5594,5663,5724,5743,5747,120892	AR,EGFR,ERBB2,FGFR1,FGFR2,FLT3,HTR2A,IGF1R,INSR,JAK2,KDR,OPRD1,MAPK1,PSEN1,PTAFR,PTGS2,PTK2,LRRK2	18/693
6_Member	GO Biological Processes	GO:0046777	protein autophosphorylation	-12.2344	-9.6435	1956,2260,2263,2322,2932,3480,3643,3717,3791,5747,120892	EGFR,FGFR1,FGFR2,FLT3,GSK3B,IGF1R,INSR,JAK2,KDR,PTK2,LRRK2	11/155
6_Member	GO Biological Processes	GO:0043549	regulation of kinase activity	-12.053	-9.48441	890,891,898,1956,2064,2260,2263,2322,3480,3643,3717,3791,5468,5747,8900,120892	CCNA2,CCNB1,CCNE1,EGFR,ERBB2,FGFR1,FGFR2,FLT3,IGF1R,INSR,JAK2,KDR,PPARG,PTK2,CCNA1,LRRK2	16/517
6_Member	GO Biological Processes	GO:0042327	positive regulation of phosphorylation	-12.0281	-9.4807	367,1956,2064,2260,2263,2322,3356,3480,3643,3717,3791,4985,5594,5663,5743,5747,120892	AR,EGFR,ERBB2,FGFR1,FGFR2,FLT3,HTR2A,IGF1R,INSR,JAK2,KDR,OPRD1,MAPK1,PSEN1,PTGS2,PTK2,LRRK2	17/614
6_Member	GO Biological Processes	GO:0043410	positive regulation of MAPK cascade	-11.5378	-9.0299	367,1956,2064,2260,2263,2322,3061,3356,3480,3643,3717,3791,4986,4988,120892	AR,EGFR,ERBB2,FGFR1,FGFR2,FLT3,HCRTR1,HTR2A,IGF1R,INSR,JAK2,KDR,OPRK1,OPRM1,LRRK2	15/467
6_Member	GO Biological Processes	GO:0043408	regulation of MAPK cascade	-11.5199	-9.02439	367,1956,2064,2260,2263,2322,3061,3356,3480,3643,3717,3791,4986,4988,5468,5594,120892	AR,EGFR,ERBB2,FGFR1,FGFR2,FLT3,HCRTR1,HTR2A,IGF1R,INSR,JAK2,KDR,OPRK1,OPRM1,PPARG,MAPK1,LRRK2	17/661
6_Member	GO Molecular Functions	GO:0004714	transmembrane receptor protein tyrosine kinase activity	-11.2528	-8.81454	1956,2064,2260,2263,2322,3480,3643,3791	EGFR,ERBB2,FGFR1,FGFR2,FLT3,IGF1R,INSR,KDR	8/60
6_Member	KEGG Pathway	hsa04010	MAPK signaling pathway	-10.3761	-8.05058	1432,1956,2064,2260,2263,2322,3480,3643,3791,5594,5599,5602	MAPK14,EGFR,ERBB2,FGFR1,FGFR2,FLT3,IGF1R,INSR,KDR,MAPK1,MAPK8,MAPK10	12/300
6_Member	GO Molecular Functions	GO:0019199	transmembrane receptor protein kinase activity	-10.2627	-7.94539	1956,2064,2260,2263,2322,3480,3643,3791	EGFR,ERBB2,FGFR1,FGFR2,FLT3,IGF1R,INSR,KDR	8/79
6_Member	GO Molecular Functions	GO:0019838	growth factor binding	-9.83853	-7.57816	1956,2064,2260,2263,2322,3480,3643,3791,6331	EGFR,ERBB2,FGFR1,FGFR2,FLT3,IGF1R,INSR,KDR,SCN5A	9/135
6_Member	GO Biological Processes	GO:0071900	regulation of protein serine/threonine kinase activity	-9.76434	-7.51103	890,891,898,1956,2064,2260,2322,3643,5468,8900,120892	CCNA2,CCNB1,CCNE1,EGFR,ERBB2,FGFR1,FLT3,INSR,PPARG,CCNA1,LRRK2	11/262
6_Member	KEGG Pathway	hsa05205	Proteoglycans in cancer	-9.56634	-7.34346	1432,1956,2064,2099,2260,3480,3791,4193,5594,5747	MAPK14,EGFR,ERBB2,ESR1,FGFR1,IGF1R,KDR,MDM2,MAPK1,PTK2	10/204
6_Member	GO Cellular Components	GO:0043235	receptor complex	-9.5292	-7.31281	1956,2064,2260,2263,2322,3356,3480,3643,3717,3791,4306,5468,7297,7421	EGFR,ERBB2,FGFR1,FGFR2,FLT3,HTR2A,IGF1R,INSR,JAK2,KDR,NR3C2,PPARG,TYK2,VDR	14/543
6_Member	GO Biological Processes	GO:0051347	positive regulation of transferase activity	-9.41246	-7.21114	1956,2064,2260,2263,2322,3480,3643,3717,3791,5594,5747,120892	EGFR,ERBB2,FGFR1,FGFR2,FLT3,IGF1R,INSR,JAK2,KDR,MAPK1,PTK2,LRRK2	12/364
6_Member	GO Biological Processes	GO:0045859	regulation of protein kinase activity	-9.40864	-7.21114	890,891,898,1956,2064,2260,2322,3643,3717,5468,5747,8900,120892	CCNA2,CCNB1,CCNE1,EGFR,ERBB2,FGFR1,FLT3,INSR,JAK2,PPARG,PTK2,CCNA1,LRRK2	13/455
6_Member	GO Biological Processes	GO:0001934	positive regulation of protein phosphorylation	-9.26608	-7.09509	1956,2064,2260,2322,3356,3643,3717,3791,4985,5594,5663,5743,5747,120892	EGFR,ERBB2,FGFR1,FLT3,HTR2A,INSR,JAK2,KDR,OPRD1,MAPK1,PSEN1,PTGS2,PTK2,LRRK2	14/569
6_Member	GO Biological Processes	GO:0033674	positive regulation of kinase activity	-9.26572	-7.09509	1956,2064,2260,2263,2322,3480,3643,3717,3791,5747,120892	EGFR,ERBB2,FGFR1,FGFR2,FLT3,IGF1R,INSR,JAK2,KDR,PTK2,LRRK2	11/292
6_Member	KEGG Pathway	hsa04014	Ras signaling pathway	-8.91564	-6.78376	1956,2260,2263,2322,3480,3643,3791,5594,5599,5602	EGFR,FGFR1,FGFR2,FLT3,IGF1R,INSR,KDR,MAPK1,MAPK8,MAPK10	10/238
6_Member	GO Biological Processes	GO:0031401	positive regulation of protein modification process	-8.64109	-6.54721	1956,2064,2260,2322,2932,3356,3643,3717,3791,4985,5594,5663,5743,5747,120892	EGFR,ERBB2,FGFR1,FLT3,GSK3B,HTR2A,INSR,JAK2,KDR,OPRD1,MAPK1,PSEN1,PTGS2,PTK2,LRRK2	15/755
6_Member	GO Biological Processes	GO:0051897	positive regulation of phosphatidylinositol 3-kinase/protein kinase B signal transduction	-8.58191	-6.5	1956,2260,2322,3480,3643,3717,3791,5467,5747	EGFR,FGFR1,FLT3,IGF1R,INSR,JAK2,KDR,PPARD,PTK2	9/187
6_Member	GO Biological Processes	GO:0048661	positive regulation of smooth muscle cell proliferation	-7.90051	-5.91172	1956,2263,3480,3717,4193,5724,5743	EGFR,FGFR2,IGF1R,JAK2,MDM2,PTAFR,PTGS2	7/100
6_Member	GO Biological Processes	GO:0048660	regulation of smooth muscle cell proliferation	-7.54271	-5.58692	1956,2263,3480,3717,4193,5468,5724,5743	EGFR,FGFR2,IGF1R,JAK2,MDM2,PPARG,PTAFR,PTGS2	8/173
6_Member	GO Biological Processes	GO:0051896	regulation of phosphatidylinositol 3-kinase/protein kinase B signal transduction	-7.15933	-5.25193	1956,2260,2322,3480,3643,3717,3791,5467,5747	EGFR,FGFR1,FLT3,IGF1R,INSR,JAK2,KDR,PPARD,PTK2	9/273
6_Member	GO Biological Processes	GO:0043405	regulation of MAP kinase activity	-7.13304	-5.22723	1956,2064,2260,2322,3643,5468,120892	EGFR,ERBB2,FGFR1,FLT3,INSR,PPARG,LRRK2	7/129
6_Member	GO Biological Processes	GO:0043406	positive regulation of MAP kinase activity	-7.05118	-5.1547	1956,2064,2260,2322,3643,120892	EGFR,ERBB2,FGFR1,FLT3,INSR,LRRK2	6/79
6_Member	GO Biological Processes	GO:0030335	positive regulation of cell migration	-7.04218	-5.14725	1956,2260,3480,3643,3717,3791,4193,4780,5594,5724,5743,5747	EGFR,FGFR1,IGF1R,INSR,JAK2,KDR,MDM2,NFE2L2,MAPK1,PTAFR,PTGS2,PTK2	12/595
6_Member	KEGG Pathway	hsa04015	Rap1 signaling pathway	-6.86088	-4.98398	1432,1956,2260,2263,3480,3643,3791,5594	MAPK14,EGFR,FGFR1,FGFR2,IGF1R,INSR,KDR,MAPK1	8/212
6_Member	GO Biological Processes	GO:2000147	positive regulation of cell motility	-6.82728	-4.95767	1956,2260,3480,3643,3717,3791,4193,4780,5594,5724,5743,5747	EGFR,FGFR1,IGF1R,INSR,JAK2,KDR,MDM2,NFE2L2,MAPK1,PTAFR,PTGS2,PTK2	12/623
6_Member	GO Biological Processes	GO:0040017	positive regulation of locomotion	-6.72391	-4.86291	1956,2260,3480,3643,3717,3791,4193,4780,5594,5724,5743,5747	EGFR,FGFR1,IGF1R,INSR,JAK2,KDR,MDM2,NFE2L2,MAPK1,PTAFR,PTGS2,PTK2	12/637
6_Member	GO Biological Processes	GO:0045860	positive regulation of protein kinase activity	-6.36891	-4.55426	1956,2064,2260,2322,3643,3717,5747,120892	EGFR,ERBB2,FGFR1,FLT3,INSR,JAK2,PTK2,LRRK2	8/246
6_Member	GO Biological Processes	GO:0071902	positive regulation of protein serine/threonine kinase activity	-5.88835	-4.14693	1956,2064,2260,2322,3643,120892	EGFR,ERBB2,FGFR1,FLT3,INSR,LRRK2	6/124
6_Member	KEGG Pathway	hsa05218	Melanoma	-5.72839	-4.01005	1956,2260,3480,4193,5594	EGFR,FGFR1,IGF1R,MDM2,MAPK1	5/73
6_Member	GO Biological Processes	GO:0000902	cell morphogenesis	-4.69215	-3.13712	367,1432,1956,2064,2263,3480,3988,5747,7421,120892	AR,MAPK14,EGFR,ERBB2,FGFR2,IGF1R,LIPA,PTK2,VDR,LRRK2	10/687
6_Member	GO Biological Processes	GO:0031175	neuron projection development	-4.65463	-3.10562	706,1956,2064,2260,2263,2932,3480,3717,5747,120892	TSPO,EGFR,ERBB2,FGFR1,FGFR2,GSK3B,IGF1R,JAK2,PTK2,LRRK2	10/694
6_Member	KEGG Pathway	hsa05214	Glioma	-4.21983	-2.73995	1956,3480,4193,5594	EGFR,IGF1R,MDM2,MAPK1	4/76
6_Member	GO Biological Processes	GO:0061564	axon development	-2.94844	-1.61875	706,2064,2263,3480,3717,5747	TSPO,ERBB2,FGFR2,IGF1R,JAK2,PTK2	6/421
6_Member	GO Biological Processes	GO:0048812	neuron projection morphogenesis	-2.63388	-1.34291	1956,2064,2263,3480,5747,120892	EGFR,ERBB2,FGFR2,IGF1R,PTK2,LRRK2	6/486
6_Member	GO Biological Processes	GO:0120039	plasma membrane bounded cell projection morphogenesis	-2.6118	-1.32426	1956,2064,2263,3480,5747,120892	EGFR,ERBB2,FGFR2,IGF1R,PTK2,LRRK2	6/491
6_Member	GO Biological Processes	GO:0048858	cell projection morphogenesis	-2.59	-1.30473	1956,2064,2263,3480,5747,120892	EGFR,ERBB2,FGFR2,IGF1R,PTK2,LRRK2	6/496
6_Member	KEGG Pathway	hsa04144	Endocytosis	-2.27281	-1.02125	1956,2263,3480,4193	EGFR,FGFR2,IGF1R,MDM2	4/252
7_Summary	GO Biological Processes	GO:0007610	behavior	-15.4479	-12.4814	590,706,1956,2908,3061,3356,3620,3643,3784,4985,4986,4988,5594,5663,5743,6335,7068,7442,23385,120892,1128,142,5467,5468,5724,891,983,2932,3791,4170,5599,4193,4780,5747,8864	BCHE,TSPO,EGFR,NR3C1,HCRTR1,HTR2A,IDO1,INSR,KCNQ1,OPRD1,OPRK1,OPRM1,MAPK1,PSEN1,PTGS2,SCN9A,THRB,TRPV1,NCSTN,LRRK2,CHRM1,PARP1,PPARD,PPARG,PTAFR,CCNB1,CDK1,GSK3B,KDR,MCL1,MAPK8,MDM2,NFE2L2,PTK2,PER2	35/-
7_Member	GO Biological Processes	GO:0007610	behavior	-15.4479	-12.4814	590,706,1956,2908,3061,3356,3620,3643,3784,4985,4986,4988,5594,5663,5743,6335,7068,7442,23385,120892	BCHE,TSPO,EGFR,NR3C1,HCRTR1,HTR2A,IDO1,INSR,KCNQ1,OPRD1,OPRK1,OPRM1,MAPK1,PSEN1,PTGS2,SCN9A,THRB,TRPV1,NCSTN,LRRK2	20/618
7_Member	GO Biological Processes	GO:0050890	cognition	-7.6749	-5.70476	590,1128,1956,3356,3643,4986,5594,5663,5743,23385	BCHE,CHRM1,EGFR,HTR2A,INSR,OPRK1,MAPK1,PSEN1,PTGS2,NCSTN	10/321
7_Member	GO Biological Processes	GO:0062012	regulation of small molecule metabolic process	-7.53716	-5.58313	142,706,2908,3356,3643,5467,5468,5663,5724,5743	PARP1,TSPO,NR3C1,HTR2A,INSR,PPARD,PPARG,PSEN1,PTAFR,PTGS2	10/332
7_Member	GO Biological Processes	GO:0007611	learning or memory	-7.1055	-5.20438	590,1956,3356,3643,4986,5594,5663,5743,23385	BCHE,EGFR,HTR2A,INSR,OPRK1,MAPK1,PSEN1,PTGS2,NCSTN	9/277
7_Member	GO Biological Processes	GO:0062013	positive regulation of small molecule metabolic process	-6.8055	-4.93878	3356,3643,5467,5468,5663,5724,5743	HTR2A,INSR,PPARD,PPARG,PSEN1,PTAFR,PTGS2	7/144
7_Member	GO Biological Processes	GO:1903578	regulation of ATP metabolic process	-5.75826	-4.03375	142,706,3356,3643,5663	PARP1,TSPO,HTR2A,INSR,PSEN1	5/72
7_Member	GO Biological Processes	GO:0043467	regulation of generation of precursor metabolites and energy	-5.58123	-3.88868	891,983,2932,3356,3643,5663	CCNB1,CDK1,GSK3B,HTR2A,INSR,PSEN1	6/140
7_Member	GO Biological Processes	GO:0031329	regulation of cellular catabolic process	-5.28522	-3.64436	706,2932,3356,3643,3791,4170,5599,5663,120892	TSPO,GSK3B,HTR2A,INSR,KDR,MCL1,MAPK8,PSEN1,LRRK2	9/459
7_Member	GO Biological Processes	GO:1900542	regulation of purine nucleotide metabolic process	-5.25451	-3.62044	142,706,3356,3643,5663	PARP1,TSPO,HTR2A,INSR,PSEN1	5/91
7_Member	GO Biological Processes	GO:0006140	regulation of nucleotide metabolic process	-5.23118	-3.60267	142,706,3356,3643,5663	PARP1,TSPO,HTR2A,INSR,PSEN1	5/92
7_Member	GO Biological Processes	GO:0006109	regulation of carbohydrate metabolic process	-4.89974	-3.31193	2908,2932,3356,3643,5663,5724	NR3C1,GSK3B,HTR2A,INSR,PSEN1,PTAFR	6/184
7_Member	GO Biological Processes	GO:0030813	positive regulation of nucleotide catabolic process	-4.58051	-3.04737	3356,3643,5663	HTR2A,INSR,PSEN1	3/21
7_Member	GO Biological Processes	GO:0033123	positive regulation of purine nucleotide catabolic process	-4.58051	-3.04737	3356,3643,5663	HTR2A,INSR,PSEN1	3/21
7_Member	GO Biological Processes	GO:0045821	positive regulation of glycolytic process	-4.58051	-3.04737	3356,3643,5663	HTR2A,INSR,PSEN1	3/21
7_Member	GO Biological Processes	GO:0031331	positive regulation of cellular catabolic process	-4.4189	-2.90533	2932,3356,3643,3791,5663,120892	GSK3B,HTR2A,INSR,KDR,PSEN1,LRRK2	6/224
7_Member	GO Biological Processes	GO:0009896	positive regulation of catabolic process	-4.24117	-2.75955	2932,3356,3643,3791,4193,4780,5663,5747,120892	GSK3B,HTR2A,INSR,KDR,MDM2,NFE2L2,PSEN1,PTK2,LRRK2	9/623
7_Member	GO Biological Processes	GO:0045913	positive regulation of carbohydrate metabolic process	-4.15397	-2.68173	3356,3643,5663,5724	HTR2A,INSR,PSEN1,PTAFR	4/79
7_Member	GO Biological Processes	GO:0007612	learning	-4.13796	-2.66803	590,3356,3643,4986,5743	BCHE,HTR2A,INSR,OPRK1,PTGS2	5/155
7_Member	GO Biological Processes	GO:0051952	regulation of amine transport	-4.07018	-2.60655	3356,4986,5663,8864	HTR2A,OPRK1,PSEN1,PER2	4/83
7_Member	GO Biological Processes	GO:1903580	positive regulation of ATP metabolic process	-4.01843	-2.55989	3356,3643,5663	HTR2A,INSR,PSEN1	3/32
7_Member	GO Biological Processes	GO:0045981	positive regulation of nucleotide metabolic process	-3.79298	-2.36219	3356,3643,5663	HTR2A,INSR,PSEN1	3/38
7_Member	GO Biological Processes	GO:1900544	positive regulation of purine nucleotide metabolic process	-3.79298	-2.36219	3356,3643,5663	HTR2A,INSR,PSEN1	3/38
7_Member	GO Biological Processes	GO:0043255	regulation of carbohydrate biosynthetic process	-3.73989	-2.31537	2908,2932,3643,5724	NR3C1,GSK3B,INSR,PTAFR	4/101
7_Member	GO Biological Processes	GO:0006110	regulation of glycolytic process	-3.38686	-2.00909	3356,3643,5663	HTR2A,INSR,PSEN1	3/52
7_Member	GO Biological Processes	GO:0030811	regulation of nucleotide catabolic process	-3.38686	-2.00909	3356,3643,5663	HTR2A,INSR,PSEN1	3/52
7_Member	GO Biological Processes	GO:0033121	regulation of purine nucleotide catabolic process	-3.38686	-2.00909	3356,3643,5663	HTR2A,INSR,PSEN1	3/52
7_Member	GO Biological Processes	GO:0007613	memory	-3.38634	-2.00903	3356,3643,5663,5743	HTR2A,INSR,PSEN1,PTGS2	4/125
7_Member	GO Biological Processes	GO:0043470	regulation of carbohydrate catabolic process	-3.14186	-1.79383	3356,3643,5663	HTR2A,INSR,PSEN1	3/63
8_Summary	GO Biological Processes	GO:0070201	regulation of establishment of protein localization	-15.383	-12.4342	43,240,983,1128,1131,1432,1956,2064,2932,3717,3741,3753,4193,4988,5468,5663,5743,8864,120892,142,3716,7297,590,1129,3356,5594,23385,3738	ACHE,ALOX5,CDK1,CHRM1,CHRM3,MAPK14,EGFR,ERBB2,GSK3B,JAK2,KCNA5,KCNE1,MDM2,OPRM1,PPARG,PSEN1,PTGS2,PER2,LRRK2,PARP1,JAK1,TYK2,BCHE,CHRM2,HTR2A,MAPK1,NCSTN,KCNA3	28/-
8_Member	GO Biological Processes	GO:0070201	regulation of establishment of protein localization	-15.383	-12.4342	43,240,983,1128,1131,1432,1956,2064,2932,3717,3741,3753,4193,4988,5468,5663,5743,8864,120892	ACHE,ALOX5,CDK1,CHRM1,CHRM3,MAPK14,EGFR,ERBB2,GSK3B,JAK2,KCNA5,KCNE1,MDM2,OPRM1,PPARG,PSEN1,PTGS2,PER2,LRRK2	19/536
8_Member	GO Biological Processes	GO:0051223	regulation of protein transport	-13.1505	-10.4271	43,240,983,1128,1131,1432,1956,2932,3717,3741,4193,4988,5468,5663,5743,8864	ACHE,ALOX5,CDK1,CHRM1,CHRM3,MAPK14,EGFR,GSK3B,JAK2,KCNA5,MDM2,OPRM1,PPARG,PSEN1,PTGS2,PER2	16/438
8_Member	GO Biological Processes	GO:1903829	positive regulation of protein localization	-12.4741	-9.8263	43,142,983,1128,1131,1432,1956,2064,2932,3716,3717,4193,5468,5663,5743,7297	ACHE,PARP1,CDK1,CHRM1,CHRM3,MAPK14,EGFR,ERBB2,GSK3B,JAK1,JAK2,MDM2,PPARG,PSEN1,PTGS2,TYK2	16/485
8_Member	GO Biological Processes	GO:0051222	positive regulation of protein transport	-11.2575	-8.81454	43,983,1128,1131,1432,1956,2932,3717,4193,5468,5663,5743	ACHE,CDK1,CHRM1,CHRM3,MAPK14,EGFR,GSK3B,JAK2,MDM2,PPARG,PSEN1,PTGS2	12/252
8_Member	GO Biological Processes	GO:1904951	positive regulation of establishment of protein localization	-11.165	-8.73209	43,983,1128,1131,1432,1956,2064,2932,3717,4193,5468,5663,5743	ACHE,CDK1,CHRM1,CHRM3,MAPK14,EGFR,ERBB2,GSK3B,JAK2,MDM2,PPARG,PSEN1,PTGS2	13/328
8_Member	GO Biological Processes	GO:1900182	positive regulation of protein localization to nucleus	-9.68482	-7.4453	142,983,1432,3716,3717,5663,5743,7297	PARP1,CDK1,MAPK14,JAK1,JAK2,PSEN1,PTGS2,TYK2	8/93
8_Member	GO Biological Processes	GO:1900180	regulation of protein localization to nucleus	-9.6145	-7.37836	142,983,1432,2932,3716,3717,5663,5743,7297	PARP1,CDK1,MAPK14,GSK3B,JAK1,JAK2,PSEN1,PTGS2,TYK2	9/143
8_Member	GO Biological Processes	GO:0090316	positive regulation of intracellular protein transport	-9.5731	-7.34695	983,1128,1432,2932,3717,4193,5663,5743	CDK1,CHRM1,MAPK14,GSK3B,JAK2,MDM2,PSEN1,PTGS2	8/96
8_Member	GO Biological Processes	GO:0046824	positive regulation of nucleocytoplasmic transport	-9.32618	-7.14082	983,1432,2932,3717,4193,5663,5743	CDK1,MAPK14,GSK3B,JAK2,MDM2,PSEN1,PTGS2	7/63
8_Member	GO Biological Processes	GO:0050804	modulation of chemical synaptic transmission	-8.95436	-6.81176	43,590,1128,1129,1956,2932,3356,3717,5594,5663,5743,23385,120892	ACHE,BCHE,CHRM1,CHRM2,EGFR,GSK3B,HTR2A,JAK2,MAPK1,PSEN1,PTGS2,NCSTN,LRRK2	13/496
8_Member	GO Biological Processes	GO:0099177	regulation of trans-synaptic signaling	-8.9438	-6.8049	43,590,1128,1129,1956,2932,3356,3717,5594,5663,5743,23385,120892	ACHE,BCHE,CHRM1,CHRM2,EGFR,GSK3B,HTR2A,JAK2,MAPK1,PSEN1,PTGS2,NCSTN,LRRK2	13/497
8_Member	GO Biological Processes	GO:0032386	regulation of intracellular transport	-8.38874	-6.33648	983,1128,1432,2932,3717,4193,5594,5663,5743,120892	CDK1,CHRM1,MAPK14,GSK3B,JAK2,MDM2,MAPK1,PSEN1,PTGS2,LRRK2	10/270
8_Member	GO Biological Processes	GO:0032388	positive regulation of intracellular transport	-8.23882	-6.20072	983,1128,1432,2932,3717,4193,5663,5743	CDK1,CHRM1,MAPK14,GSK3B,JAK2,MDM2,PSEN1,PTGS2	8/141
8_Member	GO Biological Processes	GO:0033157	regulation of intracellular protein transport	-8.0272	-6.02289	983,1128,1432,2932,3717,4193,5663,5743	CDK1,CHRM1,MAPK14,GSK3B,JAK2,MDM2,PSEN1,PTGS2	8/150
8_Member	GO Biological Processes	GO:0046822	regulation of nucleocytoplasmic transport	-7.4777	-5.53581	983,1432,2932,3717,4193,5663,5743	CDK1,MAPK14,GSK3B,JAK2,MDM2,PSEN1,PTGS2	7/115
8_Member	GO Biological Processes	GO:0042307	positive regulation of protein import into nucleus	-7.05575	-5.15773	983,1432,3717,5663,5743	CDK1,MAPK14,JAK2,PSEN1,PTGS2	5/40
8_Member	GO Biological Processes	GO:0042306	regulation of protein import into nucleus	-6.19236	-4.40434	983,1432,3717,5663,5743	CDK1,MAPK14,JAK2,PSEN1,PTGS2	5/59
8_Member	GO Cellular Components	GO:0098978	glutamatergic synapse	-5.56415	-3.87649	1128,1129,1432,2932,3356,3717,3738,5663,120892	CHRM1,CHRM2,MAPK14,GSK3B,HTR2A,JAK2,KCNA3,PSEN1,LRRK2	9/424
9_Summary	GO Biological Processes	GO:0010817	regulation of hormone levels	-15.3096	-12.3778	231,240,590,706,1131,1513,1585,1586,1956,2099,2260,2908,3480,3717,3741,3784,4986,5468,8864,43,3356,4988,5724,120892,2064,5747,6331	AKR1B1,ALOX5,BCHE,TSPO,CHRM3,CTSK,CYP11B2,CYP17A1,EGFR,ESR1,FGFR1,NR3C1,IGF1R,JAK2,KCNA5,KCNQ1,OPRK1,PPARG,PER2,ACHE,HTR2A,OPRM1,PTAFR,LRRK2,ERBB2,PTK2,SCN5A	27/-
9_Member	GO Biological Processes	GO:0010817	regulation of hormone levels	-15.3096	-12.3778	231,240,590,706,1131,1513,1585,1586,1956,2099,2260,2908,3480,3717,3741,3784,4986,5468,8864	AKR1B1,ALOX5,BCHE,TSPO,CHRM3,CTSK,CYP11B2,CYP17A1,EGFR,ESR1,FGFR1,NR3C1,IGF1R,JAK2,KCNA5,KCNQ1,OPRK1,PPARG,PER2	19/541
9_Member	GO Biological Processes	GO:0051046	regulation of secretion	-11.0062	-8.58892	43,240,706,1131,1956,2260,3356,3717,3741,3784,4986,4988,5468,5724,8864,120892	ACHE,ALOX5,TSPO,CHRM3,EGFR,FGFR1,HTR2A,JAK2,KCNA5,KCNQ1,OPRK1,OPRM1,PPARG,PTAFR,PER2,LRRK2	16/607
9_Member	GO Biological Processes	GO:1903530	regulation of secretion by cell	-10.5018	-8.15941	43,240,706,1131,1956,2260,3356,3717,3741,4986,4988,5468,5724,8864,120892	ACHE,ALOX5,TSPO,CHRM3,EGFR,FGFR1,HTR2A,JAK2,KCNA5,OPRK1,OPRM1,PPARG,PTAFR,PER2,LRRK2	15/553
9_Member	GO Biological Processes	GO:0046883	regulation of hormone secretion	-8.62683	-6.53538	240,706,1131,1956,2260,3717,3741,4986,5468,8864	ALOX5,TSPO,CHRM3,EGFR,FGFR1,JAK2,KCNA5,OPRK1,PPARG,PER2	10/255
9_Member	GO Biological Processes	GO:0050708	regulation of protein secretion	-7.25561	-5.33702	43,240,1131,1956,3717,3741,4988,5468,8864	ACHE,ALOX5,CHRM3,EGFR,JAK2,KCNA5,OPRM1,PPARG,PER2	9/266
9_Member	GO Biological Processes	GO:1903532	positive regulation of secretion by cell	-5.82104	-4.08391	43,1131,1956,2260,3717,4986,5468,5724	ACHE,CHRM3,EGFR,FGFR1,JAK2,OPRK1,PPARG,PTAFR	8/291
9_Member	GO Biological Processes	GO:0051047	positive regulation of secretion	-5.58614	-3.89263	43,1131,1956,2260,3717,4986,5468,5724	ACHE,CHRM3,EGFR,FGFR1,JAK2,OPRK1,PPARG,PTAFR	8/313
9_Member	GO Biological Processes	GO:0090276	regulation of peptide hormone secretion	-4.71947	-3.15962	240,1131,1956,3717,3741,8864	ALOX5,CHRM3,EGFR,JAK2,KCNA5,PER2	6/198
9_Member	GO Biological Processes	GO:0002791	regulation of peptide secretion	-4.68265	-3.13111	240,1131,1956,3717,3741,8864	ALOX5,CHRM3,EGFR,JAK2,KCNA5,PER2	6/201
9_Member	GO Biological Processes	GO:0090087	regulation of peptide transport	-4.68265	-3.13111	240,1131,1956,3717,3741,8864	ALOX5,CHRM3,EGFR,JAK2,KCNA5,PER2	6/201
9_Member	GO Biological Processes	GO:0046887	positive regulation of hormone secretion	-4.28966	-2.79664	1131,1956,2260,3717,5468	CHRM3,EGFR,FGFR1,JAK2,PPARG	5/144
9_Member	GO Biological Processes	GO:0050714	positive regulation of protein secretion	-4.24708	-2.76001	43,1131,1956,3717,5468	ACHE,CHRM3,EGFR,JAK2,PPARG	5/147
9_Member	GO Biological Processes	GO:0050796	regulation of insulin secretion	-3.97306	-2.52085	240,1131,3717,3741,8864	ALOX5,CHRM3,JAK2,KCNA5,PER2	5/168
9_Member	GO Cellular Components	GO:0048471	perinuclear region of cytoplasm	-2.98329	-1.6494	43,240,1956,2064,3741,5747,6331,8864	ACHE,ALOX5,EGFR,ERBB2,KCNA5,PTK2,SCN5A,PER2	8/741
9_Member	GO Biological Processes	GO:0090277	positive regulation of peptide hormone secretion	-2.43619	-1.16792	1131,1956,3717	CHRM3,EGFR,JAK2	3/111
9_Member	GO Biological Processes	GO:0002793	positive regulation of peptide secretion	-2.41443	-1.14833	1131,1956,3717	CHRM3,EGFR,JAK2	3/113
10_Summary	GO Biological Processes	GO:0031667	response to nutrient levels	-14.8346	-11.935	590,706,1432,1513,1956,3480,3988,4193,4780,5467,5468,5594,5599,5743,7298,7421,7442,120892,983,3356,3784,10060	BCHE,TSPO,MAPK14,CTSK,EGFR,IGF1R,LIPA,MDM2,NFE2L2,PPARD,PPARG,MAPK1,MAPK8,PTGS2,TYMS,VDR,TRPV1,LRRK2,CDK1,HTR2A,KCNQ1,ABCC9	22/-
10_Member	GO Biological Processes	GO:0031667	response to nutrient levels	-14.8346	-11.935	590,706,1432,1513,1956,3480,3988,4193,4780,5467,5468,5594,5599,5743,7298,7421,7442,120892	BCHE,TSPO,MAPK14,CTSK,EGFR,IGF1R,LIPA,MDM2,NFE2L2,PPARD,PPARG,MAPK1,MAPK8,PTGS2,TYMS,VDR,TRPV1,LRRK2	18/490
10_Member	GO Biological Processes	GO:0033273	response to vitamin	-11.7181	-9.20384	590,706,1956,3480,3988,4193,5743,7298,7421	BCHE,TSPO,EGFR,IGF1R,LIPA,MDM2,PTGS2,TYMS,VDR	9/84
10_Member	GO Biological Processes	GO:0007584	response to nutrient	-10.6062	-8.24178	590,706,1956,3480,3988,4193,5468,5743,7298,7421	BCHE,TSPO,EGFR,IGF1R,LIPA,MDM2,PPARG,PTGS2,TYMS,VDR	10/160
10_Member	GO Biological Processes	GO:0009410	response to xenobiotic stimulus	-8.57244	-6.49289	590,706,983,1956,3356,3784,3988,4193,4780,5743,7298,10060	BCHE,TSPO,CDK1,EGFR,HTR2A,KCNQ1,LIPA,MDM2,NFE2L2,PTGS2,TYMS,ABCC9	12/432
10_Member	GO Biological Processes	GO:0048771	tissue remodeling	-3.59765	-2.19392	1513,3988,4193,7421	CTSK,LIPA,MDM2,VDR	4/110
11_Summary	GO Cellular Components	GO:0045121	membrane raft	-14.5817	-11.6973	1956,3356,3480,3643,3717,3738,3741,3753,3784,3791,5594,5663,5743,6331,120892,2064,5664,6335,7297,10060,23385,51107,55851,2260,2263,2932,4986	EGFR,HTR2A,IGF1R,INSR,JAK2,KCNA3,KCNA5,KCNE1,KCNQ1,KDR,MAPK1,PSEN1,PTGS2,SCN5A,LRRK2,ERBB2,PSEN2,SCN9A,TYK2,ABCC9,NCSTN,APH1A,PSENEN,FGFR1,FGFR2,GSK3B,OPRK1	27/-
11_Member	GO Cellular Components	GO:0045121	membrane raft	-14.5817	-11.6973	1956,3356,3480,3643,3717,3738,3741,3753,3784,3791,5594,5663,5743,6331,120892	EGFR,HTR2A,IGF1R,INSR,JAK2,KCNA3,KCNA5,KCNE1,KCNQ1,KDR,MAPK1,PSEN1,PTGS2,SCN5A,LRRK2	15/288
11_Member	GO Cellular Components	GO:0098857	membrane microdomain	-14.5373	-11.6677	1956,3356,3480,3643,3717,3738,3741,3753,3784,3791,5594,5663,5743,6331,120892	EGFR,HTR2A,IGF1R,INSR,JAK2,KCNA3,KCNA5,KCNE1,KCNQ1,KDR,MAPK1,PSEN1,PTGS2,SCN5A,LRRK2	15/290
11_Member	GO Cellular Components	GO:0098797	plasma membrane protein complex	-11.8222	-9.29498	1956,2064,3480,3643,3717,3738,3741,3753,3784,5663,5664,6331,6335,7297,10060,23385,51107,55851	EGFR,ERBB2,IGF1R,INSR,JAK2,KCNA3,KCNA5,KCNE1,KCNQ1,PSEN1,PSEN2,SCN5A,SCN9A,TYK2,ABCC9,NCSTN,APH1A,PSENEN	18/737
11_Member	GO Cellular Components	GO:0005901	caveola	-11.8152	-9.29453	3356,3480,3643,3717,3741,5594,5743,6331,120892	HTR2A,IGF1R,INSR,JAK2,KCNA5,MAPK1,PTGS2,SCN5A,LRRK2	9/82
11_Member	GO Cellular Components	GO:0044853	plasma membrane raft	-10.5362	-8.18944	3356,3480,3643,3717,3741,5594,5743,6331,120892	HTR2A,IGF1R,INSR,JAK2,KCNA5,MAPK1,PTGS2,SCN5A,LRRK2	9/113
11_Member	GO Biological Processes	GO:0060322	head development	-5.79212	-4.06029	1956,2260,2263,2932,3480,3738,3753,5594,5663,6331,23385,120892	EGFR,FGFR1,FGFR2,GSK3B,IGF1R,KCNA3,KCNE1,MAPK1,PSEN1,SCN5A,NCSTN,LRRK2	12/781
11_Member	GO Biological Processes	GO:0030900	forebrain development	-5.69176	-3.97647	1956,2260,2263,2932,3480,3738,5663,6331,120892	EGFR,FGFR1,FGFR2,GSK3B,IGF1R,KCNA3,PSEN1,SCN5A,LRRK2	9/409
11_Member	GO Biological Processes	GO:0007420	brain development	-5.25586	-3.62094	1956,2260,2263,2932,3480,3738,3753,5663,6331,23385,120892	EGFR,FGFR1,FGFR2,GSK3B,IGF1R,KCNA3,KCNE1,PSEN1,SCN5A,NCSTN,LRRK2	11/731
11_Member	GO Biological Processes	GO:0021537	telencephalon development	-4.92395	-3.33234	1956,2932,3480,3738,5663,6331,120892	EGFR,GSK3B,IGF1R,KCNA3,PSEN1,SCN5A,LRRK2	7/276
11_Member	GO Biological Processes	GO:0022037	metencephalon development	-4.72231	-3.16092	3480,3753,5663,6331,23385	IGF1R,KCNE1,PSEN1,SCN5A,NCSTN	5/117
11_Member	GO Cellular Components	GO:0042383	sarcolemma	-4.31859	-2.81882	3480,4986,5663,6331,23385	IGF1R,OPRK1,PSEN1,SCN5A,NCSTN	5/142
11_Member	GO Biological Processes	GO:0030902	hindbrain development	-4.0986	-2.63212	3480,3753,5663,6331,23385	IGF1R,KCNE1,PSEN1,SCN5A,NCSTN	5/158
11_Member	GO Biological Processes	GO:0021549	cerebellum development	-3.64363	-2.23392	3480,5663,6331,23385	IGF1R,PSEN1,SCN5A,NCSTN	4/107
12_Summary	GO Biological Processes	GO:0042391	regulation of membrane potential	-13.9748	-11.1595	142,706,1128,2932,3738,3741,3753,3784,3791,3988,4985,5663,6331,6335,7442,10060,120892,1131,3356,7137,7139,1432,1520,3643,4780,4986,4988,5664,8864,5743,1017,7421,5724,7298,4170,5594,4193,2260,7068,3620,1585,3717	PARP1,TSPO,CHRM1,GSK3B,KCNA3,KCNA5,KCNE1,KCNQ1,KDR,LIPA,OPRD1,PSEN1,SCN5A,SCN9A,TRPV1,ABCC9,LRRK2,CHRM3,HTR2A,TNNI3,TNNT2,MAPK14,CTSS,INSR,NFE2L2,OPRK1,OPRM1,PSEN2,PER2,PTGS2,CDK2,VDR,PTAFR,TYMS,MCL1,MAPK1,MDM2,FGFR1,THRB,IDO1,CYP11B2,JAK2	42/-
12_Member	GO Biological Processes	GO:0042391	regulation of membrane potential	-13.9748	-11.1595	142,706,1128,2932,3738,3741,3753,3784,3791,3988,4985,5663,6331,6335,7442,10060,120892	PARP1,TSPO,CHRM1,GSK3B,KCNA3,KCNA5,KCNE1,KCNQ1,KDR,LIPA,OPRD1,PSEN1,SCN5A,SCN9A,TRPV1,ABCC9,LRRK2	17/465
12_Member	GO Biological Processes	GO:0006936	muscle contraction	-10.2489	-7.93992	1131,3356,3741,3753,3784,6331,6335,7137,7139,7442,10060	CHRM3,HTR2A,KCNA5,KCNE1,KCNQ1,SCN5A,SCN9A,TNNI3,TNNT2,TRPV1,ABCC9	11/236
12_Member	GO Biological Processes	GO:0060048	cardiac muscle contraction	-10.0871	-7.79727	3741,3753,3784,6331,6335,7137,7139,10060	KCNA5,KCNE1,KCNQ1,SCN5A,SCN9A,TNNI3,TNNT2,ABCC9	8/83
12_Member	GO Biological Processes	GO:0060047	heart contraction	-9.46505	-7.25186	3741,3753,3784,6331,6335,7137,7139,10060	KCNA5,KCNE1,KCNQ1,SCN5A,SCN9A,TNNI3,TNNT2,ABCC9	8/99
12_Member	GO Biological Processes	GO:0003012	muscle system process	-9.21893	-7.05972	1131,3356,3741,3753,3784,6331,6335,7137,7139,7442,10060	CHRM3,HTR2A,KCNA5,KCNE1,KCNQ1,SCN5A,SCN9A,TNNI3,TNNT2,TRPV1,ABCC9	11/295
12_Member	GO Biological Processes	GO:0034762	regulation of transmembrane transport	-9.0075	-6.85668	1131,1432,1520,3643,3753,3784,4780,4986,4988,5663,5664,6331,8864	CHRM3,MAPK14,CTSS,INSR,KCNE1,KCNQ1,NFE2L2,OPRK1,OPRM1,PSEN1,PSEN2,SCN5A,PER2	13/491
12_Member	GO Biological Processes	GO:0003015	heart process	-9.00308	-6.85502	3741,3753,3784,6331,6335,7137,7139,10060	KCNA5,KCNE1,KCNQ1,SCN5A,SCN9A,TNNI3,TNNT2,ABCC9	8/113
12_Member	GO Biological Processes	GO:0006941	striated muscle contraction	-8.79448	-6.67564	3741,3753,3784,6331,6335,7137,7139,10060	KCNA5,KCNE1,KCNQ1,SCN5A,SCN9A,TNNI3,TNNT2,ABCC9	8/120
12_Member	GO Biological Processes	GO:0070252	actin-mediated cell contraction	-8.74198	-6.63125	3741,3753,3784,6331,6335,7139,10060	KCNA5,KCNE1,KCNQ1,SCN5A,SCN9A,TNNT2,ABCC9	7/76
12_Member	GO Biological Processes	GO:0086003	cardiac muscle cell contraction	-8.21286	-6.18552	3741,3753,3784,6331,6335,10060	KCNA5,KCNE1,KCNQ1,SCN5A,SCN9A,ABCC9	6/51
12_Member	GO Biological Processes	GO:0043269	regulation of monoatomic ion transport	-8.17436	-6.14986	706,1128,1520,3356,3741,3753,3784,4985,4986,5664,5743,6331	TSPO,CHRM1,CTSS,HTR2A,KCNA5,KCNE1,KCNQ1,OPRD1,OPRK1,PSEN2,PTGS2,SCN5A	12/469
12_Member	GO Biological Processes	GO:0030048	actin filament-based movement	-7.87028	-5.88339	3741,3753,3784,6331,6335,7139,10060	KCNA5,KCNE1,KCNQ1,SCN5A,SCN9A,TNNT2,ABCC9	7/101
12_Member	GO Biological Processes	GO:0030001	metal ion transport	-7.58977	-5.62506	1017,3356,3738,3741,3753,3784,4988,5663,6331,6335,7421,7442,10060	CDK2,HTR2A,KCNA3,KCNA5,KCNE1,KCNQ1,OPRM1,PSEN1,SCN5A,SCN9A,VDR,TRPV1,ABCC9	13/646
12_Member	GO Molecular Functions	GO:0005261	monoatomic cation channel activity	-7.50046	-5.55513	3738,3741,3753,3784,4988,5663,6331,6335,7442,10060	KCNA3,KCNA5,KCNE1,KCNQ1,OPRM1,PSEN1,SCN5A,SCN9A,TRPV1,ABCC9	10/335
12_Member	GO Biological Processes	GO:0001508	action potential	-7.22728	-5.31031	3738,3741,3753,3784,6331,6335,10060	KCNA3,KCNA5,KCNE1,KCNQ1,SCN5A,SCN9A,ABCC9	7/125
12_Member	GO Biological Processes	GO:0046683	response to organophosphorus	-7.10997	-5.20729	3753,3784,5724,5743,7298,7442,10060	KCNE1,KCNQ1,PTAFR,PTGS2,TYMS,TRPV1,ABCC9	7/130
12_Member	GO Biological Processes	GO:0034764	positive regulation of transmembrane transport	-6.89244	-5.0111	1432,1520,3643,3753,3784,4780,4986,5663	MAPK14,CTSS,INSR,KCNE1,KCNQ1,NFE2L2,OPRK1,PSEN1	8/210
12_Member	GO Molecular Functions	GO:0015267	channel activity	-6.84485	-4.96942	3738,3741,3753,3784,4170,4988,5663,6331,6335,7442,10060	KCNA3,KCNA5,KCNE1,KCNQ1,MCL1,OPRM1,PSEN1,SCN5A,SCN9A,TRPV1,ABCC9	11/502
12_Member	GO Molecular Functions	GO:0022803	passive transmembrane transporter activity	-6.83621	-4.96516	3738,3741,3753,3784,4170,4988,5663,6331,6335,7442,10060	KCNA3,KCNA5,KCNE1,KCNQ1,MCL1,OPRM1,PSEN1,SCN5A,SCN9A,TRPV1,ABCC9	11/503
12_Member	GO Molecular Functions	GO:0022843	voltage-gated monoatomic cation channel activity	-6.8055	-4.93878	3738,3741,3753,3784,4988,7442,10060	KCNA3,KCNA5,KCNE1,KCNQ1,OPRM1,TRPV1,ABCC9	7/144
12_Member	GO Biological Processes	GO:0010959	regulation of metal ion transport	-6.79361	-4.92928	706,3356,3741,3753,3784,4985,4986,5664,5743,6331	TSPO,HTR2A,KCNA5,KCNE1,KCNQ1,OPRD1,OPRK1,PSEN2,PTGS2,SCN5A	10/399
12_Member	GO Biological Processes	GO:0086002	cardiac muscle cell action potential involved in contraction	-6.79171	-4.92928	3741,3753,3784,6331,6335	KCNA5,KCNE1,KCNQ1,SCN5A,SCN9A	5/45
12_Member	KEGG Pathway	hsa04261	Adrenergic signaling in cardiomyocytes	-6.6068	-4.75976	1432,3753,3784,5594,6331,7137,7139	MAPK14,KCNE1,KCNQ1,MAPK1,SCN5A,TNNI3,TNNT2	7/154
12_Member	GO Biological Processes	GO:0006812	monoatomic cation transport	-6.59435	-4.74869	1017,3356,3738,3741,3753,3784,4988,5663,6331,6335,7421,7442,10060	CDK2,HTR2A,KCNA3,KCNA5,KCNE1,KCNQ1,OPRM1,PSEN1,SCN5A,SCN9A,VDR,TRPV1,ABCC9	13/788
12_Member	GO Molecular Functions	GO:0005216	monoatomic ion channel activity	-6.39489	-4.57191	3738,3741,3753,3784,4988,5663,6331,6335,7442,10060	KCNA3,KCNA5,KCNE1,KCNQ1,OPRM1,PSEN1,SCN5A,SCN9A,TRPV1,ABCC9	10/441
12_Member	GO Biological Processes	GO:0002027	regulation of heart rate	-6.33799	-4.53159	3741,3753,3784,4193,6331,7442	KCNA5,KCNE1,KCNQ1,MDM2,SCN5A,TRPV1	6/104
12_Member	GO Molecular Functions	GO:0046873	metal ion transmembrane transporter activity	-6.33257	-4.52867	3738,3741,3753,3784,4988,5663,6331,6335,7442,10060	KCNA3,KCNA5,KCNE1,KCNQ1,OPRM1,PSEN1,SCN5A,SCN9A,TRPV1,ABCC9	10/448
12_Member	GO Biological Processes	GO:0086001	cardiac muscle cell action potential	-6.30701	-4.50807	3741,3753,3784,6331,6335	KCNA5,KCNE1,KCNQ1,SCN5A,SCN9A	5/56
12_Member	GO Molecular Functions	GO:0005244	voltage-gated monoatomic ion channel activity	-6.28174	-4.48525	3738,3741,3753,3784,4988,7442,10060	KCNA3,KCNA5,KCNE1,KCNQ1,OPRM1,TRPV1,ABCC9	7/172
12_Member	GO Molecular Functions	GO:0022832	voltage-gated channel activity	-6.26477	-4.4695	3738,3741,3753,3784,4988,7442,10060	KCNA3,KCNA5,KCNE1,KCNQ1,OPRM1,TRPV1,ABCC9	7/173
12_Member	GO Biological Processes	GO:0098660	inorganic ion transmembrane transport	-6.07264	-4.30226	3356,3738,3741,3753,3784,4988,5663,6331,6335,7421,7442,10060	HTR2A,KCNA3,KCNA5,KCNE1,KCNQ1,OPRM1,PSEN1,SCN5A,SCN9A,VDR,TRPV1,ABCC9	12/734
12_Member	GO Biological Processes	GO:0050954	sensory perception of mechanical stimulus	-6.05327	-4.28518	2260,3356,3753,3784,6335,7068,7442	FGFR1,HTR2A,KCNE1,KCNQ1,SCN9A,THRB,TRPV1	7/186
12_Member	GO Molecular Functions	GO:0005251	delayed rectifier potassium channel activity	-5.97292	-4.21949	3738,3741,3753,3784	KCNA3,KCNA5,KCNE1,KCNQ1	4/28
12_Member	GO Biological Processes	GO:0060372	regulation of atrial cardiac muscle cell membrane repolarization	-5.94487	-4.19693	3741,3784,6331	KCNA5,KCNQ1,SCN5A	3/8
12_Member	GO Biological Processes	GO:0061337	cardiac conduction	-5.91455	-4.16879	3741,3753,3784,6331,10060	KCNA5,KCNE1,KCNQ1,SCN5A,ABCC9	5/67
12_Member	GO Biological Processes	GO:0099623	regulation of cardiac muscle cell membrane repolarization	-5.84815	-4.10995	3741,3753,3784,6331	KCNA5,KCNE1,KCNQ1,SCN5A	4/30
12_Member	GO Biological Processes	GO:0098662	inorganic cation transmembrane transport	-5.81416	-4.07916	3356,3738,3741,3753,3784,4988,5663,6331,6335,7442,10060	HTR2A,KCNA3,KCNA5,KCNE1,KCNQ1,OPRM1,PSEN1,SCN5A,SCN9A,TRPV1,ABCC9	11/639
12_Member	GO Biological Processes	GO:0043270	positive regulation of monoatomic ion transport	-5.72933	-4.01005	706,1128,1520,3753,3784,4986,6331	TSPO,CHRM1,CTSS,KCNE1,KCNQ1,OPRK1,SCN5A	7/208
12_Member	GO Biological Processes	GO:0098655	monoatomic cation transmembrane transport	-5.71696	-3.99965	3356,3738,3741,3753,3784,4988,5663,6331,6335,7442,10060	HTR2A,KCNA3,KCNA5,KCNE1,KCNQ1,OPRM1,PSEN1,SCN5A,SCN9A,TRPV1,ABCC9	11/654
12_Member	GO Molecular Functions	GO:0044325	transmembrane transporter binding	-5.65434	-3.94611	706,3753,3784,6331,10060,120892	TSPO,KCNE1,KCNQ1,SCN5A,ABCC9,LRRK2	6/136
12_Member	GO Biological Processes	GO:0014074	response to purine-containing compound	-5.49292	-3.81365	3753,3784,5724,5743,7442,10060	KCNE1,KCNQ1,PTAFR,PTGS2,TRPV1,ABCC9	6/145
12_Member	GO Cellular Components	GO:0034703	cation channel complex	-5.46559	-3.7928	3738,3741,3753,3784,6331,6335,10060	KCNA3,KCNA5,KCNE1,KCNQ1,SCN5A,SCN9A,ABCC9	7/228
12_Member	GO Biological Processes	GO:0086091	regulation of heart rate by cardiac conduction	-5.33424	-3.68299	3741,3753,3784,6331	KCNA5,KCNE1,KCNQ1,SCN5A	4/40
12_Member	GO Biological Processes	GO:0060306	regulation of membrane repolarization	-5.29057	-3.64885	3741,3753,3784,6331	KCNA5,KCNE1,KCNQ1,SCN5A	4/41
12_Member	GO Cellular Components	GO:0043292	contractile muscle fiber	-5.20317	-3.57908	3620,3741,3753,6331,7137,7139,10060	IDO1,KCNA5,KCNE1,SCN5A,TNNI3,TNNT2,ABCC9	7/250
12_Member	GO Molecular Functions	GO:0022890	inorganic cation transmembrane transporter activity	-5.13735	-3.52123	3738,3741,3753,3784,4988,5663,6331,6335,7442,10060	KCNA3,KCNA5,KCNE1,KCNQ1,OPRM1,PSEN1,SCN5A,SCN9A,TRPV1,ABCC9	10/610
12_Member	GO Biological Processes	GO:0086014	atrial cardiac muscle cell action potential	-5.13717	-3.52123	3741,3784,6331	KCNA5,KCNQ1,SCN5A	3/14
12_Member	GO Biological Processes	GO:0086026	atrial cardiac muscle cell to AV node cell signaling	-5.13717	-3.52123	3741,3784,6331	KCNA5,KCNQ1,SCN5A	3/14
12_Member	GO Molecular Functions	GO:0005249	voltage-gated potassium channel activity	-5.07508	-3.46555	3738,3741,3753,3784,10060	KCNA3,KCNA5,KCNE1,KCNQ1,ABCC9	5/99
12_Member	GO Molecular Functions	GO:0086008	voltage-gated potassium channel activity involved in cardiac muscle cell action potential repolarization	-5.04113	-3.43635	3741,3753,3784	KCNA5,KCNE1,KCNQ1	3/15
12_Member	GO Biological Processes	GO:0086066	atrial cardiac muscle cell to AV node cell communication	-5.04113	-3.43635	3741,3784,6331	KCNA5,KCNQ1,SCN5A	3/15
12_Member	GO Biological Processes	GO:0097623	potassium ion export across plasma membrane	-5.04113	-3.43635	3741,3753,3784	KCNA5,KCNE1,KCNQ1	3/15
12_Member	GO Cellular Components	GO:0034705	potassium channel complex	-5.03264	-3.43021	3738,3741,3753,3784,10060	KCNA3,KCNA5,KCNE1,KCNQ1,ABCC9	5/101
12_Member	GO Biological Processes	GO:0043266	regulation of potassium ion transport	-5.03264	-3.43021	3356,3741,3753,3784,4986	HTR2A,KCNA5,KCNE1,KCNQ1,OPRK1	5/101
12_Member	GO Molecular Functions	GO:0008324	monoatomic cation transmembrane transporter activity	-4.91564	-3.32479	3738,3741,3753,3784,4988,5663,6331,6335,7442,10060	KCNA3,KCNA5,KCNE1,KCNQ1,OPRM1,PSEN1,SCN5A,SCN9A,TRPV1,ABCC9	10/647
12_Member	GO Biological Processes	GO:0006813	potassium ion transport	-4.89974	-3.31193	1017,3738,3741,3753,3784,10060	CDK2,KCNA3,KCNA5,KCNE1,KCNQ1,ABCC9	6/184
12_Member	GO Biological Processes	GO:0086013	membrane repolarization during cardiac muscle cell action potential	-4.64659	-3.10179	3741,3753,3784	KCNA5,KCNE1,KCNQ1	3/20
12_Member	GO Biological Processes	GO:0099622	cardiac muscle cell membrane repolarization	-4.64659	-3.10179	3741,3753,3784	KCNA5,KCNE1,KCNQ1	3/20
12_Member	GO Molecular Functions	GO:0005267	potassium channel activity	-4.60056	-3.06205	3738,3741,3753,3784,10060	KCNA3,KCNA5,KCNE1,KCNQ1,ABCC9	5/124
12_Member	GO Biological Processes	GO:0086005	ventricular cardiac muscle cell action potential	-4.58051	-3.04737	3753,3784,6331	KCNE1,KCNQ1,SCN5A	3/21
12_Member	GO Biological Processes	GO:0086011	membrane repolarization during action potential	-4.58051	-3.04737	3741,3753,3784	KCNA5,KCNE1,KCNQ1	3/21
12_Member	GO Molecular Functions	GO:0022836	gated channel activity	-4.52936	-3.00086	3738,3741,3753,3784,4988,7442,10060	KCNA3,KCNA5,KCNE1,KCNQ1,OPRM1,TRPV1,ABCC9	7/318
12_Member	GO Cellular Components	GO:0030017	sarcomere	-4.47363	-2.95103	3741,3753,6331,7137,7139,10060	KCNA5,KCNE1,SCN5A,TNNI3,TNNT2,ABCC9	6/219
12_Member	GO Molecular Functions	GO:0015318	inorganic molecular entity transmembrane transporter activity	-4.44853	-2.93239	3738,3741,3753,3784,4988,5663,6331,6335,7442,10060	KCNA3,KCNA5,KCNE1,KCNQ1,OPRM1,PSEN1,SCN5A,SCN9A,TRPV1,ABCC9	10/734
12_Member	GO Biological Processes	GO:0060307	regulation of ventricular cardiac muscle cell membrane repolarization	-4.34611	-2.84386	3753,3784,6331	KCNE1,KCNQ1,SCN5A	3/25
12_Member	GO Molecular Functions	GO:0015075	monoatomic ion transmembrane transporter activity	-4.29788	-2.80119	3738,3741,3753,3784,4988,5663,6331,6335,7442,10060	KCNA3,KCNA5,KCNE1,KCNQ1,OPRM1,PSEN1,SCN5A,SCN9A,TRPV1,ABCC9	10/765
12_Member	GO Biological Processes	GO:0086009	membrane repolarization	-4.29373	-2.8001	3741,3753,3784	KCNA5,KCNE1,KCNQ1	3/26
12_Member	GO Cellular Components	GO:0030016	myofibril	-4.25242	-2.76242	3741,3753,6331,7137,7139,10060	KCNA5,KCNE1,SCN5A,TNNI3,TNNT2,ABCC9	6/240
12_Member	GO Molecular Functions	GO:0015271	outward rectifier potassium channel activity	-4.24345	-2.76001	3738,3741,3784	KCNA3,KCNA5,KCNQ1	3/27
12_Member	GO Biological Processes	GO:0086019	cell-cell signaling involved in cardiac conduction	-4.24345	-2.76001	3741,3784,6331	KCNA5,KCNQ1,SCN5A	3/27
12_Member	GO Cellular Components	GO:0034702	monoatomic ion channel complex	-4.14439	-2.6733	3738,3741,3753,3784,6331,6335,10060	KCNA3,KCNA5,KCNE1,KCNQ1,SCN5A,SCN9A,ABCC9	7/366
12_Member	GO Molecular Functions	GO:0015079	potassium ion transmembrane transporter activity	-4.07282	-2.60805	3738,3741,3753,3784,10060	KCNA3,KCNA5,KCNE1,KCNQ1,ABCC9	5/160
12_Member	GO Biological Processes	GO:0071805	potassium ion transmembrane transport	-3.98524	-2.52838	3738,3741,3753,3784,10060	KCNA3,KCNA5,KCNE1,KCNQ1,ABCC9	5/167
12_Member	GO Biological Processes	GO:0055075	potassium ion homeostasis	-3.93866	-2.49121	1585,3741,3784	CYP11B2,KCNA5,KCNQ1	3/34
12_Member	GO Cellular Components	GO:0008076	voltage-gated potassium channel complex	-3.9334	-2.4865	3738,3741,3753,3784	KCNA3,KCNA5,KCNE1,KCNQ1	4/90
12_Member	GO Biological Processes	GO:1901381	positive regulation of potassium ion transmembrane transport	-3.82783	-2.39333	3753,3784,4986	KCNE1,KCNQ1,OPRK1	3/37
12_Member	GO Biological Processes	GO:0086065	cell communication involved in cardiac conduction	-3.66265	-2.24992	3741,3784,6331	KCNA5,KCNQ1,SCN5A	3/42
12_Member	GO Biological Processes	GO:1904062	regulation of monoatomic cation transmembrane transport	-3.60137	-2.19616	1520,3753,3784,4986,5664,6331	CTSS,KCNE1,KCNQ1,OPRK1,PSEN2,SCN5A	6/316
12_Member	GO Biological Processes	GO:0043268	positive regulation of potassium ion transport	-3.57321	-2.17343	3753,3784,4986	KCNE1,KCNQ1,OPRK1	3/45
12_Member	GO Biological Processes	GO:0030029	actin filament-based process	-3.48433	-2.09521	3717,3741,3753,3784,6331,6335,7139,10060	JAK2,KCNA5,KCNE1,KCNQ1,SCN5A,SCN9A,TNNT2,ABCC9	8/621
12_Member	GO Biological Processes	GO:0071320	cellular response to cAMP	-3.4118	-2.03026	3753,3784,5724	KCNE1,KCNQ1,PTAFR	3/51
12_Member	GO Biological Processes	GO:0034765	regulation of monoatomic ion transmembrane transport	-3.35888	-1.9839	1520,3753,3784,4986,5664,6331	CTSS,KCNE1,KCNQ1,OPRK1,PSEN2,SCN5A	6/351
12_Member	GO Cellular Components	GO:1902495	transmembrane transporter complex	-3.27722	-1.91141	3738,3741,3753,3784,6331,6335,10060	KCNA3,KCNA5,KCNE1,KCNQ1,SCN5A,SCN9A,ABCC9	7/508
12_Member	GO Biological Processes	GO:1904064	positive regulation of cation transmembrane transport	-3.22429	-1.86299	1520,3753,3784,4986	CTSS,KCNE1,KCNQ1,OPRK1	4/138
12_Member	GO Biological Processes	GO:0140115	export across plasma membrane	-3.2039	-1.84573	3741,3753,3784	KCNA5,KCNE1,KCNQ1	3/60
12_Member	GO Cellular Components	GO:1990351	transporter complex	-3.14481	-1.79416	3738,3741,3753,3784,6331,6335,10060	KCNA3,KCNA5,KCNE1,KCNQ1,SCN5A,SCN9A,ABCC9	7/535
12_Member	GO Biological Processes	GO:0034767	positive regulation of monoatomic ion transmembrane transport	-3.07806	-1.73609	1520,3753,3784,4986	CTSS,KCNE1,KCNQ1,OPRK1	4/151
12_Member	GO Molecular Functions	GO:0097110	scaffold protein binding	-3.00852	-1.6721	3741,3784,6331	KCNA5,KCNQ1,SCN5A	3/70
12_Member	GO Biological Processes	GO:0007605	sensory perception of sound	-2.97466	-1.6412	2260,3753,3784,7068	FGFR1,KCNE1,KCNQ1,THRB	4/161
12_Member	GO Biological Processes	GO:0055117	regulation of cardiac muscle contraction	-2.87249	-1.55271	3784,6331,7137	KCNQ1,SCN5A,TNNI3	3/78
12_Member	GO Biological Processes	GO:1901379	regulation of potassium ion transmembrane transport	-2.7506	-1.44487	3753,3784,4986	KCNE1,KCNQ1,OPRK1	3/86
12_Member	GO Biological Processes	GO:0051591	response to cAMP	-2.73622	-1.43215	3753,3784,5724	KCNE1,KCNQ1,PTAFR	3/87
12_Member	GO Biological Processes	GO:0140352	export from cell	-2.62501	-1.33481	3741,3753,3784,5663,5743,7442	KCNA5,KCNE1,KCNQ1,PSEN1,PTGS2,TRPV1	6/488
12_Member	GO Biological Processes	GO:0006942	regulation of striated muscle contraction	-2.564	-1.28397	3784,6331,7137	KCNQ1,SCN5A,TNNI3	3/100
12_Member	GO Cellular Components	GO:0030018	Z disc	-2.23571	-0.989699	3741,3753,6331	KCNA5,KCNE1,SCN5A	3/131
12_Member	GO Cellular Components	GO:0031674	I band	-2.11445	-0.880331	3741,3753,6331	KCNA5,KCNE1,SCN5A	3/145
13_Summary	KEGG Pathway	hsa04914	Progesterone-mediated oocyte maturation	-13.8518	-11.0491	890,891,983,1017,1432,3480,5241,5594,5599,5602,8900,898,3716,3717,7297,1956,3643,4193,1586,2099,2932,1128,1131,5663,5664,5743,23385,51107,55851,367,240,2064,5747,3791,1513,5468,4780,10280,120892,2260,706,142,8864,1520,7421,23476,7137,5836,3356,7442,4985,1129,5467	CCNA2,CCNB1,CDK1,CDK2,MAPK14,IGF1R,PGR,MAPK1,MAPK8,MAPK10,CCNA1,CCNE1,JAK1,JAK2,TYK2,EGFR,INSR,MDM2,CYP17A1,ESR1,GSK3B,CHRM1,CHRM3,PSEN1,PSEN2,PTGS2,NCSTN,APH1A,PSENEN,AR,ALOX5,ERBB2,PTK2,KDR,CTSK,PPARG,NFE2L2,SIGMAR1,LRRK2,FGFR1,TSPO,PARP1,PER2,CTSS,VDR,BRD4,TNNI3,PYGL,HTR2A,TRPV1,OPRD1,CHRM2,PPARD	53/-
13_Member	KEGG Pathway	hsa04914	Progesterone-mediated oocyte maturation	-13.8518	-11.0491	890,891,983,1017,1432,3480,5241,5594,5599,5602,8900	CCNA2,CCNB1,CDK1,CDK2,MAPK14,IGF1R,PGR,MAPK1,MAPK8,MAPK10,CCNA1	11/111
13_Member	KEGG Pathway	hsa05161	Hepatitis B	-11.9937	-9.45317	890,898,1017,1432,3716,3717,5594,5599,5602,7297,8900	CCNA2,CCNE1,CDK2,MAPK14,JAK1,JAK2,MAPK1,MAPK8,MAPK10,TYK2,CCNA1	11/163
13_Member	KEGG Pathway	hsa04068	FoxO signaling pathway	-11.4088	-8.92561	891,1017,1432,1956,3480,3643,4193,5594,5599,5602	CCNB1,CDK2,MAPK14,EGFR,IGF1R,INSR,MDM2,MAPK1,MAPK8,MAPK10	10/133
13_Member	KEGG Pathway	hsa04917	Prolactin signaling pathway	-10.6445	-8.27553	1432,1586,2099,2932,3717,5594,5599,5602	MAPK14,CYP17A1,ESR1,GSK3B,JAK2,MAPK1,MAPK8,MAPK10	8/71
13_Member	KEGG Pathway	hsa05010	Alzheimer disease	-10.216	-7.91456	1128,1131,2932,3643,5594,5599,5602,5663,5664,5743,23385,51107,55851	CHRM1,CHRM3,GSK3B,INSR,MAPK1,MAPK8,MAPK10,PSEN1,PSEN2,PTGS2,NCSTN,APH1A,PSENEN	13/391
13_Member	KEGG Pathway	hsa04114	Oocyte meiosis	-9.72479	-7.47999	367,891,898,983,1017,1432,3480,5241,5594	AR,CCNB1,CCNE1,CDK1,CDK2,MAPK14,IGF1R,PGR,MAPK1	9/139
13_Member	KEGG Pathway	hsa05169	Epstein-Barr virus infection	-9.5872	-7.35442	890,898,1017,1432,3716,4193,5599,5602,7297,8900	CCNA2,CCNE1,CDK2,MAPK14,JAK1,MDM2,MAPK8,MAPK10,TYK2,CCNA1	10/203
13_Member	KEGG Pathway	hsa05145	Toxoplasmosis	-9.06522	-6.91162	240,1432,3716,3717,5594,5599,5602,7297	ALOX5,MAPK14,JAK1,JAK2,MAPK1,MAPK8,MAPK10,TYK2	8/111
13_Member	KEGG Pathway	hsa05167	Kaposi sarcoma-associated herpesvirus infection	-8.40294	-6.34847	1432,2932,3716,3717,5594,5599,5602,5743,7297	MAPK14,GSK3B,JAK1,JAK2,MAPK1,MAPK8,MAPK10,PTGS2,TYK2	9/196
13_Member	KEGG Pathway	hsa04012	ErbB signaling pathway	-8.36109	-6.31103	1956,2064,2932,5594,5599,5602,5747	EGFR,ERBB2,GSK3B,MAPK1,MAPK8,MAPK10,PTK2	7/86
13_Member	KEGG Pathway	hsa04510	Focal adhesion	-8.26973	-6.2262	1956,2064,2932,3480,3791,5594,5599,5602,5747	EGFR,ERBB2,GSK3B,IGF1R,KDR,MAPK1,MAPK8,MAPK10,PTK2	9/203
13_Member	KEGG Pathway	hsa04380	Osteoclast differentiation	-8.2146	-6.18552	1432,1513,3716,5468,5594,5599,5602,7297	MAPK14,CTSK,JAK1,PPARG,MAPK1,MAPK8,MAPK10,TYK2	8/142
13_Member	KEGG Pathway	hsa04658	Th1 and Th2 cell differentiation	-8.15458	-6.13624	1432,3716,3717,5594,5599,5602,7297	MAPK14,JAK1,JAK2,MAPK1,MAPK8,MAPK10,TYK2	7/92
13_Member	KEGG Pathway	hsa05417	Lipid and atherosclerosis	-8.03494	-6.02468	1432,2932,3717,4780,5468,5594,5599,5602,5747	MAPK14,GSK3B,JAK2,NFE2L2,PPARG,MAPK1,MAPK8,MAPK10,PTK2	9/216
13_Member	KEGG Pathway	hsa05022	Pathways of neurodegeneration - multiple diseases	-8.03271	-6.02444	1128,1131,1432,2932,5594,5599,5602,5663,5664,5743,10280,120892	CHRM1,CHRM3,MAPK14,GSK3B,MAPK1,MAPK8,MAPK10,PSEN1,PSEN2,PTGS2,SIGMAR1,LRRK2	12/483
13_Member	GO Biological Processes	GO:0000165	MAPK cascade	-8.00018	-5.9998	367,983,1432,1956,2260,5594,5599,5602,120892	AR,CDK1,MAPK14,EGFR,FGFR1,MAPK1,MAPK8,MAPK10,LRRK2	9/218
13_Member	KEGG Pathway	hsa05166	Human T-cell leukemia virus 1 infection	-7.91473	-5.92404	706,890,898,1017,3716,5594,5599,5602,8900	TSPO,CCNA2,CCNE1,CDK2,JAK1,MAPK1,MAPK8,MAPK10,CCNA1	9/223
13_Member	KEGG Pathway	hsa04659	Th17 cell differentiation	-7.66721	-5.69889	1432,3716,3717,5594,5599,5602,7297	MAPK14,JAK1,JAK2,MAPK1,MAPK8,MAPK10,TYK2	7/108
13_Member	KEGG Pathway	hsa04620	Toll-like receptor signaling pathway	-7.63935	-5.67284	1432,1513,3716,5594,5599,5602,7297	MAPK14,CTSK,JAK1,MAPK1,MAPK8,MAPK10,TYK2	7/109
13_Member	GO Biological Processes	GO:0042752	regulation of circadian rhythm	-7.50401	-5.55696	142,983,2932,5468,5599,5602,8864	PARP1,CDK1,GSK3B,PPARG,MAPK8,MAPK10,PER2	7/114
13_Member	KEGG Pathway	hsa05152	Tuberculosis	-7.40886	-5.47544	1432,1520,3716,3717,5594,5599,5602,7421	MAPK14,CTSS,JAK1,JAK2,MAPK1,MAPK8,MAPK10,VDR	8/180
13_Member	KEGG Pathway	hsa04722	Neurotrophin signaling pathway	-7.34971	-5.42294	1432,2932,5594,5599,5602,5663,5664	MAPK14,GSK3B,MAPK1,MAPK8,MAPK10,PSEN1,PSEN2	7/120
13_Member	KEGG Pathway	hsa04935	Growth hormone synthesis, secretion and action	-7.3001	-5.37662	1432,2932,3717,5594,5599,5602,5747	MAPK14,GSK3B,JAK2,MAPK1,MAPK8,MAPK10,PTK2	7/122
13_Member	KEGG Pathway	hsa05212	Pancreatic cancer	-7.11833	-5.21408	1956,2064,3716,5594,5599,5602	EGFR,ERBB2,JAK1,MAPK1,MAPK8,MAPK10	6/77
13_Member	GO Molecular Functions	GO:0004707	MAP kinase activity	-7.01308	-5.11967	1432,5594,5599,5602	MAPK14,MAPK1,MAPK8,MAPK10	4/16
13_Member	KEGG Pathway	hsa05162	Measles	-6.91046	-5.02763	898,1017,2932,3716,5599,5602,7297	CCNE1,CDK2,GSK3B,JAK1,MAPK8,MAPK10,TYK2	7/139
13_Member	KEGG Pathway	hsa04657	IL-17 signaling pathway	-6.5714	-4.72983	1432,2932,5594,5599,5602,5743	MAPK14,GSK3B,MAPK1,MAPK8,MAPK10,PTGS2	6/95
13_Member	GO Biological Processes	GO:0018105	peptidyl-serine phosphorylation	-6.54988	-4.71101	983,1017,1432,2932,5594,5599,120892	CDK1,CDK2,MAPK14,GSK3B,MAPK1,MAPK8,LRRK2	7/157
13_Member	GO Molecular Functions	GO:0004674	protein serine/threonine kinase activity	-6.52291	-4.68807	983,1017,1432,1956,2932,5594,5599,5602,23476,120892	CDK1,CDK2,MAPK14,EGFR,GSK3B,MAPK1,MAPK8,MAPK10,BRD4,LRRK2	10/427
13_Member	GO Biological Processes	GO:0018107	peptidyl-threonine phosphorylation	-6.34669	-4.53904	983,2932,5594,5599,120892	CDK1,GSK3B,MAPK1,MAPK8,LRRK2	5/55
13_Member	GO Biological Processes	GO:0018209	peptidyl-serine modification	-6.33331	-4.52867	983,1017,1432,2932,5594,5599,120892	CDK1,CDK2,MAPK14,GSK3B,MAPK1,MAPK8,LRRK2	7/169
13_Member	KEGG Pathway	hsa05131	Shigellosis	-6.32909	-4.52644	1432,1956,2932,4193,5594,5599,5602,5747	MAPK14,EGFR,GSK3B,MDM2,MAPK1,MAPK8,MAPK10,PTK2	8/249
13_Member	KEGG Pathway	hsa04625	C-type lectin receptor signaling pathway	-6.31339	-4.51321	1432,4193,5594,5599,5602,5743	MAPK14,MDM2,MAPK1,MAPK8,MAPK10,PTGS2	6/105
13_Member	GO Biological Processes	GO:0090398	cellular senescence	-6.01438	-4.25199	1017,1432,3480,5599,5602	CDK2,MAPK14,IGF1R,MAPK8,MAPK10	5/64
13_Member	GO Biological Processes	GO:0018210	peptidyl-threonine modification	-5.98056	-4.2249	983,2932,5594,5599,120892	CDK1,GSK3B,MAPK1,MAPK8,LRRK2	5/65
13_Member	KEGG Pathway	hsa04664	Fc epsilon RI signaling pathway	-5.85059	-4.11025	240,1432,5594,5599,5602	ALOX5,MAPK14,MAPK1,MAPK8,MAPK10	5/69
13_Member	KEGG Pathway	hsa05415	Diabetic cardiomyopathy	-5.77126	-4.04306	142,1432,2932,3643,5599,5602,7137	PARP1,MAPK14,GSK3B,INSR,MAPK8,MAPK10,TNNI3	7/205
13_Member	KEGG Pathway	hsa05170	Human immunodeficiency virus 1 infection	-5.66088	-3.95065	891,983,1432,5594,5599,5602,5747	CCNB1,CDK1,MAPK14,MAPK1,MAPK8,MAPK10,PTK2	7/213
13_Member	KEGG Pathway	hsa04910	Insulin signaling pathway	-5.6175	-3.91668	2932,3643,5594,5599,5602,5836	GSK3B,INSR,MAPK1,MAPK8,MAPK10,PYGL	6/138
13_Member	KEGG Pathway	hsa05135	Yersinia infection	-5.6175	-3.91668	1432,2932,5594,5599,5602,5747	MAPK14,GSK3B,MAPK1,MAPK8,MAPK10,PTK2	6/138
13_Member	KEGG Pathway	hsa05418	Fluid shear stress and atherosclerosis	-5.5633	-3.87649	1432,3791,4780,5599,5602,5747	MAPK14,KDR,NFE2L2,MAPK8,MAPK10,PTK2	6/141
13_Member	KEGG Pathway	hsa05208	Chemical carcinogenesis - reactive oxygen species	-5.4908	-3.81246	1432,1956,4780,5594,5599,5602,5747	MAPK14,EGFR,NFE2L2,MAPK1,MAPK8,MAPK10,PTK2	7/226
13_Member	KEGG Pathway	hsa05210	Colorectal cancer	-5.35063	-3.69587	1956,2932,5594,5599,5602	EGFR,GSK3B,MAPK1,MAPK8,MAPK10	5/87
13_Member	KEGG Pathway	hsa05171	Coronavirus disease - COVID-19	-5.34302	-3.68914	1432,1956,3716,5594,5599,5602,7297	MAPK14,EGFR,JAK1,MAPK1,MAPK8,MAPK10,TYK2	7/238
13_Member	KEGG Pathway	hsa04932	Non-alcoholic fatty liver disease	-5.29368	-3.64885	1432,2932,3643,5468,5599,5602	MAPK14,GSK3B,INSR,PPARG,MAPK8,MAPK10	6/157
13_Member	KEGG Pathway	hsa04912	GnRH signaling pathway	-5.20812	-3.58162	1432,1956,5594,5599,5602	MAPK14,EGFR,MAPK1,MAPK8,MAPK10	5/93
13_Member	GO Molecular Functions	GO:0106310	protein serine kinase activity	-5.11423	-3.5015	983,1017,1432,2932,5594,5599,5602,120892	CDK1,CDK2,MAPK14,GSK3B,MAPK1,MAPK8,MAPK10,LRRK2	8/363
13_Member	KEGG Pathway	hsa04750	Inflammatory mediator regulation of TRP channels	-5.07508	-3.46555	1432,3356,5599,5602,7442	MAPK14,HTR2A,MAPK8,MAPK10,TRPV1	5/99
13_Member	KEGG Pathway	hsa04930	Type II diabetes mellitus	-5.05023	-3.44229	3643,5594,5599,5602	INSR,MAPK1,MAPK8,MAPK10	4/47
13_Member	KEGG Pathway	hsa04933	AGE-RAGE signaling pathway in diabetic complications	-5.03264	-3.43021	1432,3717,5594,5599,5602	MAPK14,JAK2,MAPK1,MAPK8,MAPK10	5/101
13_Member	KEGG Pathway	hsa04931	Insulin resistance	-4.87139	-3.28958	2932,3643,5599,5602,5836	GSK3B,INSR,MAPK8,MAPK10,PYGL	5/109
13_Member	KEGG Pathway	hsa04621	NOD-like receptor signaling pathway	-4.8337	-3.25856	1432,3716,5594,5599,5602,7297	MAPK14,JAK1,MAPK1,MAPK8,MAPK10,TYK2	6/189
13_Member	KEGG Pathway	hsa04668	TNF signaling pathway	-4.68674	-3.13311	1432,5594,5599,5602,5743	MAPK14,MAPK1,MAPK8,MAPK10,PTGS2	5/119
13_Member	KEGG Pathway	hsa04071	Sphingolipid signaling pathway	-4.63458	-3.09335	1432,4985,5594,5599,5602	MAPK14,OPRD1,MAPK1,MAPK8,MAPK10	5/122
13_Member	KEGG Pathway	hsa04660	T cell receptor signaling pathway	-4.63458	-3.09335	1432,2932,5594,5599,5602	MAPK14,GSK3B,MAPK1,MAPK8,MAPK10	5/122
13_Member	GO Biological Processes	GO:0046686	response to cadmium ion	-4.59679	-3.05963	983,1956,5594,5599	CDK1,EGFR,MAPK1,MAPK8	4/61
13_Member	KEGG Pathway	hsa04926	Relaxin signaling pathway	-4.50193	-2.97672	1432,1956,5594,5599,5602	MAPK14,EGFR,MAPK1,MAPK8,MAPK10	5/130
13_Member	GO Biological Processes	GO:0051403	stress-activated MAPK cascade	-4.40076	-2.89099	1432,5594,5599	MAPK14,MAPK1,MAPK8	3/24
13_Member	KEGG Pathway	hsa04024	cAMP signaling pathway	-4.39739	-2.88825	1128,1129,5594,5599,5602,7137	CHRM1,CHRM2,MAPK1,MAPK8,MAPK10,TNNI3	6/226
13_Member	KEGG Pathway	hsa05120	Epithelial cell signaling in Helicobacter pylori infection	-4.33598	-2.83497	1432,1956,5599,5602	MAPK14,EGFR,MAPK8,MAPK10	4/71
13_Member	GO Biological Processes	GO:0031098	stress-activated protein kinase signaling cascade	-4.24345	-2.76001	1432,5594,5599	MAPK14,MAPK1,MAPK8	3/27
13_Member	KEGG Pathway	hsa04723	Retrograde endocannabinoid signaling	-4.21921	-2.73995	1432,5594,5599,5602,5743	MAPK14,MAPK1,MAPK8,MAPK10,PTGS2	5/149
13_Member	KEGG Pathway	hsa05133	Pertussis	-4.17563	-2.70047	1432,5594,5599,5602	MAPK14,MAPK1,MAPK8,MAPK10	4/78
13_Member	KEGG Pathway	hsa04310	Wnt signaling pathway	-3.90158	-2.4574	2932,5467,5599,5602,5663	GSK3B,PPARD,MAPK8,MAPK10,PSEN1	5/174
13_Member	GO Biological Processes	GO:0071276	cellular response to cadmium ion	-3.79298	-2.36219	1956,5594,5599	EGFR,MAPK1,MAPK8	3/38
13_Member	KEGG Pathway	hsa05231	Choline metabolism in cancer	-3.77334	-2.3457	1956,5594,5599,5602	EGFR,MAPK1,MAPK8,MAPK10	4/99
13_Member	KEGG Pathway	hsa05142	Chagas disease	-3.70714	-2.28778	1432,5594,5599,5602	MAPK14,MAPK1,MAPK8,MAPK10	4/103
13_Member	KEGG Pathway	hsa04728	Dopaminergic synapse	-3.29693	-1.92929	1432,2932,5599,5602	MAPK14,GSK3B,MAPK8,MAPK10	4/132
13_Member	GO Biological Processes	GO:0038093	Fc receptor signaling pathway	-3.29192	-1.92566	5599,5602,5747	MAPK8,MAPK10,PTK2	3/56
13_Member	GO Biological Processes	GO:0007254	JNK cascade	-3.24711	-1.88401	5599,5602,120892	MAPK8,MAPK10,LRRK2	3/58
13_Member	KEGG Pathway	hsa04936	Alcoholic liver disease	-3.15501	-1.80325	1432,2932,5599,5602	MAPK14,GSK3B,MAPK8,MAPK10	4/144
13_Member	GO Biological Processes	GO:0002764	immune response-regulating signaling pathway	-3.13694	-1.78935	1520,5594,5599,5602,5663,5747	CTSS,MAPK1,MAPK8,MAPK10,PSEN1,PTK2	6/387
13_Member	KEGG Pathway	hsa04920	Adipocytokine signaling pathway	-3.00852	-1.6721	3717,5599,5602	JAK2,MAPK8,MAPK10	3/70
13_Member	KEGG Pathway	hsa04622	RIG-I-like receptor signaling pathway	-2.97302	-1.63997	1432,5599,5602	MAPK14,MAPK8,MAPK10	3/72
13_Member	KEGG Pathway	hsa05020	Prion disease	-2.97195	-1.63932	1432,2932,5594,5599,5602	MAPK14,GSK3B,MAPK1,MAPK8,MAPK10	5/278
13_Member	GO Biological Processes	GO:0002768	immune response-regulating cell surface receptor signaling pathway	-2.93763	-1.61168	5594,5599,5602,5663,5747	MAPK1,MAPK8,MAPK10,PSEN1,PTK2	5/283
13_Member	KEGG Pathway	hsa04140	Autophagy - animal	-2.8969	-1.57467	3480,5594,5599,5602	IGF1R,MAPK1,MAPK8,MAPK10	4/169
13_Member	KEGG Pathway	hsa05130	Pathogenic Escherichia coli infection	-2.60667	-1.31951	1432,5594,5599,5602	MAPK14,MAPK1,MAPK8,MAPK10	4/203
13_Member	KEGG Pathway	hsa05132	Salmonella infection	-2.27886	-1.0259	1432,5594,5599,5602	MAPK14,MAPK1,MAPK8,MAPK10	4/251
13_Member	KEGG Pathway	hsa05012	Parkinson disease	-2.16293	-0.924769	4780,5599,5602,120892	NFE2L2,MAPK8,MAPK10,LRRK2	4/271
14_Summary	GO Cellular Components	GO:0097060	synaptic membrane	-13.7408	-10.9504	1128,1129,1131,1132,2064,3356,3738,4985,4986,5663,5664,7442,10280,23385,51107,55851,1586,2932,3480,3643,4988,5599,6335,120892,3717,5747,3784	CHRM1,CHRM2,CHRM3,CHRM4,ERBB2,HTR2A,KCNA3,OPRD1,OPRK1,PSEN1,PSEN2,TRPV1,SIGMAR1,NCSTN,APH1A,PSENEN,CYP17A1,GSK3B,IGF1R,INSR,OPRM1,MAPK8,SCN9A,LRRK2,JAK2,PTK2,KCNQ1	27/-
14_Member	GO Cellular Components	GO:0097060	synaptic membrane	-13.7408	-10.9504	1128,1129,1131,1132,2064,3356,3738,4985,4986,5663,5664,7442,10280,23385,51107,55851	CHRM1,CHRM2,CHRM3,CHRM4,ERBB2,HTR2A,KCNA3,OPRD1,OPRK1,PSEN1,PSEN2,TRPV1,SIGMAR1,NCSTN,APH1A,PSENEN	16/401
14_Member	GO Cellular Components	GO:0042734	presynaptic membrane	-13.3184	-10.5628	1128,1129,2064,3356,3738,4985,4986,5663,5664,23385,51107,55851	CHRM1,CHRM2,ERBB2,HTR2A,KCNA3,OPRD1,OPRK1,PSEN1,PSEN2,NCSTN,APH1A,PSENEN	12/169
14_Member	GO Cellular Components	GO:0030424	axon	-10.5452	-8.19079	1128,1129,1586,2932,3356,3480,3643,3738,4985,4986,4988,5599,5663,6335,10280,120892	CHRM1,CHRM2,CYP17A1,GSK3B,HTR2A,IGF1R,INSR,KCNA3,OPRD1,OPRK1,OPRM1,MAPK8,PSEN1,SCN9A,SIGMAR1,LRRK2	16/652
14_Member	GO Cellular Components	GO:0098794	postsynapse	-9.43649	-7.22964	1128,1129,1131,1132,2932,3356,3717,3738,4985,4986,5663,5747,7442,10280,120892	CHRM1,CHRM2,CHRM3,CHRM4,GSK3B,HTR2A,JAK2,KCNA3,OPRD1,OPRK1,PSEN1,PTK2,TRPV1,SIGMAR1,LRRK2	15/660
14_Member	GO Cellular Components	GO:0098793	presynapse	-9.25622	-7.08848	1128,1129,2064,2932,3356,3738,4985,4986,5663,5664,23385,51107,55851,120892	CHRM1,CHRM2,ERBB2,GSK3B,HTR2A,KCNA3,OPRD1,OPRK1,PSEN1,PSEN2,NCSTN,APH1A,PSENEN,LRRK2	14/570
14_Member	GO Cellular Components	GO:0045211	postsynaptic membrane	-8.23782	-6.20072	1128,1129,1131,1132,3356,3738,4985,4986,7442,10280	CHRM1,CHRM2,CHRM3,CHRM4,HTR2A,KCNA3,OPRD1,OPRK1,TRPV1,SIGMAR1	10/280
14_Member	GO Cellular Components	GO:0043025	neuronal cell body	-6.9323	-5.04647	1129,1586,3356,3480,3643,3784,4986,4988,5663,7442,120892	CHRM2,CYP17A1,HTR2A,IGF1R,INSR,KCNQ1,OPRK1,OPRM1,PSEN1,TRPV1,LRRK2	11/492
14_Member	GO Cellular Components	GO:0044297	cell body	-6.38121	-4.56211	1129,1586,3356,3480,3643,3784,4986,4988,5663,7442,120892	CHRM2,CYP17A1,HTR2A,IGF1R,INSR,KCNQ1,OPRK1,OPRM1,PSEN1,TRPV1,LRRK2	11/559
14_Member	GO Cellular Components	GO:0043679	axon terminus	-6.1479	-4.36702	1128,1129,3738,4985,4986,120892	CHRM1,CHRM2,KCNA3,OPRD1,OPRK1,LRRK2	6/112
14_Member	GO Cellular Components	GO:0150034	distal axon	-6.01635	-4.25283	1128,1129,3738,4985,4986,5663,10280,120892	CHRM1,CHRM2,KCNA3,OPRD1,OPRK1,PSEN1,SIGMAR1,LRRK2	8/274
14_Member	GO Cellular Components	GO:0044306	neuron projection terminus	-5.80775	-4.07487	1128,1129,3738,4985,4986,120892	CHRM1,CHRM2,KCNA3,OPRD1,OPRK1,LRRK2	6/128
15_Summary	GO Biological Processes	GO:0048511	rhythmic process	-13.5729	-10.7944	983,1956,2099,2932,3480,3615,4986,5241,5468,5599,5602,6335,7298,8864	CDK1,EGFR,ESR1,GSK3B,IGF1R,IMPDH2,OPRK1,PGR,PPARG,MAPK8,MAPK10,SCN9A,TYMS,PER2	14/-
15_Member	GO Biological Processes	GO:0048511	rhythmic process	-13.5729	-10.7944	983,1956,2099,2932,3480,3615,4986,5241,5468,5599,5602,6335,7298,8864	CDK1,EGFR,ESR1,GSK3B,IGF1R,IMPDH2,OPRK1,PGR,PPARG,MAPK8,MAPK10,SCN9A,TYMS,PER2	14/271
15_Member	GO Biological Processes	GO:0007623	circadian rhythm	-5.6175	-3.91668	1956,2932,3615,6335,7298,8864	EGFR,GSK3B,IMPDH2,SCN9A,TYMS,PER2	6/138
16_Summary	GO Biological Processes	GO:0141193	nuclear receptor-mediated signaling pathway	-13.2904	-10.5457	367,2099,2908,3717,4306,5241,5468,5594,7068,7421,5467,1956,2322,3480,706,2260,2263,3643,3988,5663,7298,3290,4780,8864,3791,4193,7137,7139,1432,5743,5747,23385,120892,1586,3753,4986,2932,23476,142,983,5724,4985	AR,ESR1,NR3C1,JAK2,NR3C2,PGR,PPARG,MAPK1,THRB,VDR,PPARD,EGFR,FLT3,IGF1R,TSPO,FGFR1,FGFR2,INSR,LIPA,PSEN1,TYMS,HSD11B1,NFE2L2,PER2,KDR,MDM2,TNNI3,TNNT2,MAPK14,PTGS2,PTK2,NCSTN,LRRK2,CYP17A1,KCNE1,OPRK1,GSK3B,BRD4,PARP1,CDK1,PTAFR,OPRD1	42/-
16_Member	GO Biological Processes	GO:0141193	nuclear receptor-mediated signaling pathway	-13.2904	-10.5457	367,2099,2908,3717,4306,5241,5468,5594,7068,7421	AR,ESR1,NR3C1,JAK2,NR3C2,PGR,PPARG,MAPK1,THRB,VDR	10/87
16_Member	GO Molecular Functions	GO:0004879	nuclear receptor activity	-13.1607	-10.4271	367,2099,2908,4306,5241,5467,5468,7068,7421	AR,ESR1,NR3C1,NR3C2,PGR,PPARD,PPARG,THRB,VDR	9/59
16_Member	GO Molecular Functions	GO:0098531	ligand-activated transcription factor activity	-13.0911	-10.3878	367,2099,2908,4306,5241,5467,5468,7068,7421	AR,ESR1,NR3C1,NR3C2,PGR,PPARD,PPARG,THRB,VDR	9/60
16_Member	GO Biological Processes	GO:0009755	hormone-mediated signaling pathway	-12.6551	-9.99862	367,2099,2908,3717,4306,5241,5467,5468,5594,7068,7421	AR,ESR1,NR3C1,JAK2,NR3C2,PGR,PPARD,PPARG,MAPK1,THRB,VDR	11/142
16_Member	GO Biological Processes	GO:0071383	cellular response to steroid hormone stimulus	-12.2654	-9.66683	367,1956,2099,2322,2908,3480,3717,4306,5241,5467,5594	AR,EGFR,ESR1,FLT3,NR3C1,IGF1R,JAK2,NR3C2,PGR,PPARD,MAPK1	11/154
16_Member	GO Biological Processes	GO:0048732	gland development	-12.1222	-9.53894	367,706,1956,2099,2260,2263,2908,3643,3717,3988,5241,5594,5663,7298,7421	AR,TSPO,EGFR,ESR1,FGFR1,FGFR2,NR3C1,INSR,JAK2,LIPA,PGR,MAPK1,PSEN1,TYMS,VDR	15/425
16_Member	GO Biological Processes	GO:0030522	intracellular receptor signaling pathway	-11.3664	-8.90046	367,2099,2908,3717,4306,5241,5467,5468,5594,7068,7421	AR,ESR1,NR3C1,JAK2,NR3C2,PGR,PPARD,PPARG,MAPK1,THRB,VDR	11/186
16_Member	GO Biological Processes	GO:0061180	mammary gland epithelium development	-11.314	-8.85933	367,2099,2263,2908,3717,5241,5594,7421	AR,ESR1,FGFR2,NR3C1,JAK2,PGR,MAPK1,VDR	8/59
16_Member	GO Biological Processes	GO:0022612	gland morphogenesis	-10.8265	-8.43406	367,1956,2099,2260,2263,2908,3988,5241,7421	AR,EGFR,ESR1,FGFR1,FGFR2,NR3C1,LIPA,PGR,VDR	9/105
16_Member	GO Biological Processes	GO:0043401	steroid hormone receptor signaling pathway	-10.3081	-7.98671	367,2099,2908,3717,4306,5241,5467,5594	AR,ESR1,NR3C1,JAK2,NR3C2,PGR,PPARD,MAPK1	8/78
16_Member	GO Molecular Functions	GO:0034056	estrogen response element binding	-10.182	-7.88449	367,2099,2908,4306,5241	AR,ESR1,NR3C1,NR3C2,PGR	5/11
16_Member	GO Biological Processes	GO:0060603	mammary gland duct morphogenesis	-9.58216	-7.3527	367,2099,2263,2908,5241,7421	AR,ESR1,FGFR2,NR3C1,PGR,VDR	6/31
16_Member	GO Biological Processes	GO:0030518	nuclear receptor-mediated steroid hormone signaling pathway	-9.37637	-7.18498	367,2099,2908,3717,4306,5241,5594	AR,ESR1,NR3C1,JAK2,NR3C2,PGR,MAPK1	7/62
16_Member	GO Molecular Functions	GO:0005496	steroid binding	-9.19315	-7.03676	367,706,2099,2908,3290,4306,5241,7421	AR,TSPO,ESR1,NR3C1,HSD11B1,NR3C2,PGR,VDR	8/107
[truncated: 122 more rows]

## Sheet: Annotation-PT and Brain injury
MyList	Gene ID	Type	Tax ID	Homologene Gene ID	Homologene Gene Tax ID	GO:0009725 response to hormone	GO:1901699 cellular response to nitrogen	hsa05200 Pathways in cancer	GO:0044057 regulation of system process	GO:0048545 response to steroid hormone	GO:0006468 protein phosphorylation	GO:0007610 behavior	GO:0070201 regulation of establishment of	GO:0010817 regulation of hormone levels	GO:0031667 response to nutrient levels	GO:0045121 membrane raft	GO:0042391 regulation of membrane potenti	hsa04914 Progesterone-mediated oocyte m	GO:0097060 synaptic membrane	GO:0048511 rhythmic process	GO:0141193 nuclear receptor-mediated sign	hsa04080 Neuroactive ligand-receptor in	GO:0045862 positive regulation of proteol	GO:0010038 response to metal ion	GO:0019901 protein kinase binding
[truncated: 84 more rows]

[truncated: 2 more sheets: Enrichment-PT and Liver injury, Annotation-PT and Liver injury]
