# Supplementary material for: Efficient analysis of the toxicity and mechanisms of Hexaconazole and two other triazole fungicides: insights from integrated network toxicology, molecular docking and bioinformatics data
Source: Research Square preprint supplement (doi:10.21203/rs.3.rs-5318182/v1), 2024-10-29
Supplement: Supplementary file 6 [file e2414f288502890e6e471cb4.xlsx]

## Sheet: Annotation
MyList	Gene ID	Type	Tax ID	Homologene Gene ID	Homologene Gene Tax ID	GO:0001944 vasculature development	GO:0000902 cell morphogenesis	GO:0043408 regulation of MAPK cascade	GO:0005925 focal adhesion	GO:0030198 extracellular matrix organizat	GO:0097435 supramolecular fiber organizat	GO:0031589 cell-substrate adhesion	GO:0120035 regulation of plasma membrane	GO:0008283 cell population proliferation	hsa04510 Focal adhesion	GO:0009611 response to wounding	GO:0032835 glomerulus development	GO:0030199 collagen fibril organization	GO:0034330 cell junction organization	GO:0001501 skeletal system development	GO:0031252 cell leading edge	GO:0007167 enzyme-linked receptor protein	GO:0010810 regulation of cell-substrate a	GO:0003013 circulatory system process	GO:0030855 epithelial cell differentiatio
CPEB3	22849	symbol	H. sapiens	22849	H. sapiens	0	0	0	0	0	0	0	0	0	0	0	0	1	0	0	0	0	0	0	0
PCLO	27445	symbol	H. sapiens	27445	H. sapiens	0	0	0	0	0	0	0	0	0	0	0	0	0	1	0	0	0	0	0	0
SYT13	57586	symbol	H. sapiens	57586	H. sapiens	0	0	0	0	0	0	0	0	0	0	0	0	0	0	0	0	0	0	0	0
RASGRP1	10125	symbol	H. sapiens	10125	H. sapiens	0	0	1	0	0	0	0	1	1	0	1	0	1	0	0	0	0	0	0	0
AGAP2	116986	symbol	H. sapiens	116986	H. sapiens	0	0	1	0	0	1	0	0	0	0	0	0	0	0	0	0	0	0	0	0
NEFH	4744	symbol	H. sapiens	4744	H. sapiens	0	1	1	0	0	1	0	0	0	0	0	0	0	1	0	0	0	0	0	0
GABRG2	2566	symbol	H. sapiens	2566	H. sapiens	0	0	0	0	0	0	0	0	0	0	0	0	0	1	0	1	0	0	0	0
PAK1	5058	symbol	H. sapiens	5058	H. sapiens	1	1	1	1	0	1	0	1	1	1	1	0	0	0	0	1	1	0	0	0
IPCEF1	26034	symbol	H. sapiens	26034	H. sapiens	0	0	0	0	0	0	0	0	0	0	0	0	0	0	0	0	0	0	0	0
NRIP3	56675	symbol	H. sapiens	56675	H. sapiens	0	0	0	0	0	0	0	0	0	0	0	0	0	0	0	0	0	0	0	0
PSD3	23362	symbol	H. sapiens	23362	H. sapiens	0	0	0	0	0	0	0	0	0	0	0	0	0	0	0	1	0	1	0	0
EPB41L1	2036	symbol	H. sapiens	2036	H. sapiens	0	0	0	1	0	1	0	0	0	0	0	0	0	0	0	0	0	0	0	0
PAK6	56924	symbol	H. sapiens	56924	H. sapiens	0	1	1	0	0	0	0	0	0	1	0	0	0	0	0	0	0	0	0	0
CDC42	998	symbol	H. sapiens	998	H. sapiens	1	1	1	1	1	1	1	1	1	1	0	0	1	1	0	1	0	1	1	1
NDRG4	65009	symbol	H. sapiens	65009	H. sapiens	1	1	1	0	0	0	0	1	1	0	0	0	0	0	0	1	0	0	0	0
CALM3	808	symbol	H. sapiens	808	H. sapiens	0	0	1	0	0	0	0	0	0	0	0	0	0	0	0	0	0	0	1	0
MAPK8IP3	23162	symbol	H. sapiens	23162	H. sapiens	0	1	1	0	0	0	0	0	0	0	1	0	0	0	0	0	0	0	0	0
SLC7A14	57709	symbol	H. sapiens	57709	H. sapiens	0	0	0	0	0	0	0	0	0	0	0	0	0	0	0	0	0	0	0	0
PTK2B	2185	symbol	H. sapiens	2185	H. sapiens	1	1	1	1	0	1	1	1	1	0	1	0	0	1	0	1	1	1	1	0
NEDD4L	23327	symbol	H. sapiens	23327	H. sapiens	0	0	0	0	0	1	0	1	0	0	0	0	0	0	0	0	0	0	1	0
PRKCZ	5590	symbol	H. sapiens	5590	H. sapiens	0	1	1	1	1	1	0	1	0	0	0	0	1	1	0	1	0	1	1	0
EIF4E	1977	symbol	H. sapiens	1977	H. sapiens	0	0	0	0	1	0	0	0	0	0	0	0	0	1	0	0	0	0	0	0
PTPRO	5800	symbol	H. sapiens	5800	H. sapiens	0	1	1	0	0	0	0	1	0	0	1	1	0	1	0	1	0	1	1	1
NAP1L2	4674	symbol	H. sapiens	4674	H. sapiens	0	0	0	0	0	0	0	0	0	0	0	0	0	0	0	0	0	0	0	0
DGKG	1608	symbol	H. sapiens	1608	H. sapiens	0	0	0	0	0	0	0	1	0	0	1	0	0	0	0	0	0	0	0	0
SCN1B	6324	symbol	H. sapiens	6324	H. sapiens	0	1	0	0	0	1	0	1	0	0	0	0	0	0	0	0	0	0	1	0
PNMAL2	57469	gene_synonym	H. sapiens	57469	H. sapiens	0	0	0	0	0	0	0	0	0	0	0	0	0	0	0	0	0	0	0	0
INPP4A	3631	symbol	H. sapiens	3631	H. sapiens	0	0	0	0	0	0	0	0	0	0	0	0	0	0	0	0	0	0	0	0
HHLA2	11148	symbol	H. sapiens	11148	H. sapiens	0	0	0	0	0	0	0	0	0	0	0	0	0	0	0	0	0	0	0	0
CDS1	1040	symbol	H. sapiens	1040	H. sapiens	0	0	0	0	0	0	0	0	0	0	0	0	0	0	0	0	0	0	0	0
ATG9B	285973	symbol	H. sapiens	285973	H. sapiens	0	0	0	0	0	0	0	0	0	0	0	0	0	0	1	0	0	0	0	0
PLEKHM1	9842	symbol	H. sapiens	9842	H. sapiens	0	0	0	0	0	1	0	1	0	0	0	0	0	0	0	0	0	0	0	0
PPP1R3F	89801	symbol	H. sapiens	89801	H. sapiens	0	0	1	0	0	0	0	0	0	0	0	0	0	0	0	0	0	0	0	0
AMER2	219287	symbol	H. sapiens	219287	H. sapiens	0	0	0	0	0	0	0	0	0	0	0	0	0	0	0	0	0	0	0	0
SEMA4D	10507	symbol	H. sapiens	10507	H. sapiens	0	1	1	0	0	1	0	1	0	0	0	0	0	1	1	0	0	0	0	0
FOXRED2	80020	symbol	H. sapiens	80020	H. sapiens	0	0	0	0	1	0	0	0	0	0	0	0	0	0	0	0	0	0	0	0
CALN1	83698	symbol	H. sapiens	83698	H. sapiens	0	0	0	0	0	0	0	0	0	0	0	0	0	0	0	0	0	0	0	0
KLK10	5655	symbol	H. sapiens	5655	H. sapiens	0	0	0	0	0	0	0	0	0	0	0	0	0	0	0	0	0	0	0	0
RNF39	80352	symbol	H. sapiens	80352	H. sapiens	0	0	0	0	0	0	0	0	0	0	0	0	0	0	0	0	0	0	0	0
CPNE9	151835	symbol	H. sapiens	151835	H. sapiens	0	0	0	0	0	0	0	1	0	0	0	0	0	0	0	0	0	0	0	0
IGF2BP3	10643	symbol	H. sapiens	10643	H. sapiens	0	0	0	0	0	0	0	0	0	0	0	0	0	0	0	0	0	0	0	0
GALNT3	2591	symbol	H. sapiens	2591	H. sapiens	0	0	0	0	0	0	0	0	0	0	0	0	0	0	0	0	1	0	0	0
DMXL2	23312	symbol	H. sapiens	23312	H. sapiens	0	0	0	0	0	0	0	0	0	0	0	0	0	0	0	0	0	0	0	0
ZFYVE16	9765	symbol	H. sapiens	9765	H. sapiens	0	0	0	0	0	0	0	0	0	0	0	0	0	0	0	0	0	0	0	0
RFPL1S	10740	symbol	H. sapiens	10740	H. sapiens	0	0	0	0	0	0	0	0	0	0	0	0	0	0	0	0	0	0	0	0
TMEM144	55314	symbol	H. sapiens	55314	H. sapiens	0	0	0	0	0	0	0	0	0	0	0	0	0	0	0	0	0	0	0	0
NDST3	9348	symbol	H. sapiens	9348	H. sapiens	0	0	0	0	0	0	0	0	0	0	0	0	0	0	0	0	0	0	0	0
STRIP2	57464	symbol	H. sapiens	57464	H. sapiens	0	0	0	0	0	0	0	0	0	0	0	0	0	0	0	0	0	0	0	0
BRINP1	1620	symbol	H. sapiens	1620	H. sapiens	0	0	0	0	0	0	0	1	0	0	0	0	0	0	0	0	0	0	0	0
SLC6A12	6539	symbol	H. sapiens	6539	H. sapiens	0	0	0	0	0	0	0	0	0	0	0	0	0	0	0	0	0	0	0	0
AP1G2	8906	symbol	H. sapiens	8906	H. sapiens	0	0	0	0	0	0	0	0	0	0	0	0	0	0	0	0	0	0	0	0
ATP6V0C	527	symbol	H. sapiens	527	H. sapiens	0	0	0	1	1	0	0	0	0	0	0	0	0	0	0	0	0	0	0	0
OVOL2	58495	symbol	H. sapiens	58495	H. sapiens	1	0	0	0	0	0	0	0	1	0	0	0	0	0	1	0	0	0	0	1
MAPRE2	10982	symbol	H. sapiens	10982	H. sapiens	0	0	1	1	0	1	0	0	0	0	0	0	0	0	0	0	0	1	0	0
TFF1	7031	symbol	H. sapiens	7031	H. sapiens	0	0	0	0	0	0	0	0	1	0	0	0	0	0	0	0	0	0	0	0
WNT7A	7476	symbol	H. sapiens	7476	H. sapiens	1	1	1	0	1	1	0	1	1	1	1	0	1	1	1	0	1	0	1	1
ATP6V1A	523	symbol	H. sapiens	523	H. sapiens	0	0	0	0	1	0	0	0	0	0	0	0	0	0	0	0	0	0	0	0
GFRA2	2675	symbol	H. sapiens	2675	H. sapiens	0	0	0	0	0	0	0	0	0	0	0	0	0	0	0	0	1	0	0	0
MAPKBP1	23005	symbol	H. sapiens	23005	H. sapiens	0	0	1	0	0	0	0	0	0	0	0	0	0	0	0	0	0	0	0	0
LMOD3	56203	symbol	H. sapiens	56203	H. sapiens	0	0	0	1	0	1	0	1	0	0	0	0	1	0	0	0	0	0	0	0
SLC8A1	6546	symbol	H. sapiens	6546	H. sapiens	0	0	1	0	0	0	0	0	0	0	0	0	1	0	0	0	0	0	1	0
EPG5	57724	symbol	H. sapiens	57724	H. sapiens	0	0	0	0	0	0	0	0	0	0	0	0	0	0	0	0	0	0	0	0
PDXK	8566	symbol	H. sapiens	8566	H. sapiens	0	0	0	0	0	0	0	0	0	0	0	0	0	0	0	0	0	0	0	0
SLC26A4-AS1	286002	symbol	H. sapiens	286002	H. sapiens	0	0	0	0	0	0	0	0	0	0	0	0	0	0	0	0	0	0	0	0
CCDC30	728621	symbol	H. sapiens	728621	H. sapiens	0	0	0	0	0	0	0	0	0	0	0	0	0	0	0	0	0	0	0	0
CISD2	493856	symbol	H. sapiens	493856	H. sapiens	0	0	0	0	0	0	0	0	0	0	0	0	0	0	0	0	0	0	0	0
BSPRY	54836	symbol	H. sapiens	54836	H. sapiens	0	0	0	0	0	0	0	0	0	0	0	0	0	0	0	1	0	0	0	0
ITGAM	3684	symbol	H. sapiens	3684	H. sapiens	0	0	0	0	1	0	1	0	0	1	1	0	0	1	0	0	0	0	0	0
FAM49B	51571	gene_synonym	H. sapiens	51571	H. sapiens	0	0	0	0	0	1	0	0	0	0	0	0	0	0	0	0	0	0	0	0
HIVEP3	59269	symbol	H. sapiens	59269	H. sapiens	0	0	0	0	0	0	0	0	0	0	0	0	0	0	0	0	0	0	0	0
NTRK2	4915	symbol	H. sapiens	4915	H. sapiens	1	0	1	0	1	1	0	1	0	0	0	0	1	1	0	0	1	0	0	0
CYB5R4	51167	symbol	H. sapiens	51167	H. sapiens	0	0	0	0	0	0	0	0	0	0	0	0	0	0	0	0	0	0	0	0
LIMK1	3984	symbol	H. sapiens	3984	H. sapiens	0	1	1	1	0	1	0	1	0	1	0	0	0	1	0	1	0	0	0	0
LY6E	4061	symbol	H. sapiens	4061	H. sapiens	0	0	0	0	0	0	0	0	0	0	0	0	0	0	0	0	0	0	0	0
RUFY3	22902	symbol	H. sapiens	22902	H. sapiens	0	0	0	0	0	1	0	1	0	0	0	0	0	0	0	1	0	0	0	0
NLRP7	199713	symbol	H. sapiens	199713	H. sapiens	0	0	0	0	0	0	0	0	0	0	0	0	1	0	0	0	0	0	0	0
ABHD16A	7920	symbol	H. sapiens	7920	H. sapiens	0	0	0	0	0	0	0	0	0	0	0	0	0	0	0	0	0	0	0	0
HSD11B1	3290	symbol	H. sapiens	3290	H. sapiens	0	0	0	0	0	0	0	0	0	0	0	0	0	0	0	0	0	0	0	0
TMEM125	128218	symbol	H. sapiens	128218	H. sapiens	0	0	0	0	0	0	0	0	0	0	0	0	0	0	0	0	0	0	0	0
IRF6	3664	symbol	H. sapiens	3664	H. sapiens	0	0	0	0	0	0	0	0	1	0	0	0	0	0	0	0	0	0	0	1
EXPH5	23086	symbol	H. sapiens	23086	H. sapiens	0	0	0	0	0	0	0	0	0	0	0	0	0	0	0	0	0	0	0	1
CLIC5	53405	symbol	H. sapiens	53405	H. sapiens	0	0	0	1	0	0	0	0	0	0	0	0	0	0	0	0	0	0	0	0
NSMAF	8439	symbol	H. sapiens	8439	H. sapiens	0	0	0	0	0	0	0	0	0	0	0	0	0	0	0	0	0	0	0	0
GREM2	64388	symbol	H. sapiens	64388	H. sapiens	0	0	0	0	0	0	0	0	0	0	0	0	0	0	0	0	0	0	0	0
CORO2A	7464	symbol	H. sapiens	7464	H. sapiens	0	0	0	1	0	0	0	0	0	0	0	0	0	0	0	0	0	0	0	0
ELAVL4	1996	symbol	H. sapiens	1996	H. sapiens	0	1	0	0	0	0	0	1	0	0	0	0	0	1	0	0	1	0	0	0
IGLL5	100423062	symbol	H. sapiens	100423062	H. sapiens	0	0	0	0	0	0	0	0	0	0	0	0	0	0	0	0	0	0	0	0
EVL	51466	symbol	H. sapiens	51466	H. sapiens	0	0	0	1	0	1	0	1	0	0	0	0	0	0	0	1	0	0	0	0
POU2F2	5452	symbol	H. sapiens	5452	H. sapiens	0	0	0	0	0	0	0	0	0	0	0	0	0	0	0	0	0	0	0	0
SLC44A4	80736	symbol	H. sapiens	80736	H. sapiens	0	0	0	0	0	0	0	1	0	0	0	0	0	0	0	0	0	0	0	1
SLC30A2	7780	symbol	H. sapiens	7780	H. sapiens	0	0	0	0	0	0	0	0	0	0	0	0	0	0	0	0	0	0	0	0
MAP7	9053	symbol	H. sapiens	9053	H. sapiens	0	0	0	0	0	0	0	0	0	0	0	0	0	0	0	0	0	0	0	0
RTN2	6253	symbol	H. sapiens	6253	H. sapiens	0	0	0	0	0	0	0	0	0	0	0	0	0	0	0	0	0	0	0	0
FLCN	201163	symbol	H. sapiens	201163	H. sapiens	0	0	1	0	0	0	0	0	1	0	0	1	1	1	1	0	1	0	0	0
CYP2C18	1562	symbol	H. sapiens	1562	H. sapiens	0	0	0	0	0	0	0	0	0	0	0	0	0	0	0	0	0	0	0	0
CTNS	1497	symbol	H. sapiens	1497	H. sapiens	1	0	0	0	0	0	0	0	0	0	1	1	0	0	0	0	0	0	0	0
MIAT	440823	symbol	H. sapiens	440823	H. sapiens	0	0	0	0	0	0	0	0	0	0	0	0	0	0	0	0	0	0	0	0
KRT33A	3883	symbol	H. sapiens	3883	H. sapiens	0	0	0	0	0	1	0	0	0	0	0	0	0	0	0	0	0	0	0	1
CEACAM3	1084	symbol	H. sapiens	1084	H. sapiens	0	0	1	0	0	0	0	0	0	0	0	0	0	0	0	0	0	0	0	0
ATP6V0D1	9114	symbol	H. sapiens	9114	H. sapiens	0	0	0	0	1	0	0	0	0	0	0	0	0	0	0	0	0	0	0	0
RIMKLA	284716	symbol	H. sapiens	284716	H. sapiens	0	0	0	0	0	0	0	0	0	0	0	0	0	0	0	0	0	0	0	0
SEL1L3	23231	symbol	H. sapiens	23231	H. sapiens	0	0	0	0	0	0	0	0	0	0	0	0	0	0	0	0	0	0	0	0
KRT19	3880	symbol	H. sapiens	3880	H. sapiens	0	0	0	1	0	1	0	0	0	0	0	0	0	0	1	0	0	0	0	1
VSTM2L	128434	symbol	H. sapiens	128434	H. sapiens	0	0	0	0	0	0	0	0	0	0	0	0	0	0	0	0	0	0	0	0
PLCXD3	345557	symbol	H. sapiens	345557	H. sapiens	0	0	0	0	0	0	0	0	0	0	0	0	0	0	0	0	0	0	0	0
GRK3	157	symbol	H. sapiens	157	H. sapiens	0	0	0	0	0	0	0	0	0	0	0	0	0	0	0	0	0	0	0	0
JAKMIP1	152789	symbol	H. sapiens	152789	H. sapiens	0	0	1	0	0	0	0	0	0	0	0	0	0	0	0	0	0	0	0	0
ETNPPL	64850	symbol	H. sapiens	64850	H. sapiens	0	0	0	0	0	0	0	0	0	0	0	0	0	0	0	0	0	0	0	0
NUB1	51667	symbol	H. sapiens	51667	H. sapiens	0	0	0	0	0	0	0	0	0	0	0	0	0	0	0	0	0	0	0	0
ZDHHC21	340481	symbol	H. sapiens	340481	H. sapiens	0	0	0	0	0	0	0	0	0	0	0	0	0	0	0	0	0	0	1	0
RASGRP2	10235	symbol	H. sapiens	10235	H. sapiens	0	0	0	0	0	0	0	1	0	0	0	0	1	0	0	1	0	0	0	0
NIPA1	123606	symbol	H. sapiens	123606	H. sapiens	0	0	0	0	0	0	0	0	0	0	0	0	0	0	0	0	0	0	0	0
MESDC1	59274	gene_synonym	H. sapiens	59274	H. sapiens	0	0	0	1	0	0	0	0	0	0	0	0	0	0	0	0	0	0	0	0
DTX1	1840	symbol	H. sapiens	1840	H. sapiens	0	0	0	0	0	0	0	0	0	0	1	0	0	0	0	0	0	0	0	0
IGHM	3507	symbol	H. sapiens	3507	H. sapiens	0	0	0	0	0	0	0	0	0	0	0	0	0	0	0	0	0	0	0	0
GPD2	2820	symbol	H. sapiens	2820	H. sapiens	0	0	0	0	0	0	0	0	0	0	0	0	0	0	0	0	0	0	0	0
GPR85	54329	symbol	H. sapiens	54329	H. sapiens	0	0	0	0	0	0	0	0	0	0	0	0	0	0	0	0	0	0	0	0
SRD5A2	6716	symbol	H. sapiens	6716	H. sapiens	0	0	0	0	0	0	0	0	0	0	0	0	0	0	1	0	0	0	0	0
FCAMR	83953	symbol	H. sapiens	83953	H. sapiens	0	0	0	0	0	0	0	0	0	0	0	0	0	0	0	0	0	0	0	0
PHACTR1	221692	symbol	H. sapiens	221692	H. sapiens	0	1	0	1	0	1	0	0	0	0	0	0	0	0	0	0	0	0	0	0
SLC9A6	10479	symbol	H. sapiens	10479	H. sapiens	0	1	0	0	0	0	0	0	0	0	0	0	0	0	0	0	0	0	0	0
C3orf14	57415	gene_synonym	H. sapiens	57415	H. sapiens	0	0	0	0	0	0	0	0	0	0	0	0	0	0	0	0	0	0	0	0
BASP1	10409	symbol	H. sapiens	10409	H. sapiens	0	0	0	0	0	1	0	1	0	0	0	1	0	0	0	0	0	0	0	1
CYP2C8	1558	symbol	H. sapiens	1558	H. sapiens	0	0	0	0	0	0	0	0	0	0	0	0	0	0	0	0	0	0	0	0
NLN	57486	symbol	H. sapiens	57486	H. sapiens	0	0	0	0	0	0	0	0	0	0	0	0	0	0	0	0	0	0	0	0
GALNT5	11227	symbol	H. sapiens	11227	H. sapiens	0	0	0	0	0	0	0	0	0	0	0	0	0	0	0	0	0	0	0	0
BEX1	55859	symbol	H. sapiens	55859	H. sapiens	0	0	0	0	0	0	0	0	0	0	0	0	0	0	0	0	0	0	0	0
DPP10-AS1	389023	symbol	H. sapiens	389023	H. sapiens	0	0	0	0	0	0	0	0	0	0	0	0	0	0	0	0	0	0	0	0
PNMAL1	55228	gene_synonym	H. sapiens	55228	H. sapiens	0	0	0	0	0	0	0	0	0	0	0	0	0	0	0	0	0	0	0	0
GPRIN2	9721	symbol	H. sapiens	9721	H. sapiens	0	1	0	0	0	0	0	0	0	0	0	0	0	0	0	0	0	0	0	0
WHRN	25861	symbol	H. sapiens	25861	H. sapiens	0	1	0	1	0	0	0	0	0	0	0	0	0	1	0	0	0	0	0	1
XKR6	286046	symbol	H. sapiens	286046	H. sapiens	0	0	0	0	0	0	0	0	0	0	0	0	0	0	0	0	0	0	0	0
ATP13A2	23400	symbol	H. sapiens	23400	H. sapiens	0	0	0	0	0	1	0	0	0	0	0	0	0	0	0	0	0	0	0	0
MBP	4155	symbol	H. sapiens	4155	H. sapiens	0	0	0	0	0	0	0	0	0	0	0	0	1	0	0	0	0	0	0	0
PDE4DIP	9659	symbol	H. sapiens	9659	H. sapiens	0	0	0	0	0	1	0	0	0	0	0	0	0	0	0	0	0	0	0	0
CCDC88B	283234	symbol	H. sapiens	283234	H. sapiens	0	0	0	0	0	1	0	0	0	0	0	0	0	0	0	0	0	0	0	0
TTC39B	158219	symbol	H. sapiens	158219	H. sapiens	0	0	0	0	0	0	0	0	0	0	0	0	0	0	0	0	0	0	0	0
SLC4A4	8671	symbol	H. sapiens	8671	H. sapiens	0	0	1	0	0	0	0	0	0	0	0	0	0	0	0	0	0	0	1	0
SPINT2	10653	symbol	H. sapiens	10653	H. sapiens	1	1	0	0	1	0	0	0	1	0	0	0	0	0	1	0	1	0	0	1
FAM217B	63939	symbol	H. sapiens	63939	H. sapiens	0	0	0	0	0	0	0	0	0	0	0	0	0	0	0	0	0	0	0	0
GPCPD1	56261	symbol	H. sapiens	56261	H. sapiens	0	0	0	0	0	0	0	0	0	0	0	0	0	0	0	0	0	0	0	0
GAS7	8522	symbol	H. sapiens	8522	H. sapiens	0	1	0	1	0	1	0	0	0	0	0	0	0	0	0	0	0	0	0	0
SLC1A3	6507	symbol	H. sapiens	6507	H. sapiens	0	1	0	0	0	0	0	0	0	0	1	0	0	0	0	0	0	0	1	0
LOXL2	4017	symbol	H. sapiens	4017	H. sapiens	1	0	0	0	1	1	0	0	1	0	0	0	1	0	0	0	0	0	0	0
PHLDA1	22822	symbol	H. sapiens	22822	H. sapiens	0	0	0	0	0	0	0	0	0	0	0	0	0	0	0	0	0	0	0	0
SPARC	6678	symbol	H. sapiens	6678	H. sapiens	0	0	0	0	1	0	0	0	1	0	0	0	0	0	0	0	0	0	0	0
IGFBP5	3488	symbol	H. sapiens	3488	H. sapiens	0	0	0	0	1	0	0	1	1	0	0	0	1	0	0	0	1	0	1	0
C10orf10	11067	gene_synonym	H. sapiens	11067	H. sapiens	0	0	0	0	0	0	0	0	0	0	0	0	0	0	0	0	0	0	0	0
SERPINE1	5054	symbol	H. sapiens	5054	H. sapiens	1	0	0	0	1	0	0	0	0	0	1	0	1	0	0	0	0	1	0	0
CAV1	857	symbol	H. sapiens	857	H. sapiens	1	0	1	1	1	1	0	1	1	1	1	0	1	0	0	0	1	0	1	1
CSPG4	1464	symbol	H. sapiens	1464	H. sapiens	1	0	1	1	1	0	0	0	0	0	0	0	0	0	0	1	1	0	0	0
ITPRIPL2	162073	symbol	H. sapiens	162073	H. sapiens	0	0	0	0	0	0	0	0	0	0	0	0	0	0	0	0	0	0	0	0
NES	10763	symbol	H. sapiens	10763	H. sapiens	0	1	0	0	0	1	0	0	1	0	0	0	0	0	0	0	0	0	0	0
COL5A1	1289	symbol	H. sapiens	1289	H. sapiens	1	0	0	0	1	1	1	0	0	0	1	0	1	0	1	0	0	0	0	0
TWIST2	117581	symbol	H. sapiens	117581	H. sapiens	0	0	0	0	0	0	0	0	0	1	0	0	0	0	0	0	0	0	0	0
CNN3	1266	symbol	H. sapiens	1266	H. sapiens	0	0	0	1	0	1	0	0	0	0	0	0	0	0	0	0	0	0	0	1
FIGN	55137	symbol	H. sapiens	55137	H. sapiens	0	0	0	0	0	0	0	0	0	0	0	0	0	0	0	0	0	0	0	0
SEMA5A	9037	symbol	H. sapiens	9037	H. sapiens	1	1	0	0	0	1	0	1	1	0	0	0	0	0	0	0	0	0	0	0
PARD3	56288	symbol	H. sapiens	56288	H. sapiens	0	1	0	0	1	0	0	1	0	0	0	0	0	1	0	0	0	0	1	0
SGCE	8910	symbol	H. sapiens	8910	H. sapiens	0	0	0	0	0	0	1	0	0	0	0	0	1	0	0	1	0	0	0	0
SORBS1	10580	symbol	H. sapiens	10580	H. sapiens	0	0	0	1	0	1	1	0	0	0	0	0	0	1	0	0	1	0	0	0
TREM2	54209	symbol	H. sapiens	54209	H. sapiens	0	0	1	0	0	1	0	1	1	0	1	0	0	1	0	0	0	0	0	0
PALLD	23022	symbol	H. sapiens	23022	H. sapiens	0	1	0	1	0	1	0	0	0	0	0	0	0	0	0	1	0	0	0	1
MCL1	4170	symbol	H. sapiens	4170	H. sapiens	0	0	0	0	1	0	0	0	0	0	0	0	0	0	0	0	0	0	0	0
FBLIM1	54751	symbol	H. sapiens	54751	H. sapiens	0	0	0	1	0	1	0	0	0	0	0	0	0	0	0	0	0	0	0	0
ZNF503	84858	symbol	H. sapiens	84858	H. sapiens	0	0	0	0	0	0	0	0	1	0	0	0	0	0	0	0	0	0	0	0
YAP1	10413	symbol	H. sapiens	10413	H. sapiens	1	1	0	0	0	0	0	1	1	0	1	0	0	0	1	0	0	0	1	1
DCAF13	25879	symbol	H. sapiens	25879	H. sapiens	0	1	0	0	0	0	0	0	0	0	0	0	0	0	0	0	0	0	0	0
SNX7	51375	symbol	H. sapiens	51375	H. sapiens	0	0	0	0	0	1	0	0	0	0	0	0	0	0	0	0	0	0	0	0
BAX	581	symbol	H. sapiens	581	H. sapiens	1	0	0	0	1	1	0	0	1	0	1	1	1	0	0	0	0	0	0	0
SERBP1	26135	symbol	H. sapiens	26135	H. sapiens	0	0	0	0	0	0	0	0	0	0	0	0	0	0	0	0	0	0	0	0
FGF2	2247	symbol	H. sapiens	2247	H. sapiens	1	0	1	0	1	0	1	1	1	1	1	1	0	0	1	0	1	0	0	1
GLIS3	169792	symbol	H. sapiens	169792	H. sapiens	0	0	0	0	0	0	0	0	0	0	0	0	0	0	0	0	0	0	0	0
RPLP0	6175	symbol	H. sapiens	6175	H. sapiens	0	0	0	1	0	0	0	0	0	0	0	0	0	0	0	0	0	0	0	0
ANTXR1	84168	symbol	H. sapiens	84168	H. sapiens	1	0	0	1	0	1	1	0	0	0	0	0	0	0	0	1	0	0	0	0
EIF4EBP1	1978	symbol	H. sapiens	1978	H. sapiens	0	0	0	0	1	0	0	0	0	0	0	0	0	0	0	0	0	0	0	0
JUNB	3726	symbol	H. sapiens	3726	H. sapiens	1	0	0	0	0	0	0	0	1	0	0	0	0	0	1	0	0	0	0	0
KCTD3	51133	symbol	H. sapiens	51133	H. sapiens	0	0	0	0	0	0	0	0	0	0	0	0	0	0	0	0	0	0	0	0
TGFBI	7045	symbol	H. sapiens	7045	H. sapiens	1	0	0	0	1	0	1	0	1	0	0	0	0	0	1	0	0	0	0	0
PDPN	10630	symbol	H. sapiens	10630	H. sapiens	1	0	0	0	0	1	0	1	1	0	1	0	0	0	0	1	0	1	0	1
PARD3B	117583	symbol	H. sapiens	117583	H. sapiens	0	0	0	0	0	0	0	0	0	0	0	0	0	0	0	0	0	0	0	0
ADAMTS12	81792	symbol	H. sapiens	81792	H. sapiens	0	0	0	0	1	1	1	0	0	0	0	0	1	0	1	0	1	0	0	0
SH3RF3	344558	symbol	H. sapiens	344558	H. sapiens	0	0	1	0	0	0	0	0	0	0	0	0	0	0	0	0	0	0	0	0
JAG1	182	symbol	H. sapiens	182	H. sapiens	1	0	0	0	1	0	0	0	1	0	0	1	0	0	0	0	0	1	0	1
MYC	4609	symbol	H. sapiens	4609	H. sapiens	1	0	1	0	1	0	0	0	1	1	0	1	0	0	0	0	1	0	0	0
FERMT2	10979	symbol	H. sapiens	10979	H. sapiens	0	0	1	1	0	1	1	0	0	0	0	0	1	1	0	1	1	1	1	0
NECTIN3	25945	symbol	H. sapiens	25945	H. sapiens	0	0	0	0	0	0	0	0	0	0	0	0	0	0	0	0	0	0	0	0
CTGF	1490	gene_synonym	H. sapiens	1490	H. sapiens	1	0	1	0	1	1	1	0	1	0	1	0	1	0	1	0	1	0	0	0
CSGALNACT1	55790	symbol	H. sapiens	55790	H. sapiens	0	0	0	0	1	0	0	0	0	0	0	0	0	0	1	0	0	0	0	0
CDH11	1009	symbol	H. sapiens	1009	H. sapiens	0	1	0	0	0	0	1	0	0	0	0	0	0	1	1	0	0	0	0	0
LPP	4026	symbol	H. sapiens	4026	H. sapiens	0	0	0	1	0	0	0	0	0	0	0	0	0	0	0	0	0	0	0	0
LOXL1	4016	symbol	H. sapiens	4016	H. sapiens	1	0	0	0	1	1	0	0	0	0	0	0	1	0	0	0	0	0	0	0
COL5A2	1290	symbol	H. sapiens	1290	H. sapiens	0	0	0	0	1	1	0	0	0	0	0	0	1	0	1	0	0	0	0	0
TEAD1	7003	symbol	H. sapiens	7003	H. sapiens	0	0	0	0	0	0	0	1	0	0	0	0	0	0	0	0	0	0	0	0
COL3A1	1281	symbol	H. sapiens	1281	H. sapiens	1	1	0	0	1	1	1	0	1	0	1	0	1	0	1	0	1	0	0	0
REXO2	25996	symbol	H. sapiens	25996	H. sapiens	0	0	0	1	0	0	0	0	0	0	0	0	0	0	0	0	0	0	0	0
NEXN	91624	symbol	H. sapiens	91624	H. sapiens	0	1	0	1	0	1	0	0	0	0	0	0	0	0	0	0	0	0	0	0
KDELR2	11014	symbol	H. sapiens	11014	H. sapiens	0	0	0	0	0	0	0	0	0	0	0	0	0	0	0	0	0	0	0	0
SPTSSA	171546	symbol	H. sapiens	171546	H. sapiens	0	0	0	0	0	0	0	0	0	0	0	0	0	0	0	0	0	0	0	0
STAB1	23166	symbol	H. sapiens	23166	H. sapiens	0	0	0	0	0	0	0	0	0	0	0	0	0	0	0	0	0	0	0	0
GPC6	10082	symbol	H. sapiens	10082	H. sapiens	0	0	0	0	1	0	0	0	0	0	0	0	0	1	0	0	0	0	0	0
LAMB2	3913	symbol	H. sapiens	3913	H. sapiens	0	1	0	0	1	0	1	0	0	1	1	1	0	1	0	0	0	0	0	1
CAV2	858	symbol	H. sapiens	858	H. sapiens	0	0	1	1	1	0	0	0	1	1	0	0	1	0	0	0	1	0	0	0
PGM3	5238	symbol	H. sapiens	5238	H. sapiens	0	0	0	0	0	0	0	0	0	0	0	0	0	0	0	0	0	0	0	0
NR5A2	2494	symbol	H. sapiens	2494	H. sapiens	0	0	0	0	0	0	0	0	0	0	0	0	0	0	1	0	0	0	0	1
OSR2	116039	symbol	H. sapiens	116039	H. sapiens	0	0	0	0	0	0	0	0	1	0	0	1	0	0	1	0	0	0	0	0
OLFML3	56944	symbol	H. sapiens	56944	H. sapiens	0	0	0	0	0	0	0	0	0	0	0	0	0	0	0	0	0	0	0	0
COL18A1	80781	symbol	H. sapiens	80781	H. sapiens	1	1	0	0	1	1	0	0	1	0	0	0	1	0	1	0	0	0	0	1
ARHGAP35	2909	symbol	H. sapiens	2909	H. sapiens	1	1	0	1	0	1	0	1	0	1	1	0	1	0	1	0	0	0	1	0
IER3	8870	symbol	H. sapiens	8870	H. sapiens	0	0	0	0	0	0	0	0	0	0	0	0	0	0	0	0	0	0	1	0
TNFRSF19	55504	symbol	H. sapiens	55504	H. sapiens	0	0	1	0	0	0	0	0	0	0	0	0	0	0	0	0	0	0	0	0
GPC4	2239	symbol	H. sapiens	2239	H. sapiens	0	0	0	0	1	0	0	0	0	0	0	0	0	1	0	0	0	0	0	0
PLCE1	51196	symbol	H. sapiens	51196	H. sapiens	0	0	0	0	0	1	0	1	0	1	0	1	1	0	0	1	1	0	0	0
COL1A1	1277	symbol	H. sapiens	1277	H. sapiens	1	0	0	0	1	1	0	0	0	1	0	0	1	0	1	0	1	1	0	0
LAMC1	3915	symbol	H. sapiens	3915	H. sapiens	0	0	0	0	1	0	1	0	1	1	0	0	0	1	0	0	0	0	0	0
KATNAL1	84056	symbol	H. sapiens	84056	H. sapiens	0	0	0	0	0	1	0	0	0	0	0	0	0	0	0	0	0	0	0	0
COL12A1	1303	symbol	H. sapiens	1303	H. sapiens	0	0	0	0	1	1	0	0	0	0	0	0	1	0	0	0	0	0	0	0
ABCC4	10257	symbol	H. sapiens	10257	H. sapiens	0	0	0	0	0	0	0	0	0	0	0	0	0	0	0	0	0	0	1	0
KHDRBS3	10656	symbol	H. sapiens	10656	H. sapiens	0	0	0	0	0	0	0	0	0	0	0	0	0	0	0	0	0	0	0	0
EFNA1	1942	symbol	H. sapiens	1942	H. sapiens	1	1	1	0	1	0	1	1	0	0	0	0	0	1	0	0	1	0	0	0
PHB	5245	gene_synonym	H. sapiens	5245	H. sapiens	0	0	1	0	0	0	0	1	1	0	1	0	0	0	0	0	0	0	0	0
ELL2	22936	symbol	H. sapiens	22936	H. sapiens	0	0	0	0	0	0	0	0	0	0	0	0	0	0	0	0	0	0	0	0
TMEM45A	55076	symbol	H. sapiens	55076	H. sapiens	0	0	0	0	0	0	0	0	0	0	0	0	0	0	0	0	0	0	0	0
MGST2	4258	symbol	H. sapiens	4258	H. sapiens	0	0	0	0	0	0	0	0	0	0	0	0	0	0	0	0	0	0	0	0
TMEM133	143872	gene_synonym	H. sapiens	143872	H. sapiens	0	0	0	0	0	0	0	0	0	0	0	0	0	0	0	0	0	0	1	0
ANTXR2	118429	symbol	H. sapiens	118429	H. sapiens	0	0	0	0	0	0	0	0	0	0	0	0	0	0	0	0	0	0	0	0
CHST3	9469	symbol	H. sapiens	9469	H. sapiens	0	0	0	0	0	0	0	0	0	0	0	0	0	0	0	0	0	0	0	0
ITGA1	3672	symbol	H. sapiens	3672	H. sapiens	0	1	1	1	1	0	1	0	1	1	0	0	1	0	0	0	0	0	1	0
TNPO1	3842	symbol	H. sapiens	3842	H. sapiens	0	0	0	0	0	0	0	0	0	0	0	0	0	0	0	0	0	0	0	0
MAP4K4	9448	symbol	H. sapiens	9448	H. sapiens	0	1	1	1	0	1	0	0	0	0	0	0	0	0	0	0	0	1	0	0
RRP15	51018	symbol	H. sapiens	51018	H. sapiens	0	0	0	0	0	0	0	0	0	0	0	0	0	0	0	0	0	0	0	0
WDR78	79819	gene_synonym	H. sapiens	79819	H. sapiens	0	0	0	0	0	0	0	0	0	0	0	0	0	0	0	0	0	0	0	0
PLEKHA4	57664	symbol	H. sapiens	57664	H. sapiens	0	0	0	0	0	0	0	0	0	0	0	0	0	0	0	0	0	0	0	0
LRRC8A	56262	symbol	H. sapiens	56262	H. sapiens	0	0	0	0	0	0	0	1	0	0	1	0	0	0	0	0	0	0	0	0
PPFIBP1	8496	symbol	H. sapiens	8496	H. sapiens	0	0	0	1	0	0	0	0	0	0	0	0	0	1	0	0	0	0	0	0
SPRY4	81848	symbol	H. sapiens	81848	H. sapiens	0	0	1	1	0	0	0	0	0	0	0	0	0	0	0	1	0	1	0	0
CD248	57124	symbol	H. sapiens	57124	H. sapiens	0	0	0	0	1	0	0	0	1	0	0	0	0	0	0	0	0	0	0	0
FN1	2335	symbol	H. sapiens	2335	H. sapiens	1	0	1	0	1	0	1	1	0	1	1	0	1	1	0	0	0	1	0	0
IGFBP3	3486	symbol	H. sapiens	3486	H. sapiens	0	0	1	0	1	0	0	1	1	0	0	0	1	0	0	0	0	0	0	0
FKBP9	11328	symbol	H. sapiens	11328	H. sapiens	0	0	0	0	0	0	0	0	0	0	0	0	0	0	0	0	0	0	0	0
PACSIN3	29763	symbol	H. sapiens	29763	H. sapiens	0	0	0	0	0	0	0	0	0	0	0	0	0	0	0	0	0	0	0	0
CCDC102B	79839	symbol	H. sapiens	79839	H. sapiens	0	0	1	0	0	0	0	0	0	0	0	0	0	0	0	0	0	0	0	0
OTUD4	54726	symbol	H. sapiens	54726	H. sapiens	0	0	0	0	0	0	0	0	0	0	0	0	0	0	0	0	0	0	0	0
ENPEP	2028	symbol	H. sapiens	2028	H. sapiens	1	0	0	0	0	0	0	0	1	0	0	1	0	0	0	0	0	0	1	0
RNASE2	6036	symbol	H. sapiens	6036	H. sapiens	0	0	0	0	0	0	0	0	0	0	0	0	0	0	0	0	0	0	0	0
IQCH	64799	symbol	H. sapiens	64799	H. sapiens	0	0	0	0	0	0	0	0	0	0	0	0	0	0	0	0	0	0	0	0
TFPI	7035	symbol	H. sapiens	7035	H. sapiens	0	0	0	0	0	0	0	0	0	0	1	0	0	0	0	0	0	0	0	0
CSNK1E	1454	symbol	H. sapiens	1454	H. sapiens	0	0	0	0	0	0	0	0	0	0	0	0	0	0	0	0	1	0	0	0
PAICS	10606	symbol	H. sapiens	10606	H. sapiens	0	0	0	0	0	0	0	0	0	0	0	0	0	0	0	0	0	0	0	0
NEURL1B	54492	symbol	H. sapiens	54492	H. sapiens	0	0	0	1	0	0	0	0	0	0	0	0	0	0	0	0	0	0	0	0
YES1	7525	symbol	H. sapiens	7525	H. sapiens	0	0	1	1	0	0	0	0	0	0	0	0	1	0	0	0	1	0	1	0
NEDD4	4734	symbol	H. sapiens	4734	H. sapiens	0	1	0	0	0	0	0	1	0	0	0	0	0	1	0	0	0	0	0	0
EPHA3	2042	symbol	H. sapiens	2042	H. sapiens	0	1	0	1	0	1	0	1	0	0	0	0	0	0	0	0	1	1	0	0
GPR183	1880	symbol	H. sapiens	1880	H. sapiens	0	0	1	0	0	0	0	0	0	0	1	0	0	0	0	0	0	0	0	0
ECE2	9718	symbol	H. sapiens	9718	H. sapiens	0	0	0	0	0	0	0	0	0	0	0	0	0	0	0	0	0	0	0	0
TSHZ2	128553	symbol	H. sapiens	128553	H. sapiens	0	0	0	0	0	0	0	0	0	0	0	0	0	0	0	0	0	0	0	0
COL6A2	1292	symbol	H. sapiens	1292	H. sapiens	0	0	0	0	1	0	0	0	0	1	0	0	1	0	0	0	0	0	0	0
SH3D19	152503	symbol	H. sapiens	152503	H. sapiens	0	0	0	0	0	0	0	0	0	0	0	0	0	0	0	0	0	0	0	0
BMP8B	656	symbol	H. sapiens	656	H. sapiens	0	0	0	0	0	0	0	0	0	0	0	0	0	0	1	0	0	0	0	0
SHC1	6464	symbol	H. sapiens	6464	H. sapiens	1	0	1	1	0	1	0	0	0	1	0	0	1	0	0	0	1	0	0	0
SULF2	55959	symbol	H. sapiens	55959	H. sapiens	0	0	0	0	1	0	0	0	1	0	1	1	0	0	1	0	1	0	0	0
PDGFRA	5156	symbol	H. sapiens	5156	H. sapiens	1	0	1	0	1	1	0	0	0	1	1	1	1	0	1	0	1	0	0	0
SLC2A10	81031	symbol	H. sapiens	81031	H. sapiens	1	0	0	0	0	0	0	0	0	0	0	0	0	0	1	0	0	0	1	0
DCAKD	79877	symbol	H. sapiens	79877	H. sapiens	0	0	0	0	0	0	0	0	0	0	0	0	0	0	0	0	0	0	0	0
HMGA2	8091	symbol	H. sapiens	8091	H. sapiens	0	0	1	0	0	0	0	0	1	0	0	0	1	0	1	0	0	0	0	0
RBPMS	11030	symbol	H. sapiens	11030	H. sapiens	0	0	0	0	0	0	0	0	0	0	0	0	1	0	0	0	1	0	0	0
SYNPO2	171024	symbol	H. sapiens	171024	H. sapiens	0	0	0	1	0	1	0	0	0	0	0	0	1	0	0	0	0	0	0	0
PKDCC	91461	symbol	H. sapiens	91461	H. sapiens	0	1	0	0	0	0	0	0	0	0	0	0	0	0	1	0	0	0	0	0
RELL1	768211	symbol	H. sapiens	768211	H. sapiens	0	0	1	0	0	0	0	0	0	0	0	0	0	0	0	0	0	0	0	0
NRCAM	4897	symbol	H. sapiens	4897	H. sapiens	1	1	0	0	0	0	0	1	0	0	0	0	0	1	0	0	0	0	0	0
TPM1	7168	symbol	H. sapiens	7168	H. sapiens	0	0	0	1	0	1	0	0	1	0	1	0	1	0	0	1	0	0	1	0
SLC35F1	222553	symbol	H. sapiens	222553	H. sapiens	0	0	0	0	0	0	0	0	0	0	0	0	0	0	0	0	0	0	0	0
COL1A2	1278	symbol	H. sapiens	1278	H. sapiens	1	0	0	0	1	1	0	0	0	1	0	0	1	0	1	0	1	0	1	0
NID1	4811	symbol	H. sapiens	4811	H. sapiens	0	0	0	0	1	0	1	0	0	0	0	1	1	0	0	0	0	1	0	0
SORT1	6272	symbol	H. sapiens	6272	H. sapiens	0	0	0	0	0	0	0	0	0	0	0	0	1	1	0	0	1	0	0	0
FRMD6	122786	symbol	H. sapiens	122786	H. sapiens	0	1	0	0	0	1	0	0	0	0	0	0	0	0	0	0	0	0	0	1
ATRN	8455	symbol	H. sapiens	8455	H. sapiens	0	0	0	0	0	0	0	1	0	0	0	0	0	0	0	0	0	0	0	0
NTN4	59277	symbol	H. sapiens	59277	H. sapiens	0	1	0	0	1	0	1	0	0	0	0	0	1	0	0	0	0	0	0	0
LYPD1	116372	symbol	H. sapiens	116372	H. sapiens	0	0	0	0	0	0	0	0	0	0	0	0	0	0	0	0	0	0	0	0
EDNRA	1909	symbol	H. sapiens	1909	H. sapiens	1	1	0	0	0	0	0	0	1	0	1	1	0	0	1	0	0	0	1	1
PLOD2	5352	symbol	H. sapiens	5352	H. sapiens	0	0	0	0	0	0	0	0	0	0	0	0	0	0	0	0	0	0	0	0
SYDE1	85360	symbol	H. sapiens	85360	H. sapiens	0	0	0	0	0	1	0	0	0	0	0	0	0	0	0	0	0	0	0	0
VCL	7414	symbol	H. sapiens	7414	H. sapiens	0	1	0	1	1	0	1	0	0	1	1	0	1	1	0	0	0	1	0	0

## Sheet: Enrichment
GroupID	Category	Term	Description	LogP	Log(q-value)	Genes	Symbols	InTerm_InList
1_Summary	GO Biological Processes	GO:0001944	vasculature development	-16.4876	-12.2227	182,581,857,998,1277,1278,1281,1289,1464,1490,1909,1942,2028,2185,2247,2335,3726,4016,4017,4897,4915,5054,5156,6464,7045,7476,9037,10413,10630,58495,80781,81031,84168,1497,2909,4609,5058,10653,65009	JAG1,BAX,CAV1,CDC42,COL1A1,COL1A2,COL3A1,COL5A1,CSPG4,CCN2,EDNRA,EFNA1,ENPEP,PTK2B,FGF2,FN1,JUNB,LOXL1,LOXL2,NRCAM,NTRK2,SERPINE1,PDGFRA,SHC1,TGFBI,WNT7A,SEMA5A,YAP1,PDPN,OVOL2,COL18A1,SLC2A10,ANTXR1,CTNS,ARHGAP35,MYC,PAK1,SPINT2,NDRG4	39/-
1_Member	GO Biological Processes	GO:0001944	vasculature development	-16.4876	-12.2227	182,581,857,998,1277,1278,1281,1289,1464,1490,1909,1942,2028,2185,2247,2335,3726,4016,4017,4897,4915,5054,5156,6464,7045,7476,9037,10413,10630,58495,80781,81031,84168	JAG1,BAX,CAV1,CDC42,COL1A1,COL1A2,COL3A1,COL5A1,CSPG4,CCN2,EDNRA,EFNA1,ENPEP,PTK2B,FGF2,FN1,JUNB,LOXL1,LOXL2,NRCAM,NTRK2,SERPINE1,PDGFRA,SHC1,TGFBI,WNT7A,SEMA5A,YAP1,PDPN,OVOL2,COL18A1,SLC2A10,ANTXR1	33/554
1_Member	GO Biological Processes	GO:0001568	blood vessel development	-16.0924	-12.2227	182,581,857,998,1277,1278,1281,1289,1464,1490,1909,1942,2028,2185,2247,2335,3726,4016,4017,4897,4915,5054,5156,6464,7045,7476,9037,10413,58495,80781,81031,84168	JAG1,BAX,CAV1,CDC42,COL1A1,COL1A2,COL3A1,COL5A1,CSPG4,CCN2,EDNRA,EFNA1,ENPEP,PTK2B,FGF2,FN1,JUNB,LOXL1,LOXL2,NRCAM,NTRK2,SERPINE1,PDGFRA,SHC1,TGFBI,WNT7A,SEMA5A,YAP1,OVOL2,COL18A1,SLC2A10,ANTXR1	32/533
1_Member	GO Biological Processes	GO:0048514	blood vessel morphogenesis	-13.0464	-9.74109	182,581,857,998,1281,1464,1490,1909,1942,2028,2185,2247,2335,3726,4017,4897,4915,5054,5156,6464,7045,7476,9037,10413,58495,80781	JAG1,BAX,CAV1,CDC42,COL3A1,CSPG4,CCN2,EDNRA,EFNA1,ENPEP,PTK2B,FGF2,FN1,JUNB,LOXL2,NRCAM,NTRK2,SERPINE1,PDGFRA,SHC1,TGFBI,WNT7A,SEMA5A,YAP1,OVOL2,COL18A1	26/437
1_Member	GO Biological Processes	GO:0035239	tube morphogenesis	-13.0007	-9.73314	182,581,857,998,1281,1464,1490,1497,1909,1942,2028,2185,2247,2335,2909,3726,4017,4609,4897,4915,5054,5058,5156,6464,7045,7476,9037,10413,10653,58495,65009,80781	JAG1,BAX,CAV1,CDC42,COL3A1,CSPG4,CCN2,CTNS,EDNRA,EFNA1,ENPEP,PTK2B,FGF2,FN1,ARHGAP35,JUNB,LOXL2,MYC,NRCAM,NTRK2,SERPINE1,PAK1,PDGFRA,SHC1,TGFBI,WNT7A,SEMA5A,YAP1,SPINT2,OVOL2,NDRG4,COL18A1	32/688
1_Member	GO Biological Processes	GO:0001525	angiogenesis	-10.8368	-7.79114	182,857,998,1464,1490,1909,1942,2028,2185,2247,2335,4017,4897,5054,5156,6464,7045,7476,9037,58495,80781	JAG1,CAV1,CDC42,CSPG4,CCN2,EDNRA,EFNA1,ENPEP,PTK2B,FGF2,FN1,LOXL2,NRCAM,SERPINE1,PDGFRA,SHC1,TGFBI,WNT7A,SEMA5A,OVOL2,COL18A1	21/344
2_Summary	GO Biological Processes	GO:0000902	cell morphogenesis	-16.2034	-12.2227	998,1009,1909,1942,1996,2042,2909,3672,3913,3984,4744,4897,5058,5590,5800,6324,6507,7414,7476,8522,9037,9448,10413,10479,10507,10653,10763,23022,25861,56288,56924,59277,80781,91624,122786,221692,2185,4734,9721,23162,25879,1281,65009,91461	CDC42,CDH11,EDNRA,EFNA1,ELAVL4,EPHA3,ARHGAP35,ITGA1,LAMB2,LIMK1,NEFH,NRCAM,PAK1,PRKCZ,PTPRO,SCN1B,SLC1A3,VCL,WNT7A,GAS7,SEMA5A,MAP4K4,YAP1,SLC9A6,SEMA4D,SPINT2,NES,PALLD,WHRN,PARD3,PAK6,NTN4,COL18A1,NEXN,FRMD6,PHACTR1,PTK2B,NEDD4,GPRIN2,MAPK8IP3,DCAF13,COL3A1,NDRG4,PKDCC	44/-
2_Member	GO Biological Processes	GO:0000902	cell morphogenesis	-16.2034	-12.2227	998,1009,1909,1942,1996,2042,2909,3672,3913,3984,4744,4897,5058,5590,5800,6324,6507,7414,7476,8522,9037,9448,10413,10479,10507,10653,10763,23022,25861,56288,56924,59277,80781,91624,122786,221692	CDC42,CDH11,EDNRA,EFNA1,ELAVL4,EPHA3,ARHGAP35,ITGA1,LAMB2,LIMK1,NEFH,NRCAM,PAK1,PRKCZ,PTPRO,SCN1B,SLC1A3,VCL,WNT7A,GAS7,SEMA5A,MAP4K4,YAP1,SLC9A6,SEMA4D,SPINT2,NES,PALLD,WHRN,PARD3,PAK6,NTN4,COL18A1,NEXN,FRMD6,PHACTR1	36/687
2_Member	GO Biological Processes	GO:0048858	cell projection morphogenesis	-15.1896	-11.445	998,1009,1909,1942,1996,2042,2909,3672,3913,3984,4744,4897,5058,5590,5800,6324,7414,7476,8522,9037,9448,10479,10507,10763,23022,56288,56924,59277,91624,221692	CDC42,CDH11,EDNRA,EFNA1,ELAVL4,EPHA3,ARHGAP35,ITGA1,LAMB2,LIMK1,NEFH,NRCAM,PAK1,PRKCZ,PTPRO,SCN1B,VCL,WNT7A,GAS7,SEMA5A,MAP4K4,SLC9A6,SEMA4D,NES,PALLD,PARD3,PAK6,NTN4,NEXN,PHACTR1	30/496
2_Member	GO Biological Processes	GO:0048812	neuron projection morphogenesis	-14.5415	-10.9249	998,1009,1909,1942,1996,2042,2909,3672,3913,3984,4744,4897,5058,5590,5800,6324,7414,7476,8522,9037,9448,10479,10507,23022,56288,56924,59277,91624,221692	CDC42,CDH11,EDNRA,EFNA1,ELAVL4,EPHA3,ARHGAP35,ITGA1,LAMB2,LIMK1,NEFH,NRCAM,PAK1,PRKCZ,PTPRO,SCN1B,VCL,WNT7A,GAS7,SEMA5A,MAP4K4,SLC9A6,SEMA4D,PALLD,PARD3,PAK6,NTN4,NEXN,PHACTR1	29/486
2_Member	GO Biological Processes	GO:0031175	neuron projection development	-14.4523	-10.9249	998,1009,1909,1942,1996,2042,2185,2909,3672,3913,3984,4734,4744,4897,5058,5590,5800,6324,7414,7476,8522,9037,9448,9721,10479,10507,23022,23162,25861,56288,56924,59277,91624,221692	CDC42,CDH11,EDNRA,EFNA1,ELAVL4,EPHA3,PTK2B,ARHGAP35,ITGA1,LAMB2,LIMK1,NEDD4,NEFH,NRCAM,PAK1,PRKCZ,PTPRO,SCN1B,VCL,WNT7A,GAS7,SEMA5A,MAP4K4,GPRIN2,SLC9A6,SEMA4D,PALLD,MAPK8IP3,WHRN,PARD3,PAK6,NTN4,NEXN,PHACTR1	34/694
2_Member	GO Biological Processes	GO:0120039	plasma membrane bounded cell projection morphogenesis	-14.4266	-10.9249	998,1009,1909,1942,1996,2042,2909,3672,3913,3984,4744,4897,5058,5590,5800,6324,7414,7476,8522,9037,9448,10479,10507,23022,56288,56924,59277,91624,221692	CDC42,CDH11,EDNRA,EFNA1,ELAVL4,EPHA3,ARHGAP35,ITGA1,LAMB2,LIMK1,NEFH,NRCAM,PAK1,PRKCZ,PTPRO,SCN1B,VCL,WNT7A,GAS7,SEMA5A,MAP4K4,SLC9A6,SEMA4D,PALLD,PARD3,PAK6,NTN4,NEXN,PHACTR1	29/491
2_Member	GO Biological Processes	GO:0048667	cell morphogenesis involved in neuron differentiation	-12.0524	-8.96098	998,1009,1909,1942,1996,2042,2909,3913,3984,4744,4897,5800,6324,6507,7414,7476,9037,10479,10507,23022,25861,56288,59277,91624,221692	CDC42,CDH11,EDNRA,EFNA1,ELAVL4,EPHA3,ARHGAP35,LAMB2,LIMK1,NEFH,NRCAM,PTPRO,SCN1B,SLC1A3,VCL,WNT7A,SEMA5A,SLC9A6,SEMA4D,PALLD,WHRN,PARD3,NTN4,NEXN,PHACTR1	25/443
2_Member	GO Biological Processes	GO:0007409	axonogenesis	-9.49454	-6.65296	1009,1909,1942,2042,2909,3913,3984,4744,4897,5800,6324,7414,7476,9037,10479,10507,23022,56288,59277,91624	CDH11,EDNRA,EFNA1,EPHA3,ARHGAP35,LAMB2,LIMK1,NEFH,NRCAM,PTPRO,SCN1B,VCL,WNT7A,SEMA5A,SLC9A6,SEMA4D,PALLD,PARD3,NTN4,NEXN	20/366
2_Member	GO Biological Processes	GO:0061564	axon development	-9.22251	-6.41277	1009,1909,1942,2042,2909,3913,3984,4744,4897,5800,6324,7414,7476,9037,10479,10507,23022,23162,56288,59277,91624	CDH11,EDNRA,EFNA1,EPHA3,ARHGAP35,LAMB2,LIMK1,NEFH,NRCAM,PTPRO,SCN1B,VCL,WNT7A,SEMA5A,SLC9A6,SEMA4D,PALLD,MAPK8IP3,PARD3,NTN4,NEXN	21/421
2_Member	GO Biological Processes	GO:0007411	axon guidance	-6.66752	-4.26032	1909,1942,2042,2909,3913,4897,5800,6324,9037,10507,23022,59277,91624	EDNRA,EFNA1,EPHA3,ARHGAP35,LAMB2,NRCAM,PTPRO,SCN1B,SEMA5A,SEMA4D,PALLD,NTN4,NEXN	13/224
2_Member	GO Biological Processes	GO:0097485	neuron projection guidance	-6.64527	-4.24303	1909,1942,2042,2909,3913,4897,5800,6324,9037,10507,23022,59277,91624	EDNRA,EFNA1,EPHA3,ARHGAP35,LAMB2,NRCAM,PTPRO,SCN1B,SEMA5A,SEMA4D,PALLD,NTN4,NEXN	13/225
2_Member	GO Biological Processes	GO:1990138	neuron projection extension	-6.07459	-3.79606	1909,3913,3984,5590,7414,9037,10479,56924	EDNRA,LAMB2,LIMK1,PRKCZ,VCL,SEMA5A,SLC9A6,PAK6	8/80
2_Member	GO Biological Processes	GO:0048588	developmental cell growth	-5.88647	-3.63359	1909,3913,3984,5590,7414,9037,10479,25879,56924	EDNRA,LAMB2,LIMK1,PRKCZ,VCL,SEMA5A,SLC9A6,DCAF13,PAK6	9/114
2_Member	KEGG Pathway	hsa04360	Axon guidance	-5.85582	-3.6129	998,1942,2042,3984,5058,5590,9037,10507,56288,56924,59277	CDC42,EFNA1,EPHA3,LIMK1,PAK1,PRKCZ,SEMA5A,SEMA4D,PARD3,PAK6,NTN4	11/184
2_Member	GO Biological Processes	GO:0016049	cell growth	-5.82305	-3.59027	1909,3913,3984,5590,7414,9037,10479,25879,56924	EDNRA,LAMB2,LIMK1,PRKCZ,VCL,SEMA5A,SLC9A6,DCAF13,PAK6	9/116
2_Member	GO Biological Processes	GO:0048675	axon extension	-5.36863	-3.22056	1909,3913,3984,7414,9037,10479	EDNRA,LAMB2,LIMK1,VCL,SEMA5A,SLC9A6	6/46
2_Member	GO Biological Processes	GO:0060560	developmental growth involved in morphogenesis	-5.17366	-3.05502	1909,3913,3984,5590,7414,9037,10413,10479,56924	EDNRA,LAMB2,LIMK1,PRKCZ,VCL,SEMA5A,YAP1,SLC9A6,PAK6	9/139
2_Member	GO Biological Processes	GO:0040007	growth	-4.21538	-2.29026	1281,1909,3913,3984,5590,7414,7476,9037,10413,10479,25879,56924,65009,91461	COL3A1,EDNRA,LAMB2,LIMK1,PRKCZ,VCL,WNT7A,SEMA5A,YAP1,SLC9A6,DCAF13,PAK6,NDRG4,PKDCC	14/431
2_Member	GO Biological Processes	GO:0048589	developmental growth	-4.21538	-2.29026	1281,1909,3913,3984,5590,7414,7476,9037,10413,10479,25879,56924,65009,91461	COL3A1,EDNRA,LAMB2,LIMK1,PRKCZ,VCL,WNT7A,SEMA5A,YAP1,SLC9A6,DCAF13,PAK6,NDRG4,PKDCC	14/431
3_Summary	GO Biological Processes	GO:0043408	regulation of MAPK cascade	-14.2661	-10.8549	857,858,998,1464,1490,1880,1942,2185,2247,2335,3486,3672,4609,4915,5058,5156,5245,5590,6464,7476,9448,10125,10979,23005,23162,54209,55504,56924,65009,81848,201163,344558,768211,808,3984,5800,6546,8091,89801,116986,7525,8671,10507,1084,4744,10982,79839,152789	CAV1,CAV2,CDC42,CSPG4,CCN2,GPR183,EFNA1,PTK2B,FGF2,FN1,IGFBP3,ITGA1,MYC,NTRK2,PAK1,PDGFRA,PHB1,PRKCZ,SHC1,WNT7A,MAP4K4,RASGRP1,FERMT2,MAPKBP1,MAPK8IP3,TREM2,TNFRSF19,PAK6,NDRG4,SPRY4,FLCN,SH3RF3,RELL1,CALM3,LIMK1,PTPRO,SLC8A1,HMGA2,PPP1R3F,AGAP2,YES1,SLC4A4,SEMA4D,CEACAM3,NEFH,MAPRE2,CCDC102B,JAKMIP1	48/-
3_Member	GO Biological Processes	GO:0043408	regulation of MAPK cascade	-14.2661	-10.8549	857,858,998,1464,1490,1880,1942,2185,2247,2335,3486,3672,4609,4915,5058,5156,5245,5590,6464,7476,9448,10125,10979,23005,23162,54209,55504,56924,65009,81848,201163,344558,768211	CAV1,CAV2,CDC42,CSPG4,CCN2,GPR183,EFNA1,PTK2B,FGF2,FN1,IGFBP3,ITGA1,MYC,NTRK2,PAK1,PDGFRA,PHB1,PRKCZ,SHC1,WNT7A,MAP4K4,RASGRP1,FERMT2,MAPKBP1,MAPK8IP3,TREM2,TNFRSF19,PAK6,NDRG4,SPRY4,FLCN,SH3RF3,RELL1	33/661
3_Member	GO Biological Processes	GO:0043410	positive regulation of MAPK cascade	-12.3828	-9.24021	858,998,1464,1490,1880,1942,2185,2247,3486,3672,4915,5058,5156,5245,5590,6464,7476,10125,10979,23005,23162,54209,55504,65009,344558,768211	CAV2,CDC42,CSPG4,CCN2,GPR183,EFNA1,PTK2B,FGF2,IGFBP3,ITGA1,NTRK2,PAK1,PDGFRA,PHB1,PRKCZ,SHC1,WNT7A,RASGRP1,FERMT2,MAPKBP1,MAPK8IP3,TREM2,TNFRSF19,NDRG4,SH3RF3,RELL1	26/467
3_Member	GO Biological Processes	GO:0070374	positive regulation of ERK1 and ERK2 cascade	-6.49483	-4.12827	1490,1880,2185,2247,5156,5245,5590,6464,10125,10979,54209,65009	CCN2,GPR183,PTK2B,FGF2,PDGFRA,PHB1,PRKCZ,SHC1,RASGRP1,FERMT2,TREM2,NDRG4	12/194
3_Member	GO Biological Processes	GO:0070372	regulation of ERK1 and ERK2 cascade	-6.19954	-3.89024	1490,1880,2185,2247,2335,5156,5245,5590,6464,10125,10979,54209,65009,201163	CCN2,GPR183,PTK2B,FGF2,FN1,PDGFRA,PHB1,PRKCZ,SHC1,RASGRP1,FERMT2,TREM2,NDRG4,FLCN	14/288
3_Member	GO Biological Processes	GO:0051338	regulation of transferase activity	-5.70828	-3.49828	808,857,1942,2185,2247,3984,4609,4915,5058,5156,5245,5800,6546,8091,10125,10979,54209,81848,89801,116986	CALM3,CAV1,EFNA1,PTK2B,FGF2,LIMK1,MYC,NTRK2,PAK1,PDGFRA,PHB1,PTPRO,SLC8A1,HMGA2,RASGRP1,FERMT2,TREM2,SPRY4,PPP1R3F,AGAP2	20/623
3_Member	GO Biological Processes	GO:0033674	positive regulation of kinase activity	-5.37842	-3.22203	808,1942,2185,2247,4915,5058,5156,5245,8091,10125,10979,54209,116986	CALM3,EFNA1,PTK2B,FGF2,NTRK2,PAK1,PDGFRA,PHB1,HMGA2,RASGRP1,FERMT2,TREM2,AGAP2	13/292
3_Member	GO Biological Processes	GO:0043549	regulation of kinase activity	-5.06841	-2.96842	808,857,1942,2185,2247,4915,5058,5156,5245,5800,6546,8091,10125,10979,54209,81848,116986	CALM3,CAV1,EFNA1,PTK2B,FGF2,NTRK2,PAK1,PDGFRA,PHB1,PTPRO,SLC8A1,HMGA2,RASGRP1,FERMT2,TREM2,SPRY4,AGAP2	17/517
3_Member	GO Biological Processes	GO:0051347	positive regulation of transferase activity	-5.01941	-2.93276	808,1942,2185,2247,4609,4915,5058,5156,5245,8091,10125,10979,54209,116986	CALM3,EFNA1,PTK2B,FGF2,MYC,NTRK2,PAK1,PDGFRA,PHB1,HMGA2,RASGRP1,FERMT2,TREM2,AGAP2	14/364
3_Member	GO Biological Processes	GO:0010562	positive regulation of phosphorus metabolic process	-4.49499	-2.49851	808,857,1464,1942,2185,2247,3672,4915,5058,5156,5245,7525,8091,8671,10125,10507,10979,54209,116986	CALM3,CAV1,CSPG4,EFNA1,PTK2B,FGF2,ITGA1,NTRK2,PAK1,PDGFRA,PHB1,YES1,HMGA2,SLC4A4,RASGRP1,SEMA4D,FERMT2,TREM2,AGAP2	19/693
3_Member	GO Biological Processes	GO:0045937	positive regulation of phosphate metabolic process	-4.49499	-2.49851	808,857,1464,1942,2185,2247,3672,4915,5058,5156,5245,7525,8091,8671,10125,10507,10979,54209,116986	CALM3,CAV1,CSPG4,EFNA1,PTK2B,FGF2,ITGA1,NTRK2,PAK1,PDGFRA,PHB1,YES1,HMGA2,SLC4A4,RASGRP1,SEMA4D,FERMT2,TREM2,AGAP2	19/693
3_Member	GO Biological Processes	GO:0042327	positive regulation of phosphorylation	-4.13046	-2.22778	808,857,1464,1942,2185,2247,4915,5058,5156,5245,7525,8091,10125,10507,10979,54209,116986	CALM3,CAV1,CSPG4,EFNA1,PTK2B,FGF2,NTRK2,PAK1,PDGFRA,PHB1,YES1,HMGA2,RASGRP1,SEMA4D,FERMT2,TREM2,AGAP2	17/614
3_Member	GO Biological Processes	GO:0001934	positive regulation of protein phosphorylation	-3.9967	-2.12127	808,857,1464,1942,2185,2247,4915,5058,5245,7525,8091,10125,10507,10979,54209,116986	CALM3,CAV1,CSPG4,EFNA1,PTK2B,FGF2,NTRK2,PAK1,PHB1,YES1,HMGA2,RASGRP1,SEMA4D,FERMT2,TREM2,AGAP2	16/569
3_Member	GO Biological Processes	GO:0045859	regulation of protein kinase activity	-3.96701	-2.09886	808,857,1942,2185,2247,5058,5245,5800,6546,8091,10125,10979,81848,116986	CALM3,CAV1,EFNA1,PTK2B,FGF2,PAK1,PHB1,PTPRO,SLC8A1,HMGA2,RASGRP1,FERMT2,SPRY4,AGAP2	14/455
3_Member	GO Biological Processes	GO:0045860	positive regulation of protein kinase activity	-3.93959	-2.07574	808,1942,2185,2247,5058,5245,8091,10125,10979,116986	CALM3,EFNA1,PTK2B,FGF2,PAK1,PHB1,HMGA2,RASGRP1,FERMT2,AGAP2	10/246
3_Member	GO Biological Processes	GO:0031401	positive regulation of protein modification process	-3.09373	-1.37334	808,857,1464,1942,2185,2247,3672,4915,5058,5245,7525,8091,10125,10507,10979,54209,116986	CALM3,CAV1,CSPG4,EFNA1,PTK2B,FGF2,ITGA1,NTRK2,PAK1,PHB1,YES1,HMGA2,RASGRP1,SEMA4D,FERMT2,TREM2,AGAP2	17/755
3_Member	GO Biological Processes	GO:0071902	positive regulation of protein serine/threonine kinase activity	-2.95348	-1.26442	808,2247,5058,8091,10125,10979	CALM3,FGF2,PAK1,HMGA2,RASGRP1,FERMT2	6/124
3_Member	GO Molecular Functions	GO:0019901	protein kinase binding	-2.9152	-1.23771	808,857,858,998,1084,1464,2185,4744,5590,6464,10979,10982,23162,54209,79839,116986	CALM3,CAV1,CAV2,CDC42,CEACAM3,CSPG4,PTK2B,NEFH,PRKCZ,SHC1,FERMT2,MAPRE2,MAPK8IP3,TREM2,CCDC102B,AGAP2	16/715
3_Member	GO Molecular Functions	GO:0019900	kinase binding	-2.85816	-1.19448	808,857,858,998,1084,1464,2185,4744,5590,6464,10979,10982,23162,54209,79839,116986,152789	CALM3,CAV1,CAV2,CDC42,CEACAM3,CSPG4,PTK2B,NEFH,PRKCZ,SHC1,FERMT2,MAPRE2,MAPK8IP3,TREM2,CCDC102B,AGAP2,JAKMIP1	17/794
3_Member	GO Biological Processes	GO:0071900	regulation of protein serine/threonine kinase activity	-2.47341	-0.916966	808,2247,5058,6546,8091,10125,10979,81848	CALM3,FGF2,PAK1,SLC8A1,HMGA2,RASGRP1,FERMT2,SPRY4	8/262
4_Summary	GO Cellular Components	GO:0005925	focal adhesion	-14.2474	-10.8549	527,857,858,998,1266,1464,2185,3672,3984,4026,5058,6175,6464,7414,7525,8496,9448,10580,10979,10982,23022,25996,51466,54751,81848,91624,171024,2042,2909,3880,5590,7168,8522,25861,53405,54492,56203,59274,2036,7464,84168,221692	ATP6V0C,CAV1,CAV2,CDC42,CNN3,CSPG4,PTK2B,ITGA1,LIMK1,LPP,PAK1,RPLP0,SHC1,VCL,YES1,PPFIBP1,MAP4K4,SORBS1,FERMT2,MAPRE2,PALLD,REXO2,EVL,FBLIM1,SPRY4,NEXN,SYNPO2,EPHA3,ARHGAP35,KRT19,PRKCZ,TPM1,GAS7,WHRN,CLIC5,NEURL1B,LMOD3,TLNRD1,EPB41L1,CORO2A,ANTXR1,PHACTR1	42/-
4_Member	GO Cellular Components	GO:0005925	focal adhesion	-14.2474	-10.8549	527,857,858,998,1266,1464,2185,3672,3984,4026,5058,6175,6464,7414,7525,8496,9448,10580,10979,10982,23022,25996,51466,54751,81848,91624,171024	ATP6V0C,CAV1,CAV2,CDC42,CNN3,CSPG4,PTK2B,ITGA1,LIMK1,LPP,PAK1,RPLP0,SHC1,VCL,YES1,PPFIBP1,MAP4K4,SORBS1,FERMT2,MAPRE2,PALLD,REXO2,EVL,FBLIM1,SPRY4,NEXN,SYNPO2	27/424
4_Member	GO Cellular Components	GO:0030055	cell-substrate junction	-14.0012	-10.6545	527,857,858,998,1266,1464,2185,3672,3984,4026,5058,6175,6464,7414,7525,8496,9448,10580,10979,10982,23022,25996,51466,54751,81848,91624,171024	ATP6V0C,CAV1,CAV2,CDC42,CNN3,CSPG4,PTK2B,ITGA1,LIMK1,LPP,PAK1,RPLP0,SHC1,VCL,YES1,PPFIBP1,MAP4K4,SORBS1,FERMT2,MAPRE2,PALLD,REXO2,EVL,FBLIM1,SPRY4,NEXN,SYNPO2	27/434
4_Member	GO Cellular Components	GO:0015629	actin cytoskeleton	-9.02079	-6.26513	1266,2042,2909,3880,4026,5058,5590,7168,7414,7525,8522,10580,10979,23022,25861,51466,53405,54492,54751,56203,59274,91624,171024	CNN3,EPHA3,ARHGAP35,KRT19,LPP,PAK1,PRKCZ,TPM1,VCL,YES1,GAS7,SORBS1,FERMT2,PALLD,WHRN,EVL,CLIC5,NEURL1B,FBLIM1,LMOD3,TLNRD1,NEXN,SYNPO2	23/521
4_Member	GO Cellular Components	GO:0001725	stress fiber	-8.14288	-5.4774	4026,5590,7168,10580,10979,23022,51466,54751,59274,171024	LPP,PRKCZ,TPM1,SORBS1,FERMT2,PALLD,EVL,FBLIM1,TLNRD1,SYNPO2	10/85
4_Member	GO Cellular Components	GO:0097517	contractile actin filament bundle	-8.14288	-5.4774	4026,5590,7168,10580,10979,23022,51466,54751,59274,171024	LPP,PRKCZ,TPM1,SORBS1,FERMT2,PALLD,EVL,FBLIM1,TLNRD1,SYNPO2	10/85
4_Member	GO Cellular Components	GO:0042641	actomyosin	-7.85165	-5.22863	4026,5590,7168,10580,10979,23022,51466,54751,59274,171024	LPP,PRKCZ,TPM1,SORBS1,FERMT2,PALLD,EVL,FBLIM1,TLNRD1,SYNPO2	10/91
4_Member	GO Cellular Components	GO:0032432	actin filament bundle	-7.66934	-5.08604	4026,5590,7168,10580,10979,23022,51466,54751,59274,171024	LPP,PRKCZ,TPM1,SORBS1,FERMT2,PALLD,EVL,FBLIM1,TLNRD1,SYNPO2	10/95
4_Member	GO Molecular Functions	GO:0003779	actin binding	-5.40862	-3.24374	1266,2036,7168,7414,7464,8522,10580,10979,23022,51466,56203,59274,84168,91624,171024,221692	CNN3,EPB41L1,TPM1,VCL,CORO2A,GAS7,SORBS1,FERMT2,PALLD,EVL,LMOD3,TLNRD1,ANTXR1,NEXN,SYNPO2,PHACTR1	16/435
4_Member	GO Molecular Functions	GO:0051015	actin filament binding	-2.45378	-0.901539	1266,7168,7464,8522,10979,84168,91624	CNN3,TPM1,CORO2A,GAS7,FERMT2,ANTXR1,NEXN	7/208
5_Summary	GO Biological Processes	GO:0030198	extracellular matrix organization	-12.6991	-9.46776	857,858,1277,1278,1281,1289,1290,1303,3913,3915,4016,4017,4811,5156,7045,10653,55790,55959,59277,80781,81792,1292,1464,1490,2239,2335,5054,6678,10082,7476,57124,182,523,527,581,998,1978,3672,5590,9114,56288,3486,3488,80020,1942,1977,2247,4170,4609,4915,3684,7414	CAV1,CAV2,COL1A1,COL1A2,COL3A1,COL5A1,COL5A2,COL12A1,LAMB2,LAMC1,LOXL1,LOXL2,NID1,PDGFRA,TGFBI,SPINT2,CSGALNACT1,SULF2,NTN4,COL18A1,ADAMTS12,COL6A2,CSPG4,CCN2,GPC4,FN1,SERPINE1,SPARC,GPC6,WNT7A,CD248,JAG1,ATP6V1A,ATP6V0C,BAX,CDC42,EIF4EBP1,ITGA1,PRKCZ,ATP6V0D1,PARD3,IGFBP3,IGFBP5,FOXRED2,EFNA1,EIF4E,FGF2,MCL1,MYC,NTRK2,ITGAM,VCL	52/-
5_Member	GO Biological Processes	GO:0030198	extracellular matrix organization	-12.6991	-9.46776	857,858,1277,1278,1281,1289,1290,1303,3913,3915,4016,4017,4811,5156,7045,10653,55790,55959,59277,80781,81792	CAV1,CAV2,COL1A1,COL1A2,COL3A1,COL5A1,COL5A2,COL12A1,LAMB2,LAMC1,LOXL1,LOXL2,NID1,PDGFRA,TGFBI,SPINT2,CSGALNACT1,SULF2,NTN4,COL18A1,ADAMTS12	21/275
5_Member	GO Biological Processes	GO:0043062	extracellular structure organization	-12.6684	-9.46776	857,858,1277,1278,1281,1289,1290,1303,3913,3915,4016,4017,4811,5156,7045,10653,55790,55959,59277,80781,81792	CAV1,CAV2,COL1A1,COL1A2,COL3A1,COL5A1,COL5A2,COL12A1,LAMB2,LAMC1,LOXL1,LOXL2,NID1,PDGFRA,TGFBI,SPINT2,CSGALNACT1,SULF2,NTN4,COL18A1,ADAMTS12	21/276
5_Member	GO Biological Processes	GO:0045229	external encapsulating structure organization	-12.6377	-9.4671	857,858,1277,1278,1281,1289,1290,1303,3913,3915,4016,4017,4811,5156,7045,10653,55790,55959,59277,80781,81792	CAV1,CAV2,COL1A1,COL1A2,COL3A1,COL5A1,COL5A2,COL12A1,LAMB2,LAMC1,LOXL1,LOXL2,NID1,PDGFRA,TGFBI,SPINT2,CSGALNACT1,SULF2,NTN4,COL18A1,ADAMTS12	21/277
5_Member	GO Cellular Components	GO:0062023	collagen-containing extracellular matrix	-9.88435	-6.93556	1277,1278,1281,1289,1290,1292,1303,1464,1490,2239,2335,3913,3915,4016,4017,4811,5054,6678,7045,10082,59277,80781	COL1A1,COL1A2,COL3A1,COL5A1,COL5A2,COL6A2,COL12A1,CSPG4,CCN2,GPC4,FN1,LAMB2,LAMC1,LOXL1,LOXL2,NID1,SERPINE1,SPARC,TGFBI,GPC6,NTN4,COL18A1	22/428
5_Member	GO Cellular Components	GO:0031012	extracellular matrix	-9.83297	-6.91728	1277,1278,1281,1289,1290,1292,1303,1464,1490,2239,2335,3913,3915,4016,4017,4811,5054,6678,7045,7476,10082,57124,59277,80781,81792	COL1A1,COL1A2,COL3A1,COL5A1,COL5A2,COL6A2,COL12A1,CSPG4,CCN2,GPC4,FN1,LAMB2,LAMC1,LOXL1,LOXL2,NID1,SERPINE1,SPARC,TGFBI,WNT7A,GPC6,CD248,NTN4,COL18A1,ADAMTS12	25/562
5_Member	GO Cellular Components	GO:0030312	external encapsulating structure	-9.81685	-6.91728	1277,1278,1281,1289,1290,1292,1303,1464,1490,2239,2335,3913,3915,4016,4017,4811,5054,6678,7045,7476,10082,57124,59277,80781,81792	COL1A1,COL1A2,COL3A1,COL5A1,COL5A2,COL6A2,COL12A1,CSPG4,CCN2,GPC4,FN1,LAMB2,LAMC1,LOXL1,LOXL2,NID1,SERPINE1,SPARC,TGFBI,WNT7A,GPC6,CD248,NTN4,COL18A1,ADAMTS12	25/563
5_Member	GO Molecular Functions	GO:0005201	extracellular matrix structural constituent	-9.21542	-6.41277	1277,1278,1281,1289,1290,1292,1303,2335,3913,3915,4811,6678,7045,80781	COL1A1,COL1A2,COL3A1,COL5A1,COL5A2,COL6A2,COL12A1,FN1,LAMB2,LAMC1,NID1,SPARC,TGFBI,COL18A1	14/166
5_Member	GO Cellular Components	GO:0005604	basement membrane	-8.97641	-6.24247	1289,2335,3913,3915,4016,4017,4811,6678,7045,59277,80781	COL5A1,FN1,LAMB2,LAMC1,LOXL1,LOXL2,NID1,SPARC,TGFBI,NTN4,COL18A1	11/92
5_Member	KEGG Pathway	hsa05165	Human papillomavirus infection	-7.71632	-5.11779	182,523,527,581,998,1277,1278,1292,1978,2335,3672,3913,3915,5590,7476,9114,56288	JAG1,ATP6V1A,ATP6V0C,BAX,CDC42,COL1A1,COL1A2,COL6A2,EIF4EBP1,FN1,ITGA1,LAMB2,LAMC1,PRKCZ,WNT7A,ATP6V0D1,PARD3	17/333
5_Member	GO Cellular Components	GO:0005788	endoplasmic reticulum lumen	-6.52258	-4.14898	1277,1278,1281,1289,1290,1292,1303,2335,3486,3488,3913,3915,7476,80020,80781	COL1A1,COL1A2,COL3A1,COL5A1,COL5A2,COL6A2,COL12A1,FN1,IGFBP3,IGFBP5,LAMB2,LAMC1,WNT7A,FOXRED2,COL18A1	15/313
5_Member	KEGG Pathway	hsa04151	PI3K-Akt signaling pathway	-5.73143	-3.51824	1277,1278,1292,1942,1977,1978,2247,2335,3672,3913,3915,4170,4609,4915,5156	COL1A1,COL1A2,COL6A2,EFNA1,EIF4E,EIF4EBP1,FGF2,FN1,ITGA1,LAMB2,LAMC1,MCL1,MYC,NTRK2,PDGFRA	15/362
5_Member	KEGG Pathway	hsa05146	Amoebiasis	-5.24097	-3.10909	1277,1278,1281,2335,3684,3913,3915,7414	COL1A1,COL1A2,COL3A1,FN1,ITGAM,LAMB2,LAMC1,VCL	8/103
5_Member	KEGG Pathway	hsa04512	ECM-receptor interaction	-4.68874	-2.64737	1277,1278,1292,2335,3672,3913,3915	COL1A1,COL1A2,COL6A2,FN1,ITGA1,LAMB2,LAMC1	7/89
6_Summary	GO Biological Processes	GO:0097435	supramolecular fiber organization	-12.3133	-9.19705	581,998,1266,1277,1278,1281,1289,1290,1303,2185,3880,3883,3984,4016,4017,4744,5156,7168,8522,10409,10580,22902,51466,56203,80781,81792,84056,221692,283234,2036,2909,5058,6324,6464,10630,23022,23327,84168,85360,116986,122786,857,1490,4915,7476,9448,9659,9842,10507,10979,23400,51196,51375,171024,2042,9037,51571,10763,10982,91624,54209,5590,54751	BAX,CDC42,CNN3,COL1A1,COL1A2,COL3A1,COL5A1,COL5A2,COL12A1,PTK2B,KRT19,KRT33A,LIMK1,LOXL1,LOXL2,NEFH,PDGFRA,TPM1,GAS7,BASP1,SORBS1,RUFY3,EVL,LMOD3,COL18A1,ADAMTS12,KATNAL1,PHACTR1,CCDC88B,EPB41L1,ARHGAP35,PAK1,SCN1B,SHC1,PDPN,PALLD,NEDD4L,ANTXR1,SYDE1,AGAP2,FRMD6,CAV1,CCN2,NTRK2,WNT7A,MAP4K4,PDE4DIP,PLEKHM1,SEMA4D,FERMT2,ATP13A2,PLCE1,SNX7,SYNPO2,EPHA3,SEMA5A,CYRIB,NES,MAPRE2,NEXN,TREM2,PRKCZ,FBLI…	63/-
6_Member	GO Biological Processes	GO:0097435	supramolecular fiber organization	-12.3133	-9.19705	581,998,1266,1277,1278,1281,1289,1290,1303,2185,3880,3883,3984,4016,4017,4744,5156,7168,8522,10409,10580,22902,51466,56203,80781,81792,84056,221692,283234	BAX,CDC42,CNN3,COL1A1,COL1A2,COL3A1,COL5A1,COL5A2,COL12A1,PTK2B,KRT19,KRT33A,LIMK1,LOXL1,LOXL2,NEFH,PDGFRA,TPM1,GAS7,BASP1,SORBS1,RUFY3,EVL,LMOD3,COL18A1,ADAMTS12,KATNAL1,PHACTR1,CCDC88B	29/595
6_Member	GO Biological Processes	GO:0030029	actin filament-based process	-8.93904	-6.21556	998,1266,2036,2185,2909,3880,3984,5058,5156,6324,6464,7168,8522,10580,10630,22902,23022,23327,51466,56203,84168,85360,116986,122786,221692	CDC42,CNN3,EPB41L1,PTK2B,ARHGAP35,KRT19,LIMK1,PAK1,PDGFRA,SCN1B,SHC1,TPM1,GAS7,SORBS1,PDPN,RUFY3,PALLD,NEDD4L,EVL,LMOD3,ANTXR1,SYDE1,AGAP2,FRMD6,PHACTR1	25/621
6_Member	GO Biological Processes	GO:0044089	positive regulation of cellular component biogenesis	-7.68357	-5.09272	581,857,998,1490,2185,2909,3984,4915,5058,7168,7476,9448,9659,9842,10507,10979,23400,51196,51375,51466,171024	BAX,CAV1,CDC42,CCN2,PTK2B,ARHGAP35,LIMK1,NTRK2,PAK1,TPM1,WNT7A,MAP4K4,PDE4DIP,PLEKHM1,SEMA4D,FERMT2,ATP13A2,PLCE1,SNX7,EVL,SYNPO2	21/515
6_Member	GO Biological Processes	GO:0032970	regulation of actin filament-based process	-7.51667	-4.96234	857,998,1490,2042,2185,2909,3984,5058,5156,7168,9037,10630,10979,51466,51571,56203,122786,171024	CAV1,CDC42,CCN2,EPHA3,PTK2B,ARHGAP35,LIMK1,PAK1,PDGFRA,TPM1,SEMA5A,PDPN,FERMT2,EVL,CYRIB,LMOD3,FRMD6,SYNPO2	18/387
6_Member	GO Biological Processes	GO:0030036	actin cytoskeleton organization	-7.17244	-4.69495	998,1266,2036,2185,2909,3880,3984,5058,5156,6464,7168,8522,10580,22902,23022,51466,56203,84168,85360,116986,221692	CDC42,CNN3,EPB41L1,PTK2B,ARHGAP35,KRT19,LIMK1,PAK1,PDGFRA,SHC1,TPM1,GAS7,SORBS1,RUFY3,PALLD,EVL,LMOD3,ANTXR1,SYDE1,AGAP2,PHACTR1	21/552
6_Member	GO Biological Processes	GO:0032233	positive regulation of actin filament bundle assembly	-7.00129	-4.54666	998,1490,3984,5058,7168,10979,51466,171024	CDC42,CCN2,LIMK1,PAK1,TPM1,FERMT2,EVL,SYNPO2	8/61
6_Member	GO Biological Processes	GO:0051493	regulation of cytoskeleton organization	-6.87885	-4.44061	998,1490,2042,2185,2909,3984,5058,5156,7168,9037,9659,10763,10979,10982,51466,51571,56203,85360,91624,171024	CDC42,CCN2,EPHA3,PTK2B,ARHGAP35,LIMK1,PAK1,PDGFRA,TPM1,SEMA5A,PDE4DIP,NES,FERMT2,MAPRE2,EVL,CYRIB,LMOD3,SYDE1,NEXN,SYNPO2	20/524
6_Member	GO Biological Processes	GO:0051495	positive regulation of cytoskeleton organization	-6.74319	-4.33097	998,1490,2185,3984,5058,7168,9037,9659,10763,10979,51466,171024	CDC42,CCN2,PTK2B,LIMK1,PAK1,TPM1,SEMA5A,PDE4DIP,NES,FERMT2,EVL,SYNPO2	12/184
6_Member	GO Biological Processes	GO:0031032	actomyosin structure organization	-6.56426	-4.17658	1266,2036,2185,3880,3984,5156,7168,10580,56203,221692	CNN3,EPB41L1,PTK2B,KRT19,LIMK1,PDGFRA,TPM1,SORBS1,LMOD3,PHACTR1	10/124
6_Member	GO Biological Processes	GO:0051496	positive regulation of stress fiber assembly	-6.33229	-3.98989	998,1490,3984,5058,7168,10979,51466	CDC42,CCN2,LIMK1,PAK1,TPM1,FERMT2,EVL	7/51
6_Member	GO Biological Processes	GO:1902905	positive regulation of supramolecular fiber organization	-6.07026	-3.79542	998,1490,2185,3984,5058,7168,9037,9659,10979,51466,171024	CDC42,CCN2,PTK2B,LIMK1,PAK1,TPM1,SEMA5A,PDE4DIP,FERMT2,EVL,SYNPO2	11/175
6_Member	GO Biological Processes	GO:0032956	regulation of actin cytoskeleton organization	-5.98989	-3.72235	998,1490,2042,2185,2909,3984,5058,5156,7168,9037,10979,51466,51571,56203,171024	CDC42,CCN2,EPHA3,PTK2B,ARHGAP35,LIMK1,PAK1,PDGFRA,TPM1,SEMA5A,FERMT2,EVL,CYRIB,LMOD3,SYNPO2	15/345
6_Member	GO Biological Processes	GO:0110053	regulation of actin filament organization	-5.69845	-3.49474	998,1490,2185,2909,3984,5058,7168,9037,10979,51466,51571,56203,171024	CDC42,CCN2,PTK2B,ARHGAP35,LIMK1,PAK1,TPM1,SEMA5A,FERMT2,EVL,CYRIB,LMOD3,SYNPO2	13/273
6_Member	GO Biological Processes	GO:1902903	regulation of supramolecular fiber organization	-5.31094	-3.17104	998,1490,2185,2909,3984,5058,7168,9037,9659,10979,51466,51571,54209,56203,171024	CDC42,CCN2,PTK2B,ARHGAP35,LIMK1,PAK1,TPM1,SEMA5A,PDE4DIP,FERMT2,EVL,CYRIB,TREM2,LMOD3,SYNPO2	15/392
6_Member	GO Biological Processes	GO:0032231	regulation of actin filament bundle assembly	-5.11791	-3.01174	998,1490,3984,5058,7168,10979,51466,171024	CDC42,CCN2,LIMK1,PAK1,TPM1,FERMT2,EVL,SYNPO2	8/107
6_Member	GO Biological Processes	GO:0051492	regulation of stress fiber assembly	-4.53405	-2.51977	998,1490,3984,5058,7168,10979,51466	CDC42,CCN2,LIMK1,PAK1,TPM1,FERMT2,EVL	7/94
6_Member	GO Biological Processes	GO:0110020	regulation of actomyosin structure organization	-4.2248	-2.29638	998,1490,3984,5058,7168,10979,51466	CDC42,CCN2,LIMK1,PAK1,TPM1,FERMT2,EVL	7/105
6_Member	GO Biological Processes	GO:0007015	actin filament organization	-4.17332	-2.26117	998,1266,2185,3984,7168,8522,10580,22902,51466,56203,221692	CDC42,CNN3,PTK2B,LIMK1,TPM1,GAS7,SORBS1,RUFY3,EVL,LMOD3,PHACTR1	11/278
6_Member	GO Biological Processes	GO:0010638	positive regulation of organelle organization	-3.98428	-2.11031	581,998,1490,2185,2909,3984,5058,7168,9037,9659,10763,10979,51375,51466,171024	BAX,CDC42,CCN2,PTK2B,ARHGAP35,LIMK1,PAK1,TPM1,SEMA5A,PDE4DIP,NES,FERMT2,SNX7,EVL,SYNPO2	15/511
6_Member	GO Biological Processes	GO:0043254	regulation of protein-containing complex assembly	-3.17558	-1.43845	581,998,2185,5058,5590,9659,10979,51466,51571,54209,54751,56203	BAX,CDC42,PTK2B,PAK1,PRKCZ,PDE4DIP,FERMT2,EVL,CYRIB,TREM2,FBLIM1,LMOD3	12/422
7_Summary	GO Biological Processes	GO:0031589	cell-substrate adhesion	-11.6697	-8.60175	1009,1281,1490,1942,2185,2335,3672,3684,3915,4811,7414,8910,10580,10979,59277,81792,84168,1289,2247,3913,7045,998	CDH11,COL3A1,CCN2,EFNA1,PTK2B,FN1,ITGA1,ITGAM,LAMC1,NID1,VCL,SGCE,SORBS1,FERMT2,NTN4,ADAMTS12,ANTXR1,COL5A1,FGF2,LAMB2,TGFBI,CDC42	22/-
7_Member	GO Biological Processes	GO:0031589	cell-substrate adhesion	-11.6697	-8.60175	1009,1281,1490,1942,2185,2335,3672,3684,3915,4811,7414,8910,10580,10979,59277,81792,84168	CDH11,COL3A1,CCN2,EFNA1,PTK2B,FN1,ITGA1,ITGAM,LAMC1,NID1,VCL,SGCE,SORBS1,FERMT2,NTN4,ADAMTS12,ANTXR1	17/185
7_Member	GO Biological Processes	GO:0007160	cell-matrix adhesion	-9.1922	-6.40178	1009,1281,1490,2185,2335,3672,3684,4811,7414,8910,10580,10979,81792	CDH11,COL3A1,CCN2,PTK2B,FN1,ITGA1,ITGAM,NID1,VCL,SGCE,SORBS1,FERMT2,ADAMTS12	13/138
7_Member	GO Molecular Functions	GO:0005178	integrin binding	-5.59699	-3.41461	1281,1289,1490,2247,2335,3672,3684,3913,7045,10979	COL3A1,COL5A1,CCN2,FGF2,FN1,ITGA1,ITGAM,LAMB2,TGFBI,FERMT2	10/158
7_Member	GO Biological Processes	GO:0007229	integrin-mediated signaling pathway	-5.53915	-3.36561	998,1281,1490,2185,2335,3672,3684,10979	CDC42,COL3A1,CCN2,PTK2B,FN1,ITGA1,ITGAM,FERMT2	8/94
8_Summary	GO Biological Processes	GO:0120035	regulation of plasma membrane bounded cell projection organization	-10.7141	-7.68958	857,998,1608,1942,1996,2042,2185,2335,2909,3984,4734,4897,4915,5058,5800,6324,7476,9037,9842,10413,10507,10630,22902,23327,51196,51466,54209,65009,7003,80736,151835,2247,10409,3486,3488,5245,10235,8455,56262,1620,56288,5590,10125,56203	CAV1,CDC42,DGKG,EFNA1,ELAVL4,EPHA3,PTK2B,FN1,ARHGAP35,LIMK1,NEDD4,NRCAM,NTRK2,PAK1,PTPRO,SCN1B,WNT7A,SEMA5A,PLEKHM1,YAP1,SEMA4D,PDPN,RUFY3,NEDD4L,PLCE1,EVL,TREM2,NDRG4,TEAD1,SLC44A4,CPNE9,FGF2,BASP1,IGFBP3,IGFBP5,PHB1,RASGRP2,ATRN,LRRC8A,BRINP1,PARD3,PRKCZ,RASGRP1,LMOD3	44/-
8_Member	GO Biological Processes	GO:0120035	regulation of plasma membrane bounded cell projection organization	-10.7141	-7.68958	857,998,1608,1942,1996,2042,2185,2335,2909,3984,4734,4897,4915,5058,5800,6324,7476,9037,9842,10413,10507,10630,22902,23327,51196,51466,54209,65009	CAV1,CDC42,DGKG,EFNA1,ELAVL4,EPHA3,PTK2B,FN1,ARHGAP35,LIMK1,NEDD4,NRCAM,NTRK2,PAK1,PTPRO,SCN1B,WNT7A,SEMA5A,PLEKHM1,YAP1,SEMA4D,PDPN,RUFY3,NEDD4L,PLCE1,EVL,TREM2,NDRG4	28/645
8_Member	GO Biological Processes	GO:0031344	regulation of cell projection organization	-10.452	-7.44769	857,998,1608,1942,1996,2042,2185,2335,2909,3984,4734,4897,4915,5058,5800,6324,7476,9037,9842,10413,10507,10630,22902,23327,51196,51466,54209,65009	CAV1,CDC42,DGKG,EFNA1,ELAVL4,EPHA3,PTK2B,FN1,ARHGAP35,LIMK1,NEDD4,NRCAM,NTRK2,PAK1,PTPRO,SCN1B,WNT7A,SEMA5A,PLEKHM1,YAP1,SEMA4D,PDPN,RUFY3,NEDD4L,PLCE1,EVL,TREM2,NDRG4	28/662
8_Member	GO Biological Processes	GO:0010975	regulation of neuron projection development	-8.04125	-5.40209	1608,1942,1996,2042,2185,2335,2909,3984,4734,4897,4915,5058,5800,6324,7476,9037,10507,22902,23327,65009	DGKG,EFNA1,ELAVL4,EPHA3,PTK2B,FN1,ARHGAP35,LIMK1,NEDD4,NRCAM,NTRK2,PAK1,PTPRO,SCN1B,WNT7A,SEMA5A,SEMA4D,RUFY3,NEDD4L,NDRG4	20/445
8_Member	GO Biological Processes	GO:0030307	positive regulation of cell growth	-7.35013	-4.82626	998,2185,2335,3984,7003,9037,10413,10507,22902,23327,80736,151835	CDC42,PTK2B,FN1,LIMK1,TEAD1,SEMA5A,YAP1,SEMA4D,RUFY3,NEDD4L,SLC44A4,CPNE9	12/162
8_Member	GO Biological Processes	GO:0045927	positive regulation of growth	-6.77688	-4.35443	998,2185,2247,2335,3984,7003,9037,10409,10413,10507,22902,23327,80736,151835	CDC42,PTK2B,FGF2,FN1,LIMK1,TEAD1,SEMA5A,BASP1,YAP1,SEMA4D,RUFY3,NEDD4L,SLC44A4,CPNE9	14/258
8_Member	GO Biological Processes	GO:0001558	regulation of cell growth	-6.54402	-4.16268	998,2185,2335,3486,3488,3984,4897,5245,7003,9037,10235,10413,10507,22902,23327,80736,151835	CDC42,PTK2B,FN1,IGFBP3,IGFBP5,LIMK1,NRCAM,PHB1,TEAD1,SEMA5A,RASGRP2,YAP1,SEMA4D,RUFY3,NEDD4L,SLC44A4,CPNE9	17/402
8_Member	GO Biological Processes	GO:0050770	regulation of axonogenesis	-6.04666	-3.77548	1942,2335,2909,3984,4915,5058,7476,9037,10507,22902	EFNA1,FN1,ARHGAP35,LIMK1,NTRK2,PAK1,WNT7A,SEMA5A,SEMA4D,RUFY3	10/141
8_Member	GO Biological Processes	GO:0040008	regulation of growth	-5.87994	-3.63359	998,2185,2247,2335,3486,3488,3984,4897,5245,7003,8455,9037,10235,10409,10413,10507,22902,23327,80736,151835	CDC42,PTK2B,FGF2,FN1,IGFBP3,IGFBP5,LIMK1,NRCAM,PHB1,TEAD1,ATRN,SEMA5A,RASGRP2,BASP1,YAP1,SEMA4D,RUFY3,NEDD4L,SLC44A4,CPNE9	20/607
8_Member	GO Biological Processes	GO:0031346	positive regulation of cell projection organization	-5.74621	-3.52982	998,1996,2042,2185,2335,2909,3984,4915,6324,9037,9842,10507,22902,51196,65009	CDC42,ELAVL4,EPHA3,PTK2B,FN1,ARHGAP35,LIMK1,NTRK2,SCN1B,SEMA5A,PLEKHM1,SEMA4D,RUFY3,PLCE1,NDRG4	15/361
8_Member	GO Biological Processes	GO:0048639	positive regulation of developmental growth	-5.33529	-3.18996	2247,2335,3984,9037,10409,10413,10507,22902,23327,151835	FGF2,FN1,LIMK1,SEMA5A,BASP1,YAP1,SEMA4D,RUFY3,NEDD4L,CPNE9	10/169
8_Member	GO Biological Processes	GO:0048638	regulation of developmental growth	-4.30296	-2.36107	2247,2335,3984,4897,8455,9037,10409,10413,10507,22902,23327,151835	FGF2,FN1,LIMK1,NRCAM,ATRN,SEMA5A,BASP1,YAP1,SEMA4D,RUFY3,NEDD4L,CPNE9	12/318
8_Member	GO Biological Processes	GO:0050772	positive regulation of axonogenesis	-4.07027	-2.182	2335,3984,4915,9037,10507,22902	FN1,LIMK1,NTRK2,SEMA5A,SEMA4D,RUFY3	6/77
8_Member	GO Biological Processes	GO:0008361	regulation of cell size	-3.616	-1.81086	2335,2909,3984,4897,9037,10507,22902,56262	FN1,ARHGAP35,LIMK1,NRCAM,SEMA5A,SEMA4D,RUFY3,LRRC8A	8/174
8_Member	GO Biological Processes	GO:0061387	regulation of extent of cell growth	-3.56683	-1.77156	2335,3984,4897,9037,10507,22902	FN1,LIMK1,NRCAM,SEMA5A,SEMA4D,RUFY3	6/95
8_Member	GO Biological Processes	GO:0045773	positive regulation of axon extension	-3.41542	-1.64389	2335,3984,9037,22902	FN1,LIMK1,SEMA5A,RUFY3	4/37
8_Member	GO Biological Processes	GO:0030516	regulation of axon extension	-3.08301	-1.36976	2335,3984,4897,9037,22902	FN1,LIMK1,NRCAM,SEMA5A,RUFY3	5/78
8_Member	GO Biological Processes	GO:0050767	regulation of neurogenesis	-3.01758	-1.31921	1620,2247,2335,3984,4915,7476,9037,10413,10507,22902,54209	BRINP1,FGF2,FN1,LIMK1,NTRK2,WNT7A,SEMA5A,YAP1,SEMA4D,RUFY3,TREM2	11/380
8_Member	GO Biological Processes	GO:0051960	regulation of nervous system development	-2.86317	-1.19768	1620,2247,2335,3984,4915,7476,9037,10413,10507,22902,54209,56288	BRINP1,FGF2,FN1,LIMK1,NTRK2,WNT7A,SEMA5A,YAP1,SEMA4D,RUFY3,TREM2,PARD3	12/459
8_Member	GO Biological Processes	GO:0010720	positive regulation of cell development	-2.38224	-0.846425	2247,2335,3984,4915,5590,9037,10125,10507,22902,54209,56203	FGF2,FN1,LIMK1,NTRK2,PRKCZ,SEMA5A,RASGRP1,SEMA4D,RUFY3,TREM2,LMOD3	11/459
8_Member	GO Biological Processes	GO:0051962	positive regulation of nervous system development	-2.16047	-0.675881	2247,2335,3984,4915,7476,9037,10507,22902	FGF2,FN1,LIMK1,NTRK2,WNT7A,SEMA5A,SEMA4D,RUFY3	8/296
8_Member	GO Biological Processes	GO:0050769	positive regulation of neurogenesis	-2.06515	-0.612494	2247,2335,3984,4915,9037,10507,22902	FGF2,FN1,LIMK1,NTRK2,SEMA5A,SEMA4D,RUFY3	7/246
9_Summary	GO Biological Processes	GO:0008283	cell population proliferation	-10.3204	-7.33543	581,857,858,1281,1490,1909,2028,2185,2247,3486,3488,3664,3726,4017,7031,7045,7476,8091,9037,10125,10413,10763,54209,57124,58495,65009,84858,116039,201163,182,998,3915,4609,6678,55959,3672,5058,5245,7168,10630,10653,80781	BAX,CAV1,CAV2,COL3A1,CCN2,EDNRA,ENPEP,PTK2B,FGF2,IGFBP3,IGFBP5,IRF6,JUNB,LOXL2,TFF1,TGFBI,WNT7A,HMGA2,SEMA5A,RASGRP1,YAP1,NES,TREM2,CD248,OVOL2,NDRG4,ZNF503,OSR2,FLCN,JAG1,CDC42,LAMC1,MYC,SPARC,SULF2,ITGA1,PAK1,PHB1,TPM1,PDPN,SPINT2,COL18A1	42/-
9_Member	GO Biological Processes	GO:0008283	cell population proliferation	-10.3204	-7.33543	581,857,858,1281,1490,1909,2028,2185,2247,3486,3488,3664,3726,4017,7031,7045,7476,8091,9037,10125,10413,10763,54209,57124,58495,65009,84858,116039,201163	BAX,CAV1,CAV2,COL3A1,CCN2,EDNRA,ENPEP,PTK2B,FGF2,IGFBP3,IGFBP5,IRF6,JUNB,LOXL2,TFF1,TGFBI,WNT7A,HMGA2,SEMA5A,RASGRP1,YAP1,NES,TREM2,CD248,OVOL2,NDRG4,ZNF503,OSR2,FLCN	29/719
9_Member	GO Biological Processes	GO:0050678	regulation of epithelial cell proliferation	-6.4541	-4.0986	182,581,857,858,998,2247,3664,3915,4609,6678,7476,9037,10413,55959,58495,116039,201163	JAG1,BAX,CAV1,CAV2,CDC42,FGF2,IRF6,LAMC1,MYC,SPARC,WNT7A,SEMA5A,YAP1,SULF2,OVOL2,OSR2,FLCN	17/408
9_Member	GO Biological Processes	GO:0050673	epithelial cell proliferation	-6.09489	-3.81262	581,857,858,2247,3486,3488,3664,4017,9037,10413,201163	BAX,CAV1,CAV2,FGF2,IGFBP3,IGFBP5,IRF6,LOXL2,SEMA5A,YAP1,FLCN	11/174
9_Member	GO Biological Processes	GO:0008285	negative regulation of cell population proliferation	-5.75222	-3.5326	581,857,858,2185,2247,3486,3488,3664,3672,4609,5058,5245,6678,7031,7168,10630,10653,54209,58495,65009,80781,84858,201163	BAX,CAV1,CAV2,PTK2B,FGF2,IGFBP3,IGFBP5,IRF6,ITGA1,MYC,PAK1,PHB1,SPARC,TFF1,TPM1,PDPN,SPINT2,TREM2,OVOL2,NDRG4,COL18A1,ZNF503,FLCN	23/791
9_Member	GO Biological Processes	GO:0001935	endothelial cell proliferation	-4.63306	-2.6044	857,858,2247,4017,9037	CAV1,CAV2,FGF2,LOXL2,SEMA5A	5/37
9_Member	GO Biological Processes	GO:0050679	positive regulation of epithelial cell proliferation	-3.62024	-1.81133	858,998,2247,3915,4609,7476,9037,10413,116039	CAV2,CDC42,FGF2,LAMC1,MYC,WNT7A,SEMA5A,YAP1,OSR2	9/220
10_Summary	KEGG Pathway	hsa04510	Focal adhesion	-10.009	-7.04247	857,858,998,1277,1278,1292,2335,2909,3672,3913,3915,5058,5156,6464,7414,56924,2247,4609,7476,51196,117581,3684,3984	CAV1,CAV2,CDC42,COL1A1,COL1A2,COL6A2,FN1,ARHGAP35,ITGA1,LAMB2,LAMC1,PAK1,PDGFRA,SHC1,VCL,PAK6,FGF2,MYC,WNT7A,PLCE1,TWIST2,ITGAM,LIMK1	23/-
10_Member	KEGG Pathway	hsa04510	Focal adhesion	-10.009	-7.04247	857,858,998,1277,1278,1292,2335,2909,3672,3913,3915,5058,5156,6464,7414,56924	CAV1,CAV2,CDC42,COL1A1,COL1A2,COL6A2,FN1,ARHGAP35,ITGA1,LAMB2,LAMC1,PAK1,PDGFRA,SHC1,VCL,PAK6	16/203
10_Member	KEGG Pathway	hsa05205	Proteoglycans in cancer	-6.26116	-3.94382	857,858,998,1277,1278,2247,2335,4609,5058,7476,51196,117581	CAV1,CAV2,CDC42,COL1A1,COL1A2,FGF2,FN1,MYC,PAK1,WNT7A,PLCE1,TWIST2	12/204
10_Member	KEGG Pathway	hsa04810	Regulation of actin cytoskeleton	-4.92671	-2.8495	998,2247,2335,2909,3672,3684,3984,5058,5156,7414,56924	CDC42,FGF2,FN1,ARHGAP35,ITGA1,ITGAM,LIMK1,PAK1,PDGFRA,VCL,PAK6	11/230
10_Member	KEGG Pathway	hsa05100	Bacterial invasion of epithelial cells	-4.03888	-2.1557	857,858,998,2335,6464,7414	CAV1,CAV2,CDC42,FN1,SHC1,VCL	6/78
11_Summary	GO Biological Processes	GO:0009611	response to wounding	-9.82675	-6.91728	581,1281,1289,1490,1608,1909,2247,2335,2909,3913,5058,5156,6507,7035,7168,7414,7476,10413,10630,23162,54209,55959,857,1497,5054,5800,1840,1880,2185,3684,5245,10125,56262	BAX,COL3A1,COL5A1,CCN2,DGKG,EDNRA,FGF2,FN1,ARHGAP35,LAMB2,PAK1,PDGFRA,SLC1A3,TFPI,TPM1,VCL,WNT7A,YAP1,PDPN,MAPK8IP3,TREM2,SULF2,CAV1,CTNS,SERPINE1,PTPRO,DTX1,GPR183,PTK2B,ITGAM,PHB1,RASGRP1,LRRC8A	33/-
11_Member	GO Biological Processes	GO:0009611	response to wounding	-9.82675	-6.91728	581,1281,1289,1490,1608,1909,2247,2335,2909,3913,5058,5156,6507,7035,7168,7414,7476,10413,10630,23162,54209,55959	BAX,COL3A1,COL5A1,CCN2,DGKG,EDNRA,FGF2,FN1,ARHGAP35,LAMB2,PAK1,PDGFRA,SLC1A3,TFPI,TPM1,VCL,WNT7A,YAP1,PDPN,MAPK8IP3,TREM2,SULF2	22/431
11_Member	GO Biological Processes	GO:0042060	wound healing	-5.64414	-3.45878	1281,1289,1608,2247,2335,2909,5058,5156,7035,7168,7414,7476,10413,10630	COL3A1,COL5A1,DGKG,FGF2,FN1,ARHGAP35,PAK1,PDGFRA,TFPI,TPM1,VCL,WNT7A,YAP1,PDPN	14/321
11_Member	GO Biological Processes	GO:0050878	regulation of body fluid levels	-2.70463	-1.0895	857,1281,1497,1608,5054,5156,5800,7035,7414,10630	CAV1,COL3A1,CTNS,DGKG,SERPINE1,PDGFRA,PTPRO,TFPI,VCL,PDPN	10/355
11_Member	GO Biological Processes	GO:0030168	platelet activation	-2.60278	-1.00811	1281,1608,5156,7414,10630	COL3A1,DGKG,PDGFRA,VCL,PDPN	5/100
11_Member	GO Biological Processes	GO:0001775	cell activation	-2.41774	-0.873101	581,1281,1608,1840,1880,2185,3684,5156,5245,7414,7476,10125,10630,54209,56262	BAX,COL3A1,DGKG,DTX1,GPR183,PTK2B,ITGAM,PDGFRA,PHB1,VCL,WNT7A,RASGRP1,PDPN,TREM2,LRRC8A	15/730
11_Member	GO Biological Processes	GO:0007596	blood coagulation	-2.21024	-0.717214	1281,1608,5156,7035,7414,10630	COL3A1,DGKG,PDGFRA,TFPI,VCL,PDPN	6/175
11_Member	GO Biological Processes	GO:0050817	coagulation	-2.18684	-0.69624	1281,1608,5156,7035,7414,10630	COL3A1,DGKG,PDGFRA,TFPI,VCL,PDPN	6/177
11_Member	GO Biological Processes	GO:0007599	hemostasis	-2.14105	-0.662383	1281,1608,5156,7035,7414,10630	COL3A1,DGKG,PDGFRA,TFPI,VCL,PDPN	6/181
12_Summary	GO Biological Processes	GO:0032835	glomerulus development	-9.7476	-6.86328	182,1909,2028,3913,4811,5156,5800,10409,51196,55959,1497,2247,4609,581,116039,201163	JAG1,EDNRA,ENPEP,LAMB2,NID1,PDGFRA,PTPRO,BASP1,PLCE1,SULF2,CTNS,FGF2,MYC,BAX,OSR2,FLCN	16/-
12_Member	GO Biological Processes	GO:0032835	glomerulus development	-9.7476	-6.86328	182,1909,2028,3913,4811,5156,5800,10409,51196,55959	JAG1,EDNRA,ENPEP,LAMB2,NID1,PDGFRA,PTPRO,BASP1,PLCE1,SULF2	10/59
12_Member	GO Biological Processes	GO:0072006	nephron development	-9.11443	-6.33591	182,1497,1909,2028,2247,3913,4609,4811,5156,5800,10409,51196,55959	JAG1,CTNS,EDNRA,ENPEP,FGF2,LAMB2,MYC,NID1,PDGFRA,PTPRO,BASP1,PLCE1,SULF2	13/140
12_Member	GO Biological Processes	GO:0001822	kidney development	-7.47876	-4.93137	182,581,1497,1909,2028,2247,3913,4609,4811,5156,5800,10409,51196,55959,116039,201163	JAG1,BAX,CTNS,EDNRA,ENPEP,FGF2,LAMB2,MYC,NID1,PDGFRA,PTPRO,BASP1,PLCE1,SULF2,OSR2,FLCN	16/304
12_Member	GO Biological Processes	GO:0072001	renal system development	-7.28433	-4.78886	182,581,1497,1909,2028,2247,3913,4609,4811,5156,5800,10409,51196,55959,116039,201163	JAG1,BAX,CTNS,EDNRA,ENPEP,FGF2,LAMB2,MYC,NID1,PDGFRA,PTPRO,BASP1,PLCE1,SULF2,OSR2,FLCN	16/314
12_Member	GO Biological Processes	GO:0061318	renal filtration cell differentiation	-5.80222	-3.57607	182,1909,3913,5800,10409	JAG1,EDNRA,LAMB2,PTPRO,BASP1	5/22
12_Member	GO Biological Processes	GO:0072112	podocyte differentiation	-5.80222	-3.57607	182,1909,3913,5800,10409	JAG1,EDNRA,LAMB2,PTPRO,BASP1	5/22
12_Member	GO Biological Processes	GO:0072311	glomerular epithelial cell differentiation	-5.69908	-3.49474	182,1909,3913,5800,10409	JAG1,EDNRA,LAMB2,PTPRO,BASP1	5/23
12_Member	GO Biological Processes	GO:0072010	glomerular epithelium development	-5.41791	-3.25016	182,1909,3913,5800,10409	JAG1,EDNRA,LAMB2,PTPRO,BASP1	5/26
12_Member	GO Biological Processes	GO:0072009	nephron epithelium development	-5.02905	-2.94	182,1497,1909,2247,3913,4609,5800,10409	JAG1,CTNS,EDNRA,FGF2,LAMB2,MYC,PTPRO,BASP1	8/110
12_Member	GO Biological Processes	GO:0035850	epithelial cell differentiation involved in kidney development	-4.63306	-2.6044	182,1909,3913,5800,10409	JAG1,EDNRA,LAMB2,PTPRO,BASP1	5/37
12_Member	GO Biological Processes	GO:0072073	kidney epithelium development	-4.24902	-2.31559	182,1497,1909,2247,3913,4609,5800,10409	JAG1,CTNS,EDNRA,FGF2,LAMB2,MYC,PTPRO,BASP1	8/141
12_Member	GO Biological Processes	GO:0061005	cell differentiation involved in kidney development	-4.11969	-2.21857	182,1909,3913,5800,10409	JAG1,EDNRA,LAMB2,PTPRO,BASP1	5/47
12_Member	GO Biological Processes	GO:0001656	metanephros development	-2.08025	-0.621744	3913,5156,10409,116039	LAMB2,PDGFRA,BASP1,OSR2	4/85
13_Summary	GO Biological Processes	GO:0030199	collagen fibril organization	-9.59778	-6.72818	1277,1278,1281,1289,1290,1303,4016,4017,80781,81792,1490,3486,3488,4915,5156,6272,6464,199713,1292,2335,3672,4811,7168,7414,8910,56203,171024,581,998,5054,5590,51196,6546,857,858,7476,7525,10979,201163,22849,4155,2909,10125,10235,8091,59277,11030	COL1A1,COL1A2,COL3A1,COL5A1,COL5A2,COL12A1,LOXL1,LOXL2,COL18A1,ADAMTS12,CCN2,IGFBP3,IGFBP5,NTRK2,PDGFRA,SORT1,SHC1,NLRP7,COL6A2,FN1,ITGA1,NID1,TPM1,VCL,SGCE,LMOD3,SYNPO2,BAX,CDC42,SERPINE1,PRKCZ,PLCE1,SLC8A1,CAV1,CAV2,WNT7A,YES1,FERMT2,FLCN,CPEB3,MBP,ARHGAP35,RASGRP1,RASGRP2,HMGA2,NTN4,RBPMS	47/-
13_Member	GO Biological Processes	GO:0030199	collagen fibril organization	-9.59778	-6.72818	1277,1278,1281,1289,1290,1303,4016,4017,80781,81792	COL1A1,COL1A2,COL3A1,COL5A1,COL5A2,COL12A1,LOXL1,LOXL2,COL18A1,ADAMTS12	10/61
13_Member	GO Molecular Functions	GO:0019838	growth factor binding	-8.24083	-5.55686	1277,1278,1281,1289,1490,3486,3488,4915,5156,6272,6464,199713	COL1A1,COL1A2,COL3A1,COL5A1,CCN2,IGFBP3,IGFBP5,NTRK2,PDGFRA,SORT1,SHC1,NLRP7	12/135
13_Member	GO Molecular Functions	GO:0030020	extracellular matrix structural constituent conferring tensile strength	-8.08075	-5.433	1277,1278,1281,1289,1290,1292,1303,80781	COL1A1,COL1A2,COL3A1,COL5A1,COL5A2,COL6A2,COL12A1,COL18A1	8/45
13_Member	GO Molecular Functions	GO:0048407	platelet-derived growth factor binding	-7.52154	-4.96234	1277,1278,1281,1289,5156	COL1A1,COL1A2,COL3A1,COL5A1,PDGFRA	5/11
13_Member	KEGG Pathway	hsa04820	Cytoskeleton in muscle cells	-7.34691	-4.82626	1277,1278,1281,1289,1290,1292,2335,3672,4811,7168,7414,8910,56203,171024	COL1A1,COL1A2,COL3A1,COL5A1,COL5A2,COL6A2,FN1,ITGA1,NID1,TPM1,VCL,SGCE,LMOD3,SYNPO2	14/232
13_Member	GO Cellular Components	GO:0005583	fibrillar collagen trimer	-7.29079	-4.78916	1277,1278,1281,1289,1290	COL1A1,COL1A2,COL3A1,COL5A1,COL5A2	5/12
13_Member	GO Cellular Components	GO:0098643	banded collagen fibril	-7.29079	-4.78916	1277,1278,1281,1289,1290	COL1A1,COL1A2,COL3A1,COL5A1,COL5A2	5/12
13_Member	KEGG Pathway	hsa04933	AGE-RAGE signaling pathway in diabetic complications	-6.33254	-3.98989	581,998,1277,1278,1281,2335,5054,5590,51196	BAX,CDC42,COL1A1,COL1A2,COL3A1,FN1,SERPINE1,PRKCZ,PLCE1	9/101
13_Member	KEGG Pathway	hsa04974	Protein digestion and absorption	-6.18859	-3.88326	1277,1278,1281,1289,1290,1292,1303,6546,80781	COL1A1,COL1A2,COL3A1,COL5A1,COL5A2,COL6A2,COL12A1,SLC8A1,COL18A1	9/105
13_Member	GO Cellular Components	GO:0098644	complex of collagen trimers	-5.91087	-3.65051	1277,1278,1281,1289,1290	COL1A1,COL1A2,COL3A1,COL5A1,COL5A2	5/21
13_Member	GO Cellular Components	GO:0005581	collagen trimer	-5.833	-3.59687	1277,1278,1281,1289,1290,1292,1303,80781	COL1A1,COL1A2,COL3A1,COL5A1,COL5A2,COL6A2,COL12A1,COL18A1	8/86
13_Member	GO Biological Processes	GO:0071560	cellular response to transforming growth factor beta stimulus	-4.66071	-2.62574	857,858,1277,1278,1281,7476,7525,10979,201163	CAV1,CAV2,COL1A1,COL1A2,COL3A1,WNT7A,YES1,FERMT2,FLCN	9/161
13_Member	GO Biological Processes	GO:0071230	cellular response to amino acid stimulus	-4.65702	-2.62416	1277,1278,1281,1290,4915,5156,22849	COL1A1,COL1A2,COL3A1,COL5A2,NTRK2,PDGFRA,CPEB3	7/90
13_Member	GO Biological Processes	GO:0071559	response to transforming growth factor beta	-4.51475	-2.5054	857,858,1277,1278,1281,7476,7525,10979,201163	CAV1,CAV2,COL1A1,COL1A2,COL3A1,WNT7A,YES1,FERMT2,FLCN	9/168
13_Member	GO Biological Processes	GO:0071229	cellular response to acid chemical	-4.38856	-2.41842	1277,1278,1281,1290,4915,5156,22849	COL1A1,COL1A2,COL3A1,COL5A2,NTRK2,PDGFRA,CPEB3	7/99
13_Member	GO Molecular Functions	GO:0002020	protease binding	-4.31525	-2.36647	1277,1278,1281,2335,4155,4915,5054,199713	COL1A1,COL1A2,COL3A1,FN1,MBP,NTRK2,SERPINE1,NLRP7	8/138
13_Member	GO Biological Processes	GO:0001101	response to acid chemical	-4.20578	-2.28394	1277,1278,1281,1290,4915,5156,22849,80781	COL1A1,COL1A2,COL3A1,COL5A2,NTRK2,PDGFRA,CPEB3,COL18A1	8/143
13_Member	KEGG Pathway	hsa04611	Platelet activation	-3.74893	-1.91981	1277,1278,1281,2909,5590,10125,10235	COL1A1,COL1A2,COL3A1,ARHGAP35,PRKCZ,RASGRP1,RASGRP2	7/125
13_Member	GO Biological Processes	GO:0043200	response to amino acid	-3.68534	-1.86554	1277,1278,1281,1290,4915,5156,22849	COL1A1,COL1A2,COL3A1,COL5A2,NTRK2,PDGFRA,CPEB3	7/128
13_Member	GO Molecular Functions	GO:0046332	SMAD binding	-3.08301	-1.36976	1278,1281,1290,8091,10979	COL1A2,COL3A1,COL5A2,HMGA2,FERMT2	5/78
13_Member	GO Biological Processes	GO:0007179	transforming growth factor beta receptor signaling pathway	-2.60278	-1.00811	858,1278,1281,10979,201163	CAV2,COL1A2,COL3A1,FERMT2,FLCN	5/100
13_Member	GO Biological Processes	GO:0085029	extracellular matrix assembly	-2.56759	-0.982046	1278,1281,59277	COL1A2,COL3A1,NTN4	3/30
13_Member	KEGG Pathway	hsa04926	Relaxin signaling pathway	-2.12032	-0.646338	1277,1278,1281,5590,6464	COL1A1,COL1A2,COL3A1,PRKCZ,SHC1	5/130
13_Member	GO Biological Processes	GO:0007178	cell surface receptor protein serine/threonine kinase signaling pathway	-2.07479	-0.617363	858,1278,1281,10979,11030,201163	CAV2,COL1A2,COL3A1,FERMT2,RBPMS,FLCN	6/187
14_Summary	GO Biological Processes	GO:0034330	cell junction organization	-9.56432	-6.70896	998,1009,2185,2239,2335,2566,3684,3913,3915,4734,4744,4897,5800,6272,7414,7476,8496,10580,10979,25861,27445,54209,56288,201163,1942,4915,10507,1977,1996,3984,5590,10082	CDC42,CDH11,PTK2B,GPC4,FN1,GABRG2,ITGAM,LAMB2,LAMC1,NEDD4,NEFH,NRCAM,PTPRO,SORT1,VCL,WNT7A,PPFIBP1,SORBS1,FERMT2,WHRN,PCLO,TREM2,PARD3,FLCN,EFNA1,NTRK2,SEMA4D,EIF4E,ELAVL4,LIMK1,PRKCZ,GPC6	32/-
14_Member	GO Biological Processes	GO:0034330	cell junction organization	-9.56432	-6.70896	998,1009,2185,2239,2335,2566,3684,3913,3915,4734,4744,4897,5800,6272,7414,7476,8496,10580,10979,25861,27445,54209,56288,201163	CDC42,CDH11,PTK2B,GPC4,FN1,GABRG2,ITGAM,LAMB2,LAMC1,NEDD4,NEFH,NRCAM,PTPRO,SORT1,VCL,WNT7A,PPFIBP1,SORBS1,FERMT2,WHRN,PCLO,TREM2,PARD3,FLCN	24/533
14_Member	GO Biological Processes	GO:0034329	cell junction assembly	-7.04689	-4.57522	998,1009,2185,2335,2566,3915,4897,5800,7414,7476,10580,10979,27445,56288,201163	CDC42,CDH11,PTK2B,FN1,GABRG2,LAMC1,NRCAM,PTPRO,VCL,WNT7A,SORBS1,FERMT2,PCLO,PARD3,FLCN	15/285
14_Member	GO Biological Processes	GO:0050808	synapse organization	-4.71456	-2.67022	998,2239,2566,3684,3913,4734,4744,4897,6272,7476,8496,27445,54209	CDC42,GPC4,GABRG2,ITGAM,LAMB2,NEDD4,NEFH,NRCAM,SORT1,WNT7A,PPFIBP1,PCLO,TREM2	13/337
14_Member	GO Biological Processes	GO:0050807	regulation of synapse organization	-4.55919	-2.54084	998,1942,2185,2239,4734,4897,4915,5800,7476,10507,54209	CDC42,EFNA1,PTK2B,GPC4,NEDD4,NRCAM,NTRK2,PTPRO,WNT7A,SEMA4D,TREM2	11/252
14_Member	GO Biological Processes	GO:0050803	regulation of synapse structure or activity	-4.46583	-2.47894	998,1942,2185,2239,4734,4897,4915,5800,7476,10507,54209	CDC42,EFNA1,PTK2B,GPC4,NEDD4,NRCAM,NTRK2,PTPRO,WNT7A,SEMA4D,TREM2	11/258
14_Member	GO Cellular Components	GO:0098978	glutamatergic synapse	-4.29138	-2.3529	998,1009,1977,1996,2185,2239,3984,4897,5590,5800,6272,7476,10082,27445	CDC42,CDH11,EIF4E,ELAVL4,PTK2B,GPC4,LIMK1,NRCAM,PRKCZ,PTPRO,SORT1,WNT7A,GPC6,PCLO	14/424
14_Member	GO Biological Processes	GO:0099175	regulation of postsynapse organization	-2.47576	-0.917913	998,1942,2185,4897,7476	CDC42,EFNA1,PTK2B,NRCAM,WNT7A	5/107
15_Summary	GO Biological Processes	GO:0001501	skeletal system development	-9.33151	-6.5033	656,1009,1277,1278,1281,1290,1490,1909,2247,5156,6716,7045,7476,8091,10507,55790,55959,80781,81031,81792,91461,116039,285973,1289,2494,2909,3726,3880,10413,10653,58495,201163	BMP8B,CDH11,COL1A1,COL1A2,COL3A1,COL5A2,CCN2,EDNRA,FGF2,PDGFRA,SRD5A2,TGFBI,WNT7A,HMGA2,SEMA4D,CSGALNACT1,SULF2,COL18A1,SLC2A10,ADAMTS12,PKDCC,OSR2,ATG9B,COL5A1,NR5A2,ARHGAP35,JUNB,KRT19,YAP1,SPINT2,OVOL2,FLCN	32/-
15_Member	GO Biological Processes	GO:0001501	skeletal system development	-9.33151	-6.5033	656,1009,1277,1278,1281,1290,1490,1909,2247,5156,6716,7045,7476,8091,10507,55790,55959,80781,81031,81792,91461,116039,285973	BMP8B,CDH11,COL1A1,COL1A2,COL3A1,COL5A2,CCN2,EDNRA,FGF2,PDGFRA,SRD5A2,TGFBI,WNT7A,HMGA2,SEMA4D,CSGALNACT1,SULF2,COL18A1,SLC2A10,ADAMTS12,PKDCC,OSR2,ATG9B	23/502
15_Member	GO Biological Processes	GO:0051216	cartilage development	-7.00794	-4.54771	656,1277,1281,1490,2247,7045,7476,8091,55790,55959,81792,116039	BMP8B,COL1A1,COL3A1,CCN2,FGF2,TGFBI,WNT7A,HMGA2,CSGALNACT1,SULF2,ADAMTS12,OSR2	12/174
15_Member	GO Biological Processes	GO:0061448	connective tissue development	-6.49273	-4.12827	656,1277,1281,1289,1490,2247,7045,7476,8091,55790,55959,81792,116039	BMP8B,COL1A1,COL3A1,COL5A1,CCN2,FGF2,TGFBI,WNT7A,HMGA2,CSGALNACT1,SULF2,ADAMTS12,OSR2	13/232
15_Member	GO Biological Processes	GO:0002062	chondrocyte differentiation	-5.91135	-3.65051	1281,1490,7045,7476,8091,55959,81792,116039	COL3A1,CCN2,TGFBI,WNT7A,HMGA2,SULF2,ADAMTS12,OSR2	8/84
15_Member	GO Biological Processes	GO:0060348	bone development	-3.97988	-2.10738	1277,1281,6716,10507,55790,55959,81792,116039,285973	COL1A1,COL3A1,SRD5A2,SEMA4D,CSGALNACT1,SULF2,ADAMTS12,OSR2,ATG9B	9/197
15_Member	GO Biological Processes	GO:0009792	embryo development ending in birth or egg hatching	-3.21038	-1.47004	1277,1281,1909,2247,2494,2909,3726,3880,5156,10413,10653,55959,58495,81031,116039,201163	COL1A1,COL3A1,EDNRA,FGF2,NR5A2,ARHGAP35,JUNB,KRT19,PDGFRA,YAP1,SPINT2,SULF2,OVOL2,SLC2A10,OSR2,FLCN	16/670
15_Member	GO Biological Processes	GO:0048706	embryonic skeletal system development	-2.88246	-1.21368	1277,1909,5156,55959,81031,116039	COL1A1,EDNRA,PDGFRA,SULF2,SLC2A10,OSR2	6/128
15_Member	GO Biological Processes	GO:0048705	skeletal system morphogenesis	-2.83451	-1.18063	1277,1281,1490,5156,7476,55790,116039,285973	COL1A1,COL3A1,CCN2,PDGFRA,WNT7A,CSGALNACT1,OSR2,ATG9B	8/229
15_Member	GO Biological Processes	GO:0060349	bone morphogenesis	-2.60278	-1.00811	1277,1281,55790,116039,285973	COL1A1,COL3A1,CSGALNACT1,OSR2,ATG9B	5/100
15_Member	GO Biological Processes	GO:0043009	chordate embryonic development	-2.47427	-0.917126	1277,1281,1909,2909,3726,3880,5156,10413,10653,55959,58495,81031,116039,201163	COL1A1,COL3A1,EDNRA,ARHGAP35,JUNB,KRT19,PDGFRA,YAP1,SPINT2,SULF2,OVOL2,SLC2A10,OSR2,FLCN	14/649
16_Summary	GO Cellular Components	GO:0031252	cell leading edge	-9.09376	-6.32682	998,1464,2185,2566,3984,5058,5590,5800,7168,8910,10235,10630,10979,22902,23022,23362,51196,51466,54836,81848,84168,65009	CDC42,CSPG4,PTK2B,GABRG2,LIMK1,PAK1,PRKCZ,PTPRO,TPM1,SGCE,RASGRP2,PDPN,FERMT2,RUFY3,PALLD,PSD3,PLCE1,EVL,BSPRY,SPRY4,ANTXR1,NDRG4	22/-
16_Member	GO Cellular Components	GO:0031252	cell leading edge	-9.09376	-6.32682	998,1464,2185,2566,3984,5058,5590,5800,7168,8910,10235,10630,10979,22902,23022,23362,51196,51466,54836,81848,84168	CDC42,CSPG4,PTK2B,GABRG2,LIMK1,PAK1,PRKCZ,PTPRO,TPM1,SGCE,RASGRP2,PDPN,FERMT2,RUFY3,PALLD,PSD3,PLCE1,EVL,BSPRY,SPRY4,ANTXR1	21/428
16_Member	GO Cellular Components	GO:0031256	leading edge membrane	-6.8734	-4.44049	998,1464,2566,5058,7168,8910,10235,10630,10979,23362,81848,84168	CDC42,CSPG4,GABRG2,PAK1,TPM1,SGCE,RASGRP2,PDPN,FERMT2,PSD3,SPRY4,ANTXR1	12/179
16_Member	GO Cellular Components	GO:0030027	lamellipodium	-6.28391	-3.95838	1464,2185,3984,5058,5800,10630,10979,22902,23022,51196,51466,84168	CSPG4,PTK2B,LIMK1,PAK1,PTPRO,PDPN,FERMT2,RUFY3,PALLD,PLCE1,EVL,ANTXR1	12/203
16_Member	GO Cellular Components	GO:0031253	cell projection membrane	-3.85154	-2.00451	1464,2566,5058,7168,8910,10235,10630,10979,23362,65009,81848,84168	CSPG4,GABRG2,PAK1,TPM1,SGCE,RASGRP2,PDPN,FERMT2,PSD3,NDRG4,SPRY4,ANTXR1	12/355
16_Member	GO Cellular Components	GO:0001726	ruffle	-3.45257	-1.67756	1464,5058,7168,10235,10630,23022,23362,81848	CSPG4,PAK1,TPM1,RASGRP2,PDPN,PALLD,PSD3,SPRY4	8/184
16_Member	GO Cellular Components	GO:0032587	ruffle membrane	-3.44644	-1.67259	5058,7168,10235,10630,23362,81848	PAK1,TPM1,RASGRP2,PDPN,PSD3,SPRY4	6/100
17_Summary	GO Biological Processes	GO:0007167	enzyme-linked receptor protein signaling pathway	-8.98185	-6.24247	858,1277,1278,1281,1464,1490,1942,2042,2185,2247,2591,2675,3488,4915,5058,5156,6272,6464,7525,10580,10979,11030,51196,55959,201163,857,1454,1996,4609,7476,10653,81792	CAV2,COL1A1,COL1A2,COL3A1,CSPG4,CCN2,EFNA1,EPHA3,PTK2B,FGF2,GALNT3,GFRA2,IGFBP5,NTRK2,PAK1,PDGFRA,SORT1,SHC1,YES1,SORBS1,FERMT2,RBPMS,PLCE1,SULF2,FLCN,CAV1,CSNK1E,ELAVL4,MYC,WNT7A,SPINT2,ADAMTS12	32/-
17_Member	GO Biological Processes	GO:0007167	enzyme-linked receptor protein signaling pathway	-8.98185	-6.24247	858,1277,1278,1281,1464,1490,1942,2042,2185,2247,2591,2675,3488,4915,5058,5156,6272,6464,7525,10580,10979,11030,51196,55959,201163	CAV2,COL1A1,COL1A2,COL3A1,CSPG4,CCN2,EFNA1,EPHA3,PTK2B,FGF2,GALNT3,GFRA2,IGFBP5,NTRK2,PAK1,PDGFRA,SORT1,SHC1,YES1,SORBS1,FERMT2,RBPMS,PLCE1,SULF2,FLCN	25/618
17_Member	GO Biological Processes	GO:0007169	cell surface receptor protein tyrosine kinase signaling pathway	-8.41202	-5.71851	858,1277,1464,1490,1942,2042,2185,2247,2591,2675,3488,4915,5058,5156,6272,6464,7525,10580,51196,55959	CAV2,COL1A1,CSPG4,CCN2,EFNA1,EPHA3,PTK2B,FGF2,GALNT3,GFRA2,IGFBP5,NTRK2,PAK1,PDGFRA,SORT1,SHC1,YES1,SORBS1,PLCE1,SULF2	20/423
17_Member	GO Biological Processes	GO:0070848	response to growth factor	-7.58332	-5.01475	857,858,1277,1278,1281,1454,1490,1996,2247,2591,4609,4915,5156,6272,6464,7476,7525,10653,10979,81792,201163	CAV1,CAV2,COL1A1,COL1A2,COL3A1,CSNK1E,CCN2,ELAVL4,FGF2,GALNT3,MYC,NTRK2,PDGFRA,SORT1,SHC1,WNT7A,YES1,SPINT2,FERMT2,ADAMTS12,FLCN	21/522
17_Member	GO Biological Processes	GO:0071363	cellular response to growth factor stimulus	-7.34977	-4.82626	857,858,1277,1278,1281,1454,1490,1996,2247,2591,4915,5156,6272,6464,7476,7525,10653,10979,81792,201163	CAV1,CAV2,COL1A1,COL1A2,COL3A1,CSNK1E,CCN2,ELAVL4,FGF2,GALNT3,NTRK2,PDGFRA,SORT1,SHC1,WNT7A,YES1,SPINT2,FERMT2,ADAMTS12,FLCN	20/490
18_Summary	GO Biological Processes	GO:0010810	regulation of cell-substrate adhesion	-8.52095	-5.8077	182,998,1277,2042,2185,2335,4811,5054,5590,5800,7414,9448,10630,10979,81848,10982,23362	JAG1,CDC42,COL1A1,EPHA3,PTK2B,FN1,NID1,SERPINE1,PRKCZ,PTPRO,VCL,MAP4K4,PDPN,FERMT2,SPRY4,MAPRE2,PSD3	17/-
18_Member	GO Biological Processes	GO:0010810	regulation of cell-substrate adhesion	-8.52095	-5.8077	182,998,1277,2042,2185,2335,4811,5054,5590,5800,7414,9448,10630,10979,81848	JAG1,CDC42,COL1A1,EPHA3,PTK2B,FN1,NID1,SERPINE1,PRKCZ,PTPRO,VCL,MAP4K4,PDPN,FERMT2,SPRY4	15/221
18_Member	GO Biological Processes	GO:0001952	regulation of cell-matrix adhesion	-4.6233	-2.60086	182,2042,2185,5054,5590,7414,9448,10979	JAG1,EPHA3,PTK2B,SERPINE1,PRKCZ,VCL,MAP4K4,FERMT2	8/125
18_Member	GO Biological Processes	GO:0010811	positive regulation of cell-substrate adhesion	-3.77053	-1.93702	998,2185,2335,4811,5590,9448,10979	CDC42,PTK2B,FN1,NID1,PRKCZ,MAP4K4,FERMT2	7/124
18_Member	GO Biological Processes	GO:0150116	regulation of cell-substrate junction organization	-3.35665	-1.59721	2042,7414,9448,10979,10982	EPHA3,VCL,MAP4K4,FERMT2,MAPRE2	5/68
18_Member	GO Biological Processes	GO:0032012	regulation of ARF protein signal transduction	-3.02538	-1.32604	9448,10982,23362	MAP4K4,MAPRE2,PSD3	3/21
18_Member	GO Biological Processes	GO:0001954	positive regulation of cell-matrix adhesion	-2.73045	-1.108	2185,5590,9448,10979	PTK2B,PRKCZ,MAP4K4,FERMT2	4/56
18_Member	GO Biological Processes	GO:0051893	regulation of focal adhesion assembly	-2.54254	-0.962969	2042,7414,9448,10979	EPHA3,VCL,MAP4K4,FERMT2	4/63
18_Member	GO Biological Processes	GO:0090109	regulation of cell-substrate junction assembly	-2.54254	-0.962969	2042,7414,9448,10979	EPHA3,VCL,MAP4K4,FERMT2	4/63
18_Member	GO Biological Processes	GO:0150117	positive regulation of cell-substrate junction organization	-2.52637	-0.951234	9448,10979,10982	MAP4K4,FERMT2,MAPRE2	3/31
19_Summary	GO Biological Processes	GO:0003013	circulatory system process	-8.48242	-5.77914	857,998,1278,1909,2028,2909,3672,5800,6324,6507,6546,7168,7525,8671,8870,10257,10413,10979,23327,81031,143872,340481,808,2185,3488,5590,7476,56288	CAV1,CDC42,COL1A2,EDNRA,ENPEP,ARHGAP35,ITGA1,PTPRO,SCN1B,SLC1A3,SLC8A1,TPM1,YES1,SLC4A4,IER3,ABCC4,YAP1,FERMT2,NEDD4L,SLC2A10,ARHGAP42,ZDHHC21,CALM3,PTK2B,IGFBP5,PRKCZ,WNT7A,PARD3	28/-
19_Member	GO Biological Processes	GO:0003013	circulatory system process	-8.48242	-5.77914	857,998,1278,1909,2028,2909,3672,5800,6324,6507,6546,7168,7525,8671,8870,10257,10413,10979,23327,81031,143872,340481	CAV1,CDC42,COL1A2,EDNRA,ENPEP,ARHGAP35,ITGA1,PTPRO,SCN1B,SLC1A3,SLC8A1,TPM1,YES1,SLC4A4,IER3,ABCC4,YAP1,FERMT2,NEDD4L,SLC2A10,ARHGAP42,ZDHHC21	22/509
19_Member	GO Biological Processes	GO:0008015	blood circulation	-6.29353	-3.96384	857,998,1278,1909,2028,2909,3672,5800,6324,6546,7168,7525,8870,10979,23327,143872,340481	CAV1,CDC42,COL1A2,EDNRA,ENPEP,ARHGAP35,ITGA1,PTPRO,SCN1B,SLC8A1,TPM1,YES1,IER3,FERMT2,NEDD4L,ARHGAP42,ZDHHC21	17/419
19_Member	GO Biological Processes	GO:0003018	vascular process in circulatory system	-5.68093	-3.48131	857,1909,2909,3672,6507,6546,7525,8671,10257,10979,81031,143872,340481	CAV1,EDNRA,ARHGAP35,ITGA1,SLC1A3,SLC8A1,YES1,SLC4A4,ABCC4,FERMT2,SLC2A10,ARHGAP42,ZDHHC21	13/274
19_Member	GO Biological Processes	GO:0010649	regulation of cell communication by electrical coupling	-3.47324	-1.69354	808,857,6546	CALM3,CAV1,SLC8A1	3/15
19_Member	GO Biological Processes	GO:0002027	regulation of heart rate	-3.3551	-1.59721	808,857,1909,6324,6546,7168	CALM3,CAV1,EDNRA,SCN1B,SLC8A1,TPM1	6/104
19_Member	GO Biological Processes	GO:0044057	regulation of system process	-2.98325	-1.2907	808,857,1909,2185,3488,5590,5800,6324,6546,7168,7476,56288,143872,340481	CALM3,CAV1,EDNRA,PTK2B,IGFBP5,PRKCZ,PTPRO,SCN1B,SLC8A1,TPM1,WNT7A,PARD3,ARHGAP42,ZDHHC21	14/571
19_Member	GO Biological Processes	GO:0051899	membrane depolarization	-2.75947	-1.12958	857,5590,6324,6546	CAV1,PRKCZ,SCN1B,SLC8A1	4/55
19_Member	GO Molecular Functions	GO:0044325	transmembrane transporter binding	-2.74819	-1.12245	808,857,6324,6546,7525,23327	CALM3,CAV1,SCN1B,SLC8A1,YES1,NEDD4L	6/136
19_Member	GO Biological Processes	GO:1903522	regulation of blood circulation	-2.49353	-0.929232	808,857,1909,6324,6546,7168,143872,340481	CALM3,CAV1,EDNRA,SCN1B,SLC8A1,TPM1,ARHGAP42,ZDHHC21	8/260
19_Member	GO Biological Processes	GO:0035296	regulation of tube diameter	-2.49259	-0.929232	857,1909,3672,6546,143872,340481	CAV1,EDNRA,ITGA1,SLC8A1,ARHGAP42,ZDHHC21	6/153
19_Member	GO Biological Processes	GO:0097746	blood vessel diameter maintenance	-2.49259	-0.929232	857,1909,3672,6546,143872,340481	CAV1,EDNRA,ITGA1,SLC8A1,ARHGAP42,ZDHHC21	6/153
19_Member	GO Biological Processes	GO:0035150	regulation of tube size	-2.47866	-0.920104	857,1909,3672,6546,143872,340481	CAV1,EDNRA,ITGA1,SLC8A1,ARHGAP42,ZDHHC21	6/154
19_Member	GO Biological Processes	GO:0042310	vasoconstriction	-2.41104	-0.868457	857,1909,6546	CAV1,EDNRA,SLC8A1	3/34
19_Member	GO Biological Processes	GO:0006937	regulation of muscle contraction	-2.246	-0.741881	808,857,6546,7168,143872,340481	CALM3,CAV1,SLC8A1,TPM1,ARHGAP42,ZDHHC21	6/172
19_Member	GO Biological Processes	GO:0090257	regulation of muscle system process	-2.0112	-0.578818	808,857,3488,6546,7168,143872,340481	CALM3,CAV1,IGFBP5,SLC8A1,TPM1,ARHGAP42,ZDHHC21	7/252
20_Summary	GO Biological Processes	GO:0030855	epithelial cell differentiation	-8.12276	-5.46624	182,857,998,1266,1909,2247,2494,3664,3880,3883,3913,5800,7476,10409,10413,10630,10653,23022,23086,25861,58495,80736,80781,122786	JAG1,CAV1,CDC42,CNN3,EDNRA,FGF2,NR5A2,IRF6,KRT19,KRT33A,LAMB2,PTPRO,WNT7A,BASP1,YAP1,PDPN,SPINT2,PALLD,EXPH5,WHRN,OVOL2,SLC44A4,COL18A1,FRMD6	24/-
20_Member	GO Biological Processes	GO:0030855	epithelial cell differentiation	-8.12276	-5.46624	182,857,998,1266,1909,2247,2494,3664,3880,3883,3913,5800,7476,10409,10413,10630,10653,23022,23086,25861,58495,80736,80781,122786	JAG1,CAV1,CDC42,CNN3,EDNRA,FGF2,NR5A2,IRF6,KRT19,KRT33A,LAMB2,PTPRO,WNT7A,BASP1,YAP1,PDPN,SPINT2,PALLD,EXPH5,WHRN,OVOL2,SLC44A4,COL18A1,FRMD6	24/631
20_Member	GO Biological Processes	GO:0002064	epithelial cell development	-4.84821	-2.78479	182,1909,3913,7476,10413,10653,23022,23086,80781,122786	JAG1,EDNRA,LAMB2,WNT7A,YAP1,SPINT2,PALLD,EXPH5,COL18A1,FRMD6	10/192
20_Member	GO Biological Processes	GO:0003382	epithelial cell morphogenesis	-3.55944	-1.76538	10653,23022,80781,122786	SPINT2,PALLD,COL18A1,FRMD6	4/34
